# Supplementary material for: Dienogest interrupts the chemokine signalling axis in endometriotic lesions with resistant signatures providing novel opportunities for personalised treatment.
Source: Research Square preprint supplement (doi:10.21203/rs.3.rs-8096027/v1), 2026-01-13
Supplement: Supplementary file 1 [file 03a606b9d732bc1af40923fb.xlsx]

## Sheet: Sheet1
Supplementary Table 2: DEG between treated and non-treated in epithelial cells
gene_ID	p_val	avg_log2FC	pct.1	pct.2	p_val_adj	mean_response_TRUE	mean_response_FALSE
CLU	1.08725e-44	-1.7347	0.115	0.308	3.03777e-40	2.0603	0.857901
CHI3L1	7.81007e-39	-1.58046	0.019	0.118	2.18213e-34	1.25875	0.163256
ATP2C2	2.46131e-35	0.856086	0.373	0.119	6.8769e-31	1.28994	1.88334
MUC4	3.33285e-35	0.959741	0.366	0.121	9.31199e-31	1.148	1.81324
ELF3	1.66921e-29	0.800209	0.653	0.423	4.66376e-25	2.31555	2.87021
WNK2	6.61036e-29	0.948687	0.278	0.077	1.84694e-24	0.780644	1.43822
TMC5	3.01624e-27	0.678655	0.355	0.136	8.42737e-23	1.14697	1.61738
SLC7A2	1.01742e-26	-0.945812	0.219	0.391	2.84267e-22	1.98826	1.33267
LGALS4	1.75082e-25	0.923672	0.267	0.08	4.89178e-21	0.891425	1.53167
LONRF2	2.32953e-25	-0.980991	0.184	0.343	6.5087e-21	1.83353	1.15356
PIGR	2.91159e-25	0.771929	0.301	0.107	8.13497e-21	1.0586	1.59366
LLGL2	3.74636e-25	0.696436	0.42	0.207	1.04673e-20	1.26215	1.74488
AC103702.2	1.12551e-24	0.551086	0.344	0.131	3.14467e-20	1.42023	1.80222
NPIPB15	3.74701e-24	0.89712	0.269	0.092	1.04691e-19	0.701631	1.32347
NXPE4	8.18485e-24	0.93815	0.233	0.066	2.28685e-19	0.677853	1.32813
RSRP1	9.80357e-24	0.520384	0.591	0.374	2.73912e-19	1.85037	2.21108
MTRNR2L12	2.32736e-23	-0.951309	0.38	0.522	6.50264e-19	2.67109	2.01169
NXPE1	1.42158e-22	0.58792	0.32	0.122	3.9719e-18	1.36867	1.77618
DNAJB1	1.68533e-22	-2.05122	0.08	0.191	4.70881e-18	2.03728	0.615482
CKB	1.68779e-22	0.99532	0.217	0.06	4.71569e-18	0.689798	1.3797
SELENBP1	3.29046e-22	0.840639	0.241	0.075	9.19356e-18	0.920943	1.50363
CDHR1	1.13365e-21	0.683714	0.225	0.064	3.16742e-17	0.756917	1.23083
TMEM63A	1.18654e-21	0.548779	0.416	0.218	3.31521e-17	1.34195	1.72233
PRKAG2	2.96283e-21	0.713259	0.358	0.174	8.27816e-17	1.11259	1.60698
FRYL	4.60257e-21	0.703341	0.461	0.263	1.28596e-16	1.51536	2.00288
AC068587.4	8.66239e-21	0.686544	0.273	0.106	2.42027e-16	0.841035	1.31691
PLCG2	1.11483e-20	-2.14517	0.578	0.602	3.11483e-16	3.94479	2.45787
RNF43	5.48901e-20	0.67315	0.249	0.09	1.53363e-15	0.796143	1.26274
POF1B	1.30403e-19	0.760793	0.167	0.037	3.64347e-15	0.433882	0.961223
SATB2	3.50883e-19	0.563422	0.194	0.054	9.80367e-15	0.707429	1.09796
SLC12A2	3.53662e-19	0.783964	0.276	0.118	9.88133e-15	0.94008	1.48348
AMN	6.13584e-19	0.642914	0.212	0.069	1.71435e-14	0.633307	1.07894
ERN2	9.70121e-19	0.544496	0.214	0.067	2.71052e-14	0.816826	1.19424
PCSK7	1.12102e-18	0.49888	0.437	0.249	3.13213e-14	1.57494	1.92073
HNF1A-AS1	2.4205e-18	0.427879	0.347	0.168	6.76288e-14	1.34163	1.63821
TFCP2L1	3.08847e-18	0.518163	0.395	0.212	8.62919e-14	1.40732	1.76648
SLC22A18	3.11001e-18	0.72862	0.174	0.046	8.68936e-14	0.510608	1.01565
MUC12	3.78189e-18	0.633325	0.287	0.121	1.05666e-13	1.47295	1.91194
TRABD2A	1.89888e-17	0.499714	0.222	0.079	5.30546e-13	0.904483	1.25086
SLC44A4	1.99445e-17	0.702382	0.21	0.073	5.57248e-13	0.621681	1.10854
MT-ND4	2.6079e-17	-0.756801	0.618	0.685	7.28647e-13	3.53896	3.01438
SYTL2	2.99642e-17	0.475165	0.257	0.104	8.37198e-13	1.13967	1.46903
SPPL2B	4.25647e-17	0.617589	0.276	0.125	1.18926e-12	0.873366	1.30145
CDH17	1.35954e-16	0.657712	0.151	0.037	3.79856e-12	0.422521	0.878412
FAM3D	1.46287e-16	0.530055	0.159	0.041	4.08727e-12	0.534061	0.901466
LRATD1	1.57207e-16	0.682987	0.125	0.022	4.39236e-12	0.214771	0.688182
AC254629.1	2.19265e-16	0.627328	0.152	0.038	6.12628e-12	0.482166	0.916997
NRP1	2.21197e-16	-0.952691	0.083	0.178	6.18024e-12	1.23437	0.574015
TMPRSS4	2.89097e-16	0.569837	0.212	0.079	8.07736e-12	0.687563	1.08254
HSP90AA1	6.09162e-16	-1.98612	0.381	0.474	1.702e-11	3.24319	1.86652
CC2D1A	6.40282e-16	0.616495	0.194	0.069	1.78895e-11	0.556356	0.983678
MIR194-2HG	1.39313e-15	0.622248	0.133	0.029	3.89239e-11	0.334147	0.765456
ATP10B	1.61445e-15	0.526946	0.177	0.056	4.51078e-11	0.643234	1.00849
ARHGAP29	1.64101e-15	-0.903549	0.133	0.241	4.58497e-11	1.51333	0.887039
ABR	1.99917e-15	0.502216	0.219	0.087	5.58568e-11	0.796401	1.14451
DIAPH2	3.10534e-15	0.502432	0.366	0.206	8.67631e-11	1.21145	1.55971
AL390719.2	4.00223e-15	0.624335	0.208	0.081	1.11822e-10	0.612398	1.04515
SPRY1	4.21093e-15	-0.76494	0.168	0.283	1.17653e-10	1.59541	1.06519
PDXDC1	6.05657e-15	0.346189	0.463	0.288	1.69221e-10	1.61337	1.85333
ABCC3	7.34056e-15	0.489547	0.422	0.256	2.05095e-10	1.48658	1.82591
ESRP1	1.17268e-14	0.615885	0.162	0.052	3.27646e-10	0.4196	0.846499
PAEP	1.2147e-14	-0.976566	0.139	0.248	3.39388e-10	2.05153	1.37462
ESRRA	1.42309e-14	0.591796	0.195	0.075	3.9761e-10	0.59912	1.00932
SLC40A1	2.7018e-14	-1.10585	0.042	0.109	7.54882e-10	1.06786	0.301339
SRSF7	2.77555e-14	0.485235	0.392	0.232	7.7549e-10	1.26446	1.6008
ZNF91	2.94458e-14	0.423973	0.347	0.195	8.22717e-10	1.16202	1.4559
MLXIP	3.12067e-14	0.476977	0.374	0.216	8.71916e-10	1.41267	1.74328
EPCAM	3.19181e-14	0.566126	0.233	0.106	8.91792e-10	0.71708	1.10949
RHOT2	3.36874e-14	0.628403	0.241	0.114	9.41227e-10	0.734974	1.17055
RSBN1L	4.68282e-14	0.51538	0.222	0.097	1.30838e-09	0.69326	1.05049
ABO	6.5746e-14	0.454229	0.147	0.043	1.83694e-09	0.494443	0.809291
TMEM259	6.92842e-14	0.451563	0.362	0.206	1.9358e-09	1.22973	1.54273
CDCA7	6.95213e-14	0.707763	0.163	0.056	1.94243e-09	0.569079	1.05966
SRSF10	7.25005e-14	0.426493	0.52	0.359	2.02566e-09	1.68146	1.97708
DGLUCY	8.14844e-14	0.487231	0.206	0.085	2.27667e-09	0.643073	0.980796
D2HGDH	8.37185e-14	0.49171	0.259	0.126	2.33909e-09	0.897539	1.23837
CCDC14	1.10316e-13	0.494764	0.433	0.284	3.08224e-09	1.4959	1.83885
MT-ND2	1.23481e-13	-0.687635	0.531	0.595	3.45006e-09	3.07577	2.59913
BCL6	1.24912e-13	-0.769151	0.082	0.168	3.49005e-09	1.11481	0.581671
MT-ND3	1.25811e-13	-0.661587	0.604	0.661	3.51515e-09	3.46974	3.01117
SYNE2	2.84115e-13	-0.587975	0.726	0.768	7.93817e-09	3.3738	2.96624
AC136475.3	3.03937e-13	-0.686107	0.08	0.165	8.492e-09	1.0224	0.546826
BICD1	3.62245e-13	-0.636602	0.234	0.353	1.01211e-08	1.84579	1.40454
ARHGAP8	7.45438e-13	0.490026	0.276	0.143	2.08275e-08	0.900079	1.23974
DNM2	8.57706e-13	0.345649	0.273	0.136	2.39643e-08	1.07285	1.31243
EPS8L3	8.90551e-13	0.535935	0.12	0.031	2.4882e-08	0.381096	0.752578
MUC5B	9.70186e-13	0.587443	0.217	0.098	2.7107e-08	1.03887	1.44606
TAOK3	1.51047e-12	0.501752	0.215	0.1	4.22025e-08	0.724713	1.0725
GOT1	1.54635e-12	0.618404	0.103	0.022	4.3205e-08	0.163726	0.592371
PKHD1L1	1.66772e-12	-0.356767	0.089	0.18	4.6596e-08	1.21115	0.96386
B3GALT5	1.98629e-12	0.707259	0.134	0.042	5.5497e-08	0.541237	1.03147
MALAT1	2.09209e-12	0.147268	1	1	5.84531e-08	7.26967	7.37174
MTRNR2L8	2.67904e-12	-0.772742	0.099	0.185	7.48523e-08	1.23638	0.700754
VIL1	2.83854e-12	0.445668	0.141	0.046	7.93087e-08	0.532522	0.841436
MT-ND4L	3.68843e-12	-0.709206	0.252	0.363	1.03055e-07	1.98901	1.49743
PPP1R12B	4.12834e-12	0.462539	0.246	0.126	1.15346e-07	0.85967	1.18028
TSPAN8	4.35761e-12	0.499558	0.109	0.026	1.21752e-07	0.306067	0.652334
NUMB	4.81206e-12	0.485072	0.275	0.151	1.34449e-07	0.867467	1.20369
ESRP2	4.86981e-12	0.545889	0.113	0.03	1.36063e-07	0.238381	0.616763
PGGHG	5.35075e-12	-0.530295	0.235	0.351	1.495e-07	1.80788	1.44031
HSD11B2	5.57338e-12	0.462598	0.112	0.029	1.5572e-07	0.356732	0.677381
CCND2	5.61365e-12	0.396313	0.2	0.088	1.56845e-07	0.783029	1.05773
TNFRSF14	5.8705e-12	0.348672	0.265	0.136	1.64022e-07	0.98354	1.22522
NR3C2	6.14768e-12	0.473129	0.109	0.028	1.71766e-07	0.304005	0.631954
CLDN7	6.80771e-12	0.447414	0.273	0.148	1.90208e-07	0.994244	1.30437
CLN3	7.06209e-12	0.610056	0.145	0.052	1.97315e-07	0.400261	0.823119
ENC1	8.51941e-12	0.521968	0.13	0.042	2.38032e-07	0.361379	0.723179
SLC35A3	8.7069e-12	0.49019	0.271	0.151	2.43271e-07	0.943273	1.28305
ATP1A1	8.73764e-12	0.355883	0.264	0.139	2.4413e-07	1.02523	1.27191
EHF	8.94481e-12	0.421533	0.299	0.169	2.49918e-07	1.10148	1.39366
FAN1	8.96248e-12	0.471961	0.197	0.089	2.50412e-07	0.620666	0.947805
SEMA3B	9.14565e-12	-0.577702	0.252	0.37	2.5553e-07	1.86992	1.46949
MT-CO3	9.3576e-12	-0.50115	0.681	0.717	2.61451e-07	3.72853	3.38116
PLCE1	9.47384e-12	0.403957	0.224	0.106	2.64699e-07	0.902064	1.18207
NT5C	1.03456e-11	0.495148	0.189	0.084	2.89055e-07	0.532573	0.875784
CAST	1.12493e-11	0.381741	0.45	0.298	3.14304e-07	1.59137	1.85598
STARD10	1.1455e-11	0.417594	0.115	0.031	3.20053e-07	0.36227	0.651724
ARL16	1.19938e-11	0.555578	0.148	0.055	3.35106e-07	0.388521	0.773619
ADAMTS1	1.43153e-11	-0.784542	0.126	0.216	3.99969e-07	1.49921	0.955407
PDCD4	1.58754e-11	0.300828	0.247	0.127	4.43558e-07	1.01661	1.22513
RALGPS2	1.61066e-11	0.490896	0.225	0.111	4.5002e-07	0.740175	1.08044
LIMA1	1.74741e-11	0.429632	0.276	0.148	4.88226e-07	1.04756	1.34536
HRH1	1.90648e-11	-0.6282	0.095	0.177	5.32671e-07	1.07501	0.639571
CD55	2.00043e-11	-0.750306	0.16	0.256	5.5892e-07	1.57514	1.05507
BICDL2	2.0228e-11	0.465151	0.265	0.144	5.6517e-07	1.01934	1.34176
NSF	2.02634e-11	0.505815	0.112	0.031	5.66159e-07	0.269787	0.620391
CLMN	2.02763e-11	0.353437	0.293	0.164	5.66521e-07	1.05267	1.29766
AKAP1	2.6126e-11	0.375222	0.253	0.132	7.29962e-07	0.946332	1.20642
PDHA1	3.78871e-11	0.536674	0.173	0.076	1.05857e-06	0.520179	0.892173
TNFRSF11A	3.91148e-11	0.378857	0.112	0.031	1.09287e-06	0.374617	0.637221
CFTR	4.37919e-11	0.299537	0.251	0.128	1.22354e-06	1.13035	1.33798
BDH1	4.99716e-11	0.443108	0.116	0.035	1.39621e-06	0.32763	0.634769
DHRS11	5.5571e-11	0.539048	0.102	0.026	1.55265e-06	0.272749	0.646388
HSPD1	6.42348e-11	-1.5545	0.276	0.367	1.79472e-06	2.42349	1.346
DLX6-AS1	6.42401e-11	-0.620685	0.073	0.145	1.79487e-06	0.904948	0.474722
AGR2	7.49511e-11	0.441909	0.119	0.038	2.09413e-06	0.376407	0.682715
IP6K2	7.53489e-11	0.437438	0.182	0.083	2.10525e-06	0.573936	0.877145
SLC28A3	7.583e-11	-0.958621	0.047	0.105	2.11869e-06	0.967506	0.30304
LPCAT4	7.69051e-11	0.375844	0.142	0.052	2.14873e-06	0.528926	0.789441
GSTK1	8.15514e-11	0.421074	0.247	0.135	2.27855e-06	0.852812	1.14468
NEO1	8.48869e-11	0.44125	0.177	0.08	2.37174e-06	0.595557	0.901408
PPIL2	8.55625e-11	0.47398	0.181	0.083	2.39062e-06	0.572681	0.901219
CHORDC1	8.99747e-11	-0.958647	0.149	0.233	2.51389e-06	1.40586	0.741378
ABCA5	9.16132e-11	0.52106	0.222	0.115	2.55967e-06	0.739341	1.10051
PNKP	9.49675e-11	0.409083	0.206	0.102	2.65339e-06	0.719472	1.00303
BAIAP2L2	1.09483e-10	0.370254	0.152	0.062	3.05897e-06	0.567075	0.823716
AFG3L2	1.12772e-10	0.455168	0.218	0.111	3.15086e-06	0.761984	1.07748
ARHGEF38	1.15996e-10	0.427726	0.118	0.038	3.24093e-06	0.379394	0.675871
SDHA	1.25113e-10	0.48909	0.179	0.083	3.49565e-06	0.568752	0.907763
UNC13B	1.37093e-10	0.352966	0.166	0.071	3.83038e-06	0.656087	0.900744
MT-CO1	1.38185e-10	-0.410888	0.723	0.759	3.86089e-06	3.90725	3.62245
AC007114.2	1.42389e-10	0.515377	0.102	0.029	3.97836e-06	0.224567	0.5818
TMEM161B-AS1	1.46031e-10	0.379354	0.334	0.206	4.08009e-06	1.25257	1.51552
PHYKPL	1.5769e-10	0.305704	0.245	0.131	4.40587e-06	0.933343	1.14524
KIF13B	1.80276e-10	0.45326	0.348	0.219	5.0369e-06	1.24701	1.56118
NCOR1	1.89172e-10	0.290553	0.402	0.263	5.28547e-06	1.42706	1.62845
TBC1D2B	1.97844e-10	0.457785	0.116	0.038	5.52777e-06	0.320949	0.638262
PIGZ	2.21688e-10	0.482072	0.1	0.028	6.19396e-06	0.268975	0.603122
KCNK6	2.42956e-10	-0.988152	0.138	0.22	6.7882e-06	1.54463	0.859695
C3	2.62225e-10	-0.574602	0.174	0.269	7.32658e-06	1.46255	1.06427
NANS	2.76865e-10	0.37144	0.133	0.048	7.7356e-06	0.515822	0.773285
MUS81	2.88907e-10	0.415864	0.165	0.072	8.07206e-06	0.56456	0.852815
R3HDM2	3.12607e-10	0.447069	0.265	0.152	8.73423e-06	0.939969	1.24985
SYNJ2	3.18638e-10	0.395028	0.185	0.087	8.90276e-06	0.664918	0.93873
ARHGAP27	3.37545e-10	0.460415	0.126	0.045	9.43101e-06	0.428013	0.747148
FXYD3	3.88588e-10	0.418177	0.105	0.031	1.08572e-05	0.368701	0.658559
AL354733.3	4.1874e-10	0.394073	0.187	0.089	1.16996e-05	0.639459	0.91261
NAMPT	4.40744e-10	-0.66156	0.168	0.257	1.23144e-05	1.49828	1.03973
ABHD11	4.76571e-10	0.420072	0.174	0.081	1.33154e-05	0.593503	0.884675
CASK	5.19272e-10	0.448588	0.148	0.062	1.45085e-05	0.455529	0.766467
GPX3	5.28947e-10	-0.753205	0.078	0.147	1.47788e-05	1.07295	0.55087
DUSP4	6.03831e-10	-0.597938	0.06	0.123	1.6871e-05	0.871442	0.456982
TRPM4	6.0438e-10	0.321768	0.138	0.054	1.68864e-05	0.5423	0.765332
NFATC2IP	6.19592e-10	0.28913	0.346	0.22	1.73114e-05	1.3212	1.52161
MLX	8.25149e-10	0.492445	0.129	0.05	2.30547e-05	0.356985	0.698322
TOX4	8.38456e-10	0.472132	0.159	0.071	2.34265e-05	0.478978	0.806234
RERE	9.01299e-10	0.266327	0.434	0.287	2.51823e-05	1.52366	1.70826
TPM1	1.01817e-09	0.294687	0.51	0.366	2.84476e-05	1.97121	2.17547
ZZEF1	1.12629e-09	0.325692	0.189	0.09	3.14684e-05	0.759889	0.985641
BCAS1	1.18764e-09	0.421181	0.107	0.034	3.31827e-05	0.406088	0.698029
TMEM87A	1.22129e-09	0.274345	0.225	0.119	3.41229e-05	0.885774	1.07594
ZKSCAN1	1.23951e-09	0.301097	0.445	0.315	3.4632e-05	1.62599	1.83469
TP53I3	1.25698e-09	0.494121	0.145	0.063	3.512e-05	0.490134	0.832633
HMGXB3	1.32264e-09	0.329271	0.239	0.131	3.69546e-05	0.866785	1.09502
HSPA1B	1.40566e-09	-0.65628	0.071	0.136	3.9274e-05	0.933286	0.478387
LRFN5	1.43066e-09	-0.424002	0.05	0.107	3.99728e-05	0.649465	0.355569
PURA	1.54889e-09	0.418122	0.221	0.121	4.32759e-05	0.740257	1.03008
SORBS2	1.62822e-09	0.406633	0.245	0.14	4.54925e-05	0.897962	1.17982
USP15	1.74715e-09	0.299249	0.304	0.187	4.88154e-05	1.09278	1.3002
GPSM2	1.77394e-09	0.39673	0.105	0.034	4.95639e-05	0.277562	0.552554
NHLRC3	1.90692e-09	0.366313	0.179	0.088	5.32793e-05	0.629631	0.88354
DNAJA4	2.52054e-09	-1.39242	0.057	0.114	7.0424e-05	1.34839	0.383238
CYP3A5	2.57297e-09	0.299491	0.219	0.114	7.18888e-05	1.0928	1.30039
CADM1	2.95433e-09	-0.590972	0.077	0.143	8.25439e-05	0.887073	0.477443
USP43	3.30318e-09	-0.605274	0.141	0.223	9.22908e-05	1.20369	0.784145
SLC4A4	3.35314e-09	0.122118	0.139	0.055	9.36868e-05	0.751677	0.836323
COG4	3.40445e-09	0.40966	0.141	0.06	9.51205e-05	0.476518	0.760473
SPSB3	3.43981e-09	0.525964	0.122	0.048	9.61082e-05	0.325625	0.690196
WNK4	3.44338e-09	0.37658	0.136	0.055	9.6208e-05	0.624864	0.885889
TNFRSF25	3.52976e-09	0.389936	0.14	0.06	9.86214e-05	0.473502	0.743785
TPR	3.58628e-09	0.18545	0.45	0.309	0.000100201	1.65727	1.78581
MYB	3.58808e-09	0.294477	0.114	0.041	0.000100251	0.459344	0.66346
HSPB1	4.01517e-09	-1.01171	0.109	0.185	0.000112184	1.59177	0.890505
EPS8L2	4.0154e-09	0.412757	0.263	0.157	0.00011219	0.996826	1.28293
RDH13	4.17972e-09	0.347917	0.152	0.068	0.000116781	0.564766	0.805924
DAPK2	4.59454e-09	0.4078	0.108	0.038	0.000128371	0.364171	0.646836
PKN2	5.09452e-09	0.290703	0.409	0.284	0.000142341	1.42502	1.62652
TACC1	5.14461e-09	0.327322	0.325	0.206	0.00014374	1.23785	1.46473
RPS6	5.28453e-09	-0.741642	0.133	0.208	0.00014765	1.28666	0.77259
TMPO	5.40068e-09	0.403629	0.207	0.114	0.000150895	0.76183	1.0416
AL627171.2	5.8463e-09	-0.591905	0.068	0.131	0.000163346	0.849705	0.439428
MAP2K6	6.05852e-09	0.484946	0.164	0.08	0.000169275	0.558381	0.89452
ARHGAP44	6.10292e-09	0.394862	0.137	0.058	0.000170516	0.532203	0.8059
MT-CO2	6.47971e-09	-0.426046	0.645	0.671	0.000181043	3.47399	3.17868
DOP1B	6.72337e-09	0.385712	0.111	0.041	0.000187851	0.390588	0.657943
CNST	7.20644e-09	0.399131	0.117	0.046	0.000201348	0.407351	0.684007
VSIG10	7.35419e-09	0.26199	0.131	0.054	0.000205476	0.524372	0.705969
TLN2	7.72839e-09	0.365978	0.23	0.131	0.000215931	0.891716	1.14539
LINC00472	7.74969e-09	-0.457621	0.28	0.381	0.000216526	2.09207	1.77487
PVT1	7.78909e-09	-0.633735	0.14	0.216	0.000217627	1.18614	0.746866
NUTM2A-AS1	8.09477e-09	0.320043	0.276	0.169	0.000226168	0.95879	1.18063
MT-CYB	8.3181e-09	-0.508777	0.626	0.645	0.000232408	3.44221	3.08955
EMP2	8.37325e-09	0.341645	0.121	0.047	0.000233949	0.439192	0.676002
MBTPS1	8.38618e-09	0.320247	0.24	0.138	0.00023431	0.910311	1.13229
HOXB9	8.49972e-09	0.308699	0.139	0.059	0.000237482	0.671069	0.885043
FOXP1	8.82239e-09	0.311041	0.451	0.328	0.000246498	1.65866	1.87425
DDX5	9.16547e-09	0.278796	0.71	0.578	0.000256083	2.40507	2.59832
HYDIN	9.36588e-09	-0.680852	0.08	0.144	0.000261683	1.01185	0.539921
GPS2	1.00476e-08	0.285148	0.178	0.089	0.000280731	0.727652	0.925301
SIRT7	1.01809e-08	0.379315	0.164	0.08	0.000284456	0.607498	0.870419
TACC2	1.02347e-08	0.324908	0.181	0.093	0.000285959	0.728413	0.953622
ST6GALNAC1	1.02881e-08	0.341775	0.113	0.042	0.000287448	0.513891	0.750791
HADHA	1.08882e-08	0.390008	0.178	0.09	0.000304216	0.632147	0.902481
AC026356.2	1.11112e-08	-0.507752	0.083	0.148	0.000310447	0.821889	0.469942
NABP1	1.1123e-08	-0.504445	0.24	0.329	0.000310776	1.66606	1.3164
LMO7	1.12404e-08	0.458704	0.214	0.118	0.000314056	0.871411	1.18936
GNPTAB	1.12611e-08	0.365563	0.151	0.069	0.000314635	0.554473	0.807862
AC009133.1	1.14472e-08	0.357581	0.144	0.064	0.000319836	0.60839	0.856246
TPCN1	1.233e-08	0.428073	0.13	0.056	0.0003445	0.436328	0.733045
KLF5	1.25543e-08	0.380302	0.273	0.169	0.000350767	1.01894	1.28255
NOSTRIN	1.51794e-08	0.22844	0.133	0.056	0.000424112	0.638931	0.797274
LGR4	1.57285e-08	0.407859	0.106	0.039	0.000439455	0.296912	0.579619
FBLIM1	1.71884e-08	0.358737	0.166	0.083	0.000480244	0.646886	0.895544
EPHX2	1.89525e-08	0.185502	0.227	0.125	0.000529533	1.07904	1.20762
NR2C1	1.90515e-08	0.303833	0.135	0.059	0.000532298	0.474256	0.684857
PFKL	1.91728e-08	0.384542	0.191	0.104	0.000535688	0.734405	1.00095
PAX8	2.09375e-08	-0.393605	0.33	0.433	0.000584995	2.30457	2.03175
MT-ND5	2.09411e-08	-0.602592	0.428	0.482	0.000585095	2.62041	2.20273
MAGI3	2.10826e-08	0.368146	0.13	0.056	0.000589048	0.473904	0.729083
HOXA11-AS	2.11832e-08	0.234338	0.102	0.035	0.000591858	0.465496	0.627926
IFI16	2.14679e-08	-0.754185	0.097	0.163	0.000599812	1.14354	0.620783
MCM7	2.14976e-08	0.435453	0.115	0.046	0.000600642	0.369896	0.671729
H2AFY	2.1567e-08	0.29161	0.353	0.237	0.000602582	1.30159	1.50371
MYO19	2.52126e-08	0.457028	0.201	0.113	0.000704441	0.730689	1.04748
UPF3A	2.58301e-08	0.382606	0.22	0.126	0.000721693	0.774974	1.04018
AC008735.2	2.62304e-08	0.267978	0.22	0.122	0.000732878	0.944672	1.13042
TSIX	2.65392e-08	0.320567	0.186	0.1	0.000741506	0.756238	0.978438
SGSM3	2.8279e-08	0.359141	0.156	0.076	0.000790115	0.60243	0.851368
MAN2C1	3.04694e-08	0.35933	0.167	0.084	0.000851316	0.644816	0.893885
SCNN1A	3.15453e-08	0.334248	0.228	0.132	0.000881376	0.882852	1.11454
EXOSC8	3.17495e-08	0.346478	0.12	0.05	0.00088708	0.36865	0.608811
TM9SF3	3.2494e-08	0.250748	0.295	0.185	0.000907884	1.1065	1.28031
RGMB	3.26358e-08	0.358803	0.117	0.047	0.000911844	0.52079	0.769493
C15orf48	3.55382e-08	0.163365	0.145	0.066	0.000992938	0.751498	0.864734
UCKL1	3.6179e-08	0.321574	0.16	0.079	0.00101084	0.605445	0.828343
ZNF704	3.70374e-08	0.38146	0.182	0.097	0.00103482	0.628199	0.892607
ICA1	4.06747e-08	0.472817	0.169	0.088	0.00113645	0.579229	0.906961
KIAA0355	4.21641e-08	0.403778	0.211	0.121	0.00117806	0.722383	1.00226
QPRT	4.30589e-08	0.259318	0.108	0.042	0.00120307	0.437619	0.617365
VPS36	4.62975e-08	0.264563	0.242	0.144	0.00129355	0.921827	1.10521
AF117829.1	4.86567e-08	-0.588632	0.198	0.279	0.00135947	1.52744	1.11944
TM2D1	5.13782e-08	0.353804	0.138	0.066	0.00143551	0.439744	0.684982
EMX2	5.17289e-08	-0.514898	0.086	0.149	0.00144531	0.94968	0.59278
PPIP5K2	5.73322e-08	0.315647	0.211	0.122	0.00160186	0.796424	1.01521
LGALS3	5.75446e-08	0.393606	0.197	0.11	0.0016078	0.750174	1.023
PCDH7	5.75663e-08	-0.549205	0.14	0.215	0.0016084	1.24588	0.865198
KCNQ1OT1	5.80442e-08	0.265599	0.649	0.522	0.00162176	2.7186	2.9027
DGAT1	5.86512e-08	0.371784	0.146	0.071	0.00163871	0.591541	0.849242
GBA2	5.9776e-08	0.330365	0.188	0.101	0.00167014	0.746936	0.975927
HSPH1	5.99311e-08	-1.84246	0.171	0.242	0.00167448	2.26406	0.986964
MYSM1	6.02096e-08	0.278835	0.277	0.176	0.00168226	1.04614	1.23942
EPS8	6.10334e-08	0.303224	0.203	0.115	0.00170527	0.80832	1.0185
DUS1L	6.49524e-08	0.344651	0.146	0.072	0.00181477	0.530433	0.769327
SYNC	6.94812e-08	0.456296	0.11	0.046	0.0019413	0.259133	0.575413
CALCOCO2	6.99867e-08	0.352569	0.142	0.067	0.00195543	0.541331	0.785713
ACSS2	7.0346e-08	0.232603	0.142	0.067	0.00196547	0.65604	0.817268
GAK	7.0682e-08	0.257216	0.247	0.148	0.00197486	1.0464	1.22469
ZDHHC23	7.36143e-08	0.332503	0.127	0.056	0.00205678	0.440324	0.670798
ITGA6	7.59241e-08	0.258603	0.262	0.164	0.00212132	1.12286	1.30211
SEMA6A	8.32278e-08	0.394073	0.13	0.06	0.00232539	0.495341	0.768492
ARHGEF10L	8.35541e-08	0.357855	0.11	0.045	0.0023345	0.427944	0.67599
FLNB	8.40272e-08	0.310825	0.284	0.178	0.00234772	1.11172	1.32717
NRDC	8.55129e-08	0.286486	0.286	0.181	0.00238923	1.09299	1.29156
COL27A1	8.56268e-08	-0.461938	0.121	0.193	0.00239241	1.15005	0.829862
PAX8-AS1	9.22291e-08	0.225421	0.221	0.127	0.00257688	0.992067	1.14832
IDH1	9.97896e-08	0.42875	0.101	0.039	0.00278812	0.265743	0.56293
EZH2	1.00534e-07	0.317031	0.115	0.048	0.00280892	0.486398	0.706147
FBXO25	1.02901e-07	0.261584	0.153	0.076	0.00287505	0.640769	0.822085
PTPRF	1.04458e-07	0.297479	0.236	0.143	0.00291855	0.922293	1.12849
NECTIN3	1.0686e-07	0.220448	0.13	0.059	0.00298566	0.54108	0.693883
DENND1B	1.08075e-07	0.336149	0.109	0.045	0.00301963	0.331168	0.564169
ZRANB2	1.08634e-07	0.232472	0.685	0.553	0.00303524	2.32177	2.48291
ACBD6	1.20692e-07	0.407876	0.168	0.09	0.00337213	0.576249	0.858967
MTUS1	1.21726e-07	0.250661	0.233	0.139	0.00340102	0.972913	1.14666
JUN	1.23094e-07	0.252178	0.313	0.207	0.00343926	1.41415	1.58895
AATK	1.29541e-07	0.522523	0.137	0.067	0.00361937	0.523112	0.885297
SEPTIN2	1.41981e-07	0.300159	0.251	0.155	0.00396695	0.902212	1.11027
CDK5RAP3	1.46424e-07	0.298774	0.24	0.145	0.00409109	0.944492	1.15159
SHROOM3	1.52342e-07	0.317413	0.191	0.109	0.00425644	0.733343	0.953358
GOLIM4	1.52782e-07	0.310793	0.149	0.075	0.00426873	0.641338	0.856764
SCN9A	1.70726e-07	0.233785	0.121	0.052	0.00477009	0.539518	0.701565
AC005261.1	1.78225e-07	-0.616369	0.114	0.178	0.00497962	1.02841	0.601174
TCF25	1.83133e-07	0.187807	0.691	0.536	0.00511673	2.31242	2.4426
PPIE	1.84642e-07	0.278714	0.128	0.059	0.00515889	0.478246	0.671436
DHDDS	1.88953e-07	0.27017	0.112	0.047	0.00527935	0.438699	0.625967
FAT1	1.89262e-07	0.238187	0.24	0.145	0.00528797	0.981908	1.14701
PILRB	2.07373e-07	0.244279	0.344	0.239	0.00579399	1.27701	1.44633
RPS27L	2.12221e-07	0.0388746	0.149	0.073	0.00592945	0.737107	0.764053
HMGN2	2.21781e-07	0.188011	0.163	0.085	0.00619656	0.692307	0.822627
AKR1A1	2.27058e-07	0.278324	0.143	0.072	0.00634401	0.546704	0.739624
PEX1	2.37349e-07	0.339882	0.146	0.073	0.00663153	0.51162	0.747209
AL022323.4	2.39746e-07	0.427856	0.157	0.083	0.0066985	0.586592	0.883159
RAB11FIP1	2.66841e-07	0.324372	0.255	0.161	0.00745553	1.02568	1.25051
NBEAL1	2.68291e-07	0.311611	0.316	0.218	0.00749605	1.19301	1.409
CENPC	2.6871e-07	0.338823	0.19	0.11	0.00750777	0.717704	0.952558
TARBP1	2.69091e-07	0.308754	0.247	0.157	0.0075184	0.967326	1.18134
CHD9	2.72523e-07	0.246074	0.4	0.284	0.00761429	1.46251	1.63307
MICAL3	2.76321e-07	0.331169	0.288	0.19	0.00772042	1.10497	1.33452
ORMDL1	2.82509e-07	0.231222	0.215	0.127	0.0078933	0.816515	0.976786
TXNIP	2.90146e-07	0.324555	0.275	0.181	0.00810669	1.23437	1.45934
TSHZ2	3.04331e-07	-0.830021	0.137	0.201	0.008503	1.36234	0.787009
ECHDC2	3.1787e-07	0.219003	0.331	0.223	0.00888129	1.273	1.4248
ACADVL	3.19864e-07	0.283611	0.314	0.211	0.00893699	1.24348	1.44006
FASTKD1	3.22216e-07	0.216152	0.104	0.043	0.00900271	0.413431	0.563256
OSMR	3.22711e-07	-0.56481	0.061	0.111	0.00901654	0.758447	0.366951
LINC00963	3.3441e-07	-0.679138	0.121	0.186	0.00934341	1.23777	0.767032
KIAA1522	3.3529e-07	0.323725	0.126	0.06	0.00936801	0.491079	0.715468
PLEKHJ1	3.41748e-07	0.284434	0.103	0.043	0.00954843	0.348491	0.545645
MARVELD3	3.50124e-07	0.430463	0.134	0.067	0.00978247	0.462212	0.760586
SH3D19	3.51233e-07	0.201631	0.197	0.113	0.00981344	0.842988	0.982748
RAD9A	3.57548e-07	0.321754	0.13	0.063	0.00998989	0.496827	0.71985
ARHGEF40	3.59128e-07	0.36725	0.117	0.054	0.010034	0.448597	0.703156
METTL17	3.61087e-07	0.30941	0.136	0.067	0.0100888	0.508716	0.723183
FN3K	3.74024e-07	0.343706	0.146	0.075	0.0104502	0.518342	0.756581
GPATCH2	3.81211e-07	0.235306	0.253	0.159	0.010651	0.968361	1.13146
CIITA	3.96049e-07	-0.496071	0.085	0.143	0.0110656	0.878851	0.535001
AKAP9	3.96185e-07	0.138773	0.668	0.516	0.0110694	2.39199	2.48818
TBC1D22A	4.06749e-07	0.32695	0.148	0.076	0.0113646	0.559732	0.786357
ITPRID2	4.14193e-07	0.283149	0.235	0.145	0.0115725	0.945455	1.14172
TPP2	4.31317e-07	0.19624	0.202	0.119	0.012051	0.86799	1.00401
KCNC3	4.46929e-07	-0.382622	0.116	0.183	0.0124872	1.03458	0.769371
TTC17	4.74182e-07	0.230278	0.309	0.207	0.0132486	1.17478	1.3344
CDYL	4.75795e-07	0.265241	0.148	0.077	0.0132937	0.583236	0.767087
C1orf131	4.94271e-07	0.281358	0.147	0.076	0.0138099	0.607037	0.80206
RABGAP1	5.07043e-07	0.263854	0.237	0.148	0.0141668	0.964631	1.14752
ATP1B1	5.2327e-07	0.304771	0.16	0.087	0.0146202	0.612586	0.823837
TTF2	5.33206e-07	0.374044	0.126	0.06	0.0148978	0.468915	0.728183
CTNND1	5.33882e-07	0.0920795	0.373	0.257	0.0149167	1.46856	1.53239
KATNBL1	5.50779e-07	0.252731	0.207	0.123	0.0153888	0.795679	0.970859
SERF2	5.51145e-07	0.213571	0.173	0.096	0.015399	0.70482	0.852856
ADAM9	5.59035e-07	-0.475148	0.089	0.147	0.0156194	0.847617	0.518269
GK5	5.70291e-07	0.246838	0.293	0.195	0.0159339	1.12695	1.29804
ADAT2	5.73518e-07	0.307864	0.136	0.068	0.0160241	0.498022	0.711417
MBOAT1	5.77498e-07	0.223846	0.125	0.059	0.0161353	0.519728	0.674886
HES1	5.86968e-07	0.55809	0.151	0.081	0.0163999	0.638857	1.0257
NBEAL2	6.08638e-07	0.263464	0.131	0.064	0.0170054	0.565583	0.748202
SMC4	6.09526e-07	0.293852	0.156	0.084	0.0170301	0.714818	0.9185
ASL	6.10635e-07	0.271538	0.224	0.138	0.0170611	0.935479	1.12369
PLAGL1	6.10656e-07	0.294525	0.168	0.093	0.0170617	0.663089	0.867239
ARHGAP12	6.18285e-07	0.346459	0.128	0.063	0.0172749	0.445072	0.685219
NKTR	6.28274e-07	0.218618	0.674	0.54	0.017554	2.29144	2.44297
MYO1D	6.57399e-07	0.268206	0.11	0.048	0.0183677	0.42519	0.611096
CAMK2D	6.59713e-07	0.280294	0.102	0.043	0.0184324	0.373024	0.567309
CDK10	6.72954e-07	0.239221	0.224	0.136	0.0188023	0.921966	1.08778
MT-ND1	7.01627e-07	-0.398651	0.494	0.549	0.0196035	2.80024	2.52392
AK1	7.17128e-07	0.228817	0.143	0.073	0.0200366	0.85678	1.01538
POLR2J3	7.25792e-07	0.218753	0.544	0.419	0.0202786	1.90112	2.05274
SELENOW	7.8806e-07	0.190952	0.272	0.177	0.0220184	1.10746	1.23982
LINC02614	8.06204e-07	0.351649	0.102	0.045	0.0225253	0.319142	0.562887
ATAD5	8.06561e-07	0.35713	0.103	0.045	0.0225353	0.443465	0.691008
PYGB	8.21092e-07	0.296211	0.106	0.047	0.0229413	0.409426	0.614744
SOD2	8.33935e-07	-0.412541	0.305	0.388	0.0233002	2.31388	2.02793
NME3	8.43064e-07	0.321422	0.128	0.063	0.0235552	0.49461	0.717403
WIPI1	8.67469e-07	0.377463	0.109	0.05	0.0242371	0.355824	0.617461
U2SURP	9.04761e-07	0.283975	0.342	0.237	0.025279	1.26614	1.46298
EIF4G2	9.06524e-07	0.250156	0.326	0.224	0.0253283	1.22514	1.39854
ACAA1	9.17677e-07	0.355024	0.106	0.047	0.0256399	0.382028	0.628112
BAIAP2L1	9.49204e-07	0.340053	0.141	0.073	0.0265208	0.540274	0.775981
IVNS1ABP	1.00504e-06	0.275691	0.263	0.17	0.0280809	1.04989	1.24098
HEPH	1.00671e-06	0.279565	0.102	0.043	0.0281275	0.448677	0.642457
PLEKHA5	1.03249e-06	0.291918	0.281	0.186	0.0288478	1.09844	1.30079
KIF13A	1.04951e-06	0.313742	0.124	0.06	0.0293234	0.494235	0.711705
GIPC1	1.07766e-06	0.295694	0.108	0.048	0.0301098	0.393588	0.598547
HSPA1A	1.09219e-06	-0.570444	0.086	0.143	0.0305157	1.08583	0.690429
FERMT1	1.12152e-06	0.337207	0.125	0.062	0.0313354	0.485978	0.719712
HSP90AB1	1.12699e-06	-0.825083	0.202	0.269	0.031488	1.65515	1.08325
ADCY6	1.15381e-06	0.236719	0.155	0.083	0.0322374	0.69438	0.858461
RCOR3	1.22001e-06	0.304259	0.16	0.089	0.0340871	0.582058	0.792954
CERS6	1.22874e-06	0.243871	0.106	0.047	0.034331	0.417194	0.586233
AFDN	1.25027e-06	0.20014	0.557	0.429	0.0349326	1.94357	2.0823
RER1	1.26841e-06	0.288091	0.158	0.088	0.0354393	0.63122	0.830909
KIN	1.29247e-06	0.320876	0.169	0.096	0.0361116	0.663398	0.885812
ESR1	1.30394e-06	-0.446397	0.158	0.227	0.036432	1.22936	0.919936
GMDS-DT	1.34542e-06	0.368282	0.195	0.119	0.0375909	0.710363	0.965637
ANO9	1.48696e-06	0.154756	0.127	0.062	0.0415455	0.623515	0.730784
MAP4K3-DT	1.52811e-06	0.219465	0.181	0.104	0.0426953	0.753893	0.906015
SH3RF2	1.53321e-06	0.180113	0.12	0.056	0.0428378	0.590564	0.715408
NPEPPS	1.53376e-06	0.183159	0.442	0.325	0.0428533	1.6027	1.72965
HELLS	1.53468e-06	0.369669	0.147	0.08	0.042879	0.78511	1.04135
GALE	1.55924e-06	0.348177	0.186	0.11	0.0435651	0.728396	0.969734
OFD1	1.58023e-06	0.218681	0.363	0.254	0.0441517	1.37233	1.52391
CWC25	1.64856e-06	0.283255	0.204	0.126	0.0460609	0.823468	1.01981
RHOBTB3	1.66882e-06	0.360873	0.141	0.076	0.0466269	0.548734	0.798872
ROCK2	1.71042e-06	0.304675	0.268	0.178	0.0477891	1.05462	1.26581
SEC23A	1.75799e-06	0.263229	0.164	0.093	0.0491182	0.617182	0.799638
