# Supplementary material for: Dienogest interrupts the chemokine signalling axis in endometriotic lesions with resistant signatures providing novel opportunities for personalised treatment.
Source: Research Square preprint supplement (doi:10.21203/rs.3.rs-8096027/v1), 2026-01-13
Supplement: Supplementary file 2 [file 25e4e51e81786f336ac9e323.xlsx]

## Sheet: Sheet1
Supplementary Table 8: DEG between responders and non-responders in lymphocytes
gene_ID	p_val	avg_log2FC	pct.1	pct.2	p_val_adj	mean_treated	mean_untreaded
CXCR4	3.43711e-120	-1.01248	0.265	0.526	9.60328e-116	2.3124	1.6106
HSP90AA1	5.22709e-104	-0.650509	0.496	0.714	1.46045e-99	3.56728	3.11639
PLCG2	6.006e-93	-0.739453	0.662	0.801	1.67808e-88	4.19238	3.67983
TSC22D3	2.72554e-85	-0.824078	0.308	0.538	7.61517e-81	2.41803	1.84682
TXNIP	2.66616e-80	-0.737797	0.396	0.603	7.44924e-76	2.67815	2.16675
DNAJB1	1.38879e-78	-0.766898	0.227	0.43	3.88029e-74	2.48274	1.95117
SMAP2	1.09643e-76	-0.754424	0.172	0.37	3.06342e-72	1.69394	1.17101
IGKC	2.66266e-74	-2.53565	0.125	0.303	7.43948e-70	3.72011	1.96254
CNOT6L	4.30095e-73	-0.775534	0.298	0.497	1.20169e-68	2.26614	1.72858
HSPH1	2.20703e-69	-0.634228	0.211	0.397	6.16645e-65	2.23789	1.79827
BTG1	8.5261e-66	-0.619948	0.489	0.67	2.38219e-61	2.79	2.36028
FKBP5	1.28226e-64	-0.652332	0.237	0.435	3.58264e-60	2.00884	1.55668
IGHG4	1.12106e-60	-3.33578	0.047	0.161	3.13224e-56	2.90925	0.597064
SMCHD1	3.08925e-60	-0.605936	0.497	0.678	8.63136e-56	2.75548	2.33547
GNLY	1.89991e-59	1.76195	0.323	0.168	5.30836e-55	2.26598	3.48727
HSPE1	7.69948e-57	-0.703695	0.129	0.278	2.15124e-52	1.64806	1.16029
HSPA1B	1.39616e-56	-0.488606	0.185	0.357	3.90088e-52	1.90885	1.57018
HSPA1A	4.13993e-55	-0.622832	0.193	0.355	1.1567e-50	2.29141	1.85969
BIRC3	9.83592e-52	-0.902546	0.183	0.334	2.74816e-47	1.9683	1.3427
CEMIP2	2.17016e-50	-0.621871	0.279	0.45	6.06342e-46	2.11002	1.67897
MT-CO1	1.49295e-48	0.634042	0.949	0.95	4.17129e-44	4.57173	5.01121
RPL17	2.67763e-47	-0.6988	0.232	0.389	7.4813e-43	1.86866	1.38429
ZFP36L2	7.64989e-47	-0.520042	0.539	0.692	2.13738e-42	2.87184	2.51138
LINC-PINT	1.7166e-46	-0.503617	0.323	0.496	4.79618e-42	2.12491	1.77583
TP53INP1	9.95361e-46	-0.81356	0.054	0.153	2.78104e-41	1.08843	0.52451
SARAF	1.73355e-45	-0.578906	0.28	0.443	4.84353e-41	1.97372	1.57246
RPL28	2.5295e-44	-0.655164	0.279	0.434	7.06744e-40	2.12218	1.66805
EEF1A1	5.65504e-44	-0.665159	0.392	0.551	1.58002e-39	2.59333	2.13227
HSPD1	4.68821e-43	-0.54782	0.208	0.351	1.30988e-38	1.86643	1.48671
RPL13A	3.23247e-42	-0.679678	0.253	0.402	9.03151e-38	2.00544	1.53432
PPP2R5C	2.13028e-39	-0.506801	0.337	0.494	5.95201e-35	2.13423	1.78295
CRYBG1	5.29679e-39	-0.552703	0.2	0.339	1.47992e-34	1.73637	1.35326
RPL13	1.04512e-38	-0.662564	0.355	0.5	2.92005e-34	2.45715	1.99789
RPS26	1.55908e-38	-0.710682	0.177	0.305	4.35608e-34	1.63796	1.14535
SESN3	1.56334e-38	-0.808976	0.084	0.185	4.36796e-34	1.27433	0.713591
HERPUD1	3.99014e-38	-0.68221	0.134	0.254	1.11484e-33	1.47288	1.00001
AC016831.5	7.34944e-38	-0.592658	0.155	0.279	2.05343e-33	1.47103	1.06023
RPL3	9.80942e-37	-0.642252	0.199	0.328	2.74075e-32	1.67832	1.23315
RPS8	2.17336e-36	-0.546994	0.243	0.382	6.07236e-32	1.89241	1.51326
RPS29	5.3017e-36	-0.599866	0.204	0.338	1.4813e-31	1.81308	1.39728
RPS6	1.13869e-35	-0.658893	0.201	0.331	3.18149e-31	1.84569	1.38898
FAM118A	1.82144e-35	-0.525229	0.185	0.314	5.08909e-31	1.54921	1.18515
SRGN	1.07645e-34	-0.540399	0.246	0.385	3.0076e-30	1.86024	1.48566
RPL9	3.00589e-34	-0.546049	0.175	0.297	8.39846e-30	1.55782	1.17933
RPL39	6.49132e-34	-0.645449	0.193	0.316	1.81367e-29	1.74137	1.29398
MS4A1	1.32851e-33	-1.0458	0.053	0.132	3.71187e-29	1.48117	0.756277
CCNH	2.05636e-33	-0.524302	0.134	0.247	5.74546e-29	1.29833	0.934909
CHORDC1	8.05108e-33	-0.53847	0.142	0.253	2.24947e-28	1.33547	0.962234
HSPB1	1.12297e-32	-0.580552	0.078	0.17	3.13757e-28	1.10446	0.70205
STK4	1.26923e-32	-0.429056	0.419	0.567	3.54624e-28	2.2947	1.9973
PTMA	5.03817e-32	-0.37582	0.424	0.58	1.40767e-27	2.43398	2.17348
CACYBP	5.67272e-32	-0.470931	0.057	0.138	1.58496e-27	0.809824	0.4834
TNFAIP3	9.06623e-32	-0.499407	0.291	0.426	2.53311e-27	2.04454	1.69838
DUSP4	1.40078e-31	-0.695396	0.056	0.135	3.91378e-27	1.02436	0.542346
RPS27A	1.77334e-31	-0.537289	0.206	0.33	4.95472e-27	1.69228	1.31986
ITGAX	6.74753e-31	1.15784	0.145	0.063	1.88526e-26	0.676638	1.47919
IKZF3	9.69079e-31	-0.465021	0.278	0.413	2.70761e-26	1.95689	1.63456
RPS27	1.18227e-30	-0.596531	0.243	0.371	3.30327e-26	1.97111	1.55763
DNAJA1	1.98808e-30	-0.448719	0.121	0.225	5.55469e-26	1.20909	0.898059
BANK1	2.12769e-30	-0.677215	0.036	0.102	5.94475e-26	0.931327	0.461918
HSPA8	3.07276e-30	-0.435512	0.163	0.276	8.58529e-26	1.46068	1.1588
RPS16	8.18522e-30	-0.564369	0.156	0.264	2.28695e-25	1.41001	1.01882
RPS18	1.14435e-29	-0.614445	0.181	0.294	3.19732e-25	1.61349	1.18759
PFKFB3	2.34591e-29	-0.544732	0.089	0.179	6.55448e-25	1.10263	0.725046
SC5D	2.45103e-29	-0.553361	0.098	0.191	6.84818e-25	1.2236	0.840042
RPS2	2.61698e-29	-0.489199	0.224	0.345	7.31183e-25	1.69788	1.35879
ARID5B	3.13624e-29	-0.431856	0.177	0.294	8.76266e-25	1.50568	1.20634
B2M	3.13657e-29	-0.289779	0.658	0.775	8.76358e-25	3.09101	2.89015
YWHAB	4.38285e-29	-0.439192	0.248	0.374	1.22457e-24	1.74586	1.44144
ISG20	5.93943e-29	-0.419198	0.052	0.127	1.65948e-24	0.746164	0.455598
GPR171	7.75752e-29	-0.62126	0.134	0.233	2.16745e-24	1.42248	0.991854
TPT1	1.47941e-28	-0.493113	0.29	0.42	4.13347e-24	2.0734	1.7316
RPS7	3.12137e-28	-0.471479	0.187	0.303	8.72111e-24	1.51676	1.18996
OAZ1	7.52661e-28	-0.436928	0.117	0.214	2.10293e-23	1.08337	0.780509
MEF2C	8.60708e-28	-0.528919	0.043	0.11	2.40482e-23	0.886865	0.520246
RPL21	5.67022e-27	-0.643258	0.189	0.295	1.58426e-22	1.729	1.28312
RPS3A	2.3e-26	-0.545427	0.194	0.302	6.42619e-22	1.62613	1.24807
PAG1	2.8474e-26	-0.486938	0.134	0.231	7.95563e-22	1.25598	0.918463
RPLP0	1.48403e-25	-0.464186	0.123	0.216	4.14637e-21	1.16141	0.839657
ELF1	1.88749e-25	-0.409884	0.159	0.261	5.27364e-21	1.30222	1.01811
LAPTM5	1.96903e-25	-0.445047	0.112	0.201	5.50146e-21	1.08292	0.774437
RPL32	4.07142e-25	-0.552823	0.2	0.305	1.13756e-20	1.75032	1.36714
KLRC1	4.08223e-25	0.851228	0.156	0.078	1.14058e-20	0.893524	1.48355
ST6GAL1	4.15012e-25	-0.48427	0.055	0.122	1.15954e-20	0.725895	0.390224
RPS12	4.93852e-25	-0.579497	0.191	0.296	1.37982e-20	1.72947	1.32779
PPP1R15A	7.49022e-25	-0.42662	0.091	0.174	2.09277e-20	1.10122	0.805508
UBC	8.56718e-25	-0.280158	0.211	0.318	2.39367e-20	1.73952	1.54532
ATXN1	1.15041e-24	-0.444238	0.193	0.302	3.21426e-20	1.53057	1.22265
SNHG14	1.3118e-24	-0.347346	0.243	0.363	3.66518e-20	1.72685	1.48609
CELF2	1.90477e-24	-0.403455	0.379	0.499	5.32193e-20	2.21493	1.93528
DUSP1	3.35947e-24	-0.357349	0.196	0.308	9.38635e-20	1.59933	1.35163
GLIPR1	4.70577e-24	-0.435315	0.127	0.218	1.31479e-19	1.20835	0.906614
TENT5C	5.53505e-24	-0.507631	0.142	0.234	1.54649e-19	1.36113	1.00926
EZR	9.05528e-24	-0.398639	0.128	0.22	2.53004e-19	1.23761	0.961294
JMY	1.30521e-23	-0.416086	0.062	0.132	3.64677e-19	0.824497	0.536089
RPL36	1.30717e-23	-0.511002	0.156	0.249	3.65223e-19	1.43149	1.07729
EEF2	1.40424e-23	-0.434764	0.134	0.225	3.92345e-19	1.18523	0.883872
CD74	1.42146e-23	-0.613814	0.135	0.223	3.97156e-19	1.48565	1.06019
RPS10	1.6664e-23	-0.481787	0.072	0.143	4.65592e-19	0.84702	0.513071
SAMD3	2.24929e-23	0.740065	0.212	0.13	6.28451e-19	0.896369	1.40934
ETS1	2.55382e-23	-0.342963	0.566	0.66	7.13536e-19	2.80097	2.56325
MT-ATP6	2.70746e-23	0.528057	0.913	0.929	7.56464e-19	4.23396	4.59998
FCMR	3.95972e-23	-0.42351	0.07	0.141	1.10635e-18	0.856217	0.562663
BCL2L11	8.27824e-23	-0.428052	0.065	0.134	2.31294e-18	0.860333	0.56363
MCL1	1.03146e-22	-0.360088	0.305	0.425	2.8819e-18	1.93974	1.69014
KLF2	1.34571e-22	-0.488175	0.084	0.159	3.75992e-18	1.06316	0.724781
PRKCB	1.62558e-22	-0.421273	0.116	0.201	4.54187e-18	1.13803	0.846025
ELL2	1.6864e-22	-0.440446	0.105	0.188	4.71181e-18	1.14962	0.844322
KLHL6	2.35658e-22	-0.485786	0.084	0.159	6.5843e-18	1.02691	0.690187
RPS23	3.07948e-22	-0.462238	0.171	0.266	8.60407e-18	1.5149	1.1945
MALT1	3.4855e-22	-0.383172	0.122	0.21	9.73848e-18	1.16529	0.899693
RPS5	4.80466e-22	-0.438824	0.081	0.153	1.34242e-17	0.883625	0.579456
RPS15	5.5922e-22	-0.476206	0.168	0.261	1.56246e-17	1.42241	1.09233
RPL34	5.98257e-22	-0.539823	0.222	0.322	1.67153e-17	1.82267	1.4485
CIITA	6.36076e-22	-0.495476	0.043	0.1	1.7772e-17	0.788558	0.44512
BTG2	7.55866e-22	-0.464099	0.189	0.285	2.11189e-17	1.54693	1.22524
SLC5A3	7.91728e-22	-0.430337	0.139	0.227	2.21209e-17	1.26682	0.968533
RPL18A	8.62094e-22	-0.478133	0.149	0.238	2.40869e-17	1.3428	1.01138
RPL37	8.94628e-22	-0.402839	0.208	0.312	2.49959e-17	1.6152	1.33598
MAP3K1	2.2941e-21	-0.343879	0.061	0.126	6.40972e-17	0.74299	0.504631
RPL26	2.40746e-21	-0.442581	0.154	0.244	6.72643e-17	1.38211	1.07534
PRDM1	3.25824e-21	-0.377393	0.171	0.266	9.10351e-17	1.45752	1.19593
RPL18	3.90696e-21	-0.388337	0.163	0.256	1.0916e-16	1.31929	1.05012
RPS15A	4.57232e-21	-0.472378	0.203	0.301	1.27751e-16	1.57874	1.25131
RPS11	4.61839e-21	-0.443381	0.118	0.199	1.29038e-16	1.1268	0.819468
RPLP2	5.75962e-21	-0.567556	0.186	0.279	1.60924e-16	1.67821	1.28481
PPP1CB	6.01737e-21	-0.40725	0.162	0.254	1.68125e-16	1.31486	1.03258
RAPGEF1	6.6674e-21	-0.341002	0.114	0.197	1.86287e-16	1.07735	0.84099
ADAM28	7.10876e-21	-0.450356	0.048	0.107	1.98619e-16	0.825735	0.513572
RPL11	7.1573e-21	-0.442084	0.245	0.348	1.99975e-16	1.80983	1.5034
RPL27	8.15943e-21	-0.389663	0.08	0.15	2.27974e-16	0.862733	0.592639
RPL4	1.07944e-20	-0.459567	0.102	0.178	3.01595e-16	1.07028	0.751735
RPS20	1.12555e-20	-0.519663	0.129	0.21	3.1448e-16	1.27767	0.917464
RPS28	1.56983e-20	-0.443852	0.272	0.376	4.38611e-16	1.91588	1.60823
DNAJB6	1.66325e-20	-0.343012	0.19	0.287	4.64712e-16	1.44969	1.21193
RPL19	2.11927e-20	-0.456519	0.163	0.255	5.92123e-16	1.4377	1.12127
SSH2	3.51022e-20	-0.369128	0.124	0.207	9.80756e-16	1.13326	0.877397
PDE3B	3.9625e-20	-0.401124	0.232	0.332	1.10712e-15	1.73877	1.46073
NCAM1	4.27184e-20	0.801521	0.104	0.047	1.19355e-15	0.446903	1.00247
HLA-DRA	5.08669e-20	-0.528385	0.063	0.124	1.42122e-15	0.960471	0.594222
SRGAP3	5.15905e-20	0.933448	0.152	0.086	1.44144e-15	0.690543	1.33756
PNRC1	5.63745e-20	-0.306668	0.204	0.306	1.5751e-15	1.43376	1.22119
CD55	7.90538e-20	-0.337452	0.123	0.206	2.20876e-15	1.15193	0.91803
EMB	8.3188e-20	-0.319897	0.232	0.336	2.32427e-15	1.58608	1.36435
MT-CO2	9.09194e-20	0.470845	0.898	0.916	2.54029e-15	4.0649	4.39126
RPS25	1.22502e-19	-0.455332	0.172	0.261	3.42272e-15	1.44891	1.1333
RPL5	1.52062e-19	-0.36468	0.208	0.306	4.2486e-15	1.53627	1.28349
SLC38A1	1.79892e-19	-0.323876	0.27	0.374	5.02618e-15	1.73093	1.50644
CDKN1B	2.16555e-19	-0.368518	0.108	0.184	6.05056e-15	1.01521	0.759774
UHMK1	2.5825e-19	-0.319314	0.088	0.158	7.21551e-15	0.861401	0.64007
RPL10	2.69096e-19	-0.383292	0.287	0.391	7.51854e-15	1.92169	1.65601
HECA	2.83853e-19	-0.339815	0.12	0.199	7.93086e-15	1.06604	0.830499
RPLP1	3.11803e-19	-0.389224	0.305	0.414	8.71177e-15	2.0529	1.78311
RPL23A	3.20253e-19	-0.441867	0.132	0.213	8.94787e-15	1.23948	0.933201
RPL30	4.22963e-19	-0.401392	0.187	0.278	1.18176e-14	1.48569	1.20747
NAA50	5.15886e-19	-0.362575	0.076	0.142	1.44138e-14	0.842681	0.591363
LEPROTL1	5.20229e-19	-0.425417	0.123	0.2	1.45352e-14	1.11021	0.81533
RPL7	5.44112e-19	-0.459809	0.129	0.208	1.52025e-14	1.21579	0.897075
RPS19	6.50396e-19	-0.368246	0.243	0.343	1.81721e-14	1.74238	1.48713
RPS13	8.88485e-19	-0.438743	0.109	0.181	2.48243e-14	1.07934	0.775231
HSP90AB1	9.5411e-19	-0.244579	0.209	0.308	2.66578e-14	1.56387	1.39434
RPL24	9.8172e-19	-0.478886	0.119	0.194	2.74293e-14	1.16254	0.830607
RPL15	1.13461e-18	-0.396791	0.129	0.207	3.17011e-14	1.1113	0.83626
IL7R	1.34557e-18	-0.560913	0.404	0.484	3.75953e-14	3.01485	2.62606
RNF19A	1.45371e-18	-0.285205	0.361	0.47	4.06166e-14	2.09569	1.898
RPS3	1.47731e-18	-0.437686	0.171	0.256	4.1276e-14	1.40106	1.09767
SLFN5	1.54118e-18	-0.448727	0.222	0.31	4.30606e-14	1.71053	1.39949
RPL27A	1.66214e-18	-0.500232	0.126	0.202	4.64401e-14	1.21494	0.868204
IL6ST	2.19335e-18	-0.305629	0.14	0.224	6.12823e-14	1.238	1.02616
GNAS	2.20538e-18	-0.309365	0.269	0.373	6.16184e-14	1.73357	1.51914
NIBAN1	2.48869e-18	-0.313318	0.173	0.263	6.95339e-14	1.44225	1.22507
LPIN1	2.84531e-18	-0.271925	0.197	0.297	7.94981e-14	1.49364	1.30516
MIAT	3.85715e-18	-0.32868	0.136	0.217	1.07769e-13	1.33434	1.10652
KLHL24	4.54875e-18	-0.311869	0.096	0.167	1.27092e-13	0.914209	0.698038
ERAP2	6.8315e-18	-0.321891	0.139	0.219	1.90872e-13	1.20809	0.984969
INPP5D	7.45823e-18	-0.301005	0.22	0.316	2.08383e-13	1.56893	1.36029
VPS37B	7.62846e-18	-0.332897	0.164	0.25	2.13139e-13	1.41793	1.18719
RPL35	8.80548e-18	-0.378232	0.156	0.238	2.46025e-13	1.33682	1.07465
FAM107B	1.14353e-17	-0.33053	0.122	0.198	3.19504e-13	1.10651	0.877401
IPCEF1	1.38783e-17	-0.35502	0.131	0.207	3.8776e-13	1.22832	0.982239
KLF6	1.62562e-17	-0.394009	0.345	0.449	4.54198e-13	2.20047	1.92736
CYBA	1.64829e-17	-0.293161	0.134	0.214	4.60531e-13	1.11136	0.908156
RPL41	2.01007e-17	-0.356599	0.347	0.453	5.61613e-13	2.11724	1.87006
RNASET2	2.49818e-17	-0.30484	0.103	0.174	6.97992e-13	0.991921	0.780622
PDE4B	2.58502e-17	-0.236764	0.175	0.265	7.22255e-13	1.34382	1.17971
SLC4A7	2.83358e-17	-0.309195	0.244	0.34	7.91702e-13	1.66745	1.45314
MYH9	2.94112e-17	-0.323717	0.229	0.322	8.2175e-13	1.54773	1.32335
UBE2B	3.25728e-17	-0.315416	0.102	0.172	9.10085e-13	0.963351	0.744722
FAU	3.39642e-17	-0.322318	0.135	0.213	9.4896e-13	1.16601	0.9426
RPL6	3.63284e-17	-0.396675	0.255	0.348	1.01502e-12	1.79168	1.51673
RPL7A	4.13715e-17	-0.392264	0.183	0.268	1.15592e-12	1.40887	1.13698
PIK3IP1	5.80163e-17	-0.349933	0.126	0.201	1.62098e-12	1.13107	0.888519
TAGAP	6.57268e-17	-0.330259	0.062	0.118	1.83641e-12	0.728452	0.499534
ZC3HAV1	6.62444e-17	-0.309738	0.203	0.293	1.85087e-12	1.46227	1.24758
ST13	7.44377e-17	-0.305147	0.058	0.113	2.07979e-12	0.691039	0.479527
DDX3X	7.63573e-17	-0.281961	0.341	0.447	2.13342e-12	1.97744	1.782
FOXP1	8.0334e-17	-0.27828	0.361	0.465	2.24453e-12	2.06887	1.87598
RPS17	8.86463e-17	-0.403983	0.088	0.151	2.47678e-12	0.939901	0.659881
EEF1D	9.84349e-17	-0.33608	0.155	0.236	2.75027e-12	1.25493	1.02198
MSI2	1.32551e-16	-0.286055	0.205	0.297	3.70347e-12	1.44607	1.24779
NABP1	1.65392e-16	-0.406905	0.243	0.333	4.62106e-12	1.73779	1.45574
EVI2B	1.6606e-16	-0.324122	0.07	0.129	4.63971e-12	0.76285	0.538186
RPS14	1.72904e-16	-0.395149	0.188	0.274	4.83094e-12	1.49331	1.21941
NCOA3	1.7728e-16	-0.309945	0.121	0.194	4.95319e-12	1.05093	0.836088
ATP5F1E	2.64571e-16	-0.264409	0.144	0.224	7.39212e-12	1.23068	1.04741
TNRC6B	2.81582e-16	-0.272577	0.367	0.472	7.8674e-12	2.04342	1.85448
ATM	3.41609e-16	-0.245856	0.409	0.525	9.54456e-12	2.17903	2.00862
RALGPS2	3.56448e-16	-0.402703	0.072	0.129	9.95916e-12	1.00096	0.721828
STK17B	3.79463e-16	-0.213726	0.292	0.4	1.06022e-11	1.74232	1.59418
POU2F2	3.8692e-16	-0.376044	0.083	0.145	1.08106e-11	1.03607	0.775411
RGS1	4.31123e-16	-0.33821	0.209	0.296	1.20456e-11	1.74381	1.50938
NUDT4	4.82311e-16	-0.305982	0.05	0.1	1.34758e-11	0.641977	0.429886
NUFIP2	4.94467e-16	-0.306509	0.185	0.27	1.38154e-11	1.3394	1.12694
PTGES3	6.55413e-16	-0.256307	0.122	0.195	1.83122e-11	1.03254	0.854886
CD84	7.88202e-16	-0.454592	0.129	0.198	2.20224e-11	1.2865	0.971403
CYTIP	8.77466e-16	-0.297898	0.165	0.245	2.45164e-11	1.2668	1.06031
AL365361.1	9.101e-16	-0.298992	0.05	0.1	2.54282e-11	0.621348	0.414102
NCK2	1.09075e-15	-0.292567	0.108	0.176	3.04755e-11	0.990477	0.787685
PPP1R10	1.18329e-15	-0.267945	0.115	0.184	3.3061e-11	0.993159	0.807433
UBA52	1.57559e-15	-0.404176	0.104	0.168	4.40219e-11	1.05094	0.770786
ELOVL5	1.841e-15	-0.267393	0.072	0.129	5.14376e-11	0.754093	0.568751
CCDC50	2.05879e-15	-0.314454	0.056	0.107	5.75227e-11	0.685664	0.467702
SP110	2.59744e-15	-0.332418	0.122	0.191	7.25724e-11	1.1291	0.898685
NOP53	2.84459e-15	-0.35755	0.068	0.122	7.94778e-11	0.775494	0.527659
ZNF831	3.29909e-15	-0.354172	0.073	0.129	9.21766e-11	0.86554	0.620046
RPL14	3.88085e-15	-0.322135	0.177	0.256	1.08431e-10	1.35195	1.12867
ATF7IP	4.10958e-15	-0.251532	0.332	0.436	1.14822e-10	1.90519	1.73084
FOXO1	4.57535e-15	-0.320974	0.109	0.174	1.27835e-10	1.0168	0.794314
ARRDC3	6.17044e-15	-0.288746	0.081	0.139	1.72402e-10	0.824873	0.62473
MT-ND4	6.47347e-15	0.395005	0.877	0.905	1.80869e-10	3.87777	4.15156
YPEL5	7.45009e-15	-0.304549	0.079	0.136	2.08155e-10	0.861047	0.649949
MAP3K2	8.42691e-15	-0.291321	0.124	0.193	2.35448e-10	1.06095	0.859019
RPSA	8.84667e-15	-0.301571	0.17	0.247	2.47176e-10	1.29176	1.08273
RPL29	1.02982e-14	-0.353813	0.102	0.165	2.87731e-10	1.01028	0.765036
RPL8	1.04396e-14	-0.317706	0.152	0.226	2.91682e-10	1.23609	1.01587
RPS4X	1.06856e-14	-0.394739	0.159	0.233	2.98555e-10	1.36726	1.09365
EIF5	1.12769e-14	-0.21467	0.161	0.241	3.15076e-10	1.20379	1.055
ITK	1.13129e-14	-0.291154	0.238	0.324	3.16082e-10	1.65025	1.44843
RPL22	1.55025e-14	-0.343887	0.144	0.215	4.33139e-10	1.24619	1.00783
SLC7A5	1.93793e-14	-0.298967	0.068	0.121	5.41458e-10	0.766723	0.559495
CREM	2.47587e-14	-0.326467	0.169	0.245	6.91757e-10	1.34625	1.11996
PPP1R2	2.67205e-14	-0.327599	0.14	0.21	7.46571e-10	1.19609	0.969018
SYAP1	2.8951e-14	-0.206972	0.173	0.255	8.08892e-10	1.37248	1.22902
PHC3	3.00278e-14	-0.262181	0.193	0.276	8.38976e-10	1.34772	1.16599
AC005261.1	3.01995e-14	-0.291367	0.077	0.132	8.43773e-10	0.812727	0.610767
SPOCK2	3.10534e-14	-0.378685	0.159	0.229	8.67631e-10	1.29549	1.03301
CD37	3.27247e-14	-0.335595	0.12	0.186	9.14328e-10	1.09957	0.866957
OSBPL8	3.92256e-14	-0.277312	0.123	0.189	1.09596e-09	1.05677	0.864555
REL	4.15377e-14	-0.315046	0.242	0.323	1.16056e-09	1.62597	1.40759
GPR183	4.24902e-14	-0.324635	0.077	0.131	1.18718e-09	0.852875	0.627855
KLF9	4.70957e-14	-0.26212	0.079	0.135	1.31585e-09	0.824456	0.642768
NKG7	4.77671e-14	0.67547	0.134	0.081	1.33461e-09	0.667941	1.13614
P2RY10	5.17179e-14	-0.291395	0.082	0.138	1.445e-09	0.815965	0.613985
FAM177A1	5.25649e-14	-0.272909	0.141	0.212	1.46866e-09	1.21123	1.02207
HLA-E	6.04875e-14	-0.20271	0.431	0.537	1.69002e-09	2.1669	2.02639
TSPYL2	6.1784e-14	-0.313269	0.129	0.196	1.72624e-09	1.26391	1.04677
RPL38	8.04998e-14	-0.420361	0.125	0.189	2.24916e-09	1.19703	0.905654
RPL12	8.40087e-14	-0.336132	0.163	0.236	2.3472e-09	1.37063	1.13764
MT-CYB	8.43537e-14	0.437449	0.89	0.906	2.35684e-09	4.06162	4.36484
ZNF706	8.87682e-14	-0.25201	0.068	0.119	2.48018e-09	0.671139	0.496459
NIN	1.09719e-13	-0.300937	0.146	0.217	3.06556e-09	1.21839	1.00979
FAM102A	1.1618e-13	-0.277964	0.112	0.174	3.24607e-09	1.01338	0.820707
SEL1L3	1.19551e-13	-0.268806	0.081	0.136	3.34026e-09	0.823208	0.636886
RPL23	1.51213e-13	-0.3012	0.111	0.172	4.22488e-09	1.00552	0.796748
PARP8	1.8031e-13	-0.281692	0.305	0.393	5.03786e-09	1.88977	1.69452
TNFAIP8	2.29737e-13	-0.227138	0.104	0.164	6.41886e-09	0.924392	0.766952
SKIL	2.42769e-13	-0.2077	0.167	0.241	6.78296e-09	1.26832	1.12436
OIP5-AS1	2.4467e-13	-0.240697	0.182	0.26	6.83608e-09	1.29591	1.12907
ATP8A1	2.78458e-13	-0.248817	0.151	0.222	7.78012e-09	1.20952	1.03706
RPL36A	2.92128e-13	-0.401287	0.13	0.192	8.16205e-09	1.17149	0.893344
EEF1G	2.93282e-13	-0.306698	0.092	0.149	8.1943e-09	0.903976	0.691389
GZMA	3.27938e-13	0.669537	0.145	0.092	9.16259e-09	0.685762	1.14985
APBA2	4.15729e-13	-0.319261	0.086	0.141	1.16155e-08	0.962888	0.741593
CCDC6	4.34565e-13	-0.27112	0.055	0.1	1.21417e-08	0.654428	0.466502
CYTH1	4.64233e-13	-0.223287	0.218	0.301	1.29707e-08	1.49764	1.34287
RACK1	5.08987e-13	-0.275259	0.144	0.212	1.42211e-08	1.15529	0.964497
H3F3A	5.72846e-13	-0.27413	0.167	0.239	1.60053e-08	1.21023	1.02022
DYNC1H1	5.87207e-13	-0.220428	0.306	0.399	1.64066e-08	1.84184	1.68905
NFKBIA	6.14653e-13	-0.282853	0.137	0.203	1.71734e-08	1.15938	0.963317
MOB1A	7.23929e-13	-0.305786	0.088	0.142	2.02266e-08	0.823618	0.611663
AC007384.1	7.86687e-13	-0.276208	0.061	0.108	2.198e-08	0.718056	0.526603
EDEM1	9.9392e-13	-0.279998	0.071	0.121	2.77701e-08	0.723045	0.528965
RPL10A	1.01268e-12	-0.255434	0.146	0.214	2.82942e-08	1.13924	0.962191
EVI2A	1.05156e-12	-0.302811	0.059	0.105	2.93806e-08	0.668953	0.459061
AL354733.3	1.08937e-12	0.536029	0.115	0.068	3.04369e-08	0.469292	0.840839
RBM12	1.10901e-12	-0.295341	0.078	0.129	3.09858e-08	0.784717	0.580002
ERN1	1.16609e-12	-0.363936	0.193	0.266	3.25805e-08	1.49833	1.24606
SDCBP	1.31887e-12	-0.231694	0.094	0.151	3.68492e-08	0.917268	0.75667
EIF1	1.41009e-12	-0.245113	0.237	0.317	3.93979e-08	1.50688	1.33698
ZBTB1	1.48078e-12	-0.274093	0.1	0.157	4.13731e-08	0.920481	0.730494
CHST12	1.64495e-12	0.649859	0.207	0.15	4.596e-08	1.02419	1.47464
ATP1B3	1.8825e-12	-0.316381	0.105	0.162	5.25969e-08	1.06485	0.845548
BBX	2.16175e-12	-0.260198	0.139	0.205	6.03992e-08	1.13774	0.957382
PTBP3	2.26852e-12	-0.241153	0.157	0.225	6.33823e-08	1.18454	1.01738
GPRIN3	2.38054e-12	-0.273507	0.236	0.312	6.65122e-08	1.6101	1.42052
SERINC1	2.39644e-12	-0.227587	0.092	0.147	6.69566e-08	0.835331	0.677579
ACTR2	2.86451e-12	-0.228715	0.19	0.264	8.00344e-08	1.30217	1.14363
NAP1L1	2.90678e-12	-0.287476	0.2	0.273	8.12153e-08	1.40672	1.20746
EPB41	2.95553e-12	-0.249589	0.234	0.314	8.25776e-08	1.55875	1.38575
CD247	3.55308e-12	0.551191	0.181	0.127	9.92731e-08	0.823604	1.20566
MSL2	3.60014e-12	-0.276441	0.082	0.133	1.00588e-07	0.80544	0.613825
JOSD1	3.89332e-12	-0.252736	0.134	0.198	1.08779e-07	1.0896	0.914419
RPS6KA3	4.02916e-12	-0.268923	0.178	0.247	1.12575e-07	1.29507	1.10866
TCF4	4.09683e-12	-0.288658	0.106	0.163	1.14466e-07	1.04398	0.843902
MTPN	4.78031e-12	-0.284835	0.065	0.111	1.33562e-07	0.664721	0.467289
ZBTB44	4.80592e-12	-0.244347	0.078	0.128	1.34277e-07	0.771382	0.602014
HMGB2	6.62656e-12	-0.295	0.067	0.113	1.85146e-07	0.755224	0.550746
PPM1K	7.05902e-12	-0.216442	0.139	0.203	1.97229e-07	1.09873	0.948704
TNFRSF1B	8.35858e-12	-0.287267	0.144	0.206	2.33539e-07	1.1883	0.989182
GCC2	9.17773e-12	-0.228923	0.413	0.504	2.56426e-07	2.19577	2.03709
RPS24	9.55455e-12	-0.26908	0.306	0.392	2.66954e-07	1.8848	1.69828
PPP1R15B	1.04095e-11	-0.245199	0.062	0.106	2.90842e-07	0.630245	0.460286
FOSB	1.1702e-11	-0.22791	0.201	0.276	3.26953e-07	1.60585	1.44787
PTPN1	1.2187e-11	-0.205995	0.127	0.189	3.40504e-07	1.06071	0.917927
MIR29B2CHG	1.24515e-11	-0.307622	0.117	0.174	3.47894e-07	1.13379	0.920559
RIPOR2	1.39258e-11	-0.344838	0.151	0.214	3.89087e-07	1.29203	1.053
TAF7	1.54305e-11	-0.194879	0.1	0.155	4.31129e-07	0.878869	0.743789
ZNF652	1.55595e-11	-0.206872	0.085	0.136	4.34731e-07	0.800989	0.657596
ASXL2	1.58744e-11	-0.269905	0.095	0.148	4.43531e-07	0.878505	0.691421
HIPK2	1.96511e-11	-0.220492	0.103	0.158	5.49053e-07	0.982327	0.829494
CD53	2.08073e-11	-0.239258	0.171	0.238	5.81356e-07	1.24757	1.08173
STX7	2.27971e-11	-0.26899	0.095	0.148	6.3695e-07	0.96985	0.7834
MAPK1IP1L	2.34619e-11	-0.211899	0.076	0.124	6.55526e-07	0.727644	0.580767
SNX9	2.36255e-11	-0.281481	0.073	0.12	6.60097e-07	0.83072	0.635612
ZFP36	2.37186e-11	-0.329956	0.195	0.264	6.62697e-07	1.47631	1.2476
RPL37A	2.47851e-11	-0.352141	0.183	0.25	6.92496e-07	1.4415	1.19742
FCHSD2	2.74616e-11	-0.191439	0.063	0.108	7.67276e-07	0.655426	0.52273
CCR6	2.81304e-11	-0.266997	0.062	0.106	7.85962e-07	0.773445	0.588377
TMEM123	2.93936e-11	-0.240727	0.078	0.125	8.21258e-07	0.728559	0.5617
PRDM2	2.96171e-11	-0.180287	0.212	0.29	8.27501e-07	1.42472	1.29975
MGAT4A	3.67208e-11	-0.30555	0.131	0.19	1.02598e-06	1.15363	0.941837
PIK3R1	3.72711e-11	-0.244627	0.403	0.48	1.04136e-06	2.21435	2.04479
SP140	3.72759e-11	-0.201774	0.096	0.15	1.04149e-06	0.913962	0.774103
SLA	4.41014e-11	-0.221565	0.259	0.335	1.23219e-06	1.75447	1.60089
UBB	5.55695e-11	-0.226012	0.063	0.106	1.55261e-06	0.669077	0.512417
ITGAL	5.62567e-11	0.484102	0.2	0.148	1.57181e-06	0.913243	1.2488
RPL35A	5.74202e-11	-0.261394	0.152	0.215	1.60432e-06	1.22211	1.04093
EIF4B	5.9241e-11	-0.232767	0.135	0.196	1.65519e-06	1.06772	0.90638
DUSP2	5.92518e-11	-0.230389	0.139	0.2	1.6555e-06	1.30896	1.14926
PVT1	6.03767e-11	-0.218486	0.074	0.121	1.68693e-06	0.768926	0.617483
SOD2	7.03258e-11	-0.224106	0.142	0.203	1.9649e-06	1.15145	0.996107
MDFIC	7.32254e-11	-0.18696	0.105	0.159	2.04592e-06	0.910435	0.780844
TIPARP	7.45196e-11	-0.206757	0.067	0.111	2.08208e-06	0.710921	0.567608
RESF1	7.51055e-11	-0.167988	0.475	0.57	2.09845e-06	2.39036	2.27392
TMSB4X	8.08775e-11	-0.146736	0.341	0.43	2.25972e-06	1.98786	1.88615
NORAD	9.49929e-11	-0.243772	0.114	0.168	2.6541e-06	0.911881	0.742912
UBXN7	9.76908e-11	-0.289331	0.076	0.121	2.72948e-06	0.768461	0.567913
KAT2B	1.10741e-10	-0.237112	0.104	0.157	3.09412e-06	0.930449	0.766095
TMSB10	1.29344e-10	-0.18623	0.202	0.273	3.61388e-06	1.44207	1.31299
LBH	1.42272e-10	-0.277003	0.07	0.113	3.97508e-06	0.689278	0.497274
TNPO1	1.49508e-10	-0.213574	0.1	0.152	4.17725e-06	0.870331	0.722293
UBE2D3	1.51331e-10	-0.207144	0.259	0.337	4.22819e-06	1.56345	1.41986
USF2	1.64444e-10	-0.194107	0.086	0.134	4.59457e-06	0.802621	0.668076
XIST	1.79646e-10	-0.121605	0.858	0.9	5.01932e-06	3.63064	3.54635
DEGS2	1.84145e-10	0.487855	0.115	0.073	5.14502e-06	0.513216	0.851371
AKIRIN1	2.0753e-10	-0.209942	0.07	0.114	5.79838e-06	0.681882	0.536361
MT2A	2.13576e-10	-0.256368	0.113	0.166	5.96732e-06	1.02388	0.846178
CCND3	2.4385e-10	-0.211418	0.097	0.148	6.81316e-06	0.840594	0.69405
KAT6A	2.44244e-10	-0.209168	0.226	0.3	6.82417e-06	1.47023	1.32525
ITPR1	2.5122e-10	-0.180344	0.133	0.192	7.0191e-06	1.11967	0.994662
RAP1A	2.52437e-10	-0.241564	0.062	0.103	7.0531e-06	0.624613	0.457174
RPL36AL	2.73656e-10	-0.252787	0.069	0.112	7.64594e-06	0.683942	0.508723
ARID1B	2.95863e-10	-0.208822	0.36	0.44	8.26642e-06	1.93896	1.79422
UQCRB	3.05085e-10	-0.258504	0.061	0.101	8.52406e-06	0.645633	0.466452
SATB1	3.16361e-10	-0.326363	0.137	0.191	8.83912e-06	1.19675	0.970532
GSPT1	3.57645e-10	-0.189409	0.107	0.159	9.9926e-06	0.918873	0.787585
TRA2B	3.65725e-10	-0.171053	0.298	0.382	1.02184e-05	1.7208	1.60223
ZBTB20	3.7247e-10	-0.216272	0.226	0.298	1.04068e-05	1.49748	1.34757
CHD7	3.87409e-10	-0.157469	0.097	0.148	1.08242e-05	0.904762	0.795613
TMBIM6	4.53977e-10	-0.189662	0.152	0.212	1.26841e-05	1.09253	0.961067
ZBTB37	4.82804e-10	-0.285261	0.093	0.14	1.34895e-05	0.890384	0.692657
TMEM154	5.40927e-10	-0.180643	0.061	0.102	1.51135e-05	0.632519	0.507307
USP48	5.86197e-10	-0.173091	0.165	0.227	1.63783e-05	1.20192	1.08194
JUN	6.54548e-10	-0.235971	0.171	0.231	1.82881e-05	1.48296	1.31939
ADAM10	6.99625e-10	-0.166432	0.166	0.23	1.95475e-05	1.17713	1.06176
CALM2	7.13694e-10	-0.213789	0.165	0.227	1.99406e-05	1.20977	1.06159
CREBRF	7.47662e-10	-0.115835	0.196	0.267	2.08897e-05	1.34628	1.26598
PAPOLA	8.08457e-10	-0.147145	0.216	0.288	2.25883e-05	1.37165	1.26966
EIF1AX	8.37672e-10	-0.202283	0.135	0.192	2.34046e-05	1.06097	0.920759
JUNB	8.76845e-10	-0.160326	0.173	0.238	2.44991e-05	1.29601	1.18488
CSDE1	1.04027e-09	-0.228214	0.126	0.179	2.9065e-05	0.998313	0.840128
ATXN7L3B	1.0547e-09	-0.194454	0.071	0.113	2.94683e-05	0.685883	0.551098
BRWD1	1.17473e-09	-0.172865	0.171	0.235	3.2822e-05	1.24958	1.12976
ZEB2	1.18319e-09	-0.262333	0.167	0.226	3.30583e-05	1.41662	1.23478
SLFN13	1.31407e-09	0.536577	0.166	0.121	3.67151e-05	0.932976	1.3049
NSD3	1.51611e-09	-0.166623	0.249	0.323	4.23601e-05	1.53511	1.41961
MT-ND5	1.80513e-09	0.37301	0.755	0.786	5.04353e-05	3.14023	3.39878
PDE4D	1.82454e-09	-0.245492	0.179	0.239	5.09776e-05	1.33643	1.16627
USP36	1.96148e-09	-0.241739	0.225	0.292	5.48036e-05	1.56301	1.39545
SFPQ	2.22769e-09	-0.15943	0.334	0.42	6.22416e-05	1.82007	1.70956
MAVS	2.30798e-09	-0.186103	0.127	0.182	6.4485e-05	1.07196	0.94296
GABPB1-IT1	2.53275e-09	-0.210359	0.12	0.172	7.0765e-05	1.02122	0.875406
MSN	2.55621e-09	-0.210537	0.114	0.165	7.14205e-05	0.940994	0.79506
IFI16	2.71425e-09	-0.175201	0.301	0.376	7.58361e-05	1.74137	1.61993
MRPL1	2.87776e-09	-0.206239	0.062	0.1	8.04047e-05	0.705064	0.562109
CREBBP	2.96626e-09	-0.191915	0.123	0.176	8.28772e-05	1.00866	0.87563
PABPC4	3.09969e-09	-0.163928	0.138	0.193	8.66052e-05	1.1027	0.989075
ARIH1	3.4828e-09	-0.186057	0.114	0.165	9.73095e-05	0.943851	0.814887
ABLIM1	3.87478e-09	-0.2958	0.11	0.157	0.000108261	1.0235	0.818463
HNRNPC	4.25395e-09	-0.133745	0.205	0.273	0.000118855	1.33039	1.23768
TGFBR2	4.42386e-09	-0.20866	0.144	0.199	0.000123603	1.12584	0.981208
LRP10	4.68003e-09	-0.184158	0.068	0.107	0.00013076	0.692191	0.564543
FTL	5.0177e-09	-0.203776	0.131	0.183	0.000140195	1.02905	0.887803
CDC14A	5.41697e-09	-0.282054	0.121	0.17	0.00015135	1.07128	0.875776
CHD3	5.5157e-09	0.332286	0.259	0.207	0.000154109	1.28482	1.51514
MT-ND2	6.22481e-09	0.320156	0.863	0.895	0.000173921	3.70942	3.93133
DUSP16	6.26204e-09	-0.225873	0.08	0.122	0.000174961	0.73984	0.583277
RPS9	6.56461e-09	-0.241004	0.122	0.173	0.000183415	0.997724	0.830673
ANAPC16	6.6968e-09	-0.170743	0.102	0.149	0.000187109	0.85345	0.7351
ITSN2	7.07738e-09	-0.137388	0.19	0.253	0.000197742	1.3221	1.22687
HSPA9	7.1216e-09	-0.138535	0.136	0.191	0.000198977	1.0388	0.942777
ELK3	7.15264e-09	-0.186962	0.102	0.15	0.000199845	0.911996	0.782403
CREB1	7.1647e-09	-0.140902	0.08	0.123	0.000200182	0.737007	0.639341
RPL31	7.2866e-09	-0.26977	0.092	0.135	0.000203588	0.862533	0.675543
PHF20	7.61412e-09	-0.189437	0.126	0.178	0.000212739	1.03358	0.902271
PCNX1	8.25557e-09	-0.134188	0.256	0.33	0.000230661	1.59729	1.50427
FGFR1OP2	8.5885e-09	-0.160725	0.142	0.197	0.000239963	1.05326	0.941859
CDC42SE2	8.66067e-09	-0.165435	0.25	0.321	0.000241979	1.51358	1.3989
CANX	9.44007e-09	-0.195589	0.104	0.15	0.000263756	0.859788	0.724216
NACA	1.25112e-08	-0.251591	0.14	0.191	0.000349562	1.11587	0.941481
GBP5	1.32428e-08	-0.192029	0.113	0.16	0.000370003	0.997264	0.86416
ELK4	1.37434e-08	-0.167365	0.125	0.175	0.00038399	0.981592	0.865583
NR2C2	1.41842e-08	-0.167886	0.067	0.105	0.000396307	0.650174	0.533804
INO80D	1.45652e-08	-0.164567	0.12	0.17	0.000406953	0.978833	0.864764
CCNI	1.49286e-08	-0.17765	0.162	0.218	0.000417104	1.14708	1.02395
CCDC144A	1.55715e-08	0.328291	0.19	0.144	0.000435069	1.00215	1.2297
DST	1.66827e-08	0.412716	0.226	0.179	0.000466116	1.14519	1.43127
TMED5	1.67356e-08	-0.220965	0.065	0.102	0.000467592	0.64798	0.494818
SERP1	1.76926e-08	-0.145554	0.087	0.13	0.000494331	0.731041	0.630151
MT-ATP8	1.84395e-08	0.47538	0.298	0.255	0.0005152	1.39761	1.72712
SYNE1	1.87787e-08	-0.158774	0.294	0.372	0.000524678	1.79284	1.68278
CAMK4	1.87923e-08	-0.208874	0.138	0.189	0.000525058	1.12705	0.982267
GOLGA8B	1.88957e-08	0.324679	0.451	0.417	0.000527946	1.89126	2.11631
C6orf62	2.04074e-08	-0.116563	0.157	0.214	0.000570184	1.13285	1.05206
MINDY2	2.04935e-08	-0.225646	0.097	0.141	0.000572589	0.875574	0.719168
ZMAT1	2.072e-08	-0.172761	0.085	0.126	0.000578916	0.86871	0.748962
CEBPB	2.08537e-08	-0.134155	0.088	0.131	0.000582653	0.781556	0.688567
CCL4	2.21969e-08	-0.163523	0.149	0.201	0.000620181	1.69985	1.5865
CLIP4	2.23778e-08	-0.233523	0.069	0.106	0.000625236	0.709828	0.547962
CNBP	2.37301e-08	-0.120635	0.084	0.126	0.000663018	0.730116	0.646498
PRRC2B	2.43069e-08	-0.147398	0.202	0.264	0.000679134	1.32405	1.22188
JADE1	2.43816e-08	-0.227134	0.08	0.121	0.000681223	0.777602	0.620165
TMF1	2.48833e-08	-0.152628	0.174	0.234	0.000695239	1.22455	1.11876
CD47	2.56875e-08	-0.149305	0.186	0.245	0.00071771	1.23695	1.13346
UBE2H	2.63685e-08	-0.192306	0.078	0.118	0.000736736	0.739401	0.606105
WAKMAR2	2.76012e-08	-0.253268	0.114	0.161	0.000771178	1.10395	0.928393
AGO2	2.8706e-08	-0.164398	0.19	0.25	0.000802045	1.34716	1.23321
UHRF2	3.17178e-08	-0.137403	0.15	0.205	0.000886195	1.12548	1.03024
HLA-A	3.5918e-08	-0.129778	0.386	0.468	0.00100355	2.01333	1.92338
JUND	3.64588e-08	-0.201233	0.371	0.448	0.00101866	2.05413	1.91465
ITGB1	3.66736e-08	-0.16982	0.217	0.278	0.00102466	1.42706	1.30935
CERT1	3.88397e-08	-0.158015	0.106	0.151	0.00108518	0.884006	0.774478
TLE5	3.9727e-08	-0.218981	0.111	0.156	0.00110997	0.902747	0.750961
ARMCX3	4.40676e-08	-0.210989	0.065	0.101	0.00123125	0.660349	0.514103
UGP2	4.41212e-08	-0.217119	0.159	0.211	0.00123275	1.25841	1.10791
Z83843.1	4.6394e-08	-0.162936	0.098	0.142	0.00129625	0.831135	0.718196
EPS15	4.98658e-08	-0.170279	0.154	0.207	0.00139325	1.11021	0.992179
THBS1	5.47755e-08	-0.146314	0.205	0.269	0.00153043	1.48143	1.38001
LINC00513	5.53262e-08	-0.0829411	0.082	0.122	0.00154581	0.758186	0.700695
ZNF331	5.8895e-08	-0.189884	0.117	0.163	0.00164553	1.08134	0.949718
YWHAZ	5.92814e-08	-0.171489	0.278	0.347	0.00165632	1.62337	1.5045
MORF4L1	6.18521e-08	-0.1258	0.125	0.175	0.00172815	0.958006	0.870808
B4GALT1	6.97856e-08	-0.192948	0.071	0.107	0.00194981	0.66779	0.534049
NR4A1	7.19613e-08	-0.0783534	0.21	0.275	0.0020106	1.53499	1.48068
CDC42	7.72044e-08	-0.136824	0.173	0.23	0.00215709	1.14885	1.05401
GGA2	8.32999e-08	-0.205629	0.101	0.142	0.0023274	0.886229	0.743697
FAM214A	8.45989e-08	-0.164572	0.175	0.23	0.00236369	1.23063	1.11656
PTAR1	9.4972e-08	-0.163036	0.127	0.175	0.00265352	0.977501	0.864493
CEP350	9.67084e-08	-0.165249	0.197	0.257	0.00270203	1.35955	1.24501
RABGAP1L	1.00085e-07	-0.140564	0.206	0.267	0.00279638	1.36288	1.26545
SMARCA2	1.00616e-07	-0.132322	0.223	0.285	0.00281121	1.45028	1.35856
PTGER4	1.088e-07	-0.256185	0.124	0.168	0.00303988	1.08636	0.908781
RAB21	1.11176e-07	-0.133217	0.085	0.124	0.00310626	0.723428	0.63109
POU2F1	1.11286e-07	-0.146527	0.067	0.102	0.00310933	0.6679	0.566335
YPEL1	1.11312e-07	-0.285938	0.066	0.1	0.00311006	0.740483	0.542285
SNHG5	1.22399e-07	-0.152043	0.112	0.156	0.00341982	0.929258	0.823869
SNTB2	1.32056e-07	-0.171764	0.098	0.14	0.00368966	0.8566	0.737542
INTS6	1.39988e-07	-0.157129	0.164	0.217	0.00391126	1.18876	1.07984
PCGF5	1.45308e-07	-0.163477	0.066	0.101	0.00405991	0.610974	0.497661
SUB1	1.47314e-07	-0.136547	0.113	0.157	0.00411595	0.855588	0.760941
MT-ND6	1.49028e-07	0.55012	0.237	0.198	0.00416383	1.16796	1.54927
TGOLN2	1.55145e-07	-0.11464	0.271	0.339	0.00433474	1.59415	1.51469
CALM1	1.58239e-07	-0.127197	0.274	0.342	0.0044212	1.62301	1.53484
ACSF3	1.70947e-07	-0.150594	0.07	0.105	0.00477626	0.680618	0.576234
ZBTB25	1.7508e-07	-0.187176	0.109	0.152	0.00489173	0.894458	0.764717
SESN1	1.75214e-07	-0.207538	0.067	0.102	0.00489549	0.702273	0.558418
CMTM6	1.78639e-07	-0.199168	0.076	0.112	0.00499118	0.673359	0.535307
HBP1	1.84721e-07	-0.15669	0.07	0.106	0.00516112	0.665361	0.556752
PUM2	1.85064e-07	-0.140851	0.123	0.17	0.00517068	0.95333	0.8557
PHLDA1	1.93799e-07	-0.204862	0.07	0.105	0.00541475	0.70766	0.56566
BAZ1A	1.94788e-07	-0.228636	0.217	0.274	0.00544237	1.49949	1.34102
XPO1	1.97139e-07	-0.121733	0.191	0.248	0.00550805	1.27299	1.18861
BRD4	2.00086e-07	-0.148232	0.148	0.199	0.0055904	1.11843	1.01568
YME1L1	2.13065e-07	-0.164761	0.115	0.159	0.00595302	0.919458	0.805254
CDV3	2.25552e-07	-0.114697	0.11	0.154	0.00630191	0.877792	0.79829
CCDC18-AS1	2.36253e-07	-0.166444	0.133	0.181	0.00660091	1.03656	0.921189
RNF125	2.39847e-07	-0.198921	0.144	0.192	0.00670132	1.14267	1.00479
BRD1	2.46512e-07	-0.162089	0.176	0.228	0.00688755	1.25196	1.13961
ZBTB16	2.50434e-07	-0.184215	0.152	0.201	0.00699714	1.29988	1.17219
MPHOSPH8	2.60216e-07	-0.154283	0.419	0.497	0.00727044	2.15825	2.05131
FAM160B1	2.68342e-07	-0.177707	0.076	0.111	0.00749748	0.742156	0.618979
GRB2	2.82318e-07	-0.159685	0.093	0.132	0.00788796	0.76542	0.654735
AC245297.3	3.11662e-07	-0.173383	0.309	0.373	0.00870784	1.75111	1.63093
EFCAB14	3.12191e-07	-0.168255	0.072	0.108	0.00872262	0.653459	0.536833
AC020916.1	3.56743e-07	-0.221228	0.271	0.331	0.00996741	1.93807	1.78473
TRAM1	3.67874e-07	-0.224751	0.076	0.111	0.0102784	0.707769	0.551984
IL18R1	3.69046e-07	-0.200077	0.106	0.146	0.0103111	0.979024	0.840341
MTDH	3.85093e-07	-0.108738	0.173	0.226	0.0107595	1.17164	1.09626
APOL6	3.95983e-07	-0.137966	0.133	0.179	0.0110638	1.009	0.913372
MED17	3.99388e-07	-0.139948	0.083	0.12	0.0111589	0.757448	0.660443
H2AFV	4.08932e-07	-0.182945	0.079	0.114	0.0114256	0.677802	0.550994
PRKACB	4.62192e-07	-0.126175	0.093	0.133	0.0129137	0.772965	0.685507
SEL1L	4.69525e-07	-0.152277	0.079	0.115	0.0131185	0.716169	0.610618
MPRIP	4.89767e-07	-0.122748	0.124	0.169	0.0136841	0.953411	0.868329
NOP58	5.03815e-07	-0.0706999	0.147	0.198	0.0140766	1.07979	1.03078
XPO6	5.28355e-07	-0.17348	0.066	0.1	0.0147622	0.682649	0.562402
CNST	5.30728e-07	-0.157315	0.069	0.103	0.0148285	0.661156	0.552113
CREB3L2	5.36201e-07	-0.238129	0.084	0.119	0.0149815	0.859268	0.694209
EBLN3P	6.07145e-07	-0.13455	0.102	0.143	0.0169636	0.838262	0.745
SAMSN1	6.10347e-07	-0.117817	0.181	0.234	0.0170531	1.251	1.16934
IL2RB	6.21449e-07	0.477805	0.159	0.122	0.0173633	0.896022	1.22721
LCP2	6.95755e-07	0.339958	0.15	0.113	0.0194394	0.768603	1.00424
ARHGAP5	6.9947e-07	-0.153068	0.133	0.178	0.0195432	1.05005	0.943951
SUSD6	7.13054e-07	-0.142961	0.07	0.104	0.0199227	0.638361	0.539268
BCL2	7.50555e-07	-0.105083	0.208	0.266	0.0209705	1.43406	1.36122
RERE	7.66099e-07	-0.150077	0.166	0.216	0.0214048	1.20666	1.10264
STIM2	7.66431e-07	-0.113372	0.14	0.188	0.0214141	1.05369	0.975102
MYBL1	7.67219e-07	0.330355	0.227	0.183	0.0214361	1.29939	1.52837
WIPF1	8.13427e-07	-0.116301	0.348	0.418	0.0227271	1.86473	1.78411
ZFP36L1	8.60677e-07	-0.106429	0.255	0.317	0.0240473	1.58771	1.51394
NPM1	8.62849e-07	-0.151716	0.097	0.135	0.024108	0.823716	0.718555
TERF1	8.68332e-07	-0.17635	0.087	0.124	0.0242612	0.829661	0.707425
SP100	8.79209e-07	-0.169414	0.318	0.382	0.0245651	1.81903	1.7016
TBL1XR1	9.0687e-07	-0.149565	0.136	0.182	0.025338	0.979341	0.87567
XRN1	9.0886e-07	-0.0964836	0.189	0.244	0.0253935	1.23541	1.16853
PURA	9.47113e-07	-0.112494	0.13	0.175	0.0264623	1.00524	0.927264
MAP4K4	9.86665e-07	-0.134131	0.145	0.192	0.0275674	1.08276	0.989784
NDFIP1	9.92022e-07	-0.198797	0.094	0.131	0.0277171	0.827952	0.690156
ANKRD44	1.01583e-06	-0.109721	0.352	0.424	0.0283822	1.85024	1.77419
SNRNP70	1.03844e-06	-0.124668	0.323	0.393	0.0290141	1.78911	1.70269
ITGA1	1.0482e-06	0.293777	0.241	0.196	0.0292867	1.32844	1.53207
MAN2A1	1.05816e-06	-0.133637	0.112	0.153	0.0295651	0.908578	0.815948
MARF1	1.08552e-06	-0.145676	0.118	0.159	0.0303294	0.956464	0.855489
GNA13	1.13283e-06	-0.1206	0.083	0.119	0.0316513	0.707016	0.623423
PYHIN1	1.17011e-06	-0.202461	0.165	0.213	0.0326929	1.2441	1.10376
SEPTIN7	1.18638e-06	-0.145024	0.284	0.348	0.0331475	1.6264	1.52588
ARHGEF1	1.21767e-06	0.415727	0.344	0.317	0.0340217	1.59324	1.8814
RHOH	1.25643e-06	-0.164281	0.108	0.147	0.0351047	0.873165	0.759294
USP9X	1.27244e-06	-0.12249	0.133	0.178	0.0355519	1.00285	0.917945
C11orf58	1.29807e-06	-0.0712794	0.19	0.245	0.036268	1.25706	1.20765
RHOA	1.39784e-06	-0.184961	0.073	0.106	0.0390556	0.666566	0.538361
FOSL2	1.43573e-06	-0.156077	0.197	0.25	0.0401142	1.47421	1.36603
HNRNPUL1	1.46708e-06	-0.105598	0.112	0.153	0.0409903	0.917495	0.8443
MAF	1.48316e-06	-0.4217	0.203	0.247	0.0414394	1.78008	1.48778
RBM8A	1.50377e-06	-0.186865	0.075	0.108	0.0420152	0.715234	0.585709
ELP2	1.53315e-06	-0.13658	0.105	0.144	0.0428361	0.847309	0.752639
AFF1	1.57463e-06	-0.063125	0.112	0.154	0.0439952	0.88285	0.839095
GABPB2	1.5791e-06	-0.155311	0.069	0.101	0.0441202	0.693101	0.585447
MKLN1	1.6069e-06	-0.156736	0.14	0.185	0.0448969	1.05077	0.942132
GPCPD1	1.68556e-06	-0.141381	0.18	0.23	0.0470945	1.24721	1.14921
WNK1	1.7419e-06	-0.109851	0.219	0.276	0.0486688	1.42227	1.34613
