# Supplementary material for: Dienogest interrupts the chemokine signalling axis in endometriotic lesions with resistant signatures providing novel opportunities for personalised treatment.
Source: Research Square preprint supplement (doi:10.21203/rs.3.rs-8096027/v1), 2026-01-13
Supplement: Supplementary file 3 [file 4398ae587ed2906fcbe1de8f.xlsx]

## Sheet: Sheet1
Supplementary Table 7: DEG between responders and non-responders in stromal cells
gene_ID	p_val	avg_log2FC	pct.1	pct.2	p_val_adj	mean_treated	mean_untreaded
EGR1	5.1e-182	-0.67612	0.39	0.596	1.4e-177	2.59508	2.12643
MT2A	5.4e-179	-1.10775	0.223	0.403	1.5e-174	2.3949	1.62706
NR4A2	6.1e-172	-0.94378	0.164	0.33	1.7e-167	1.86636	1.21218
ADAM12	1.4e-170	-0.7853	0.043	0.152	3.8e-166	0.900048	0.355721
PLCG2	5.4e-164	-0.7514	0.708	0.817	1.5e-159	4.70806	4.18723
EGR3	4.5e-162	-0.68126	0.088	0.224	1.3e-157	1.16436	0.692149
KCNE4	4.9e-159	-0.68681	0.038	0.138	1.4e-154	0.79509	0.319027
FOSL2	5.4e-156	-0.61259	0.22	0.402	1.5e-151	1.62716	1.20255
NR4A3	1.2e-154	-0.63913	0.097	0.235	3.4e-150	1.17827	0.735261
NR4A1	2.1e-147	-0.53613	0.509	0.69	5.8e-143	3.23272	2.8611
SFRP4	1.8e-141	-0.8258	0.265	0.433	5e-137	2.24545	1.67305
ZFAND5	2.5e-140	-0.61963	0.316	0.503	7e-136	2.1547	1.72521
CHMP1B	6.2e-140	-0.7406	0.053	0.156	1.7e-135	0.903667	0.390321
COL4A1	1.2e-132	-0.62639	0.312	0.491	3.3e-128	2.19385	1.75967
CYTOR	7.5e-132	-0.60567	0.125	0.263	2.1e-127	1.44055	1.02073
SLC2A3	9.5e-131	-0.55755	0.228	0.397	2.7e-126	1.86576	1.47929
CHSY1	2.1e-130	-0.50343	0.122	0.261	5.9e-126	1.15354	0.804593
HSPE1	1.1e-126	-0.777	0.098	0.219	3e-122	1.23881	0.700235
SFRP1	3.7e-125	-0.68622	0.167	0.312	1e-120	1.68519	1.20954
PHLDA1	2e-122	-0.58454	0.096	0.216	5.6e-118	1.11996	0.714785
SFRP2	4.2e-122	-1.10627	0.209	0.347	1.2e-117	2.19512	1.42831
BTG2	1.4e-120	-0.6783	0.195	0.343	3.9e-116	1.71391	1.24375
MCL1	2.4e-119	-0.50112	0.337	0.515	6.8e-115	2.07197	1.72462
RASD1	1.7e-117	-0.72559	0.041	0.126	4.8e-113	0.861737	0.358795
THY1	3.5e-117	-0.42191	0.062	0.162	9.8e-113	0.748308	0.455862
PRRX1	9.8e-117	-0.5065	0.214	0.371	2.7e-112	1.53994	1.18886
GEM	2.9e-116	-0.60173	0.141	0.275	8e-112	1.37283	0.955746
MIR4435-2HG	7.2e-115	-0.5521	0.063	0.163	2e-110	0.893592	0.510903
JUND	2.1e-110	-0.3876	0.445	0.622	5.8e-106	2.43967	2.171
KLF9	8e-110	-0.51316	0.197	0.345	2.2e-105	1.50661	1.15091
CYP1B1	1.1e-109	-0.76879	0.049	0.134	3.1e-105	0.947318	0.414436
TSC22D1	2.8e-108	-0.64378	0.144	0.271	7.9e-104	1.33645	0.890216
DNAJB1	1.6e-107	-0.50624	0.186	0.321	4.4e-103	1.9221	1.5712
SERPINH1	2.4e-102	-0.51509	0.116	0.232	6.59e-98	1.14871	0.791682
TPM4	6.6e-102	-0.47599	0.41	0.576	1.84e-97	2.28572	1.95579
ANKH	2.9e-99	-0.53872	0.098	0.205	7.98e-95	1.0206	0.647191
ADAMTS4	6.2e-99	-0.49128	0.087	0.19	1.73e-94	1.14503	0.804505
SRPX2	9.7e-99	-0.39584	0.119	0.238	2.71e-94	1.08145	0.807078
HSPH1	2.46e-97	-0.64886	0.248	0.383	6.88e-93	2.22392	1.77417
ELL2	3.51e-97	-0.61905	0.244	0.384	9.82e-93	1.97976	1.55067
CPE	9.01e-97	-0.394	0.065	0.155	2.52e-92	0.724632	0.451534
VCAN	2.79e-96	-0.3712	0.443	0.604	7.8e-92	2.56424	2.30695
JAG1	3.64e-96	-0.45449	0.069	0.161	1.02e-91	0.841634	0.526605
CREM	6.82e-96	-0.43326	0.108	0.22	1.9e-91	1.0225	0.722189
THBS2	8.78e-96	-0.63908	0.288	0.431	2.45e-91	2.20053	1.75755
CCN2	2.66e-93	-0.71639	0.264	0.403	7.44e-89	2.16528	1.66871
C11orf96	4.14e-93	-0.60698	0.158	0.28	1.16e-88	1.49094	1.07021
JOSD1	1.37e-92	-0.33113	0.097	0.203	3.83e-88	0.860974	0.631453
BGN	7.15e-92	-0.46428	0.069	0.158	2e-87	0.798577	0.476759
DIO2	7.64e-92	-0.64414	0.075	0.167	2.13e-87	1.11976	0.673282
ELMSAN1	2.34e-91	-0.40962	0.128	0.245	6.53e-87	1.10382	0.81989
FSTL1	4.53e-91	-0.39563	0.293	0.452	1.27e-86	1.75375	1.47951
SESN3	4.2e-90	-0.436	0.07	0.159	1.17e-85	0.756153	0.453944
RNF144A	8.56e-90	-0.37288	0.1	0.205	2.39e-85	0.881441	0.622981
ITPRIP	3.77e-89	-0.34723	0.062	0.148	1.05e-84	0.725542	0.484857
NREP	5.71e-89	-0.33322	0.057	0.14	1.59e-84	0.629694	0.398725
TENT5A	8.37e-88	-0.49314	0.096	0.195	2.34e-83	1.02098	0.67916
ZNF331	2.95e-87	-0.519	0.121	0.231	8.23e-83	1.27889	0.919145
SEPTIN11	3.31e-87	-0.40643	0.189	0.321	9.24e-83	1.3908	1.10908
B4GALT1	3.73e-86	-0.32507	0.096	0.196	1.04e-81	0.866559	0.641235
HSPA1A	1.06e-85	-0.55566	0.222	0.349	2.96e-81	2.323	1.93784
JUNB	5.8e-84	-0.47014	0.294	0.436	1.62e-79	1.99536	1.66949
COL4A2	6.9e-84	-0.38968	0.346	0.503	1.93e-79	2.04	1.7699
EDNRA	7.42e-83	-0.39885	0.07	0.155	2.07e-78	0.732001	0.455541
TLNRD1	1.8e-82	-0.34814	0.053	0.13	5.03e-78	0.631211	0.389899
PRICKLE2	1.82e-82	-0.4099	0.158	0.277	5.09e-78	1.23215	0.94803
AXL	3.14e-82	-0.36999	0.13	0.24	8.78e-78	1.0599	0.803444
IGF1	4.75e-82	-0.4661	0.233	0.364	1.33e-77	1.8629	1.53982
OAF	5.79e-82	-0.39196	0.081	0.171	1.62e-77	0.85266	0.580976
AKAP12	2.44e-81	-0.58819	0.204	0.331	6.81e-77	1.76598	1.35828
VPS37B	7.42e-81	-0.3765	0.06	0.14	2.07e-76	0.715505	0.454536
CEBPB	1.21e-80	-0.33792	0.209	0.343	3.37e-76	1.51172	1.2775
MAFF	2.35e-80	-0.28257	0.101	0.201	6.57e-76	0.940696	0.744831
FOSB	3.42e-80	-0.31429	0.44	0.6	9.56e-76	2.89576	2.67792
ATP1B3	5.06e-80	-0.8183	0.18	0.292	1.41e-75	1.92132	1.35411
NFIL3	1.06e-79	-0.32878	0.098	0.196	2.95e-75	0.903128	0.675234
PTEN	1.69e-79	-0.3955	0.182	0.306	4.72e-75	1.27027	0.996133
GABARAPL1	2.19e-79	-0.37999	0.142	0.255	6.11e-75	1.1444	0.881012
TIMP1	2.98e-79	-0.50443	0.12	0.222	8.34e-75	1.14287	0.793222
USP36	1.14e-78	-0.40858	0.159	0.278	3.18e-74	1.28525	1.00205
ZBTB21	2.47e-78	-0.31779	0.108	0.209	6.91e-74	0.931989	0.711717
ID3	3.87e-78	-0.52569	0.077	0.162	1.08e-73	0.916417	0.552037
PAG1	9.23e-78	-0.39385	0.044	0.113	2.58e-73	0.629974	0.35698
ATF3	2.77e-77	-0.31359	0.144	0.257	7.74e-73	1.33463	1.11727
TCEAL9	3.52e-77	-0.28577	0.07	0.154	9.84e-73	0.665295	0.467213
DUSP1	5.04e-77	-0.44573	0.331	0.469	1.41e-72	2.04675	1.73779
ENC1	5.2e-77	-0.38628	0.046	0.115	1.45e-72	0.626409	0.358663
PMEPA1	8.69e-77	-0.32772	0.1	0.196	2.43e-72	0.899587	0.67243
TCIM	1.55e-76	-0.44243	0.08	0.166	4.33e-72	0.921453	0.614782
WBP1L	2.03e-76	-0.29576	0.054	0.128	5.66e-72	0.583692	0.378687
HSPD1	2.18e-76	-0.45676	0.236	0.361	6.1e-72	1.84592	1.52932
CXCL14	2.78e-76	-0.6027	0.049	0.118	7.75e-72	0.882125	0.464363
COL7A1	1.24e-75	-0.57068	0.111	0.206	3.47e-71	1.25811	0.862546
SERPINE1	3.01e-74	-0.32051	0.199	0.323	8.4e-70	1.96075	1.73859
RNF24	4.23e-73	-0.26842	0.078	0.163	1.18e-68	0.711856	0.5258
HSPA8	1.09e-72	-0.30435	0.111	0.208	3.04e-68	0.975033	0.764071
STAT3	1.19e-72	-0.34136	0.43	0.577	3.34e-68	2.13493	1.89832
EGFR	1.41e-72	-0.32672	0.169	0.286	3.93e-68	1.22434	0.997875
IL1R1	1.52e-72	-0.32682	0.258	0.393	4.25e-68	1.6834	1.45687
HSPA1B	3.11e-72	-0.21569	0.182	0.3	8.7e-68	1.61246	1.46295
NDRG1	3.97e-72	-0.4502	0.126	0.226	1.11e-67	1.13794	0.825888
MALAT1	4.72e-72	0.178308	1	1	1.32e-67	7.39692	7.52051
RHOQ	6.09e-72	-0.35365	0.209	0.334	1.7e-67	1.48945	1.24432
NORAD	8.82e-72	-0.31519	0.156	0.267	2.46e-67	1.07407	0.8556
SLC19A2	7.94e-71	-0.3707	0.13	0.233	2.22e-66	1.18034	0.923386
PER1	9.61e-71	-0.252	0.165	0.284	2.68e-66	1.21951	1.04484
MNT	7.61e-70	-0.32744	0.091	0.177	2.13e-65	0.831228	0.604267
PRKAR1A	1.08e-69	-0.2732	0.141	0.248	3.02e-65	1.00263	0.813255
AGO2	1.14e-69	-0.28247	0.221	0.352	3.19e-65	1.40153	1.20574
LHFPL2	1.3e-69	-0.27228	0.142	0.249	3.63e-65	1.09332	0.904587
IRS1	1.34e-69	-0.28807	0.103	0.196	3.74e-65	0.830213	0.630537
TIMP2	1.56e-69	-0.34548	0.257	0.388	4.37e-65	1.57274	1.33327
MGP	5.72e-69	-0.68513	0.438	0.55	1.6e-64	2.84827	2.37337
VEGFA	1.09e-68	-0.30782	0.24	0.37	3.05e-64	1.63245	1.41909
HSP90AA1	1.24e-68	-0.46054	0.469	0.591	3.46e-64	2.88918	2.56996
PGAP1	5.92e-68	-0.58212	0.114	0.205	1.65e-63	1.28008	0.876583
LUM	1e-67	-0.3312	0.301	0.437	2.81e-63	1.98507	1.7555
F2R	1.86e-67	-0.30247	0.044	0.106	5.19e-63	0.522403	0.312745
PPP1R10	4.13e-67	-0.25737	0.156	0.267	1.15e-62	1.07353	0.89514
PPP1CB	2e-64	-0.36247	0.147	0.248	5.59e-60	1.10022	0.848975
ADAMTS1	5.79e-64	-0.45346	0.291	0.414	1.62e-59	2.11568	1.80137
VMP1	1.46e-63	-0.32397	0.641	0.76	4.09e-59	3.02885	2.8043
ARMCX3	1.51e-63	-0.27074	0.097	0.183	4.21e-59	0.797104	0.60944
CD55	2.21e-63	-0.30754	0.134	0.233	6.18e-59	1.08963	0.876467
EPAS1	7.01e-63	-0.37926	0.071	0.145	1.96e-58	0.773169	0.510284
MEDAG	7.21e-63	-0.43431	0.084	0.162	2.01e-58	0.990428	0.689385
SGIP1	1.89e-62	-0.36017	0.233	0.353	5.29e-58	1.61612	1.36647
TRIB1	2.12e-62	-0.31704	0.076	0.152	5.92e-58	0.836575	0.616818
SPARC	2.98e-62	-0.39156	0.258	0.38	8.34e-58	1.64683	1.37543
ITGAV	6.94e-62	-0.29009	0.195	0.31	1.94e-57	1.31408	1.11301
RND3	2.13e-61	-0.28602	0.218	0.334	5.95e-57	1.64341	1.44515
SAMD4A	3.61e-61	-0.28292	0.237	0.358	1.01e-56	1.6257	1.4296
INHBA	1.16e-60	-0.43767	0.11	0.195	3.23e-56	1.37154	1.06817
MMP11	1.38e-60	-0.52146	0.053	0.116	3.85e-56	0.834469	0.473018
ATP2A2	1.98e-60	-0.32942	0.215	0.331	5.53e-56	1.41525	1.18691
MYH11	2.59e-60	1.42129	0.192	0.111	7.23e-56	1.13803	2.1232
NEAT1	2.8e-60	-0.1685	0.992	0.995	7.82e-56	5.15858	5.04178
MX2	3.59e-60	-0.32677	0.081	0.157	1e-55	0.81701	0.59051
CDH11	4.71e-60	-0.29945	0.177	0.284	1.32e-55	1.21129	1.00373
DYRK3	5.28e-60	-0.24709	0.103	0.189	1.48e-55	0.906709	0.735438
UGCG	6.12e-60	-0.24897	0.14	0.239	1.71e-55	1.04397	0.871395
TGFBI	7.81e-60	-0.40477	0.069	0.139	2.18e-55	0.861407	0.580841
RYBP	7.95e-60	-0.23347	0.074	0.147	2.22e-55	0.638706	0.476876
ZNF281	1.13e-59	-0.20136	0.048	0.109	3.16e-55	0.483662	0.34409
PTPRG	1.21e-59	-0.3011	0.154	0.255	3.39e-55	1.14764	0.938928
RBMS3	2.73e-59	-0.26894	0.134	0.23	7.63e-55	1.05466	0.868243
FGF7	6.44e-59	-0.4609	0.147	0.241	1.8e-54	1.39414	1.07467
TWIST1	1.85e-58	-0.29321	0.059	0.125	5.18e-54	0.604604	0.401363
COL18A1	2.8e-58	-0.30361	0.18	0.287	7.81e-54	1.31671	1.10626
SH3PXD2B	3.11e-58	-0.19835	0.085	0.163	8.68e-54	0.727102	0.58962
ZEB2	4.67e-58	-0.27094	0.261	0.387	1.3e-53	1.59651	1.40871
ITM2B	6.87e-58	-0.32348	0.279	0.402	1.92e-53	1.63516	1.41095
PIM1	7.47e-58	-0.33127	0.12	0.208	2.09e-53	1.07208	0.84246
MAP1B	8.84e-58	-0.42328	0.13	0.22	2.47e-53	1.24149	0.948093
FOS	1.34e-57	-0.25136	0.54	0.667	3.75e-53	2.98707	2.81284
CEBPD	1.54e-57	-0.35589	0.259	0.376	4.31e-53	1.7105	1.46382
ITPRIPL2	1.57e-57	-0.23499	0.115	0.203	4.38e-53	0.878362	0.715477
MPRIP	4.39e-57	-0.28253	0.149	0.246	1.23e-52	1.08666	0.890831
JARID2	5.09e-57	-0.23071	0.062	0.129	1.42e-52	0.614827	0.454912
ID4	1.14e-56	-0.41085	0.169	0.267	3.17e-52	1.32031	1.03553
TBX3	1.31e-56	-0.38118	0.131	0.22	3.67e-52	1.13966	0.875449
DLC1	5.98e-56	-0.23937	0.175	0.28	1.67e-51	1.20764	1.04173
HOMER1	1.21e-55	-0.38328	0.086	0.159	3.37e-51	0.837638	0.571966
LONRF1	1.48e-55	-0.25451	0.112	0.197	4.12e-51	0.914904	0.73849
COPA	1.64e-55	-0.22186	0.223	0.341	4.59e-51	1.33134	1.17756
NRP1	2.03e-55	-0.27163	0.136	0.229	5.67e-51	1.05997	0.871693
RNF217	2.18e-55	-0.26725	0.108	0.191	6.1e-51	0.879313	0.694067
TOB2	5.56e-55	-0.22735	0.089	0.166	1.55e-50	0.78447	0.626883
TSC22D3	7.24e-55	-0.29596	0.196	0.302	2.02e-50	1.52247	1.31733
PEAK1	8.48e-55	-0.25339	0.168	0.27	2.37e-50	1.20522	1.02959
FAM131A	8.5e-55	-0.21825	0.082	0.156	2.38e-50	0.746944	0.595665
MIDN	1.07e-54	-0.28295	0.2	0.31	2.99e-50	1.39305	1.19692
ARL5A	1.17e-54	-0.21465	0.084	0.158	3.28e-50	0.67712	0.528337
CTSK	1.56e-54	-0.23754	0.063	0.129	4.37e-50	0.590782	0.426131
CSRNP1	2.34e-54	-0.23737	0.07	0.138	6.54e-50	0.646879	0.482349
KCTD20	4.48e-54	-0.20614	0.089	0.165	1.25e-49	0.733241	0.590354
PITPNC1	8.03e-54	-0.20549	0.054	0.115	2.24e-49	0.558404	0.415967
LONRF2	8.68e-54	-0.30356	0.239	0.351	2.43e-49	1.62989	1.41948
KLF2	9.85e-54	-0.30706	0.122	0.207	2.75e-49	1.07841	0.865571
SEMA6A	1.19e-53	-0.32541	0.053	0.113	3.31e-49	0.681743	0.456186
COL5A2	2.29e-53	-0.2333	0.259	0.381	6.4e-49	1.54371	1.382
LIMS1	3.08e-53	-0.2189	0.123	0.21	8.62e-49	0.894775	0.743045
EPS8	3.36e-53	-0.28011	0.199	0.306	9.38e-49	1.32779	1.13363
STK24	3.66e-53	-0.2054	0.111	0.195	1.02e-48	0.87959	0.737217
HSPA9	5.42e-53	-0.21498	0.178	0.283	1.51e-48	1.17127	1.02226
FAM118A	6.28e-53	-0.20651	0.198	0.306	1.75e-48	1.31845	1.17531
FTL	6.36e-53	-0.22088	0.174	0.276	1.78e-48	1.17072	1.01761
SPRED1	8.49e-53	-0.22561	0.08	0.151	2.37e-48	0.673964	0.517585
UBC	1.01e-52	-0.28088	0.225	0.335	2.83e-48	1.55953	1.36484
TMEM263	1.3e-52	-0.22419	0.099	0.178	3.64e-48	0.78106	0.625661
DNAJB4	1.45e-52	-0.16566	0.068	0.134	4.04e-48	0.613051	0.498221
RRBP1	1.62e-52	-0.21486	0.35	0.491	4.54e-48	1.8554	1.70647
TSPYL2	2.06e-52	-0.29314	0.231	0.344	5.77e-48	1.51122	1.30803
ZDBF2	2.33e-52	-0.20601	0.135	0.226	6.5e-48	1.05489	0.912095
MMP2	2.45e-52	-0.28266	0.157	0.251	6.84e-48	1.11548	0.919556
MINDY2	3.73e-52	-0.24091	0.101	0.179	1.04e-47	0.836351	0.669368
COL1A2	4.61e-52	-0.37699	0.592	0.699	1.29e-47	2.89528	2.63398
NFIB	4.8e-52	-0.22479	0.192	0.298	1.34e-47	1.27171	1.1159
RHOB	1.05e-51	-0.25407	0.117	0.2	2.94e-47	0.893435	0.71733
CACNA1D	1.66e-51	-0.23948	0.161	0.256	4.65e-47	1.29799	1.132
VGLL4	6.2e-51	-0.23243	0.108	0.188	1.73e-46	0.83962	0.678511
LDLRAD4	7.57e-51	-0.21526	0.083	0.155	2.12e-46	0.704924	0.555718
FHL2	9.82e-51	-0.19493	0.058	0.119	2.75e-46	0.571852	0.436738
COL3A1	1.06e-50	-0.38342	0.596	0.694	2.97e-46	2.91499	2.64922
CDC42SE1	1.1e-50	-0.19526	0.102	0.18	3.08e-46	0.789271	0.653927
SLC3A2	1.52e-50	-0.22545	0.049	0.104	4.24e-46	0.495798	0.339526
IGFBP7	2e-50	-0.30995	0.277	0.393	5.58e-46	1.6584	1.44356
PPP1R15A	2.05e-50	-0.25741	0.161	0.256	5.74e-46	1.21335	1.03492
HNRNPUL1	2.11e-50	-0.21634	0.091	0.165	5.89e-46	0.756996	0.607041
DNAJA1	2.73e-50	-0.21101	0.163	0.26	7.64e-46	1.15973	1.01347
ERRFI1	3.02e-50	-0.31683	0.163	0.254	8.44e-46	1.37588	1.15627
TEAD1	6.6e-50	-0.25263	0.232	0.342	1.84e-45	1.41168	1.23657
SPON1	6.92e-50	-0.26584	0.146	0.236	1.93e-45	1.02357	0.839303
FARP1	7.01e-50	-0.20716	0.166	0.263	1.96e-45	1.14656	1.00297
RDH10	8.17e-50	-0.38691	0.062	0.121	2.28e-45	0.751992	0.483806
SKIL	9.48e-50	-0.23727	0.272	0.391	2.65e-45	1.65337	1.4889
GBP1	1.22e-49	-0.43822	0.101	0.173	3.41e-45	1.05886	0.755111
WWTR1	1.42e-49	-0.22412	0.132	0.219	3.97e-45	0.957631	0.802282
HNRNPU	1.89e-49	-0.29723	0.68	0.777	5.28e-45	2.96483	2.75881
SELENOS	2.03e-49	-0.24299	0.161	0.256	5.68e-45	1.13708	0.968647
CD276	2.88e-49	-0.21356	0.055	0.113	8.04e-45	0.552246	0.404221
PHLDB1	3.75e-49	-0.24759	0.369	0.5	1.05e-44	1.96614	1.79452
TWIST2	5e-49	-0.26374	0.062	0.122	1.4e-44	0.604523	0.421709
IGFBP4	7.34e-49	-0.25419	0.287	0.407	2.05e-44	1.64934	1.47315
HDAC5	7.47e-49	-0.22844	0.049	0.104	2.09e-44	0.55944	0.401098
GNG12	7.69e-49	-0.19844	0.088	0.159	2.15e-44	0.694732	0.557183
AC020916.1	2.63e-48	-0.26716	0.453	0.589	7.34e-44	2.69299	2.50781
PHC2	2.77e-48	-0.21247	0.064	0.125	7.73e-44	0.597683	0.450413
HECA	2.79e-48	-0.19178	0.056	0.114	7.81e-44	0.533009	0.400078
SSH1	3.46e-48	-0.18443	0.082	0.151	9.67e-44	0.701282	0.573441
MTPN	4.58e-48	-0.1856	0.053	0.11	1.28e-43	0.463877	0.335229
CSNK1E	6.28e-48	-0.24729	0.191	0.29	1.76e-43	1.22275	1.05135
ZBTB1	6.86e-48	-0.22035	0.084	0.153	1.92e-43	0.692692	0.539957
COL1A1	1.4e-47	-0.40445	0.612	0.706	3.92e-43	2.96068	2.68034
COL5A1	1.41e-47	-0.21187	0.23	0.339	3.93e-43	1.38183	1.23498
HIPK2	1.42e-47	-0.26952	0.081	0.148	3.98e-43	0.808387	0.621567
FILIP1L	1.52e-47	-0.27134	0.214	0.316	4.26e-43	1.51567	1.3276
SLC44A1	1.73e-47	-0.20533	0.071	0.135	4.84e-43	0.618115	0.475788
PTGES3	1.99e-47	-0.21889	0.116	0.195	5.56e-43	0.841678	0.689955
MAPK1IP1L	2.42e-47	-0.16349	0.096	0.169	6.77e-43	0.714741	0.601415
GLIPR1	2.42e-47	-0.28715	0.112	0.188	6.77e-43	0.904003	0.704967
CARMN	6.09e-47	0.966931	0.443	0.376	1.7e-42	2.20728	2.8775
RBMS1	6.59e-47	-0.20023	0.317	0.445	1.84e-42	1.6708	1.53201
NBL1	6.93e-47	-0.20816	0.118	0.198	1.94e-42	0.857855	0.713568
ZNF516	9.54e-47	-0.23072	0.142	0.228	2.67e-42	0.99458	0.834655
FBN1	1.04e-46	-0.26224	0.248	0.359	2.89e-42	1.51731	1.33554
TTC3	1.09e-46	-0.23615	0.428	0.562	3.04e-42	2.09034	1.92665
MAN1A1	1.16e-46	-0.21072	0.095	0.167	3.24e-42	0.7237	0.577637
IRF2BP2	1.63e-46	-0.17122	0.17	0.268	4.54e-42	1.08685	0.968167
LAPTM4A	1.65e-46	-0.1671	0.112	0.19	4.6e-42	0.766144	0.650318
KLF13	1.79e-46	-0.19094	0.089	0.159	4.99e-42	0.724437	0.592089
ABL2	3.75e-46	-0.11279	0.278	0.399	1.05e-41	1.83454	1.75636
RGS2	3.84e-46	-0.27983	0.121	0.2	1.07e-41	1.1209	0.926936
BLOC1S6	5.13e-46	-0.16582	0.101	0.175	1.43e-41	0.747444	0.632508
UBE2B	5.84e-46	-0.17027	0.136	0.222	1.63e-41	0.922458	0.804434
SLC7A6	6.41e-46	-0.2203	0.059	0.115	1.79e-41	0.591523	0.438823
KLF6	7.17e-46	-0.2683	0.392	0.511	2e-41	2.28072	2.09476
EMP1	1.41e-45	-0.18636	0.296	0.412	3.93e-41	1.9586	1.82943
AHCYL1	1.61e-45	-0.20319	0.199	0.3	4.5e-41	1.24732	1.10648
PLEKHG1	2.6e-45	-0.17074	0.055	0.111	7.26e-41	0.505975	0.38763
RAI14	2.85e-45	-0.28573	0.115	0.191	7.95e-41	0.965701	0.767647
GASK1B	2.92e-45	-0.18339	0.049	0.102	8.15e-41	0.455384	0.328265
AC005261.1	3.38e-45	-0.22206	0.124	0.204	9.43e-41	0.957392	0.803473
FKBP1A	3.51e-45	-0.19806	0.073	0.135	9.81e-41	0.626289	0.489001
PYGO1	4.84e-45	-0.19529	0.056	0.111	1.35e-40	0.510434	0.375072
SYNJ2	1.17e-44	-0.25295	0.087	0.154	3.27e-40	0.808707	0.633374
SDCBP	1.29e-44	-0.17073	0.099	0.171	3.59e-40	0.761322	0.642978
KDM7A	1.3e-44	-0.19776	0.104	0.177	3.64e-40	0.805244	0.668169
ATXN1	1.62e-44	-0.17442	0.205	0.308	4.51e-40	1.23665	1.11576
SYAP1	1.69e-44	-0.2244	0.122	0.201	4.71e-40	0.956539	0.800997
MSI2	1.89e-44	-0.14848	0.149	0.237	5.27e-40	1.03679	0.933867
SEC24D	2.07e-44	-0.20306	0.147	0.233	5.79e-40	1.01457	0.873825
ETS2	2.7e-44	-0.24762	0.09	0.158	7.54e-40	0.800949	0.629312
KDM6B	3.19e-44	-0.18331	0.21	0.311	8.91e-40	1.54455	1.41749
COL6A3	5.37e-44	-0.29531	0.565	0.672	1.5e-39	2.72806	2.52337
GJA1	7.75e-44	-0.27396	0.082	0.146	2.17e-39	0.709716	0.519822
SRSF3	8.52e-44	-0.21914	0.203	0.305	2.38e-39	1.26599	1.1141
ABL1	8.62e-44	-0.2	0.121	0.198	2.41e-39	0.885573	0.746941
PELI2	9.85e-44	-0.17237	0.05	0.103	2.75e-39	0.480019	0.360543
NAMPT	1.02e-43	-0.27069	0.28	0.391	2.84e-39	1.84818	1.66055
THBS1	1.39e-43	-0.30972	0.475	0.585	3.9e-39	2.80674	2.59206
LATS2	2.18e-43	-0.16458	0.086	0.153	6.08e-39	0.686946	0.572868
PDE10A	2.48e-43	-0.23658	0.199	0.294	6.92e-39	1.446	1.28202
HIF1A	2.9e-43	-0.23348	0.216	0.317	8.09e-39	1.37627	1.21444
CALU	4.08e-43	-0.17928	0.172	0.265	1.14e-38	1.11424	0.98997
UBE2D3	4.15e-43	-0.20467	0.319	0.441	1.16e-38	1.64147	1.4996
PWWP3B	7.29e-43	-0.30357	0.075	0.135	2.04e-38	0.76983	0.559409
SH3PXD2A	1.06e-42	-0.24308	0.195	0.29	2.97e-38	1.2807	1.11221
DUXAP8	1.54e-42	-0.25502	0.144	0.224	4.32e-38	1.08757	0.910807
SIK2	1.71e-42	-0.15433	0.14	0.224	4.79e-38	0.980543	0.873569
YBX3	2.68e-42	-0.22918	0.4	0.521	7.49e-38	2.07908	1.92022
SLC20A1	3.68e-42	-0.27311	0.122	0.196	1.03e-37	1.04429	0.85499
CCNH	5.73e-42	-0.13885	0.129	0.209	1.6e-37	0.91608	0.819839
CYBRD1	7.24e-42	-0.18732	0.088	0.154	2.02e-37	0.678595	0.548752
IER5L	7.77e-42	-0.18532	0.057	0.111	2.17e-37	0.542455	0.414003
BAG3	1.03e-41	-0.19085	0.056	0.109	2.87e-37	0.589642	0.457357
IGF1R	1.4e-41	-0.29356	0.174	0.262	3.9e-37	1.20706	1.00358
ARL5B	1.43e-41	-0.17151	0.061	0.116	3.99e-37	0.516771	0.397891
INTS6	1.52e-41	-0.21281	0.227	0.33	4.25e-37	1.39543	1.24792
FGF2	1.69e-41	-0.35408	0.073	0.131	4.72e-37	0.729518	0.484088
PNRC1	1.69e-41	-0.25257	0.217	0.314	4.73e-37	1.35959	1.18451
WEE1	1.73e-41	-0.25568	0.233	0.331	4.84e-37	1.57462	1.3974
STARD13	1.95e-41	-0.24048	0.095	0.161	5.45e-37	0.782714	0.616026
TAOK1	2e-41	-0.17887	0.172	0.262	5.57e-37	1.09047	0.966494
CSNK1A1	2.53e-41	-0.20609	0.423	0.554	7.08e-37	2.00843	1.86558
VIM	2.76e-41	-0.16644	0.516	0.648	7.71e-37	2.45779	2.34242
AC016831.1	2.94e-41	-0.21234	0.102	0.171	8.2e-37	0.839457	0.692271
CCDC50	5.33e-41	-0.20433	0.132	0.209	1.49e-36	0.928451	0.786824
BMERB1	6.11e-41	-0.25292	0.07	0.127	1.71e-36	0.702289	0.526977
ATP13A3	6.32e-41	-0.21119	0.21	0.305	1.77e-36	1.32887	1.18248
ADAMTS2	7.21e-41	-0.21923	0.08	0.14	2.01e-36	0.692781	0.540825
IFRD1	8.12e-41	-0.16897	0.171	0.26	2.27e-36	1.1329	1.01578
CTDSP2	8.19e-41	-0.14179	0.076	0.137	2.29e-36	0.601885	0.5036
CHD1	9.89e-41	-0.20146	0.316	0.434	2.76e-36	1.73129	1.59164
TRAM2	1.06e-40	-0.16888	0.068	0.125	2.97e-36	0.570548	0.453492
USP22	1.21e-40	-0.15539	0.137	0.217	3.38e-36	0.915324	0.807619
AC016831.5	1.3e-40	-0.17991	0.157	0.242	3.62e-36	1.05191	0.927204
TRA2B	1.43e-40	-0.18164	0.362	0.491	3.98e-36	1.81619	1.69029
UAP1	1.46e-40	-0.23892	0.13	0.206	4.07e-36	1.08697	0.921361
RAB21	1.46e-40	-0.14577	0.119	0.195	4.09e-36	0.845168	0.744131
PTPN14	1.49e-40	-0.21971	0.066	0.121	4.15e-36	0.631477	0.479185
SDK1	2.25e-40	-0.294	0.084	0.145	6.28e-36	0.789148	0.585361
PDGFRB	3.97e-40	-0.3065	0.259	0.36	1.11e-35	1.69584	1.48339
LRPAP1	4.26e-40	-0.2429	0.114	0.185	1.19e-35	0.959279	0.790912
ITSN1	6.21e-40	-0.25705	0.136	0.214	1.73e-35	1.0507	0.872524
RUNX1	8.42e-40	-0.19302	0.14	0.219	2.35e-35	1.05335	0.919557
GUCY1A2	9.07e-40	-0.25834	0.066	0.12	2.53e-35	0.683187	0.504116
GREB1	9.4e-40	-0.24936	0.239	0.338	2.63e-35	1.57353	1.40068
MAP4K5	9.4e-40	-0.15305	0.163	0.25	2.63e-35	1.04171	0.935626
CLIC4	9.76e-40	-0.18254	0.104	0.173	2.73e-35	0.752027	0.625503
ECM1	9.8e-40	-0.25797	0.07	0.125	2.74e-35	0.659879	0.481069
MOSMO	9.91e-40	-0.17427	0.094	0.159	2.77e-35	0.729036	0.608238
ATP6V0A1	1.04e-39	-0.2034	0.172	0.259	2.91e-35	1.1706	1.02962
MIR503HG	1.12e-39	-0.37176	0.093	0.155	3.14e-35	1.01357	0.75589
ELK4	2.42e-39	-0.17686	0.09	0.153	6.76e-35	0.705926	0.583333
ADAM17	2.47e-39	-0.18093	0.195	0.291	6.91e-35	1.2559	1.1305
AC092807.3	2.75e-39	-0.16748	0.059	0.112	7.68e-35	0.60995	0.493864
CCN1	4.29e-39	-0.27182	0.337	0.443	1.2e-34	2.34036	2.15196
DLEU2	4.91e-39	-0.18227	0.061	0.114	1.37e-34	0.565963	0.439623
PTCH1	5.66e-39	-0.39586	0.064	0.116	1.58e-34	0.784181	0.509794
YWHAZ	6.46e-39	-0.17233	0.254	0.362	1.8e-34	1.42802	1.30858
RGCC	6.54e-39	-0.22087	0.072	0.128	1.83e-34	0.708622	0.555529
CREB3L2	6.78e-39	-0.15296	0.168	0.254	1.89e-34	1.07605	0.970032
SPIN1	7.01e-39	-0.11326	0.097	0.164	1.96e-34	0.674016	0.59551
SAR1A	7.87e-39	-0.16497	0.097	0.163	2.2e-34	0.735338	0.620988
AC104695.4	7.96e-39	-0.1572	0.053	0.102	2.22e-34	0.488909	0.379947
MYO1B	9.22e-39	-0.267	0.056	0.106	2.58e-34	0.615426	0.430359
CHORDC1	9.25e-39	-0.15948	0.176	0.263	2.58e-34	1.13646	1.02591
MIB1	1.09e-38	-0.14604	0.103	0.171	3.04e-34	0.728489	0.627263
RANBP2	1.39e-38	-0.37138	0.182	0.267	3.89e-34	1.32909	1.07167
PSAP	1.71e-38	-0.17786	0.19	0.282	4.79e-34	1.17345	1.05016
KIAA0930	1.74e-38	-0.15054	0.088	0.151	4.85e-34	0.732128	0.627782
COL27A1	1.91e-38	-0.28719	0.155	0.233	5.32e-34	1.24939	1.05032
MEG3	1.96e-38	-0.23183	0.709	0.799	5.47e-34	3.42453	3.26383
PURB	2.77e-38	-0.15024	0.094	0.159	7.73e-34	0.699193	0.595051
SH3BP5	2.78e-38	-0.16345	0.154	0.235	7.76e-34	1.06757	0.954277
RHEB	2.9e-38	-0.21007	0.057	0.107	8.11e-34	0.512214	0.366604
ERN1	2.95e-38	-0.18413	0.129	0.204	8.24e-34	0.927524	0.799895
STX12	3.37e-38	-0.16723	0.11	0.179	9.41e-34	0.816823	0.700907
DENND2A	3.91e-38	-0.24806	0.059	0.11	1.09e-33	0.617755	0.445813
HM13	6.05e-38	-0.16656	0.161	0.244	1.69e-33	1.08075	0.965302
RBM12	7.22e-38	-0.14087	0.082	0.143	2.02e-33	0.613485	0.515843
USP53	9.62e-38	-0.39305	0.181	0.263	2.69e-33	1.40782	1.13538
MTDH	1.39e-37	-0.13341	0.185	0.276	3.87e-33	1.1278	1.03532
RAB31	1.41e-37	-0.18131	0.088	0.149	3.95e-33	0.67379	0.548116
TPT1	1.51e-37	-0.16576	0.346	0.466	4.21e-33	1.82888	1.71398
ETF1	2.16e-37	-0.1371	0.112	0.181	6.04e-33	0.818364	0.723334
MAPK1	2.23e-37	-0.15445	0.108	0.176	6.22e-33	0.770651	0.663596
GOLGA3	3.03e-37	-0.16517	0.152	0.233	8.48e-33	1.01012	0.895635
A2M	3.1e-37	-0.1905	0.141	0.218	8.65e-33	1.11704	0.98499
SGK1	3.31e-37	-0.29957	0.105	0.169	9.24e-33	1.02287	0.815222
TACC1	3.7e-37	-0.31779	0.407	0.514	1.04e-32	2.21334	1.99306
TANC2	4e-37	-0.12526	0.085	0.146	1.12e-32	0.672601	0.58578
LHFPL6	4.1e-37	-0.14751	0.083	0.144	1.15e-32	0.648282	0.546035
PDXK	5.2e-37	-0.16928	0.098	0.163	1.45e-32	0.769739	0.652405
FRMD6	8.4e-37	-0.13175	0.085	0.145	2.35e-32	0.696563	0.605243
MAN2A1	9.01e-37	-0.21607	0.127	0.199	2.52e-32	0.947934	0.798164
TECR	1.03e-36	-0.11558	0.06	0.111	2.89e-32	0.542435	0.462323
ATP10D	1.05e-36	-0.12932	0.109	0.177	2.94e-32	0.801903	0.712268
ZBTB38	1.36e-36	-0.19565	0.215	0.307	3.8e-32	1.32741	1.1918
MYADM	1.52e-36	-0.18126	0.248	0.348	4.26e-32	1.49471	1.36907
KDM5B	1.76e-36	-0.22535	0.222	0.315	4.92e-32	1.34858	1.19237
Z95331.1	1.95e-36	-0.14251	0.103	0.169	5.44e-32	0.788575	0.689798
CAVIN1	2.58e-36	-0.1759	0.119	0.189	7.21e-32	0.87816	0.756235
MORF4L2	3.13e-36	-0.17783	0.139	0.214	8.76e-32	0.934817	0.811553
GABRE	4.75e-36	-0.18526	0.111	0.178	1.33e-31	0.878521	0.750106
BMPR2	5.38e-36	-0.17797	0.135	0.209	1.5e-31	0.908113	0.784753
REL	6.88e-36	-0.11026	0.167	0.251	1.92e-31	1.13558	1.05915
TBC1D4	7.17e-36	-0.1558	0.055	0.103	2e-31	0.502298	0.394308
LARP4	7.62e-36	-0.18747	0.141	0.215	2.13e-31	0.992798	0.862852
CRISPLD2	8.39e-36	-0.20866	0.532	0.643	2.34e-31	2.70501	2.56037
H6PD	8.49e-36	-0.13934	0.119	0.189	2.37e-31	0.82189	0.725305
HSPB1	1.03e-35	-0.24286	0.202	0.282	2.87e-31	1.69759	1.52925
PMP22	1.09e-35	-0.15682	0.112	0.179	3.04e-31	0.790926	0.682227
TIPARP	1.19e-35	-0.20407	0.117	0.185	3.33e-31	0.948338	0.80689
TMSB10	1.67e-35	-0.12372	0.187	0.275	4.67e-31	1.20364	1.11788
TAPBP	1.91e-35	-0.17761	0.102	0.166	5.34e-31	0.78721	0.664098
CCN4	2.04e-35	-0.21985	0.053	0.1	5.7e-31	0.606273	0.453882
ATXN7	2.08e-35	-0.1188	0.192	0.283	5.8e-31	1.17733	1.09499
EMC10	2.18e-35	-0.18459	0.061	0.111	6.09e-31	0.570178	0.442232
SARAF	2.36e-35	-0.12418	0.111	0.178	6.61e-31	0.739368	0.653289
CREB5	2.4e-35	-0.22159	0.124	0.193	6.7e-31	1.01705	0.863456
ZBTB10	2.51e-35	-0.1686	0.076	0.131	7e-31	0.610772	0.493906
AFAP1	2.69e-35	-0.15572	0.061	0.111	7.53e-31	0.564021	0.456085
EID1	2.73e-35	-0.1459	0.098	0.16	7.63e-31	0.688478	0.587348
MAT2A	2.9e-35	-0.22417	0.176	0.257	8.11e-31	1.21062	1.05523
BRD4	3.26e-35	-0.17242	0.189	0.277	9.11e-31	1.20077	1.08125
MLEC	3.27e-35	-0.15435	0.089	0.148	9.15e-31	0.667277	0.560287
MIR222HG	4.7e-35	-0.35566	0.091	0.148	1.31e-30	0.93158	0.685053
LEPR	7.5e-35	-0.3482	0.118	0.182	2.09e-30	1.15132	0.90997
COLEC12	8.56e-35	-0.17145	0.053	0.1	2.39e-30	0.502312	0.383474
NIN	1.03e-34	-0.17383	0.115	0.183	2.88e-30	0.875463	0.754971
HNRNPA0	1.12e-34	-0.16371	0.066	0.117	3.12e-30	0.517983	0.404511
NID1	1.16e-34	-0.1667	0.147	0.223	3.25e-30	0.998335	0.882787
ESYT2	1.68e-34	-0.14591	0.166	0.248	4.7e-30	1.11617	1.01504
BACH1	2e-34	-0.17706	0.131	0.202	5.58e-30	0.911716	0.78899
PDS5B	2.09e-34	-0.18712	0.172	0.253	5.85e-30	1.1349	1.0052
BZW1	2.24e-34	-0.12076	0.105	0.17	6.24e-30	0.726231	0.642529
ARRDC3	2.27e-34	-0.20493	0.111	0.176	6.35e-30	0.865966	0.723919
HERPUD1	2.77e-34	-0.17331	0.084	0.142	7.75e-30	0.677887	0.557758
PTGFRN	3.42e-34	-0.13447	0.065	0.117	9.54e-30	0.517192	0.423982
FKBP10	3.46e-34	-0.17039	0.076	0.13	9.66e-30	0.62231	0.504206
ZNF445	4.14e-34	-0.13665	0.093	0.154	1.16e-29	0.738072	0.643354
SERF2	4.7e-34	-0.13048	0.136	0.209	1.31e-29	0.86558	0.775138
MEF2D	6.6e-34	-0.12353	0.076	0.13	1.84e-29	0.597717	0.512096
PPFIA2	7.31e-34	-0.19401	0.059	0.106	2.04e-29	0.574818	0.440337
MKLN1	8.63e-34	-0.11561	0.21	0.301	2.41e-29	1.19989	1.11975
MAPKAPK2	8.67e-34	-0.16815	0.084	0.14	2.42e-29	0.671831	0.555276
GAS6	9.2e-34	-0.17944	0.116	0.182	2.57e-29	0.845133	0.720755
ADCY3	1.02e-33	-0.17659	0.06	0.108	2.85e-29	0.549349	0.426949
UBE2Z	1.03e-33	-0.16361	0.09	0.148	2.87e-29	0.68814	0.574734
CNN3	1.03e-33	-0.10019	0.114	0.181	2.89e-29	0.773882	0.704436
FAM53C	1.16e-33	-0.12614	0.075	0.129	3.24e-29	0.605099	0.517669
SEMA3C	1.27e-33	-0.22158	0.099	0.159	3.56e-29	0.827985	0.674399
KDELR2	1.28e-33	-0.17258	0.074	0.127	3.57e-29	0.576508	0.456887
CLK1	1.34e-33	-0.13855	0.277	0.382	3.75e-29	1.48024	1.3842
NCOR2	1.52e-33	-0.12709	0.22	0.313	4.25e-29	1.30888	1.22079
CAMK2N1	1.54e-33	-0.13586	0.079	0.134	4.31e-29	0.625529	0.531357
MAP3K2	1.59e-33	-0.12415	0.184	0.27	4.46e-29	1.09411	1.00806
PHF10	1.69e-33	-0.17251	0.095	0.155	4.73e-29	0.738353	0.618778
ENPEP	1.76e-33	-0.24531	0.063	0.111	4.9e-29	0.607188	0.437149
ADD3	2.21e-33	-0.16857	0.2	0.286	6.17e-29	1.26134	1.1445
AHR	3.18e-33	-0.21167	0.091	0.149	8.89e-29	0.77486	0.628143
NFIX	4.28e-33	-0.13808	0.135	0.206	1.2e-28	0.95406	0.858353
CD9	5.44e-33	-0.20074	0.058	0.105	1.52e-28	0.548546	0.409403
ARF1	6.82e-33	-0.15491	0.083	0.139	1.9e-28	0.621212	0.513835
PRKAR2A	8.42e-33	-0.13062	0.086	0.143	2.35e-28	0.686145	0.595608
DPYSL3	1.15e-32	-0.21246	0.205	0.289	3.22e-28	1.35219	1.20492
TRAK1	1.44e-32	-0.18255	0.06	0.108	4.01e-28	0.557601	0.431066
MYL12A	1.54e-32	-0.16552	0.06	0.107	4.3e-28	0.506705	0.391975
GNAQ	1.62e-32	-0.08271	0.085	0.142	4.53e-28	0.620149	0.562816
NFATC4	1.9e-32	-0.16425	0.154	0.23	5.3e-28	1.04585	0.931995
AOPEP	2.06e-32	-0.16913	0.177	0.257	5.75e-28	1.1273	1.01006
CCND2	2.15e-32	-0.13844	0.184	0.266	6e-28	1.13093	1.03497
THAP9-AS1	2.36e-32	-0.17424	0.058	0.104	6.58e-28	0.514465	0.39369
HMGN1	2.37e-32	-0.11202	0.191	0.276	6.62e-28	1.10433	1.02668
HSP90AB1	2.55e-32	-0.10391	0.249	0.344	7.12e-28	1.46906	1.39704
LAMP2	2.61e-32	-0.15751	0.087	0.143	7.3e-28	0.624579	0.515403
FOXN3	3.44e-32	-0.07937	0.159	0.237	9.6e-28	0.988146	0.93313
NNMT	3.62e-32	-0.21602	0.179	0.258	1.01e-27	1.32122	1.17149
SERPINE2	3.92e-32	-0.28061	0.056	0.102	1.1e-27	0.693969	0.499465
UBE2K	6.09e-32	-0.14892	0.095	0.154	1.7e-27	0.693396	0.590171
ACTR2	7.38e-32	-0.13031	0.115	0.18	2.06e-27	0.771604	0.681279
KPNA4	7.46e-32	-0.18134	0.11	0.172	2.08e-27	0.800084	0.674392
AKIRIN1	7.57e-32	-0.12479	0.07	0.121	2.11e-27	0.550377	0.463877
TUBA1A	1.24e-31	-0.06779	0.184	0.264	3.45e-27	1.44691	1.39992
LRRC58	1.27e-31	-0.12515	0.083	0.138	3.55e-27	0.626313	0.539563
TLE1	1.49e-31	-0.18624	0.151	0.222	4.18e-27	1.04311	0.914017
FOXO3	1.56e-31	-0.1312	0.203	0.29	4.37e-27	1.30534	1.2144
NDEL1	1.64e-31	-0.15929	0.094	0.152	4.59e-27	0.723098	0.612687
MYO1E	1.88e-31	-0.16799	0.089	0.145	5.26e-27	0.705223	0.588784
PTBP3	2.37e-31	-0.10199	0.123	0.19	6.62e-27	0.819509	0.748818
GABBR1	2.5e-31	-0.1287	0.183	0.265	6.99e-27	1.13489	1.04568
TPBG	3.02e-31	-0.14403	0.065	0.114	8.45e-27	0.532873	0.43304
AFF4	3.07e-31	-0.12615	0.345	0.46	8.58e-27	1.68552	1.59807
PCSK5	3.46e-31	-0.19799	0.085	0.139	9.65e-27	0.750845	0.613611
ARHGEF40	3.51e-31	-0.14149	0.12	0.185	9.81e-27	0.88905	0.790977
AL627171.2	3.89e-31	-0.16179	0.129	0.196	1.09e-26	0.957443	0.845302
NCOA7	5.37e-31	-0.16374	0.181	0.259	1.5e-26	1.23594	1.12244
TMEM120B	5.48e-31	-0.21826	0.07	0.119	1.53e-26	0.641097	0.489811
RHOBTB3	5.6e-31	-0.18909	0.192	0.272	1.57e-26	1.27761	1.14654
LAMC1	6.12e-31	-0.12053	0.111	0.173	1.71e-26	0.791725	0.708181
PLEC	6.19e-31	-0.1387	0.146	0.218	1.73e-26	1.01571	0.919566
CCNT1	6.59e-31	-0.07401	0.111	0.174	1.84e-26	0.775271	0.723969
CRIM1	8.33e-31	-0.20124	0.08	0.131	2.33e-26	0.701919	0.562433
EVL	8.57e-31	-0.14268	0.176	0.254	2.39e-26	1.10626	1.00736
LITAF	9.1e-31	-0.1199	0.127	0.194	2.54e-26	0.869499	0.786391
TNPO1	1.08e-30	-0.06647	0.126	0.193	3.01e-26	0.807165	0.761089
SECISBP2L	1.16e-30	-0.14124	0.135	0.203	3.23e-26	0.923596	0.825698
AGO3	1.31e-30	-0.08905	0.201	0.287	3.67e-26	1.1789	1.11718
SLC5A3	1.37e-30	-0.16591	0.14	0.208	3.83e-26	1.03764	0.922644
COL5A3	1.58e-30	-0.22351	0.06	0.105	4.43e-26	0.627279	0.472357
JMY	1.64e-30	-0.12112	0.08	0.132	4.59e-26	0.59381	0.509853
ABCC9	1.7e-30	-0.17566	0.088	0.142	4.75e-26	0.707947	0.586187
MAFG	1.73e-30	-0.11542	0.067	0.115	4.82e-26	0.540488	0.460487
IER2	1.93e-30	-0.07543	0.182	0.263	5.4e-26	1.23595	1.18366
SNX9	2.01e-30	-0.14515	0.135	0.203	5.61e-26	0.910589	0.809977
PURA	2.03e-30	-0.10077	0.151	0.224	5.68e-26	0.952076	0.882226
CFH	2.56e-30	-0.32405	0.162	0.231	7.14e-26	1.32183	1.09722
CDV3	2.85e-30	-0.12174	0.119	0.183	7.96e-26	0.834925	0.75054
TCP1	3.21e-30	-0.12563	0.071	0.12	8.98e-26	0.568297	0.481216
SUSD6	3.3e-30	-0.1434	0.057	0.102	9.22e-26	0.488509	0.389109
KLF4	3.39e-30	-0.19841	0.096	0.153	9.48e-26	0.822479	0.68495
MYO9B	3.89e-30	-0.16398	0.186	0.264	1.09e-25	1.22045	1.10679
PIM3	3.99e-30	-0.14777	0.067	0.115	1.11e-25	0.600214	0.497788
ARIH1	4.64e-30	-0.06837	0.159	0.235	1.3e-25	0.978308	0.930918
SERINC3	5e-30	-0.10657	0.108	0.169	1.4e-25	0.72092	0.647054
NUMBL	5.64e-30	-0.13848	0.098	0.155	1.58e-25	0.766528	0.670538
ROCK2	5.7e-30	-0.12602	0.203	0.288	1.59e-25	1.2277	1.14035
WIPI1	5.79e-30	-0.1439	0.066	0.114	1.62e-25	0.577375	0.47763
OSBPL8	5.84e-30	-0.0683	0.13	0.198	1.63e-25	0.832539	0.785196
CTSC	6.05e-30	-0.24447	0.064	0.11	1.69e-25	0.696898	0.527444
PIK3CA	6.47e-30	-0.12425	0.098	0.156	1.81e-25	0.719746	0.633622
SPTSSA	6.9e-30	-0.10366	0.057	0.101	1.93e-25	0.462979	0.391128
LTBP1	6.98e-30	-0.12222	0.059	0.104	1.95e-25	0.522042	0.437328
UBR4	7.16e-30	-0.13398	0.19	0.27	2e-25	1.19347	1.10061
SLIT2	7.56e-30	-0.15383	0.15	0.221	2.11e-25	1.11242	1.00579
MICAL2	8.77e-30	-0.11165	0.068	0.116	2.45e-25	0.589775	0.512383
SLC35F5	1.05e-29	-0.11259	0.131	0.198	2.94e-25	0.837381	0.759338
MRC2	1.06e-29	-0.08134	0.237	0.328	2.95e-25	1.38933	1.33296
PAPSS2	1.15e-29	-0.19395	0.057	0.101	3.21e-25	0.561516	0.427078
LASP1	1.56e-29	-0.16365	0.06	0.105	4.37e-25	0.536821	0.423386
IGF2R	1.6e-29	-0.14227	0.137	0.204	4.47e-25	0.904649	0.806034
TMEM165	1.67e-29	-0.15229	0.236	0.324	4.66e-25	1.34236	1.2368
CANX	1.71e-29	-0.15425	0.124	0.187	4.77e-25	0.82045	0.713533
PPP2CB	1.9e-29	-0.11879	0.089	0.143	5.32e-25	0.654352	0.572016
AF117829.1	1.91e-29	-0.09183	0.135	0.204	5.35e-25	0.882907	0.819252
FAT1	1.92e-29	-0.06286	0.115	0.178	5.36e-25	0.895116	0.851543
GOLGA2	1.95e-29	-0.11223	0.228	0.317	5.45e-25	1.30977	1.23198
SURF4	1.96e-29	-0.13815	0.08	0.131	5.48e-25	0.603017	0.507257
BICC1	2.02e-29	-0.13914	0.111	0.172	5.64e-25	0.822015	0.725568
CDK14	2.14e-29	-0.10087	0.104	0.163	5.97e-25	0.727218	0.657299
IGFBP5	2.19e-29	-0.17555	0.231	0.314	6.11e-25	1.72758	1.6059
COL15A1	2.49e-29	-0.15923	0.115	0.174	6.94e-25	0.842496	0.732126
SERINC5	2.5e-29	-0.12245	0.105	0.164	6.98e-25	0.793468	0.708594
LMAN1	2.74e-29	-0.13942	0.12	0.183	7.65e-25	0.819626	0.722985
TMEM167A	2.79e-29	-0.1102	0.057	0.101	7.8e-25	0.423318	0.346932
MOXD1	3.04e-29	-0.10088	0.067	0.114	8.49e-25	0.517805	0.447877
ELF1	3.63e-29	-0.11377	0.104	0.163	1.01e-24	0.777678	0.69882
TM9SF3	4.02e-29	-0.08696	0.197	0.282	1.12e-24	1.11211	1.05184
PUM1	4.11e-29	-0.12155	0.16	0.233	1.15e-24	0.984692	0.900437
CTSB	5.26e-29	-0.19772	0.204	0.284	1.47e-24	1.27235	1.13529
SERPINF1	6.28e-29	-0.147	0.119	0.181	1.75e-24	0.823428	0.721532
PRELP	6.37e-29	-0.23504	0.098	0.153	1.78e-24	0.850762	0.687841
CCNI	7.37e-29	-0.10781	0.176	0.253	2.06e-24	1.06524	0.990507
EEF2	7.78e-29	-0.10604	0.151	0.223	2.17e-24	0.958852	0.885351
IGKC	9.33e-29	-0.06662	0.116	0.18	2.61e-24	0.919531	0.873357
YAP1	1.01e-28	-0.09575	0.115	0.176	2.82e-24	0.754574	0.688203
OAZ1	1.12e-28	-0.07111	0.098	0.155	3.12e-24	0.662524	0.613235
TMEM87B	1.13e-28	-0.13422	0.058	0.102	3.15e-24	0.472817	0.379782
YWHAG	1.39e-28	-0.11219	0.064	0.109	3.88e-24	0.506768	0.429006
PPP1R15B	1.45e-28	-0.09617	0.102	0.161	4.05e-24	0.735213	0.668555
CD164	1.47e-28	-0.11386	0.12	0.183	4.1e-24	0.78457	0.705648
ACSL4	1.64e-28	-0.15337	0.099	0.155	4.57e-24	0.82391	0.7176
HES4	1.78e-28	-0.08561	0.089	0.143	4.98e-24	0.706282	0.646942
TMSB4X	1.96e-28	-0.09015	0.243	0.335	5.47e-24	1.39494	1.33245
PGM3	2.06e-28	-0.12484	0.104	0.161	5.77e-24	0.759584	0.673049
ZNF24	2.21e-28	-0.06772	0.109	0.169	6.17e-24	0.727126	0.680186
HECTD2	2.34e-28	-0.10229	0.097	0.153	6.54e-24	0.693166	0.622267
COL8A1	2.4e-28	-0.11592	0.128	0.193	6.71e-24	1.00431	0.923961
SMIM14	2.49e-28	-0.07887	0.077	0.126	6.96e-24	0.569523	0.514855
ALG13	2.55e-28	-0.10787	0.119	0.18	7.11e-24	0.83131	0.756541
AKAP13	2.55e-28	-0.14551	0.54	0.664	7.12e-24	2.36439	2.26353
EIF4EBP2	2.63e-28	-0.14377	0.066	0.111	7.34e-24	0.517333	0.417682
RORA	2.66e-28	-0.10453	0.209	0.292	7.42e-24	1.27294	1.20049
SEC61A1	2.75e-28	-0.1555	0.089	0.142	7.68e-24	0.672384	0.564596
ARID5B	2.96e-28	-0.17449	0.366	0.467	8.28e-24	1.90983	1.78889
CERT1	3.18e-28	-0.08635	0.113	0.173	8.9e-24	0.764559	0.704704
TSHZ3	3.37e-28	-0.09271	0.07	0.118	9.41e-24	0.527902	0.463637
AL158152.1	3.42e-28	-0.12004	0.131	0.196	9.55e-24	0.888253	0.805047
COL12A1	3.92e-28	-0.26528	0.283	0.367	1.1e-23	1.74848	1.5646
DMWD	4.08e-28	-0.15378	0.132	0.196	1.14e-23	0.932962	0.826373
TSC22D2	4.09e-28	-0.02222	0.13	0.195	1.14e-23	0.905577	0.890175
EIF4A1	4.55e-28	-0.10562	0.36	0.473	1.27e-23	1.80328	1.73007
CD59	4.6e-28	-0.15536	0.107	0.165	1.28e-23	0.769323	0.661636
TGOLN2	5.16e-28	-0.06162	0.152	0.224	1.44e-23	0.930555	0.887841
STAT2	5.4e-28	-0.11861	0.173	0.248	1.51e-23	1.08981	1.0076
AGPAT4	6.49e-28	-0.13581	0.129	0.192	1.81e-23	0.951386	0.85725
HMGXB3	6.61e-28	-0.13054	0.117	0.177	1.85e-23	0.834916	0.744434
SKI	7.28e-28	-0.08757	0.089	0.143	2.04e-23	0.634351	0.573655
TARBP1	7.37e-28	-0.17846	0.079	0.129	2.06e-23	0.67971	0.556008
ARHGDIA	7.89e-28	-0.1742	0.07	0.117	2.2e-23	0.588878	0.468133
YTHDF3	8.68e-28	-0.08297	0.092	0.146	2.42e-23	0.620835	0.563325
DMD	9.27e-28	0.744956	0.174	0.123	2.59e-23	0.810855	1.32722
SLC25A36	1.1e-27	-0.10064	0.24	0.33	3.06e-23	1.31566	1.2459
DYNC1H1	1.26e-27	-0.16775	0.356	0.465	3.52e-23	1.7839	1.66762
SPCS3	1.3e-27	-0.14525	0.122	0.183	3.63e-23	0.801849	0.701168
KLF3	1.61e-27	-0.08668	0.121	0.183	4.5e-23	0.838066	0.777983
NXN	1.85e-27	-0.15219	0.064	0.108	5.18e-23	0.54089	0.435398
NOTCH2	2.11e-27	-0.09229	0.085	0.137	5.9e-23	0.607362	0.543391
EBF1	2.21e-27	-0.17303	0.123	0.184	6.17e-23	0.907376	0.787438
MGRN1	2.22e-27	-0.11584	0.11	0.168	6.2e-23	0.811656	0.731361
SLC38A2	2.26e-27	-0.16574	0.312	0.411	6.31e-23	1.71689	1.60201
NFIA	2.3e-27	-0.29901	0.475	0.558	6.42e-23	2.58545	2.37819
PTAR1	2.5e-27	-0.08252	0.129	0.192	7e-23	0.818907	0.761707
SAV1	2.51e-27	-0.11424	0.076	0.125	7.02e-23	0.59336	0.514175
CYTH3	2.54e-27	-0.15832	0.067	0.112	7.09e-23	0.589521	0.479785
P4HB	2.62e-27	-0.11358	0.078	0.127	7.31e-23	0.587612	0.508884
MED13	2.67e-27	-0.13342	0.209	0.29	7.45e-23	1.20511	1.11263
SACS	2.98e-27	-0.08427	0.116	0.176	8.32e-23	0.858444	0.800033
PLEKHA4	3.06e-27	-0.17365	0.105	0.161	8.54e-23	0.886155	0.765793
CTNNB1	3.11e-27	-0.06225	0.297	0.397	8.7e-23	1.55455	1.5114
LMNA	3.25e-27	0.023036	0.457	0.583	9.08e-23	2.48669	2.50265
BSDC1	3.33e-27	-0.08245	0.129	0.193	9.3e-23	0.844796	0.787647
AZI2	3.52e-27	-0.10546	0.12	0.18	9.84e-23	0.858315	0.785215
JMJD1C	3.55e-27	-0.1687	0.387	0.493	9.91e-23	1.88565	1.76872
USP11	3.68e-27	-0.11995	0.112	0.17	1.03e-22	0.831589	0.748447
LGALS1	3.7e-27	-0.114	0.139	0.204	1.03e-22	0.925745	0.846723
JADE1	3.97e-27	-0.13305	0.095	0.149	1.11e-22	0.796038	0.703811
RPL17	4.64e-27	-0.09874	0.219	0.305	1.3e-22	1.26872	1.20028
MYH9	5.02e-27	-0.13181	0.177	0.251	1.4e-22	1.12801	1.03665
HELLPAR	5.28e-27	-0.07318	0.065	0.11	1.47e-22	0.542057	0.491331
CELF2	5.31e-27	-0.1396	0.129	0.191	1.48e-22	0.957403	0.860638
YWHAQ	5.33e-27	-0.09115	0.145	0.213	1.49e-22	0.902697	0.839515
C6orf62	5.44e-27	-0.12371	0.149	0.217	1.52e-22	0.956348	0.8706
HDLBP	5.49e-27	-0.1083	0.186	0.263	1.53e-22	1.12905	1.05398
SLCO3A1	5.87e-27	-0.12903	0.101	0.157	1.64e-22	0.773794	0.684355
TPM3	6.27e-27	-0.12041	0.172	0.244	1.75e-22	1.11638	1.03292
PTPN13	7.99e-27	-0.11217	0.143	0.21	2.23e-22	0.97681	0.89906
FAP	9.3e-27	-0.07662	0.141	0.207	2.6e-22	0.958554	0.905445
DNAJB6	1.13e-26	-0.06994	0.2	0.281	3.15e-22	1.16385	1.11537
BTG3	1.27e-26	-0.08213	0.119	0.18	3.54e-22	0.826429	0.7695
KDSR	1.35e-26	-0.09663	0.094	0.147	3.78e-22	0.67276	0.605779
RPL28	1.44e-26	-0.05994	0.204	0.285	4.02e-22	1.21999	1.17844
JUN	1.46e-26	-0.16704	0.347	0.439	4.07e-22	2.06301	1.94723
ETNK1	1.5e-26	-0.09063	0.156	0.226	4.19e-22	0.927775	0.864956
DNM1	1.66e-26	-0.07034	0.141	0.207	4.65e-22	0.929723	0.88097
YPEL2	1.68e-26	-0.23089	0.088	0.138	4.71e-22	0.789531	0.62949
SLFN11	1.72e-26	-0.10703	0.059	0.102	4.8e-22	0.51795	0.44376
MAFK	1.77e-26	-0.1053	0.089	0.141	4.95e-22	0.690901	0.617912
STEAP2	2.04e-26	-0.12729	0.19	0.266	5.69e-22	1.28472	1.19649
MEIS3	2.09e-26	-0.08058	0.079	0.127	5.83e-22	0.584826	0.528969
CDK17	2.46e-26	-0.06941	0.105	0.161	6.87e-22	0.753337	0.705228
MYO15B	2.52e-26	-0.13389	0.134	0.196	7.03e-22	0.948595	0.855792
CSNK1G2	2.54e-26	-0.11035	0.077	0.124	7.08e-22	0.61406	0.537573
RTN4	2.62e-26	-0.13019	0.306	0.401	7.31e-22	1.60322	1.51298
BNC2	2.81e-26	-0.0982	0.153	0.221	7.85e-22	0.988478	0.920413
EXT1	3.25e-26	-0.14146	0.076	0.122	9.08e-22	0.627992	0.529942
B2M	3.26e-26	-0.12711	0.354	0.457	9.09e-22	1.78511	1.697
ANKRD28	3.98e-26	-0.18623	0.231	0.31	1.11e-21	1.47567	1.34659
PLK3	4.54e-26	-0.12053	0.125	0.185	1.27e-21	0.946113	0.862566
DGKA	4.58e-26	-0.07971	0.07	0.116	1.28e-21	0.579438	0.524186
SLK	4.91e-26	-0.12532	0.162	0.231	1.37e-21	1.03269	0.945828
BNIP3L	5.02e-26	-0.10837	0.072	0.118	1.4e-21	0.543999	0.468882
ANKRD10	5.18e-26	-0.09873	0.192	0.268	1.45e-21	1.10986	1.04143
CAMK2D	5.91e-26	-0.12156	0.107	0.163	1.65e-21	0.755385	0.671126
RBFOX2	6.22e-26	-0.08977	0.167	0.237	1.74e-21	0.992192	0.929966
AMOTL1	6.81e-26	-0.10525	0.065	0.109	1.9e-21	0.514032	0.441077
SPON2	6.89e-26	-0.14809	0.179	0.25	1.92e-21	1.2496	1.14695
ABHD2	7.42e-26	-0.0795	0.071	0.116	2.07e-21	0.549162	0.494054
NUP58	7.51e-26	-0.10828	0.139	0.203	2.1e-21	0.890443	0.815392
NFAT5	7.77e-26	-0.08624	0.214	0.297	2.17e-21	1.18796	1.12818
TMOD3	8.15e-26	-0.11779	0.121	0.179	2.28e-21	0.849305	0.767657
SLC7A8	9.75e-26	-0.12145	0.091	0.142	2.72e-21	0.72701	0.642826
RPS27	1.27e-25	-0.05657	0.215	0.297	3.55e-21	1.28546	1.24625
ACTG1	1.37e-25	-0.14799	0.283	0.373	3.83e-21	1.54684	1.44426
S1PR3	1.43e-25	-0.2122	0.08	0.126	3.98e-21	0.768772	0.621684
TMED10	1.55e-25	-0.10753	0.09	0.141	4.33e-21	0.6188	0.544266
DDX3X	1.56e-25	-0.11354	0.375	0.485	4.36e-21	1.82839	1.7497
ZNF621	1.56e-25	-0.1312	0.088	0.138	4.37e-21	0.666372	0.575433
SAMD4B	1.58e-25	-0.06171	0.206	0.287	4.42e-21	1.19226	1.14949
NUCKS1	1.61e-25	-0.08064	0.195	0.271	4.49e-21	1.15818	1.10228
ANKRD10-IT1	1.64e-25	-0.07918	0.068	0.112	4.58e-21	0.485218	0.430334
PCNX4	1.65e-25	-0.13551	0.197	0.272	4.6e-21	1.23058	1.13665
DGKH	1.65e-25	-0.07858	0.18	0.254	4.61e-21	1.10315	1.04868
C5orf24	1.84e-25	-0.05935	0.087	0.137	5.14e-21	0.596621	0.555479
CDKN1A	1.86e-25	-0.1143	0.064	0.107	5.19e-21	0.535947	0.45672
JAM3	2.05e-25	-0.10427	0.062	0.104	5.72e-21	0.480944	0.408668
SAMHD1	2.28e-25	-0.11204	0.22	0.299	6.37e-21	1.48514	1.40749
WDR26	2.32e-25	-0.07095	0.107	0.163	6.48e-21	0.69809	0.64891
CSRP1	2.46e-25	-0.09278	0.19	0.264	6.88e-21	1.18375	1.11943
ST13	2.92e-25	-0.05936	0.099	0.152	8.16e-21	0.660091	0.618949
LRRC41	3.05e-25	-0.09168	0.076	0.122	8.51e-21	0.553304	0.489754
SSPN	3.09e-25	-0.08558	0.06	0.101	8.64e-21	0.454404	0.395085
RAB1A	3.13e-25	-0.05458	0.069	0.114	8.75e-21	0.487943	0.45011
EFR3A	3.21e-25	-0.07333	0.065	0.108	8.96e-21	0.511201	0.460375
EDEM3	3.27e-25	-0.05595	0.083	0.132	9.14e-21	0.57724	0.538461
SQSTM1	3.31e-25	-0.07679	0.198	0.275	9.24e-21	1.25439	1.20116
SEPTIN2	3.46e-25	-0.11505	0.232	0.315	9.66e-21	1.2462	1.16645
MMP14	3.75e-25	-0.09496	0.085	0.134	1.05e-20	0.60744	0.541619
PANK3	3.81e-25	-0.09144	0.098	0.151	1.07e-20	0.671356	0.607972
SNTB2	3.88e-25	-0.15364	0.098	0.15	1.09e-20	0.720108	0.613613
ACBD3	3.94e-25	-0.10738	0.09	0.14	1.1e-20	0.673042	0.598611
GUK1	4.05e-25	-0.11757	0.075	0.12	1.13e-20	0.610364	0.528868
PALM2-AKAP2	4.1e-25	-0.13635	0.093	0.144	1.15e-20	0.755953	0.661441
ARHGAP32	4.13e-25	-0.07955	0.072	0.118	1.15e-20	0.550756	0.495617
PLAT	4.61e-25	-0.23417	0.103	0.154	1.29e-20	0.986362	0.824047
XAF1	4.77e-25	-0.1317	0.247	0.33	1.33e-20	1.45368	1.3624
CELF1	5.38e-25	-0.08833	0.225	0.308	1.5e-20	1.25749	1.19626
TRIO	5.75e-25	-0.09245	0.223	0.303	1.61e-20	1.31951	1.25543
GLIS3	6.09e-25	-0.04344	0.15	0.216	1.7e-20	1.06202	1.03191
PRNP	6.44e-25	-0.11998	0.089	0.138	1.8e-20	0.624612	0.541445
YWHAB	6.77e-25	-0.10327	0.155	0.221	1.89e-20	0.964386	0.892807
ATL3	6.94e-25	-0.09228	0.067	0.11	1.94e-20	0.482153	0.418189
NUFIP2	7.14e-25	-0.04835	0.187	0.262	2e-20	1.06581	1.0323
Z83843.1	7.55e-25	-0.04915	0.204	0.283	2.11e-20	1.10805	1.07398
KDM4B	7.61e-25	-0.09219	0.124	0.183	2.13e-20	0.854704	0.790803
NAA50	7.81e-25	-0.07544	0.068	0.113	2.18e-20	0.507295	0.455002
ADH1B	7.85e-25	0.612591	0.134	0.088	2.19e-20	0.700019	1.12464
UBN2	8.8e-25	-0.06451	0.18	0.254	2.46e-20	1.06802	1.0233
AEBP1	9e-25	-0.17917	0.275	0.362	2.51e-20	1.57699	1.4528
PAM	9.9e-25	-0.06595	0.133	0.194	2.77e-20	0.84013	0.794414
INPP4A	1.04e-24	-0.12345	0.079	0.125	2.91e-20	0.609954	0.524388
CAV1	1.08e-24	-0.23013	0.079	0.124	3.03e-20	0.72595	0.566435
IDS	1.36e-24	-0.08903	0.233	0.315	3.81e-20	1.26132	1.19961
SASH1	1.71e-24	-0.1636	0.105	0.157	4.76e-20	0.8309	0.717503
ARFGAP1	1.78e-24	-0.19063	0.076	0.12	4.98e-20	0.680441	0.548309
HSPA5	1.8e-24	-0.09369	0.115	0.172	5.03e-20	0.808618	0.74368
ZSWIM6	1.81e-24	-0.13867	0.086	0.134	5.05e-20	0.686035	0.58992
LARP4B	1.81e-24	-0.09702	0.09	0.14	5.06e-20	0.653126	0.585873
CRY2	1.93e-24	-0.08522	0.072	0.116	5.4e-20	0.568598	0.509531
NBEAL1	1.95e-24	-0.05755	0.187	0.262	5.45e-20	1.08992	1.05002
PITPNB	2.17e-24	-0.06639	0.136	0.199	6.06e-20	0.877216	0.831197
TGFBR1	2.27e-24	-0.07394	0.085	0.134	6.35e-20	0.612111	0.560856
GNAI3	2.33e-24	-0.07403	0.09	0.14	6.51e-20	0.661244	0.609931
PPP2CA	2.59e-24	-0.10877	0.06	0.101	7.23e-20	0.492372	0.416981
PPP4R2	2.7e-24	-0.09402	0.108	0.163	7.56e-20	0.728402	0.663234
GPCPD1	2.74e-24	-0.08854	0.134	0.195	7.65e-20	0.878309	0.81694
EIF4G2	2.88e-24	-0.08891	0.25	0.337	8.04e-20	1.33185	1.27023
RBM14	2.9e-24	-0.17024	0.077	0.123	8.1e-20	0.643965	0.525965
IMPAD1	2.97e-24	-0.09695	0.065	0.106	8.3e-20	0.4744	0.407203
ARHGEF7	3.03e-24	-0.10947	0.097	0.148	8.46e-20	0.702354	0.626474
PRMT9	3.08e-24	-0.29546	0.076	0.119	8.6e-20	0.757961	0.553161
GCC2	3.12e-24	-0.11506	0.3	0.394	8.71e-20	1.59833	1.51857
COL16A1	3.3e-24	-0.07098	0.232	0.316	9.21e-20	1.43748	1.38827
UBE2G2	3.35e-24	-0.10277	0.225	0.305	9.35e-20	1.27093	1.19969
XBP1	3.52e-24	-0.10391	0.12	0.176	9.84e-20	0.821351	0.749328
FAM102B	3.83e-24	-0.09028	0.06	0.1	1.07e-19	0.507409	0.444831
SMAD5	4.08e-24	-0.08376	0.151	0.216	1.14e-19	0.928136	0.87008
BICD1	4.25e-24	-0.12896	0.108	0.162	1.19e-19	0.772109	0.682722
UBXN7	4.78e-24	-0.08499	0.093	0.143	1.34e-19	0.649103	0.590191
COPB2	4.85e-24	-0.12825	0.104	0.156	1.35e-19	0.739046	0.650147
STOM	5.22e-24	-0.13399	0.07	0.113	1.46e-19	0.555531	0.462653
CTNNA1	5.23e-24	-0.10161	0.119	0.175	1.46e-19	0.790727	0.720299
ARSG	5.44e-24	-0.09194	0.06	0.1	1.52e-19	0.539156	0.475425
CCDC71L	6.49e-24	-0.14148	0.08	0.126	1.81e-19	0.688089	0.590023
HNRNPA2B1	6.72e-24	-0.13945	0.691	0.783	1.88e-19	2.71136	2.6147
PTP4A2	8.45e-24	-0.08814	0.146	0.209	2.36e-19	0.927837	0.866746
UBL3	8.52e-24	-0.08929	0.079	0.125	2.38e-19	0.561501	0.499608
SUB1	9.08e-24	-0.08088	0.099	0.15	2.54e-19	0.65634	0.60028
QKI	9.41e-24	-0.09127	0.222	0.303	2.63e-19	1.23213	1.16887
FBLIM1	9.42e-24	-0.15313	0.099	0.148	2.63e-19	0.737768	0.631626
FAM106A	9.51e-24	-0.16468	0.068	0.11	2.66e-19	0.573416	0.459266
SCML1	1.07e-23	-0.08507	0.082	0.129	2.99e-19	0.598097	0.539134
ANXA5	1.14e-23	-0.08952	0.269	0.358	3.18e-19	1.51859	1.45655
UFM1	1.3e-23	-0.08712	0.111	0.165	3.63e-19	0.715089	0.654699
VCL	1.43e-23	-0.17484	0.299	0.384	3.99e-19	1.6566	1.53541
RPL13	1.44e-23	-0.08932	0.349	0.453	4.03e-19	1.8436	1.78169
XIAP	1.8e-23	-0.08397	0.117	0.173	5.02e-19	0.770926	0.71272
WTIP	1.9e-23	-0.07964	0.07	0.113	5.3e-19	0.563276	0.508075
EML4	1.97e-23	-0.08568	0.172	0.24	5.51e-19	1.06833	1.00894
NHLRC3	2.11e-23	-0.09934	0.107	0.159	5.89e-19	0.716607	0.647753
GFPT1	2.28e-23	-0.08861	0.098	0.149	6.37e-19	0.685607	0.624189
DDX27	2.37e-23	-0.16059	0.162	0.227	6.63e-19	1.11263	1.00132
ARHGEF10	2.39e-23	-0.11913	0.178	0.246	6.68e-19	1.13275	1.05018
CD63	2.47e-23	-0.08815	0.138	0.199	6.91e-19	0.880754	0.81965
NUDT4	2.73e-23	-0.15579	0.086	0.132	7.62e-19	0.743882	0.635895
RPS29	2.78e-23	-0.10942	0.159	0.223	7.77e-19	1.00251	0.926666
DCLK1	2.89e-23	-0.2195	0.097	0.146	8.07e-19	0.882827	0.730679
TYMP	3.07e-23	-0.08177	0.108	0.161	8.57e-19	0.833321	0.776641
LAMP1	3.09e-23	-0.14065	0.085	0.131	8.63e-19	0.62092	0.523432
WNT5A	3.09e-23	-0.18584	0.074	0.116	8.63e-19	0.677165	0.548348
CBX5	3.22e-23	-0.07135	0.097	0.148	8.99e-19	0.662824	0.613364
FKBP5	3.63e-23	-0.16004	0.228	0.305	1.01e-18	1.54225	1.43132
DTWD1	3.64e-23	-0.08547	0.152	0.215	1.02e-18	0.951859	0.892614
NR2F2	3.67e-23	-0.0559	0.201	0.277	1.03e-18	1.20966	1.17091
DENND5A	3.87e-23	-0.13695	0.071	0.113	1.08e-18	0.589398	0.49447
GNAS	4.02e-23	-0.06604	0.241	0.326	1.12e-18	1.31281	1.26703
MAST2	4.26e-23	-0.11277	0.09	0.138	1.19e-18	0.68041	0.602244
GSK3B	4.26e-23	-0.12678	0.084	0.13	1.19e-18	0.599675	0.511798
PJA2	5.03e-23	-0.06683	0.203	0.28	1.41e-18	1.11447	1.06815
ZNF131	6.69e-23	-0.10144	0.099	0.149	1.87e-18	0.697343	0.627031
PVT1	6.93e-23	-0.14645	0.089	0.135	1.94e-18	0.71117	0.609659
NF1	7.13e-23	-0.07499	0.224	0.304	1.99e-18	1.22365	1.17167
RPL37	7.38e-23	-0.0098	0.233	0.317	2.06e-18	1.30982	1.30303
SEC22B	7.4e-23	-0.07573	0.098	0.148	2.07e-18	0.654316	0.601822
SULF1	7.59e-23	-0.147	0.191	0.258	2.12e-18	1.28919	1.18729
PANK2	7.64e-23	-0.11267	0.074	0.117	2.14e-18	0.585326	0.50723
CCDC14	7.98e-23	-0.06001	0.22	0.299	2.23e-18	1.21284	1.17124
HYMAI	8.5e-23	-0.19184	0.126	0.18	2.38e-18	0.949915	0.816939
RPL3	9.34e-23	-0.0915	0.185	0.257	2.61e-18	1.14353	1.08011
MAPK6	9.51e-23	-0.12495	0.085	0.131	2.66e-18	0.621403	0.534794
TXLNA	9.57e-23	-0.04735	0.103	0.155	2.67e-18	0.701606	0.668783
Z97200.1	1.08e-22	-0.12386	0.07	0.111	3.02e-18	0.594705	0.508854
MAP3K20	1.1e-22	-0.0956	0.153	0.216	3.06e-18	0.985741	0.919476
BDH2	1.26e-22	-0.04037	0.12	0.176	3.52e-18	0.775774	0.747791
GADD45B	1.6e-22	-0.04873	0.13	0.188	4.47e-18	1.07152	1.03774
BRD2	1.63e-22	-0.07851	0.147	0.209	4.56e-18	0.955257	0.900838
ZKSCAN1	1.66e-22	-0.06697	0.262	0.348	4.63e-18	1.40396	1.35754
CSNK1D	1.94e-22	-0.10048	0.14	0.199	5.41e-18	0.913633	0.843985
SKP1	1.94e-22	-0.05543	0.162	0.227	5.43e-18	0.971571	0.933148
ANTXR1	2e-22	-0.08763	0.104	0.155	5.59e-18	0.708827	0.648088
TMEM30A	2.01e-22	-0.07678	0.079	0.123	5.61e-18	0.529552	0.476335
PHF14	2.01e-22	-0.05803	0.201	0.276	5.62e-18	1.14308	1.10285
LRCH3	2.22e-22	-0.04139	0.161	0.227	6.2e-18	0.95407	0.925381
NASP	2.32e-22	-0.0961	0.22	0.297	6.49e-18	1.30053	1.23391
HIVEP2	2.34e-22	-0.07065	0.084	0.13	6.53e-18	0.622492	0.573523
CRTC3	2.4e-22	-0.08565	0.084	0.13	6.72e-18	0.625171	0.565802
DDX39B	2.52e-22	-0.0572	0.26	0.349	7.03e-18	1.35021	1.31056
H3F3A	2.64e-22	-0.06319	0.125	0.181	7.37e-18	0.769564	0.72576
SELENOW	2.77e-22	-0.03477	0.133	0.192	7.75e-18	0.839303	0.815201
HDAC7	2.85e-22	-0.12488	0.189	0.258	7.97e-18	1.16963	1.08307
PRRC1	2.95e-22	-0.08562	0.072	0.114	8.25e-18	0.533688	0.474342
RPS6KA3	3.38e-22	-0.0721	0.091	0.138	9.45e-18	0.665192	0.615214
GLG1	3.4e-22	-0.06595	0.202	0.276	9.51e-18	1.12414	1.07843
ATP5F1E	3.44e-22	-0.10173	0.099	0.148	9.61e-18	0.7025	0.631983
IFITM3	3.63e-22	-0.05298	0.132	0.191	1.01e-17	0.821844	0.785119
SPART	4.02e-22	-0.05871	0.188	0.26	1.12e-17	1.10704	1.06635
TBL1XR1	4.03e-22	-0.04549	0.147	0.21	1.13e-17	0.883669	0.852135
WDR1	4.19e-22	-0.11996	0.062	0.1	1.17e-17	0.512579	0.429432
LINC-PINT	4.6e-22	-0.08744	0.297	0.39	1.28e-17	1.53072	1.47011
TBC1D16	5.97e-22	-0.0715	0.071	0.113	1.67e-17	0.549951	0.500392
RNPS1	6.26e-22	-0.05808	0.134	0.192	1.75e-17	0.852489	0.812231
TMEM245	7.17e-22	-0.08113	0.091	0.138	2e-17	0.658784	0.602551
CMIP	7.51e-22	-0.10563	0.065	0.104	2.1e-17	0.560795	0.487579
SERINC1	7.68e-22	-0.09431	0.097	0.145	2.15e-17	0.64365	0.578281
ADGRA2	7.94e-22	-0.07119	0.08	0.124	2.22e-17	0.550377	0.501034
ADNP	8.41e-22	-0.05649	0.112	0.166	2.35e-17	0.71883	0.679674
TTN-AS1	8.76e-22	-0.07854	0.104	0.154	2.45e-17	0.727549	0.67311
SELENOH	9.16e-22	-0.06677	0.071	0.112	2.56e-17	0.50824	0.461959
DYRK2	9.66e-22	-0.08911	0.065	0.105	2.7e-17	0.489619	0.427855
TMBIM6	9.67e-22	-0.06682	0.138	0.196	2.7e-17	0.84091	0.794597
SEC61B	9.68e-22	-0.04684	0.068	0.109	2.7e-17	0.470167	0.437699
RPS16	1.05e-21	-0.06437	0.151	0.213	2.95e-17	0.937984	0.893365
RPL11	1.08e-21	-0.03516	0.232	0.314	3.01e-17	1.30289	1.27852
PXDN	1.08e-21	-0.083	0.168	0.232	3.03e-17	1.06606	1.00853
OSMR	1.22e-21	-0.03271	0.116	0.17	3.42e-17	0.791346	0.768676
MLLT6	1.24e-21	-0.08703	0.186	0.255	3.46e-17	1.11657	1.05624
KLHL42	1.29e-21	-0.06765	0.093	0.14	3.59e-17	0.662513	0.61562
HCG18	1.29e-21	-0.06622	0.273	0.361	3.6e-17	1.42609	1.38019
RCN1	1.34e-21	-0.13517	0.078	0.121	3.73e-17	0.572622	0.478926
EIF4G3	1.5e-21	-0.06906	0.15	0.211	4.18e-17	0.930684	0.882813
SEPTIN7	1.61e-21	-0.0081	0.238	0.322	4.49e-17	1.25129	1.24568
TRAF5	1.62e-21	-0.0979	0.112	0.164	4.54e-17	0.800225	0.732367
ERGIC1	1.63e-21	-0.08342	0.144	0.204	4.55e-17	0.936283	0.878462
DSTYK	1.67e-21	-0.11129	0.081	0.125	4.67e-17	0.619431	0.542293
GNL1	1.81e-21	-0.0963	0.079	0.122	5.05e-17	0.607733	0.540981
LDHA	1.87e-21	-0.07832	0.093	0.14	5.22e-17	0.704187	0.649902
RPL15	2.42e-21	-0.0569	0.131	0.187	6.77e-17	0.80542	0.765977
ARL17B	2.58e-21	-0.09713	0.062	0.1	7.2e-17	0.51987	0.452544
RPL35	2.61e-21	-0.07884	0.147	0.207	7.29e-17	0.934325	0.879679
FAM177A1	2.65e-21	-0.10993	0.089	0.134	7.39e-17	0.667146	0.590947
XRRA1	3.14e-21	-0.08176	0.092	0.138	8.77e-17	0.66764	0.61097
FNDC3B	3.17e-21	-0.06082	0.262	0.348	8.85e-17	1.39049	1.34833
CASK	3.17e-21	-0.09025	0.075	0.116	8.87e-17	0.560292	0.497736
HOOK3	3.21e-21	-0.04984	0.215	0.291	8.98e-17	1.2005	1.16596
SESTD1	3.65e-21	-0.05023	0.088	0.134	1.02e-16	0.618783	0.583966
LSAMP	3.81e-21	-0.10562	0.096	0.143	1.06e-16	0.68856	0.615351
CAP1	3.96e-21	-0.10989	0.083	0.126	1.11e-16	0.623876	0.547708
ZNF217	4.03e-21	-0.09866	0.076	0.118	1.13e-16	0.583966	0.515581
PGM2L1	4.51e-21	-0.02666	0.136	0.193	1.26e-16	0.942195	0.923715
ATF4	4.72e-21	-0.08573	0.141	0.2	1.32e-16	0.893654	0.834229
ZBTB7A	5.3e-21	-0.08582	0.211	0.282	1.48e-16	1.27919	1.21971
FLRT2	5.3e-21	-0.12848	0.092	0.138	1.48e-16	0.706766	0.617708
BIRC2	5.44e-21	-0.06901	0.094	0.14	1.52e-16	0.630098	0.582264
JAK1	5.6e-21	-0.0378	0.2	0.273	1.57e-16	1.15515	1.12895
FAM91A1	5.66e-21	-0.09887	0.077	0.119	1.58e-16	0.566226	0.497691
TAGLN2	5.87e-21	-0.04295	0.1	0.149	1.64e-16	0.67859	0.648816
ZBTB11	5.99e-21	-0.13178	0.072	0.113	1.67e-16	0.579381	0.488038
COPB1	6.18e-21	-0.05848	0.094	0.141	1.73e-16	0.643368	0.602831
GOLIM4	6.2e-21	-0.09992	0.089	0.134	1.73e-16	0.64516	0.5759
TRIM8	6.48e-21	-0.05661	0.095	0.142	1.81e-16	0.668825	0.629583
STXBP5	7.53e-21	-0.06625	0.105	0.154	2.1e-16	0.720771	0.674847
CLSTN1	7.95e-21	-0.05936	0.072	0.113	2.22e-16	0.505061	0.463916
HAND2	8.23e-21	0.502053	0.108	0.071	2.3e-16	0.458913	0.80691
HMBOX1	8.33e-21	-0.05545	0.084	0.128	2.33e-16	0.582649	0.544211
TULP4	8.55e-21	-0.08506	0.094	0.14	2.39e-16	0.642433	0.583471
APBB2	8.66e-21	-0.09031	0.1	0.148	2.42e-16	0.725344	0.662748
ASPH	8.73e-21	-0.13234	0.147	0.204	2.44e-16	0.96874	0.877006
SETD7	8.83e-21	-0.06543	0.068	0.108	2.47e-16	0.482953	0.437602
RNMT	9.05e-21	-0.06974	0.209	0.281	2.53e-16	1.21913	1.17079
RPLP0	1.03e-20	-0.04369	0.168	0.233	2.88e-16	0.991049	0.960769
SMARCC1	1.11e-20	-0.10024	0.121	0.174	3.11e-16	0.832557	0.763076
ELK3	1.13e-20	-0.02633	0.117	0.17	3.15e-16	0.805725	0.787476
PNRC2	1.16e-20	-0.06916	0.09	0.135	3.24e-16	0.621947	0.57401
SERP1	1.17e-20	-0.09212	0.091	0.136	3.27e-16	0.620205	0.556354
RPS27A	1.38e-20	-0.05989	0.171	0.236	3.86e-16	1.0675	1.02599
PLPP1	1.44e-20	-0.10893	0.065	0.102	4.01e-16	0.48263	0.407127
ZBTB20	1.55e-20	-0.11645	0.423	0.519	4.33e-16	1.95962	1.8789
SP1	1.57e-20	-0.05907	0.064	0.102	4.38e-16	0.47433	0.433389
GPRC5A	1.69e-20	-0.04046	0.2	0.268	4.73e-16	1.47703	1.44898
RPL39	1.76e-20	-0.03471	0.172	0.237	4.92e-16	1.08422	1.06016
REST	1.87e-20	-0.06178	0.083	0.127	5.24e-16	0.592424	0.549604
TRIM38	1.91e-20	-0.08459	0.149	0.207	5.33e-16	0.972637	0.914006
SFT2D2	1.91e-20	-0.04317	0.117	0.169	5.34e-16	0.736098	0.706176
C3	2.15e-20	-0.22044	0.194	0.257	6.02e-16	1.4415	1.2887
LINC01578	2.4e-20	-0.06734	0.227	0.302	6.71e-16	1.23415	1.18748
ADGRD1	2.45e-20	-0.07059	0.125	0.178	6.84e-16	0.860471	0.81154
ARPC2	2.5e-20	-0.07261	0.243	0.32	6.97e-16	1.32977	1.27944
ATP2B1	2.72e-20	-0.09048	0.122	0.174	7.61e-16	0.831501	0.768788
ABI2	2.86e-20	-0.07169	0.203	0.273	8e-16	1.14652	1.09683
ERF	2.91e-20	-0.02453	0.075	0.117	8.14e-16	0.573473	0.556468
RPL7	3.02e-20	-0.05575	0.146	0.204	8.44e-16	0.901849	0.863208
TAGLN	3.15e-20	-0.14596	0.288	0.367	8.79e-16	1.85378	1.75261
RAC1	3.28e-20	-0.0602	0.136	0.192	9.16e-16	0.846603	0.804875
ZRANB1	3.31e-20	-0.09467	0.135	0.19	9.24e-16	0.902248	0.836626
DOCK1	3.33e-20	-0.03984	0.143	0.202	9.3e-16	0.887078	0.859464
PTMA	3.36e-20	-0.11999	0.401	0.5	9.38e-16	2.03444	1.95127
PLSCR4	3.39e-20	-0.1014	0.09	0.134	9.46e-16	0.667937	0.597653
UBE2A	3.57e-20	-0.1052	0.065	0.103	9.96e-16	0.501944	0.429026
IL13RA1	3.59e-20	-0.05982	0.064	0.102	1e-15	0.477415	0.43595
SMAD7	3.73e-20	-0.06573	0.093	0.139	1.04e-15	0.682996	0.637433
ANXA11	3.9e-20	-0.05704	0.114	0.164	1.09e-15	0.782668	0.743129
ZC3HAV1	4.17e-20	-0.03553	0.084	0.128	1.17e-15	0.594872	0.570245
FBLN5	4.47e-20	-0.13546	0.069	0.107	1.25e-15	0.53659	0.442698
FAR1	4.61e-20	-0.05111	0.169	0.234	1.29e-15	0.976176	0.940747
CASC4	4.81e-20	-0.08633	0.116	0.167	1.34e-15	0.743616	0.683778
SOX4	4.91e-20	0.029284	0.182	0.247	1.37e-15	1.31242	1.33272
TNRC6B	5.01e-20	-0.05694	0.273	0.357	1.4e-15	1.45568	1.41622
MRVI1	5.24e-20	-0.10166	0.112	0.161	1.46e-15	0.844305	0.773837
CRY1	6.4e-20	-0.05177	0.062	0.1	1.79e-15	0.482773	0.446892
LRRFIP1	6.6e-20	-0.13131	0.33	0.417	1.84e-15	1.84004	1.74902
LSG1	6.76e-20	-0.10801	0.08	0.121	1.89e-15	0.63484	0.559972
GABPB2	6.86e-20	-0.08485	0.11	0.159	1.92e-15	0.786171	0.727358
KDM5A	6.99e-20	-0.07147	0.174	0.238	1.95e-15	1.04673	0.997198
DDX42	7.16e-20	-0.06465	0.187	0.254	2e-15	1.11341	1.0686
CSGALNACT2	7.44e-20	-0.07114	0.118	0.169	2.08e-15	0.763619	0.714311
MARCKS	7.47e-20	-0.06437	0.136	0.191	2.09e-15	0.873318	0.828703
GPNMB	8.14e-20	-0.12511	0.098	0.143	2.27e-15	0.696064	0.609342
RPS28	8.52e-20	-0.04939	0.231	0.307	2.38e-15	1.33229	1.29805
PHF20	8.56e-20	-0.0525	0.143	0.2	2.39e-15	0.941228	0.904836
SON	8.58e-20	0.25615	0.674	0.699	2.4e-15	2.39916	2.57671
PLXDC1	8.8e-20	-0.13714	0.087	0.129	2.46e-15	0.714102	0.619043
PLD1	8.84e-20	-0.07469	0.067	0.105	2.47e-15	0.515644	0.463877
AMOTL2	8.99e-20	-0.06471	0.067	0.105	2.51e-15	0.559564	0.514713
ID2	9.31e-20	-0.139	0.069	0.107	2.6e-15	0.612147	0.515798
GALNT2	9.33e-20	-0.11024	0.071	0.109	2.61e-15	0.595035	0.518626
MYL12B	9.39e-20	-0.08818	0.065	0.103	2.62e-15	0.470524	0.4094
LMO4	9.54e-20	-0.06719	0.158	0.217	2.66e-15	1.01406	0.967488
ALDH3A2	9.57e-20	-0.12457	0.092	0.136	2.67e-15	0.723413	0.637064
ZNF655	1.02e-19	-0.03759	0.202	0.273	2.86e-15	1.11731	1.09125
PABPC4	1.02e-19	-0.08621	0.254	0.331	2.86e-15	1.45597	1.39621
SVIL	1.08e-19	0.578685	0.305	0.27	3.01e-15	1.2717	1.67281
FAS	1.14e-19	-0.06567	0.07	0.108	3.2e-15	0.515944	0.470427
PDS5A	1.24e-19	-0.06187	0.125	0.178	3.45e-15	0.804655	0.761768
BRWD1	1.39e-19	-0.05791	0.178	0.243	3.9e-15	1.05864	1.0185
HSD17B12	1.5e-19	-0.0679	0.063	0.1	4.2e-15	0.476652	0.42959
ZNF148	1.65e-19	-0.03366	0.121	0.174	4.62e-15	0.768975	0.745643
NFIC	1.66e-19	-0.03252	0.231	0.306	4.63e-15	1.24125	1.21872
SRSF6	1.72e-19	-0.07594	0.169	0.23	4.81e-15	0.998161	0.945521
RO60	1.84e-19	-0.01694	0.118	0.17	5.15e-15	0.713218	0.701477
UTRN	2.05e-19	-0.04009	0.338	0.435	5.72e-15	1.68375	1.65596
CRK	2.11e-19	-0.07369	0.077	0.117	5.88e-15	0.565045	0.513969
MAML2	2.3e-19	-0.08656	0.173	0.234	6.41e-15	1.08118	1.02119
BAIAP2	2.3e-19	-0.06808	0.082	0.123	6.42e-15	0.706801	0.659611
BAG2	2.55e-19	-0.03966	0.067	0.105	7.13e-15	0.493575	0.466081
CDC42BPB	2.58e-19	-0.05888	0.172	0.234	7.2e-15	1.06637	1.02556
CNOT6L	2.81e-19	-0.04487	0.069	0.107	7.86e-15	0.497039	0.46594
PDCD7	2.85e-19	-0.02873	0.134	0.189	7.97e-15	0.848623	0.82871
ZMYM2	2.9e-19	-0.03236	0.255	0.338	8.09e-15	1.31036	1.28793
TOR1AIP2	2.95e-19	-0.04991	0.108	0.157	8.24e-15	0.684104	0.649509
WDR82	2.99e-19	-0.06021	0.112	0.161	8.36e-15	0.722991	0.681254
ADAM10	3.1e-19	-0.06617	0.128	0.181	8.67e-15	0.810651	0.764786
HDGFL3	3.15e-19	-0.04335	0.093	0.137	8.8e-15	0.648639	0.618589
CDC42	3.4e-19	-0.04497	0.161	0.222	9.5e-15	0.929535	0.898364
ENTPD4	3.49e-19	-0.04627	0.159	0.219	9.76e-15	0.985864	0.953794
KDELR1	3.67e-19	-0.07076	0.069	0.107	1.02e-14	0.501738	0.452691
TOP1	3.73e-19	-0.0386	0.191	0.257	1.04e-14	1.15185	1.1251
ATXN7L3B	3.76e-19	-0.0851	0.065	0.102	1.05e-14	0.481203	0.422213
PCNX1	3.77e-19	-0.02208	0.158	0.219	1.05e-14	0.94666	0.931354
COL14A1	3.98e-19	-0.10282	0.203	0.268	1.11e-14	1.26303	1.19176
PTBP1	4.35e-19	-0.06211	0.151	0.209	1.22e-14	0.926542	0.883491
LYST	4.48e-19	-0.04782	0.148	0.206	1.25e-14	0.945321	0.912178
STK38	4.54e-19	-0.09706	0.075	0.114	1.27e-14	0.580381	0.513106
ARHGAP5	5.3e-19	-0.06336	0.176	0.239	1.48e-14	1.05108	1.00716
RPS2	5.36e-19	-0.05791	0.193	0.26	1.5e-14	1.10685	1.06672
ZNF117	5.37e-19	-0.00986	0.113	0.162	1.5e-14	0.734934	0.728097
AAK1	5.38e-19	-0.09005	0.267	0.348	1.5e-14	1.41432	1.3519
KCNQ1OT1	5.46e-19	-0.09967	0.534	0.621	1.53e-14	2.85556	2.78647
MIR22HG	5.74e-19	-0.04012	0.126	0.178	1.6e-14	0.855286	0.827476
SYNCRIP	6.22e-19	-0.05724	0.166	0.226	1.74e-14	0.995336	0.955661
PAWR	6.61e-19	-0.06443	0.214	0.284	1.85e-14	1.26989	1.22523
FNDC3A	7.38e-19	-0.08771	0.209	0.276	2.06e-14	1.19037	1.12957
SLAIN2	7.7e-19	-0.08669	0.119	0.168	2.15e-14	0.798143	0.738054
PPP3CA	8.4e-19	-0.03053	0.16	0.221	2.35e-14	0.973535	0.952372
TBC1D15	8.48e-19	-0.07146	0.078	0.118	2.37e-14	0.565972	0.516439
GAS1	8.61e-19	-0.22397	0.095	0.137	2.41e-14	0.808593	0.653352
RPL13A	9.63e-19	-0.07229	0.243	0.318	2.69e-14	1.40787	1.35776
DZIP1L	9.68e-19	-0.11431	0.077	0.116	2.71e-14	0.616179	0.536946
EIF1	9.72e-19	-0.03034	0.256	0.338	2.72e-14	1.32388	1.30285
ZNF704	1.02e-18	-0.0349	0.222	0.294	2.85e-14	1.24294	1.21874
MEG8	1.18e-18	-0.05565	0.4	0.488	3.29e-14	2.23669	2.19811
MORF4L1	1.24e-18	-0.00055	0.166	0.229	3.45e-14	0.933517	0.933137
TMEM43	1.28e-18	-0.05116	0.13	0.182	3.57e-14	0.822532	0.787068
CLTC	1.29e-18	-0.04171	0.148	0.205	3.59e-14	0.887406	0.858494
TIMP3	1.3e-18	-0.07797	0.28	0.353	3.62e-14	1.80561	1.75156
NCKAP1	1.32e-18	-0.03689	0.203	0.272	3.68e-14	1.12001	1.09444
PRLR	1.39e-18	0.50639	0.111	0.075	3.88e-14	0.470339	0.821342
TANC1	1.53e-18	-0.09043	0.088	0.129	4.26e-14	0.667663	0.604981
ANK3	1.56e-18	-0.13349	0.105	0.149	4.35e-14	0.834498	0.741972
CSAD	1.58e-18	-0.01303	0.177	0.242	4.43e-14	1.0428	1.03376
PPP2R5C	1.62e-18	-0.05168	0.114	0.163	4.52e-14	0.750962	0.71514
LRRK1	1.65e-18	-0.0999	0.069	0.106	4.62e-14	0.563211	0.493967
EIF5	1.81e-18	-0.01566	0.207	0.277	5.06e-14	1.16474	1.15389
GAS5	1.81e-18	-0.05859	0.112	0.159	5.07e-14	0.715792	0.675183
CAPZA1	1.85e-18	-0.01789	0.085	0.126	5.16e-14	0.548544	0.536143
TRAM1	1.93e-18	-0.06769	0.083	0.124	5.39e-14	0.542642	0.495723
MAVS	1.96e-18	-0.08569	0.167	0.227	5.47e-14	1.05563	0.996234
PPM1B	2.07e-18	-0.091	0.088	0.13	5.79e-14	0.641321	0.578248
ISLR	2.35e-18	-0.05054	0.092	0.135	6.56e-14	0.621883	0.58685
TNFRSF12A	2.45e-18	-0.0735	0.07	0.107	6.86e-14	0.563301	0.512355
YME1L1	2.48e-18	-0.05005	0.157	0.215	6.93e-14	0.941114	0.906423
RPL37A	2.48e-18	-0.00307	0.226	0.301	6.93e-14	1.27421	1.27208
RAB2A	2.61e-18	-0.01001	0.081	0.121	7.3e-14	0.52329	0.516352
EIF1AX	2.62e-18	-0.06308	0.172	0.233	7.33e-14	1.01989	0.97616
TNKS	2.63e-18	-0.04614	0.087	0.129	7.35e-14	0.580227	0.548249
TCF4	2.69e-18	-0.10512	0.364	0.448	7.5e-14	1.85209	1.77923
ZYX	2.69e-18	-0.04183	0.092	0.135	7.5e-14	0.651122	0.622129
TOMM20	2.8e-18	-0.03544	0.083	0.124	7.81e-14	0.530926	0.506359
ZFHX3	2.88e-18	-0.07157	0.127	0.178	8.04e-14	0.901944	0.852334
GNB1	2.9e-18	-0.04696	0.129	0.181	8.09e-14	0.778915	0.746363
AEBP2	3.42e-18	-0.06748	0.086	0.128	9.55e-14	0.607933	0.561157
ZBTB4	3.5e-18	-0.03664	0.095	0.139	9.78e-14	0.643192	0.617798
IQGAP1	3.65e-18	-0.03917	0.28	0.363	1.02e-13	1.45306	1.42591
TET2	3.86e-18	0.004668	0.163	0.224	1.08e-13	0.961053	0.964289
TRPS1	4.05e-18	-0.01539	0.121	0.171	1.13e-13	0.77737	0.766704
RNF115	4.29e-18	-0.00246	0.158	0.218	1.2e-13	0.970936	0.969232
CFL1	5.21e-18	-0.09327	0.077	0.116	1.46e-13	0.550867	0.486219
CEMIP2	5.3e-18	-0.03492	0.1	0.144	1.48e-13	0.732997	0.708795
PDIA3	5.44e-18	-0.0551	0.108	0.154	1.52e-13	0.698384	0.660192
LUC7L2	5.61e-18	-0.05225	0.189	0.252	1.57e-13	1.09355	1.05734
CHD3	6.33e-18	-0.08761	0.182	0.244	1.77e-13	1.168	1.10727
ZNF791	6.7e-18	-0.05162	0.141	0.194	1.87e-13	0.880907	0.845127
PTPN12	7.08e-18	-0.05446	0.153	0.21	1.98e-13	0.972644	0.934895
PPM1A	7.13e-18	-0.09088	0.079	0.118	1.99e-13	0.55632	0.49333
AGAP1	7.46e-18	-0.04433	0.066	0.102	2.08e-13	0.518145	0.487421
ZBTB44	7.81e-18	-0.0608	0.089	0.13	2.18e-13	0.598138	0.555997
ZHX3	8.04e-18	-0.08286	0.081	0.121	2.25e-13	0.630763	0.573328
IER3	8.36e-18	-0.04283	0.091	0.133	2.34e-13	0.753785	0.724097
SEC16A	9.02e-18	-0.08184	0.076	0.113	2.52e-13	0.601997	0.545271
39142	9.31e-18	-0.0446	0.142	0.196	2.6e-13	0.827784	0.796871
UACA	9.34e-18	-0.03029	0.279	0.359	2.61e-13	1.56572	1.54472
GOPC	9.57e-18	-0.05187	0.089	0.13	2.67e-13	0.591304	0.555349
ATP6V0C	9.63e-18	-0.09516	0.07	0.106	2.69e-13	0.527519	0.461561
TUG1	1.03e-17	-0.00413	0.225	0.299	2.89e-13	1.16843	1.16557
PSMA3-AS1	1.04e-17	-0.06247	0.311	0.399	2.89e-13	1.51328	1.46998
PRKCI	1.08e-17	-0.03728	0.074	0.113	3.01e-13	0.52942	0.503581
RPL21	1.08e-17	-0.04146	0.194	0.259	3.03e-13	1.15625	1.12751
SEC63	1.21e-17	-0.03868	0.144	0.198	3.37e-13	0.87463	0.847819
PDZD8	1.26e-17	-0.04249	0.075	0.113	3.52e-13	0.524841	0.495386
NPTN	1.32e-17	-0.06486	0.084	0.123	3.69e-13	0.570836	0.525878
GADD45A	1.36e-17	-0.11577	0.078	0.115	3.79e-13	0.639224	0.558978
DPY19L3	1.38e-17	-0.08466	0.074	0.111	3.85e-13	0.559629	0.500944
RGS12	1.42e-17	-0.18442	0.085	0.124	3.97e-13	0.729911	0.602084
FYTTD1	1.44e-17	-0.03477	0.072	0.11	4.03e-13	0.513183	0.489083
WDFY2	1.51e-17	-0.062	0.084	0.124	4.21e-13	0.631415	0.588439
CHFR	1.52e-17	-0.05155	0.079	0.118	4.24e-13	0.598861	0.563128
LIMA1	1.52e-17	-0.07734	0.361	0.452	4.25e-13	1.8513	1.7977
ITGB1	1.55e-17	-0.05041	0.316	0.403	4.32e-13	1.55492	1.51997
RLIM	1.57e-17	-0.00381	0.076	0.114	4.38e-13	0.510286	0.507642
SAMD8	1.57e-17	-0.04387	0.082	0.121	4.39e-13	0.54101	0.510601
EMILIN1	1.77e-17	-0.03192	0.069	0.105	4.94e-13	0.465044	0.442916
RFX3	1.82e-17	-0.05366	0.077	0.115	5.09e-13	0.547183	0.50999
TAF7	1.83e-17	-0.06561	0.069	0.105	5.1e-13	0.494354	0.448875
PCGF5	1.87e-17	-0.02362	0.074	0.111	5.23e-13	0.508056	0.491682
EIF4G1	1.91e-17	-0.05477	0.143	0.196	5.33e-13	0.948685	0.910718
GAK	1.93e-17	-0.04759	0.126	0.175	5.4e-13	0.850335	0.81735
ANK2	1.95e-17	-0.03508	0.303	0.385	5.44e-13	1.94929	1.92498
ZYG11B	2.02e-17	-0.06021	0.069	0.105	5.64e-13	0.485558	0.443825
KMT2D	2.05e-17	-0.06504	0.071	0.107	5.74e-13	0.550846	0.505766
MXD4	2.2e-17	-0.07254	0.099	0.142	6.14e-13	0.68285	0.632567
UBE4A	2.31e-17	-0.04656	0.093	0.136	6.44e-13	0.639325	0.607055
NOP56	2.33e-17	-0.12969	0.143	0.194	6.52e-13	1.0169	0.927001
ZNF587	2.44e-17	-0.08308	0.096	0.138	6.83e-13	0.704854	0.647271
AC092683.1	2.48e-17	0.003301	0.139	0.194	6.92e-13	0.836412	0.8387
TBC1D2B	2.52e-17	-0.03898	0.122	0.171	7.03e-13	0.765246	0.738224
SNX13	2.69e-17	-0.03919	0.11	0.156	7.52e-13	0.693661	0.666494
PCF11	2.75e-17	-0.02448	0.185	0.248	7.69e-13	1.0662	1.04923
LCOR	2.78e-17	-0.02074	0.115	0.163	7.77e-13	0.739862	0.725485
MT-CO1	2.78e-17	0.328295	0.796	0.815	7.78e-13	3.6202	3.84775
SSR3	2.91e-17	-0.06785	0.101	0.145	8.14e-13	0.657378	0.610345
SSR1	2.94e-17	-0.04495	0.083	0.122	8.21e-13	0.562313	0.531154
FAM3C	3.35e-17	-0.06982	0.073	0.11	9.36e-13	0.49164	0.443247
STXBP1	3.45e-17	-0.06405	0.086	0.126	9.63e-13	0.625302	0.580904
FBXO7	3.86e-17	-0.04289	0.087	0.128	1.08e-12	0.598631	0.5689
MED15	4.21e-17	-0.03318	0.068	0.104	1.18e-12	0.516601	0.493602
RBM33	4.21e-17	-0.00589	0.175	0.235	1.18e-12	1.01174	1.00766
YY1	4.25e-17	-0.06055	0.164	0.22	1.19e-12	1.00028	0.958307
LEPROT	4.25e-17	-0.03361	0.108	0.153	1.19e-12	0.642397	0.619098
PLEKHM2	4.34e-17	-0.06966	0.091	0.132	1.21e-12	0.675339	0.627056
ZNF141	4.54e-17	-0.139	0.14	0.19	1.27e-12	0.938592	0.842245
PRKD3	4.63e-17	-0.03637	0.108	0.154	1.29e-12	0.703916	0.678709
PHLDB2	4.81e-17	-0.19949	0.204	0.264	1.34e-12	1.48212	1.34385
ETS1	5e-17	-0.043	0.147	0.2	1.4e-12	0.961861	0.932056
ACTN4	5.04e-17	-0.13777	0.198	0.257	1.41e-12	1.24075	1.14525
ATP6AP2	5.05e-17	-0.07862	0.067	0.102	1.41e-12	0.47027	0.415773
RALGAPB	5.08e-17	-0.03404	0.072	0.108	1.42e-12	0.508646	0.485051
CUL4B	5.26e-17	-0.07826	0.069	0.104	1.47e-12	0.511023	0.456777
TMED5	5.52e-17	-0.07344	0.079	0.117	1.54e-12	0.562457	0.511555
MMP19	5.55e-17	-0.04689	0.2	0.263	1.55e-12	1.4187	1.3862
HAND2-AS1	5.7e-17	0.403862	0.164	0.125	1.59e-12	0.735335	1.01527
MIR100HG	5.97e-17	-0.10679	0.26	0.33	1.67e-12	1.43556	1.36154
HNRNPAB	6.49e-17	-0.05123	0.144	0.197	1.81e-12	0.92781	0.892297
URB1	6.85e-17	-0.08424	0.086	0.125	1.91e-12	0.623117	0.564728
SFPQ	6.87e-17	-0.09524	0.499	0.602	1.92e-12	2.11769	2.05168
TSHZ2	7.81e-17	-0.06665	0.343	0.428	2.18e-12	1.77475	1.72855
SH3YL1	8.1e-17	-0.06113	0.066	0.101	2.26e-12	0.474444	0.432069
MYH10	8.68e-17	-0.10283	0.116	0.161	2.43e-12	0.846296	0.775021
STT3B	8.74e-17	-0.05675	0.112	0.158	2.44e-12	0.723996	0.684659
CLASP2	9.03e-17	-0.01664	0.103	0.147	2.52e-12	0.671303	0.659766
HIPK1	9.48e-17	-0.03497	0.092	0.133	2.65e-12	0.632647	0.608407
RACK1	9.49e-17	-0.0417	0.161	0.217	2.65e-12	0.931914	0.903012
PALLD	9.81e-17	-0.11424	0.34	0.418	2.74e-12	1.76767	1.68848
SEC31A	9.91e-17	-0.0281	0.28	0.361	2.77e-12	1.38557	1.36609
CFI	1.01e-16	-0.07688	0.08	0.118	2.82e-12	0.579448	0.526159
ILF3	1.09e-16	-0.05786	0.266	0.343	3.04e-12	1.42363	1.38353
ANXA2	1.11e-16	-0.08624	0.187	0.247	3.1e-12	1.17418	1.11441
DMTF1	1.12e-16	-0.01561	0.197	0.262	3.12e-12	1.10182	1.09099
ENSA	1.2e-16	0.007136	0.111	0.157	3.36e-12	0.698222	0.703168
DAZAP1	1.24e-16	-0.02185	0.116	0.163	3.48e-12	0.758602	0.743458
PRRC2A	1.29e-16	-0.0174	0.094	0.136	3.61e-12	0.634779	0.62272
CHD2	1.29e-16	-0.04562	0.303	0.386	3.61e-12	1.52562	1.49399
ANAPC5	1.35e-16	-0.02419	0.209	0.276	3.77e-12	1.15388	1.13711
EIF3E	1.36e-16	-0.05114	0.071	0.107	3.8e-12	0.505337	0.469888
SLC35A3	1.37e-16	-0.06086	0.102	0.145	3.82e-12	0.694925	0.652737
GNPTAB	1.39e-16	-0.03393	0.072	0.108	3.9e-12	0.540354	0.516832
SMARCA1	1.43e-16	-0.02236	0.15	0.203	3.99e-12	0.944058	0.928558
VCP	1.47e-16	-0.04626	0.116	0.162	4.11e-12	0.748875	0.716812
JAK2	1.66e-16	-0.08866	0.091	0.131	4.64e-12	0.667051	0.605595
ABCA1	1.7e-16	-0.04519	0.1	0.143	4.76e-12	0.697359	0.666034
FNIP1	1.72e-16	0.038044	0.128	0.18	4.81e-12	0.747447	0.773816
ZC3H7B	1.73e-16	-0.0409	0.075	0.111	4.83e-12	0.536324	0.507973
SNHG16	1.77e-16	-0.08422	0.066	0.1	4.96e-12	0.493008	0.434628
PPFIA1	1.83e-16	-0.02402	0.151	0.205	5.11e-12	0.950839	0.934192
SOCS3	2.11e-16	0.001664	0.159	0.216	5.9e-12	1.01947	1.02062
PPP2R5E	2.23e-16	-0.08047	0.074	0.11	6.24e-12	0.531119	0.475344
IRF3	2.44e-16	-0.0384	0.126	0.174	6.8e-12	0.832841	0.806221
KLF7	2.6e-16	-0.07644	0.104	0.147	7.27e-12	0.739372	0.686385
CAMSAP2	2.61e-16	-0.04947	0.136	0.186	7.3e-12	0.852035	0.817742
ABCC5	2.62e-16	-0.01461	0.098	0.14	7.31e-12	0.638977	0.628848
SMAD2	2.77e-16	-0.03731	0.14	0.19	7.73e-12	0.870292	0.844428
KATNBL1	2.86e-16	-0.04132	0.162	0.217	7.99e-12	0.935337	0.906696
FKBP11	3.01e-16	-0.04807	0.077	0.113	8.4e-12	0.558309	0.524986
ERCC6L2	3.03e-16	-0.02821	0.155	0.209	8.46e-12	0.936809	0.917254
TUBB6	3.06e-16	-0.04697	0.087	0.125	8.55e-12	0.623921	0.591364
LRRFIP2	3.26e-16	-0.09274	0.107	0.15	9.11e-12	0.753988	0.689704
ZNF506	3.37e-16	-0.01972	0.111	0.156	9.42e-12	0.697111	0.683442
SCAMP1	3.5e-16	-0.06171	0.066	0.1	9.79e-12	0.471753	0.428975
PLEKHH2	3.52e-16	0.552348	0.4	0.395	9.83e-12	1.62368	2.00654
UBE2H	3.55e-16	-0.01502	0.123	0.171	9.91e-12	0.733605	0.723193
MRTFA	3.55e-16	-0.09081	0.07	0.105	9.92e-12	0.549647	0.486701
SMARCA4	3.61e-16	-0.06272	0.14	0.189	1.01e-11	0.902291	0.858814
DLG1	3.91e-16	-0.04505	0.125	0.173	1.09e-11	0.798617	0.767392
HNRNPK	3.96e-16	-0.05462	0.187	0.248	1.11e-11	1.04323	1.00537
PKNOX1	4.01e-16	-0.03907	0.066	0.1	1.12e-11	0.505157	0.478074
EEF1G	4.23e-16	-0.04781	0.095	0.136	1.18e-11	0.622389	0.589252
KDM5C	4.25e-16	-0.0401	0.1	0.142	1.19e-11	0.676941	0.649145
CUL4A	4.64e-16	-0.0857	0.068	0.102	1.3e-11	0.531704	0.472298
MYSM1	4.77e-16	-0.01303	0.193	0.256	1.33e-11	1.07137	1.06235
PIAS2	5.59e-16	-0.03653	0.116	0.162	1.56e-11	0.741774	0.716454
FBXL20	5.68e-16	-0.03599	0.069	0.103	1.59e-11	0.491348	0.466405
MLXIP	6.03e-16	-0.02587	0.234	0.303	1.68e-11	1.29445	1.27652
CPXM1	6.21e-16	-0.14658	0.077	0.111	1.74e-11	0.602485	0.500886
DNAJC3	6.64e-16	-0.01078	0.073	0.109	1.86e-11	0.489496	0.482024
TGM2	6.99e-16	0.667608	0.153	0.119	1.95e-11	0.752625	1.21538
WWC3	7.05e-16	-0.03722	0.072	0.107	1.97e-11	0.524756	0.498957
RPS15	7.08e-16	0.005236	0.145	0.197	1.98e-11	0.892299	0.895929
ANO6	7.18e-16	-0.04205	0.112	0.156	2.01e-11	0.729429	0.700281
SRGAP1	7.21e-16	-0.04677	0.165	0.219	2.01e-11	1.07438	1.04196
CST3	7.24e-16	-0.02644	0.128	0.177	2.02e-11	0.803313	0.784988
PRPF38B	7.89e-16	-0.11614	0.221	0.284	2.21e-11	1.31449	1.23399
CXCL12	8.35e-16	-0.0837	0.114	0.157	2.33e-11	0.795648	0.737633
HELZ	8.73e-16	-0.00677	0.153	0.207	2.44e-11	0.886381	0.881691
SPATS2L	8.73e-16	-0.06411	0.152	0.203	2.44e-11	0.939469	0.895028
KPNB1	8.8e-16	-0.07999	0.143	0.192	2.46e-11	0.905386	0.849939
RASSF8-AS1	9e-16	-0.04494	0.136	0.186	2.52e-11	0.898911	0.86776
USP14	9.15e-16	0.003182	0.113	0.158	2.56e-11	0.719113	0.721319
TFRC	9.17e-16	-0.09855	0.079	0.115	2.56e-11	0.634183	0.565877
MAP4K3	1.01e-15	-0.06577	0.099	0.14	2.81e-11	0.700165	0.654576
TRIM56	1.05e-15	-0.07084	0.257	0.327	2.93e-11	1.39955	1.35044
UBE2E2	1.14e-15	-0.00957	0.076	0.112	3.18e-11	0.519693	0.51306
H3F3B	1.15e-15	-0.01045	0.279	0.359	3.22e-11	1.40143	1.39418
MCC	1.18e-15	0.001055	0.144	0.195	3.3e-11	0.89719	0.897921
SLC7A2	1.22e-15	-0.14262	0.075	0.109	3.41e-11	0.685687	0.586827
PARVA	1.25e-15	0.01063	0.183	0.243	3.48e-11	1.02471	1.03208
RAP1B	1.26e-15	-0.0416	0.195	0.255	3.53e-11	1.09858	1.06975
SPTAN1	1.29e-15	-0.04141	0.231	0.297	3.61e-11	1.31879	1.29008
RAPH1	1.3e-15	-0.03193	0.075	0.111	3.62e-11	0.538604	0.51647
RASSF8	1.38e-15	-0.00208	0.107	0.15	3.84e-11	0.683743	0.682301
EEF1D	1.55e-15	-0.03646	0.177	0.235	4.34e-11	1.02858	1.00331
HERC4	1.57e-15	-0.01051	0.194	0.256	4.38e-11	1.05572	1.04843
TTC28	1.6e-15	-0.0165	0.095	0.135	4.47e-11	0.618131	0.606695
ASAP2	1.69e-15	-0.03818	0.115	0.159	4.71e-11	0.781493	0.755027
CASC15	1.7e-15	-0.00747	0.152	0.204	4.75e-11	0.943557	0.938376
ZCCHC24	1.73e-15	-0.04706	0.108	0.15	4.83e-11	0.703083	0.670466
ZDHHC3	1.73e-15	-0.05172	0.069	0.102	4.84e-11	0.509808	0.473961
WDR60	1.73e-15	-0.04764	0.254	0.325	4.85e-11	1.39906	1.36604
ZNF451	1.74e-15	-0.02851	0.219	0.285	4.86e-11	1.17324	1.15348
DYNC1LI2	1.8e-15	0.006777	0.209	0.275	5.03e-11	1.13803	1.14273
MDM2	1.88e-15	-0.0263	0.109	0.152	5.26e-11	0.703418	0.685188
TUBB	1.89e-15	-0.04758	0.086	0.123	5.29e-11	0.557565	0.524584
PIP5K1A	2.02e-15	-0.06124	0.072	0.106	5.65e-11	0.530005	0.487555
PCBP2	2.03e-15	-0.04966	0.215	0.279	5.67e-11	1.1529	1.11848
KLF10	2.11e-15	-0.04391	0.073	0.108	5.9e-11	0.535356	0.504918
CHM	2.21e-15	0.0022	0.084	0.122	6.18e-11	0.538851	0.540376
N4BP2	2.25e-15	-0.00079	0.099	0.14	6.3e-11	0.667309	0.666759
NONO	2.33e-15	-0.03117	0.109	0.152	6.5e-11	0.712523	0.69092
MYC	2.44e-15	-0.06571	0.079	0.114	6.81e-11	0.611352	0.565803
SPPL2A	2.5e-15	-0.0057	0.116	0.161	6.99e-11	0.68632	0.682367
PFN1	2.63e-15	-0.05876	0.069	0.102	7.34e-11	0.500262	0.45953
CEP170	2.63e-15	-0.02911	0.118	0.163	7.36e-11	0.767082	0.746905
ARPC5	2.73e-15	-0.0049	0.115	0.159	7.64e-11	0.720303	0.71691
ZNF891	2.74e-15	-0.0437	0.077	0.112	7.66e-11	0.574027	0.543739
RPS19	2.83e-15	0.018041	0.17	0.228	7.89e-11	1.00048	1.01298
SYNGAP1	2.83e-15	-0.04946	0.073	0.107	7.91e-11	0.537807	0.503523
LRP6	2.93e-15	-0.03089	0.124	0.17	8.19e-11	0.768072	0.746659
DNAJC10	3.04e-15	-0.05215	0.137	0.185	8.5e-11	0.874643	0.838494
RAB14	3.14e-15	-0.01134	0.093	0.132	8.78e-11	0.576606	0.568748
POM121	3.3e-15	-0.03616	0.08	0.116	9.22e-11	0.568057	0.542991
LUZP1	3.41e-15	-0.08145	0.089	0.126	9.52e-11	0.660627	0.604173
YLPM1	3.57e-15	-0.04353	0.11	0.153	9.96e-11	0.75301	0.722837
MBNL2	3.58e-15	0.002267	0.183	0.242	1e-10	1.01035	1.01193
TMEM59	3.59e-15	-0.0441	0.07	0.103	1e-10	0.459119	0.428551
DNAJB14	3.61e-15	0.005291	0.151	0.203	1.01e-10	0.846012	0.849679
RABEP1	3.63e-15	-0.07837	0.122	0.166	1.01e-10	0.823388	0.769063
USP9X	3.63e-15	-0.00277	0.129	0.177	1.01e-10	0.767891	0.765972
CAPN2	3.65e-15	-0.0598	0.18	0.236	1.02e-10	1.08865	1.0472
SEL1L	3.81e-15	-0.03886	0.089	0.127	1.07e-10	0.59459	0.567657
MRTFB	3.96e-15	0.002419	0.081	0.117	1.11e-10	0.535599	0.537276
ACTR3	4.2e-15	-0.01374	0.125	0.171	1.17e-10	0.76788	0.758355
DDI2	4.3e-15	-0.02165	0.073	0.108	1.2e-10	0.525004	0.509995
APPBP2	4.4e-15	-0.03396	0.076	0.111	1.23e-10	0.520605	0.497066
ARFGAP3	4.58e-15	-0.03025	0.143	0.192	1.28e-10	0.878438	0.85747
FAM114A1	4.6e-15	-0.02192	0.093	0.132	1.29e-10	0.61192	0.596729
DCP2	4.7e-15	0.026145	0.1	0.141	1.31e-10	0.627678	0.6458
SMAD3	4.82e-15	-0.0792	0.084	0.12	1.35e-10	0.600239	0.545346
RPL27	4.87e-15	-0.05852	0.075	0.11	1.36e-10	0.514972	0.47441
RPL18	5.26e-15	0.033525	0.148	0.201	1.47e-10	0.867212	0.89045
PCBP1-AS1	5.28e-15	-0.04737	0.104	0.145	1.48e-10	0.680923	0.648089
GATAD1	5.3e-15	-0.02871	0.236	0.306	1.48e-10	1.26588	1.24598
RPS10	5.32e-15	-0.0357	0.067	0.1	1.49e-10	0.460953	0.436207
SUCO	5.43e-15	-0.05338	0.078	0.114	1.52e-10	0.547174	0.510171
HIPK3	5.5e-15	0.019038	0.195	0.259	1.54e-10	1.06031	1.0735
POLR2A	5.8e-15	-0.03059	0.073	0.108	1.62e-10	0.511205	0.49
CPD	5.84e-15	-0.00436	0.08	0.116	1.63e-10	0.542135	0.539112
TMEM168	6.25e-15	-0.04612	0.092	0.13	1.75e-10	0.612598	0.580632
WLS	6.32e-15	-0.05416	0.085	0.122	1.77e-10	0.625757	0.588215
FAM126A	6.41e-15	-0.04003	0.119	0.163	1.79e-10	0.80791	0.780163
EIF3A	6.54e-15	-0.03523	0.223	0.288	1.83e-10	1.2568	1.23238
TTL	6.57e-15	-0.05154	0.074	0.108	1.83e-10	0.542375	0.506653
PPP1R12C	6.57e-15	-0.08174	0.108	0.149	1.84e-10	0.793304	0.736648
IPO9	6.58e-15	0.012417	0.101	0.142	1.84e-10	0.650624	0.65923
CREBBP	6.62e-15	0.002678	0.165	0.221	1.85e-10	0.954973	0.956829
OTULIN	6.74e-15	-0.0681	0.124	0.169	1.88e-10	0.83829	0.791085
HNRNPH3	6.8e-15	-0.01444	0.227	0.295	1.9e-10	1.20267	1.19267
NISCH	7.28e-15	-0.03388	0.15	0.201	2.03e-10	0.920534	0.897048
AC004889.1	7.29e-15	-0.01732	0.073	0.107	2.04e-10	0.507667	0.495662
WAC	7.32e-15	-0.01402	0.199	0.261	2.05e-10	1.06937	1.05965
TMX3	7.47e-15	-0.04545	0.076	0.11	2.09e-10	0.531283	0.499781
MICU3	7.76e-15	-0.04632	0.119	0.163	2.17e-10	0.766044	0.733939
RPSA	7.96e-15	-0.06029	0.123	0.168	2.22e-10	0.764794	0.723007
RPS6	8.13e-15	-0.01191	0.194	0.254	2.27e-10	1.17662	1.16836
LINC00472	8.32e-15	-0.06444	0.115	0.157	2.33e-10	0.850927	0.806261
PREX2	8.58e-15	0.019214	0.087	0.125	2.4e-10	0.650604	0.663922
ZNF652	8.96e-15	-0.0643	0.069	0.102	2.5e-10	0.483776	0.439206
PGR	8.96e-15	-0.17271	0.186	0.236	2.5e-10	1.37215	1.25243
UBE3C	9.13e-15	-0.06552	0.091	0.128	2.55e-10	0.630496	0.585083
CGGBP1	9.38e-15	-0.01873	0.091	0.13	2.62e-10	0.571598	0.558614
HEG1	9.52e-15	-0.03782	0.09	0.128	2.66e-10	0.665829	0.639618
FRMD4A	9.64e-15	-0.15202	0.071	0.103	2.69e-10	0.638884	0.533512
CD81	9.66e-15	0.007009	0.162	0.216	2.7e-10	0.902567	0.907426
RPS11	9.71e-15	-0.02973	0.135	0.182	2.71e-10	0.841332	0.820724
PCMTD2	9.87e-15	-0.07821	0.076	0.11	2.76e-10	0.562309	0.508096
IST1	9.88e-15	-0.02915	0.133	0.181	2.76e-10	0.839313	0.819106
KDM3A	1e-14	-0.09611	0.09	0.127	2.8e-10	0.692605	0.625985
PHC3	1.04e-14	0.000244	0.153	0.205	2.89e-10	0.869243	0.869412
LINC01184	1.09e-14	-0.0321	0.068	0.101	3.04e-10	0.490212	0.467963
RAB6A	1.1e-14	-0.04117	0.09	0.127	3.07e-10	0.575742	0.547208
YBX1	1.16e-14	-0.04832	0.097	0.136	3.24e-10	0.661566	0.628073
SET	1.17e-14	-0.02754	0.11	0.152	3.27e-10	0.708117	0.689029
CCDC18-AS1	1.18e-14	-0.00441	0.14	0.189	3.28e-10	0.827028	0.823971
MYO1C	1.38e-14	-0.01951	0.107	0.149	3.85e-10	0.72761	0.714088
TANK	1.44e-14	-0.04767	0.07	0.102	4.02e-10	0.492656	0.459613
RPL5	1.45e-14	0.032488	0.217	0.284	4.05e-10	1.16069	1.18321
EBLN3P	1.45e-14	-0.03114	0.078	0.113	4.06e-10	0.54113	0.519543
EP300	1.51e-14	-0.01282	0.156	0.208	4.22e-10	0.914188	0.905301
UBA6	1.58e-14	-0.05615	0.148	0.196	4.42e-10	0.901429	0.862508
PLXDC2	1.66e-14	-0.06175	0.223	0.284	4.63e-10	1.32018	1.27738
TMF1	1.73e-14	0.011076	0.184	0.242	4.84e-10	0.998183	1.00586
RNF145	1.75e-14	-0.07097	0.171	0.225	4.9e-10	1.03811	0.988922
OGT	1.78e-14	-0.03817	0.28	0.355	4.97e-10	1.40239	1.37594
ACIN1	1.82e-14	-0.00885	0.22	0.286	5.07e-10	1.19748	1.19135
SPG7	1.87e-14	-0.02689	0.23	0.296	5.22e-10	1.24624	1.2276
PTTG1IP	1.87e-14	-0.05761	0.12	0.164	5.22e-10	0.763766	0.723834
ST3GAL1	1.9e-14	-0.06378	0.09	0.126	5.31e-10	0.663854	0.619642
TERF2IP	1.91e-14	-0.00204	0.076	0.111	5.34e-10	0.510417	0.509001
ITPRID2	1.95e-14	-0.00612	0.092	0.13	5.45e-10	0.619755	0.615509
AKAP11	2.01e-14	-0.0217	0.103	0.143	5.62e-10	0.643249	0.628204
RPS12	2.13e-14	0.024155	0.174	0.23	5.96e-10	1.06435	1.08109
UBR5	2.13e-14	-0.0383	0.224	0.289	5.96e-10	1.22915	1.2026
TRAPPC12	2.2e-14	-0.03894	0.075	0.108	6.15e-10	0.533753	0.506761
SETX	2.21e-14	-0.02962	0.238	0.305	6.16e-10	1.28208	1.26155
CBX6	2.38e-14	-0.02394	0.082	0.117	6.65e-10	0.537137	0.520541
NSD3	2.43e-14	0.030957	0.235	0.305	6.79e-10	1.20625	1.22771
DYRK1A	2.56e-14	-0.00978	0.124	0.169	7.14e-10	0.769548	0.762766
MAGI2	2.69e-14	-0.00465	0.081	0.116	7.53e-10	0.532967	0.529745
DCTN4	2.71e-14	-0.04001	0.069	0.101	7.58e-10	0.496559	0.468829
EIF4A2	2.74e-14	-0.04404	0.277	0.35	7.65e-10	1.37376	1.34323
OSBPL9	2.91e-14	-0.00569	0.162	0.215	8.12e-10	0.953673	0.94973
RUFY3	3.1e-14	-0.04061	0.369	0.461	8.66e-10	1.72924	1.70109
PTMS	3.14e-14	-0.05303	0.115	0.157	8.78e-10	0.747449	0.710689
SERBP1	3.19e-14	0.012423	0.2	0.26	8.9e-10	1.09773	1.10634
TNKS2	3.19e-14	-0.02272	0.101	0.141	8.91e-10	0.658349	0.642597
IARS	3.44e-14	-0.05515	0.106	0.146	9.62e-10	0.72973	0.691504
KIF13B	3.66e-14	-0.06094	0.092	0.129	1.02e-09	0.703099	0.660856
RAF1	3.82e-14	-0.0129	0.151	0.202	1.07e-09	0.924861	0.915919
SLC8A1	3.86e-14	0.394211	0.117	0.086	1.08e-09	0.476379	0.749625
HBP1	3.88e-14	-0.04601	0.087	0.123	1.09e-09	0.562701	0.530812
SRP14	3.94e-14	-0.02123	0.074	0.108	1.1e-09	0.473374	0.458655
WDFY3	4.11e-14	0.010744	0.135	0.181	1.15e-09	0.795707	0.803154
RER1	4.12e-14	-0.05485	0.081	0.116	1.15e-09	0.569703	0.531683
RNF149	4.19e-14	-0.00893	0.174	0.228	1.17e-09	1.03244	1.02625
SLC25A3	4.3e-14	-0.0362	0.113	0.155	1.2e-09	0.71077	0.68568
PAN3	4.32e-14	-0.07438	0.077	0.11	1.21e-09	0.557008	0.505449
PAPOLA	4.38e-14	0.016304	0.268	0.344	1.22e-09	1.30447	1.31577
ARHGAP29	4.73e-14	-0.04097	0.07	0.102	1.32e-09	0.590403	0.562007
NR2F2-AS1	5.1e-14	-0.008	0.153	0.203	1.42e-09	0.931726	0.926183
NDUFS2	5.19e-14	0.006632	0.082	0.117	1.45e-09	0.578092	0.582689
BTG1	5.19e-14	0.019528	0.201	0.261	1.45e-09	1.13447	1.148
RPL26	5.34e-14	-0.0331	0.151	0.199	1.49e-09	0.949558	0.926618
CDC42BPA	5.37e-14	-0.00369	0.189	0.247	1.5e-09	1.04176	1.0392
RNF168	5.39e-14	-0.02504	0.076	0.11	1.51e-09	0.5567	0.539344
ITPR2	5.56e-14	-0.06526	0.215	0.275	1.55e-09	1.25276	1.20752
RPL22	5.6e-14	0.03934	0.17	0.225	1.56e-09	0.978029	1.0053
ADPGK	5.62e-14	-0.00491	0.073	0.106	1.57e-09	0.494313	0.490912
FGFR1OP2	5.67e-14	-0.01178	0.164	0.217	1.58e-09	0.936054	0.927886
GAS7	5.67e-14	-0.05448	0.116	0.158	1.59e-09	0.812056	0.774294
AC245060.5	6.35e-14	-0.17645	0.124	0.164	1.77e-09	1.03882	0.916516
RPL36	6.36e-14	-0.01895	0.166	0.218	1.78e-09	1.02348	1.01034
TMA16	6.4e-14	-0.07367	0.079	0.113	1.79e-09	0.593142	0.542078
INTS3	6.78e-14	-0.02483	0.138	0.185	1.89e-09	0.866313	0.849099
FGFR1	6.81e-14	-0.00357	0.308	0.384	1.9e-09	1.65415	1.65167
ASAP1	7.05e-14	-0.01654	0.116	0.158	1.97e-09	0.750193	0.73873
TCERG1	7.29e-14	-0.05705	0.203	0.262	2.04e-09	1.17068	1.13113
LINC00963	7.49e-14	-0.04526	0.091	0.128	2.09e-09	0.647988	0.616613
MAP1LC3A	7.86e-14	-0.02909	0.101	0.139	2.2e-09	0.698962	0.6788
PPIA	7.93e-14	-0.03648	0.099	0.137	2.21e-09	0.640047	0.614761
EXOC7	7.94e-14	-0.0144	0.149	0.197	2.22e-09	0.907927	0.897947
NACA	8.54e-14	-0.00952	0.153	0.204	2.39e-09	0.902668	0.896069
SCARB2	8.6e-14	0.010235	0.187	0.244	2.4e-09	1.04436	1.05145
ALPK1	8.73e-14	-0.02819	0.07	0.102	2.44e-09	0.503213	0.483675
TASOR2	8.93e-14	-0.0274	0.164	0.216	2.5e-09	0.993562	0.974571
FBXO11	8.97e-14	0.001298	0.112	0.154	2.51e-09	0.698711	0.69961
RUNX1T1	9.85e-14	-0.02206	0.15	0.198	2.75e-09	0.950237	0.934946
SETBP1	1.02e-13	0.003847	0.135	0.181	2.84e-09	0.828586	0.831252
TMCO3	1.03e-13	-0.03283	0.103	0.142	2.88e-09	0.678518	0.655759
UBE2V1	1.05e-13	-0.0122	0.099	0.138	2.92e-09	0.617355	0.608896
CCDC82	1.05e-13	0.006135	0.135	0.181	2.93e-09	0.814421	0.818673
TCEA1	1.06e-13	-0.05619	0.132	0.177	2.96e-09	0.842419	0.803471
RPS7	1.07e-13	0.023377	0.178	0.234	2.99e-09	0.987592	1.0038
MATN2	1.12e-13	-0.11728	0.081	0.114	3.12e-09	0.696937	0.615642
RPS5	1.12e-13	-0.06783	0.083	0.117	3.13e-09	0.565177	0.518161
BBX	1.15e-13	0.030177	0.115	0.157	3.22e-09	0.736752	0.75767
RBBP7	1.2e-13	-0.03084	0.128	0.171	3.35e-09	0.801572	0.780193
BNIP2	1.2e-13	-0.03655	0.07	0.101	3.35e-09	0.467098	0.441765
AUTS2	1.21e-13	-0.02243	0.213	0.274	3.38e-09	1.17793	1.16238
MBNL1	1.22e-13	-0.04012	0.371	0.459	3.41e-09	1.75614	1.72833
RPL24	1.24e-13	0.026282	0.149	0.198	3.46e-09	0.876507	0.894725
ZFP91	1.4e-13	-0.04251	0.074	0.106	3.91e-09	0.523481	0.494016
SRRM2	1.46e-13	0.153296	0.773	0.809	4.07e-09	2.79783	2.90408
KLC1	1.48e-13	-0.0038	0.248	0.316	4.14e-09	1.27371	1.27108
AC145124.1	1.49e-13	-0.00102	0.091	0.127	4.16e-09	0.611024	0.61032
PDPR	1.52e-13	-0.05129	0.084	0.118	4.24e-09	0.61151	0.575961
DDR2	1.55e-13	0.024103	0.181	0.237	4.33e-09	1.06496	1.08166
KHDRBS1	1.62e-13	-0.00074	0.129	0.173	4.52e-09	0.755383	0.754869
DCP1A	1.62e-13	-0.02463	0.076	0.109	4.53e-09	0.521057	0.503981
KAT6A	1.63e-13	0.03322	0.185	0.243	4.54e-09	1.0185	1.04152
PPIB	1.66e-13	0.012875	0.08	0.114	4.65e-09	0.487196	0.49612
CBX3	1.75e-13	0.00593	0.114	0.156	4.9e-09	0.706474	0.710584
LRP1	1.85e-13	-0.02651	0.297	0.373	5.16e-09	1.48776	1.46939
NRIP1	1.86e-13	0.008136	0.154	0.203	5.2e-09	0.911323	0.916962
MESD	1.93e-13	0.002226	0.111	0.152	5.4e-09	0.724247	0.72579
MYOF	1.97e-13	-0.02805	0.244	0.309	5.51e-09	1.37337	1.35393
APPL2	1.97e-13	-0.09426	0.07	0.101	5.52e-09	0.53907	0.473732
ATP11B	2.05e-13	-0.03452	0.079	0.112	5.73e-09	0.527538	0.503613
PIK3C3	2.16e-13	-0.03027	0.088	0.124	6.03e-09	0.598618	0.577637
SLC25A37	2.22e-13	-0.05832	0.337	0.417	6.21e-09	1.68574	1.64532
ATP1A1	2.25e-13	0.025056	0.148	0.197	6.3e-09	0.969193	0.986561
C1RL	2.4e-13	-0.01302	0.085	0.12	6.7e-09	0.580782	0.57176
CSNK2A1	2.74e-13	-0.00613	0.178	0.231	7.66e-09	1.01748	1.01324
ETV6	2.79e-13	0.008599	0.092	0.128	7.79e-09	0.617538	0.623499
YAF2	2.79e-13	-0.059	0.075	0.107	7.81e-09	0.53061	0.489711
H2AFY	2.85e-13	0.0006	0.212	0.273	7.95e-09	1.15307	1.15348
WASF2	2.91e-13	0.012873	0.143	0.191	8.12e-09	0.830847	0.83977
RPL9	2.93e-13	0.045429	0.182	0.238	8.19e-09	1.02956	1.06105
ZBTB43	3.01e-13	-0.03826	0.073	0.105	8.4e-09	0.527115	0.500599
NAP1L1	3.13e-13	-0.01895	0.3	0.378	8.74e-09	1.48926	1.47613
NOM1	3.2e-13	-0.08954	0.114	0.154	8.94e-09	0.825239	0.763172
NOC2L	3.29e-13	-0.01542	0.105	0.143	9.2e-09	0.699066	0.688378
KIF5B	3.83e-13	-0.04238	0.163	0.213	1.07e-08	0.97032	0.940943
WWC2	3.9e-13	-0.01931	0.092	0.128	1.09e-08	0.624152	0.610767
HECTD1	3.94e-13	-0.00998	0.21	0.27	1.1e-08	1.13599	1.12908
RPS14	4.03e-13	0.063619	0.182	0.239	1.13e-08	1.0407	1.0848
DSE	4.11e-13	-0.03091	0.147	0.193	1.15e-08	0.96926	0.947838
SETD5	4.25e-13	-0.00394	0.265	0.335	1.19e-08	1.35012	1.34739
IPO7	4.33e-13	-0.0164	0.124	0.167	1.21e-08	0.773868	0.762503
MAP4K4	4.35e-13	-0.04845	0.201	0.256	1.21e-08	1.17317	1.13959
PIKFYVE	4.52e-13	0.007241	0.086	0.12	1.26e-08	0.55307	0.55809
POU2F1	4.69e-13	-0.00769	0.097	0.134	1.31e-08	0.662313	0.656985
MTUS1	4.86e-13	-0.03796	0.122	0.164	1.36e-08	0.842763	0.816453
SS18	4.9e-13	-0.03856	0.086	0.12	1.37e-08	0.578904	0.552173
WDR27	4.92e-13	-0.00498	0.087	0.123	1.38e-08	0.580632	0.577182
PDE5A	4.95e-13	-0.01998	0.072	0.104	1.38e-08	0.522515	0.508666
FYN	5.06e-13	-0.03711	0.146	0.191	1.41e-08	0.921271	0.895546
ARHGAP26	5.16e-13	-0.04997	0.079	0.112	1.44e-08	0.646961	0.612321
KIF1B	5.23e-13	-0.00767	0.201	0.258	1.46e-08	1.1548	1.14948
CAND1	5.41e-13	-0.017	0.17	0.222	1.51e-08	0.956055	0.944274
OAT	5.59e-13	-0.02122	0.076	0.108	1.56e-08	0.508638	0.493933
MAP3K7	5.66e-13	-0.02435	0.089	0.124	1.58e-08	0.601821	0.584946
SMURF2	5.72e-13	-0.00696	0.109	0.148	1.6e-08	0.700703	0.695878
RBM3	6.01e-13	-0.03743	0.172	0.222	1.68e-08	0.985163	0.959221
SPARCL1	6.09e-13	-0.20167	0.462	0.531	1.7e-08	2.31786	2.17807
CSNK1G3	6.23e-13	-0.02453	0.09	0.125	1.74e-08	0.600079	0.583073
EVI5	6.47e-13	-0.0284	0.09	0.125	1.81e-08	0.628788	0.6091
TP53BP1	6.51e-13	-0.04569	0.187	0.24	1.82e-08	1.09489	1.06322
ZFC3H1	6.55e-13	-0.02229	0.286	0.359	1.83e-08	1.42867	1.41321
POM121C	6.73e-13	-0.0308	0.075	0.106	1.88e-08	0.523414	0.502064
DDX60L	7.03e-13	-0.09205	0.073	0.103	1.97e-08	0.581599	0.517792
CALR	7.35e-13	-0.05414	0.071	0.101	2.05e-08	0.494462	0.456937
APTX	7.41e-13	-0.03188	0.071	0.102	2.07e-08	0.518719	0.496619
IP6K2	7.59e-13	-0.04574	0.095	0.131	2.12e-08	0.624383	0.592678
CORO1C	7.64e-13	-0.05505	0.111	0.149	2.13e-08	0.764164	0.726009
TOR1AIP1	7.89e-13	-0.03355	0.078	0.11	2.2e-08	0.531838	0.508583
EP400	7.96e-13	-0.03563	0.116	0.157	2.22e-08	0.761808	0.737114
SRSF2	8.31e-13	-0.02759	0.213	0.271	2.32e-08	1.15914	1.14001
ABI1	8.34e-13	-0.04815	0.088	0.122	2.33e-08	0.602114	0.568736
ARHGEF12	8.44e-13	0.024572	0.203	0.262	2.36e-08	1.09268	1.10972
CLDND1	8.53e-13	-0.01637	0.09	0.125	2.38e-08	0.569518	0.558173
GOSR2	8.66e-13	-0.03994	0.085	0.119	2.42e-08	0.585597	0.557912
PLEKHA1	8.88e-13	-0.01408	0.169	0.219	2.48e-08	0.996262	0.986499
MDM4	9.04e-13	-0.02169	0.332	0.413	2.52e-08	1.56699	1.55196
ATF2	9.29e-13	0.018078	0.078	0.11	2.6e-08	0.49563	0.50816
ATG2B	9.53e-13	0.002602	0.098	0.135	2.66e-08	0.636096	0.6379
ARNT	9.9e-13	-0.02495	0.071	0.102	2.77e-08	0.506516	0.489218
PLAGL1	9.9e-13	-0.02606	0.279	0.349	2.77e-08	1.48636	1.4683
MAPK8IP3	9.96e-13	-0.04279	0.09	0.124	2.78e-08	0.649686	0.620023
WIPF2	1.03e-12	-0.02441	0.077	0.109	2.88e-08	0.532147	0.515228
SSBP4	1.07e-12	-0.08783	0.072	0.102	2.98e-08	0.535961	0.475084
VPS53	1.07e-12	-0.03184	0.097	0.133	3e-08	0.669836	0.647769
CPSF6	1.17e-12	0.010679	0.147	0.195	3.27e-08	0.82155	0.828952
CREBRF	1.17e-12	0.001016	0.166	0.216	3.27e-08	0.971249	0.971953
TGFBR3	1.18e-12	-0.05237	0.093	0.128	3.29e-08	0.66092	0.624618
NAGK	1.24e-12	-0.01661	0.087	0.121	3.47e-08	0.596688	0.585175
ZNF706	1.27e-12	-0.00123	0.089	0.124	3.54e-08	0.547651	0.546796
POLR3D	1.29e-12	-0.04059	0.086	0.12	3.6e-08	0.624693	0.596555
YTHDC1	1.38e-12	-0.02756	0.23	0.292	3.86e-08	1.22041	1.20131
COL6A2	1.38e-12	-0.04909	0.47	0.564	3.87e-08	2.08023	2.0462
CD44	1.42e-12	-0.09633	0.279	0.34	3.96e-08	1.68154	1.61477
PDE4D	1.44e-12	0.05258	0.128	0.172	4.01e-08	0.853921	0.890367
C6orf89	1.44e-12	-0.05191	0.078	0.11	4.03e-08	0.544514	0.508534
TM9SF2	1.52e-12	-0.02939	0.071	0.102	4.24e-08	0.464105	0.443734
NEK1	1.53e-12	-0.02323	0.075	0.106	4.27e-08	0.528572	0.512468
DHX36	1.54e-12	-0.00864	0.305	0.381	4.31e-08	1.50069	1.4947
NFE2L2	1.74e-12	0.007523	0.24	0.306	4.85e-08	1.24584	1.25106
B3GALNT2	1.74e-12	-0.01224	0.097	0.133	4.87e-08	0.674277	0.665792
ANKRD26	1.77e-12	0.018848	0.126	0.168	4.94e-08	0.816204	0.829268
EFHC1	1.77e-12	-0.01635	0.085	0.119	4.95e-08	0.569466	0.558133
PPP1R12B	1.78e-12	0.068432	0.246	0.311	4.96e-08	1.42125	1.46868
DCAF10	1.84e-12	0.014088	0.087	0.122	5.13e-08	0.561063	0.570828
NFATC1	1.86e-12	0.028942	0.115	0.154	5.19e-08	0.895352	0.915413
LPIN2	1.91e-12	-0.02115	0.085	0.118	5.35e-08	0.576428	0.56177
LAMB1	1.92e-12	-0.04379	0.295	0.364	5.35e-08	1.65168	1.62132
DCBLD2	1.92e-12	-0.02684	0.088	0.122	5.38e-08	0.570507	0.551905
UBA52	2.15e-12	-0.06013	0.108	0.145	6e-08	0.703203	0.661522
SPIDR	2.17e-12	-0.02072	0.091	0.126	6.05e-08	0.604718	0.590353
EEA1	2.26e-12	0.02766	0.162	0.212	6.32e-08	0.939022	0.958194
TLN2	2.29e-12	-0.04947	0.08	0.112	6.39e-08	0.587469	0.553179
TOPORS	2.35e-12	-0.01637	0.081	0.113	6.56e-08	0.568694	0.557349
PCID2	2.4e-12	-0.00632	0.074	0.105	6.72e-08	0.493215	0.488831
MSRB3	2.43e-12	-0.00664	0.098	0.134	6.8e-08	0.65866	0.654057
RPS9	2.5e-12	0.006343	0.12	0.16	7e-08	0.726453	0.73085
EIF2AK2	2.52e-12	0.016895	0.113	0.152	7.03e-08	0.695211	0.706922
LENG8	2.66e-12	-0.00791	0.257	0.324	7.43e-08	1.35639	1.3509
MIR99AHG	2.87e-12	-0.04104	0.472	0.555	8.02e-08	2.2135	2.18505
ZFP36	2.89e-12	0.062536	0.316	0.394	8.09e-08	1.70848	1.75182
ZNF609	2.99e-12	-0.01233	0.111	0.15	8.35e-08	0.713199	0.70465
MED28	3.07e-12	-0.01213	0.107	0.145	8.57e-08	0.661065	0.65266
CNOT2	3.21e-12	0.01118	0.151	0.198	8.96e-08	0.875996	0.883745
MED17	3.33e-12	-0.01779	0.1	0.136	9.31e-08	0.650874	0.638541
MTCH1	3.46e-12	-0.00612	0.171	0.221	9.68e-08	0.992529	0.988287
RAB3GAP2	3.53e-12	-0.00103	0.14	0.184	9.85e-08	0.845526	0.844815
ARID1A	3.6e-12	3.55e-05	0.135	0.177	1.01e-07	0.82521	0.825235
ERBIN	3.63e-12	0.001958	0.135	0.178	1.01e-07	0.794608	0.795965
NR3C1	3.67e-12	0.011323	0.134	0.177	1.03e-07	0.822458	0.830307
IRS2	3.67e-12	-0.00167	0.098	0.134	1.03e-07	0.620469	0.61931
PRDM2	3.68e-12	0.037425	0.216	0.276	1.03e-07	1.16777	1.19371
SPATS2	3.76e-12	-0.0463	0.086	0.119	1.05e-07	0.604591	0.572501
GFPT2	3.81e-12	0.022801	0.16	0.207	1.06e-07	1.08569	1.10149
CALM1	3.86e-12	0.015537	0.164	0.213	1.08e-07	0.971861	0.982631
SLC12A2	4.03e-12	-0.02055	0.086	0.119	1.13e-07	0.625139	0.610895
AC037198.1	4.07e-12	0.059624	0.17	0.22	1.14e-07	1.26861	1.30994
DLGAP4	4.11e-12	-0.05365	0.088	0.121	1.15e-07	0.614816	0.577627
RPL10A	4.14e-12	0.029342	0.157	0.205	1.16e-07	0.886291	0.906629
DNASE1	4.17e-12	-0.02942	0.072	0.101	1.16e-07	0.525868	0.505478
RPS4X	4.2e-12	0.023889	0.148	0.194	1.17e-07	0.914968	0.931527
MYO9A	4.21e-12	-0.00156	0.22	0.28	1.18e-07	1.17413	1.17305
HDGF	4.3e-12	-0.05551	0.084	0.116	1.2e-07	0.608508	0.570035
PTPN2	4.38e-12	-0.00191	0.116	0.155	1.22e-07	0.750934	0.749613
TTC39B	4.49e-12	-0.00794	0.084	0.117	1.25e-07	0.577125	0.571624
RSPRY1	4.5e-12	-0.02903	0.075	0.106	1.26e-07	0.521744	0.501621
PTK7	4.55e-12	0.001172	0.072	0.102	1.27e-07	0.459853	0.460665
MAGI2-AS3	4.56e-12	-0.01323	0.26	0.326	1.27e-07	1.35899	1.34983
NFKB1	4.61e-12	0.006323	0.101	0.138	1.29e-07	0.709897	0.714279
RPS20	4.62e-12	-0.03316	0.139	0.182	1.29e-07	0.856508	0.833524
DNMT3A	4.67e-12	-0.03158	0.076	0.107	1.31e-07	0.541755	0.519864
DDX10	4.76e-12	-0.04469	0.1	0.136	1.33e-07	0.70566	0.674684
RPL14	4.95e-12	0.038875	0.163	0.212	1.38e-07	0.92215	0.949097
CFAP97	5.01e-12	0.012479	0.095	0.131	1.4e-07	0.621562	0.630212
BHLHE40	5.12e-12	0.003608	0.1	0.135	1.43e-07	0.697073	0.699573
SBNO1	5.2e-12	0.017338	0.1	0.137	1.45e-07	0.643576	0.655594
QSER1	5.4e-12	0.033438	0.089	0.123	1.51e-07	0.572595	0.595773
ZFP36L1	5.43e-12	-0.00967	0.459	0.543	1.52e-07	2.22553	2.21882
TJP1	5.61e-12	0.016383	0.125	0.167	1.57e-07	0.759795	0.771151
CNBP	5.76e-12	-0.03319	0.095	0.129	1.61e-07	0.608076	0.585067
SUPT6H	5.79e-12	-0.09012	0.105	0.141	1.62e-07	0.757792	0.695328
PDCD11	5.96e-12	-0.06197	0.075	0.105	1.67e-07	0.575147	0.532193
ZZEF1	5.98e-12	-0.02538	0.104	0.14	1.67e-07	0.688303	0.67071
RHOA	6.26e-12	-0.05676	0.077	0.107	1.75e-07	0.517666	0.47832
CTNND1	6.31e-12	-0.02654	0.16	0.206	1.76e-07	0.942021	0.923625
SMC5	6.38e-12	-0.00346	0.28	0.35	1.78e-07	1.41665	1.41425
AC068587.4	6.62e-12	0.00969	0.084	0.117	1.85e-07	0.580247	0.586964
INO80D	6.79e-12	0.021829	0.148	0.194	1.9e-07	0.843435	0.858565
MXRA7	6.82e-12	0.009535	0.099	0.135	1.9e-07	0.599788	0.606397
TRIM44	6.98e-12	0.009668	0.19	0.243	1.95e-07	1.05559	1.06229
TAF1	7.01e-12	-0.00689	0.107	0.144	1.96e-07	0.710003	0.705225
NSD2	7.07e-12	-0.02448	0.072	0.102	1.98e-07	0.536821	0.519853
CCDC80	7.1e-12	-0.02242	0.385	0.458	1.98e-07	2.24472	2.22918
PPIL4	7.12e-12	-0.02097	0.077	0.108	1.99e-07	0.536266	0.521728
PRPF40A	7.53e-12	0.057265	0.159	0.209	2.1e-07	0.901577	0.94127
RIF1	7.79e-12	0.015284	0.29	0.364	2.18e-07	1.45483	1.46543
RNF169	7.85e-12	0.008458	0.12	0.16	2.19e-07	0.731974	0.737837
GNB5	7.93e-12	-0.00222	0.078	0.109	2.21e-07	0.528559	0.527021
G3BP1	7.96e-12	0.002757	0.177	0.227	2.22e-07	0.988696	0.990607
MRPS25	8.53e-12	0.004596	0.091	0.125	2.38e-07	0.584099	0.587285
CEP85L	9.54e-12	-0.01768	0.083	0.115	2.67e-07	0.568596	0.556342
APP	9.75e-12	0.00532	0.185	0.238	2.72e-07	0.988922	0.99261
RPL18A	1.05e-11	0.006459	0.142	0.185	2.93e-07	0.862512	0.86699
ESR1	1.07e-11	-0.04276	0.187	0.235	2.98e-07	1.13054	1.1009
PUM2	1.08e-11	-0.01741	0.118	0.157	3.01e-07	0.728624	0.716555
RALGPS2	1.1e-11	-0.05619	0.103	0.138	3.06e-07	0.763257	0.724312
MPZL1	1.11e-11	0.015352	0.104	0.141	3.11e-07	0.650473	0.661115
AGFG1	1.13e-11	0.023871	0.119	0.159	3.14e-07	0.711776	0.728321
ZEB1	1.16e-11	0.013221	0.215	0.273	3.24e-07	1.17002	1.17919
TXNIP	1.16e-11	0.438947	0.273	0.248	3.24e-07	1.2302	1.53446
CTTN	1.27e-11	-0.0118	0.204	0.259	3.55e-07	1.12542	1.11724
PLCB1	1.31e-11	0.367645	0.1	0.073	3.65e-07	0.474835	0.729667
CAPZB	1.31e-11	0.023668	0.144	0.188	3.66e-07	0.831516	0.847922
PHF20L1	1.38e-11	0.020761	0.259	0.325	3.86e-07	1.32806	1.34245
RPL19	1.41e-11	0.032082	0.14	0.184	3.94e-07	0.845767	0.868005
FOXO1	1.44e-11	0.079031	0.197	0.252	4.03e-07	1.10366	1.15844
SOCS2	1.47e-11	-0.02674	0.107	0.143	4.09e-07	0.691659	0.673125
PCED1A	1.48e-11	-0.09927	0.077	0.106	4.13e-07	0.589353	0.520547
KPNA6	1.53e-11	-0.00224	0.101	0.136	4.27e-07	0.647215	0.645664
SNHG5	1.57e-11	0.00976	0.159	0.206	4.4e-07	0.943297	0.950062
STAT6	1.59e-11	-0.02235	0.126	0.166	4.44e-07	0.798884	0.78339
KLHL24	1.6e-11	0.022715	0.124	0.164	4.46e-07	0.713011	0.728755
RPL27A	1.6e-11	0.017273	0.143	0.186	4.48e-07	0.846367	0.85834
SULF2	1.62e-11	-0.01105	0.13	0.17	4.51e-07	0.80688	0.799222
RPL4	1.67e-11	0.027025	0.115	0.154	4.65e-07	0.706165	0.724897
MARK3	1.74e-11	-0.01601	0.247	0.31	4.87e-07	1.253	1.24189
GNL3L	1.77e-11	-0.04349	0.087	0.119	4.96e-07	0.615455	0.58531
PSD3	1.88e-11	-0.02471	0.123	0.161	5.24e-07	0.787223	0.770093
MATR3.1	1.9e-11	0.028256	0.101	0.137	5.31e-07	0.591971	0.611556
MIA3	1.98e-11	0.029016	0.127	0.167	5.52e-07	0.783387	0.8035
TTLL3	1.98e-11	0.022437	0.193	0.247	5.54e-07	1.06918	1.08473
CLOCK	2.07e-11	0.024153	0.083	0.115	5.78e-07	0.53371	0.550452
THOC2	2.14e-11	-0.00373	0.25	0.313	5.97e-07	1.30847	1.30588
TFG	2.14e-11	-0.02286	0.088	0.12	5.97e-07	0.564468	0.548623
NUP98	2.17e-11	-0.00374	0.103	0.139	6.05e-07	0.661349	0.658753
CREB1	2.18e-11	-0.00767	0.102	0.138	6.09e-07	0.645564	0.64025
HDAC8	2.28e-11	-0.01479	0.126	0.165	6.38e-07	0.757979	0.747725
C1S	2.3e-11	-0.01421	0.328	0.405	6.43e-07	1.59383	1.58398
ADAR	2.3e-11	0.039047	0.174	0.225	6.43e-07	0.955257	0.982323
MIRLET7BHG	2.49e-11	-0.07216	0.131	0.17	6.96e-07	0.931008	0.880988
ARHGEF2	2.56e-11	-0.05327	0.087	0.119	7.14e-07	0.640032	0.603105
BMP1	2.64e-11	-0.02943	0.089	0.121	7.37e-07	0.62566	0.605263
LNPEP	2.67e-11	0.006758	0.121	0.16	7.47e-07	0.715828	0.720512
ZC3H13	2.67e-11	-0.04435	0.156	0.2	7.47e-07	1.009	0.978264
ARHGAP17	2.7e-11	-0.02595	0.082	0.112	7.53e-07	0.574846	0.556858
USO1	2.71e-11	-0.0203	0.093	0.126	7.56e-07	0.612764	0.598692
PCOLCE	2.86e-11	-0.05049	0.09	0.122	7.99e-07	0.617062	0.582064
TNRC6C	2.93e-11	0.022377	0.122	0.161	8.18e-07	0.76348	0.77899
BTBD7	2.96e-11	0.009224	0.131	0.173	8.28e-07	0.781181	0.787575
ZADH2	2.99e-11	-0.02836	0.072	0.1	8.35e-07	0.49491	0.47525
NDUFS1	3.02e-11	0.023377	0.12	0.159	8.45e-07	0.719089	0.735293
EEF1A1	3.1e-11	0.01952	0.398	0.487	8.66e-07	1.94772	1.96125
PRKCA	3.13e-11	-0.00119	0.155	0.199	8.76e-07	0.910928	0.9101
RPS8	3.15e-11	0.094466	0.267	0.336	8.79e-07	1.43075	1.49623
VEZF1	3.17e-11	0.005565	0.083	0.114	8.86e-07	0.523304	0.527161
CDYL	3.18e-11	-0.02624	0.079	0.109	8.89e-07	0.559536	0.541344
CBLB	3.25e-11	0.024364	0.268	0.333	9.07e-07	1.43517	1.45206
GTPBP4	3.26e-11	-0.01245	0.099	0.133	9.12e-07	0.704887	0.696254
PSME4	3.33e-11	-0.02816	0.173	0.221	9.31e-07	1.02243	1.00291
PRRC2B	3.39e-11	0.030648	0.247	0.311	9.48e-07	1.25257	1.27381
EHMT1	3.47e-11	-0.02841	0.137	0.178	9.69e-07	0.824498	0.804808
LATS1	3.55e-11	-0.00113	0.094	0.127	9.92e-07	0.589716	0.588935
TERF1	3.56e-11	0.009504	0.086	0.118	9.95e-07	0.557156	0.563744
C1R	3.85e-11	-0.0513	0.277	0.341	1.07e-06	1.45119	1.41563
PDK4	3.89e-11	-0.11592	0.117	0.152	1.09e-06	1.13118	1.05082
TNRC6A	3.91e-11	0.012061	0.332	0.412	1.09e-06	1.57596	1.58432
ZNF483	4.33e-11	-0.00409	0.078	0.108	1.21e-06	0.546552	0.543716
ANKRD11	4.45e-11	-0.04601	0.379	0.46	1.24e-06	1.79331	1.76142
URI1	4.46e-11	0.012605	0.106	0.142	1.24e-06	0.663655	0.672392
WT1	4.5e-11	-0.09007	0.161	0.204	1.26e-06	1.03709	0.974654
DGKD	4.53e-11	0.018897	0.102	0.137	1.27e-06	0.717812	0.73091
GNL3	4.75e-11	-0.02689	0.128	0.167	1.33e-06	0.825466	0.806824
SLC4A7	4.84e-11	-0.05289	0.233	0.29	1.35e-06	1.39427	1.35761
PNPLA8	4.94e-11	0.006048	0.095	0.129	1.38e-06	0.610186	0.614378
ANKRD17	5e-11	-0.01572	0.182	0.23	1.4e-06	1.05753	1.04664
RPL23A	5.13e-11	-0.0366	0.137	0.177	1.43e-06	0.837154	0.811783
DZIP1	5.24e-11	-0.04757	0.082	0.112	1.46e-06	0.573427	0.540454
ATM	5.5e-11	0.032288	0.219	0.277	1.54e-06	1.15108	1.17346
KRR1	5.7e-11	0.01836	0.098	0.132	1.59e-06	0.631693	0.644419
WNK1	5.72e-11	0.041499	0.143	0.187	1.6e-06	0.832609	0.861374
GTF2I	5.74e-11	-0.01788	0.338	0.417	1.61e-06	1.57065	1.55825
HTRA1	6.13e-11	-0.04122	0.073	0.101	1.71e-06	0.488938	0.460369
ZNF26	6.14e-11	-0.01489	0.076	0.105	1.72e-06	0.555393	0.545071
SPRY1	6.19e-11	0.021329	0.125	0.164	1.73e-06	0.871909	0.886693
COG5	6.38e-11	-0.01269	0.085	0.116	1.78e-06	0.539917	0.531121
GPATCH2L	6.38e-11	0.019053	0.215	0.271	1.78e-06	1.13963	1.15283
PCSK7	6.52e-11	0.013833	0.268	0.333	1.82e-06	1.41199	1.42158
MPDZ	6.62e-11	0.034751	0.137	0.179	1.85e-06	0.82302	0.847107
ECE1	6.79e-11	0.006546	0.117	0.154	1.9e-06	0.750913	0.755451
PPP4R3A	7e-11	0.032683	0.149	0.193	1.96e-06	0.867648	0.890302
TCEAL4	7.02e-11	-0.03196	0.169	0.214	1.96e-06	1.07693	1.05478
NFATC2IP	7.12e-11	-0.01231	0.153	0.196	1.99e-06	0.946374	0.937843
ZNHIT6	7.21e-11	-0.02828	0.102	0.136	2.01e-06	0.685442	0.665841
RNF19A	7.3e-11	0.050243	0.27	0.338	2.04e-06	1.35875	1.39358
DDB1	7.4e-11	-0.04196	0.099	0.132	2.07e-06	0.672592	0.643505
ALDH1A3	8.08e-11	-0.08262	0.073	0.1	2.26e-06	0.67496	0.617691
FN1	8.45e-11	-0.00935	0.316	0.382	2.36e-06	1.9379	1.93142
ELP2	8.53e-11	0.032818	0.131	0.172	2.38e-06	0.75434	0.777087
RBM4	8.61e-11	0.03174	0.122	0.16	2.41e-06	0.700383	0.722383
NEXN	8.98e-11	0.486248	0.193	0.166	2.51e-06	0.994744	1.33178
PTPN11	9.19e-11	0.01106	0.082	0.112	2.57e-06	0.538681	0.546347
CYFIP1	9.2e-11	-0.04957	0.09	0.121	2.57e-06	0.626516	0.592155
ZNF562	9.84e-11	0.004298	0.097	0.13	2.75e-06	0.620338	0.623317
RPS17	9.93e-11	-0.01029	0.09	0.121	2.77e-06	0.564118	0.556987
KHSRP	9.99e-11	-0.04937	0.085	0.115	2.79e-06	0.588029	0.553808
SYTL4	1.01e-10	0.009093	0.154	0.198	2.81e-06	0.938419	0.944722
RPL7A	1.1e-10	0.065431	0.161	0.208	3.06e-06	0.91742	0.962774
HTT	1.1e-10	-0.00722	0.098	0.131	3.09e-06	0.654726	0.649724
RSL1D1	1.11e-10	-0.06415	0.076	0.104	3.1e-06	0.572655	0.528187
CEP290	1.12e-10	0.00975	0.15	0.193	3.12e-06	0.934658	0.941416
FAM126B	1.12e-10	0.012241	0.109	0.145	3.14e-06	0.694331	0.702816
CALCOCO2	1.13e-10	-0.01422	0.115	0.151	3.15e-06	0.746742	0.736884
KMT5B	1.19e-10	-0.01105	0.116	0.153	3.33e-06	0.732265	0.724608
IL6ST	1.21e-10	0.028018	0.296	0.366	3.38e-06	1.43762	1.45705
ELF2	1.22e-10	0.038738	0.16	0.206	3.4e-06	0.907622	0.934473
SPAG9	1.22e-10	-0.02202	0.41	0.5	3.41e-06	1.85312	1.83785
MFSD14C	1.23e-10	0.025919	0.161	0.206	3.44e-06	0.91514	0.933106
SEMA4A	1.34e-10	0.082753	0.085	0.115	3.74e-06	0.78517	0.84253
SAT1	1.38e-10	-0.13386	0.635	0.693	3.86e-06	2.91916	2.82638
MDK	1.42e-10	0.005423	0.079	0.109	3.95e-06	0.507335	0.511094
METTL7A	1.44e-10	-0.07764	0.078	0.107	4.01e-06	0.591388	0.537572
RABL2B	1.53e-10	-0.00245	0.084	0.114	4.28e-06	0.550807	0.549106
PEBP1	1.61e-10	0.005484	0.094	0.126	4.49e-06	0.579766	0.583568
SF3B2	1.64e-10	-0.02659	0.112	0.147	4.58e-06	0.735656	0.717227
MIER1	1.66e-10	-0.01328	0.114	0.15	4.63e-06	0.71816	0.708956
GSPT1	1.67e-10	0.035568	0.102	0.136	4.67e-06	0.657722	0.682376
KIAA1217	1.69e-10	-0.08822	0.083	0.112	4.73e-06	0.652095	0.590948
PCNP	1.71e-10	-0.00899	0.083	0.113	4.78e-06	0.525238	0.519005
MGA	1.73e-10	0.031067	0.121	0.159	4.84e-06	0.752024	0.773558
GAPVD1	1.75e-10	0.016964	0.086	0.117	4.88e-06	0.556043	0.567802
ZNF800	1.77e-10	-0.00222	0.102	0.137	4.95e-06	0.646057	0.644521
STMP1	1.8e-10	0.039718	0.076	0.105	5.04e-06	0.469483	0.497013
FBXO42	1.81e-10	-0.03608	0.081	0.109	5.06e-06	0.574306	0.549297
PPP2R2A	1.93e-10	0.003019	0.13	0.169	5.39e-06	0.800177	0.80227
LTN1	2.02e-10	-0.01136	0.112	0.148	5.65e-06	0.712067	0.70419
ERLEC1	2.03e-10	0.02369	0.08	0.109	5.66e-06	0.510647	0.527068
MECP2	2.12e-10	0.023428	0.155	0.199	5.93e-06	0.883929	0.900168
SH3GLB1	2.13e-10	0.017503	0.147	0.189	5.95e-06	0.86995	0.882082
GLUL	2.15e-10	-0.09806	0.181	0.224	6.02e-06	1.28247	1.2145
ZNF326	2.17e-10	-0.00804	0.124	0.161	6.05e-06	0.772707	0.767132
CCNL2	2.18e-10	-0.04895	0.377	0.457	6.08e-06	1.73943	1.7055
OTUD7B	2.19e-10	-0.02873	0.083	0.113	6.12e-06	0.587682	0.567767
NUTM2A-AS1	2.22e-10	0.058521	0.212	0.269	6.21e-06	1.09415	1.13471
RPS26	2.29e-10	0.021873	0.149	0.192	6.41e-06	0.854483	0.869644
ANKIB1	2.3e-10	0.00626	0.123	0.161	6.42e-06	0.763538	0.767876
UGGT2	2.42e-10	0.022068	0.175	0.223	6.76e-06	0.984986	1.00028
FMNL2	2.44e-10	0.010025	0.072	0.1	6.81e-06	0.50541	0.512359
RPL7L1	2.47e-10	0.003751	0.117	0.153	6.9e-06	0.73611	0.73871
RPLP2	2.63e-10	0.016597	0.166	0.21	7.35e-06	0.994157	1.00566
NCOA3	2.7e-10	0.016705	0.082	0.112	7.55e-06	0.548138	0.559716
GPRASP1	2.73e-10	0.000677	0.105	0.139	7.64e-06	0.676528	0.676997
TPT1-AS1	2.87e-10	0.030815	0.199	0.25	8.03e-06	1.08255	1.10391
RPLP1	2.92e-10	0.049836	0.295	0.363	8.16e-06	1.55238	1.58692
TOP2B	2.95e-10	-0.01379	0.118	0.153	8.25e-06	0.725718	0.716157
STRN3	2.98e-10	0.009089	0.093	0.124	8.34e-06	0.586416	0.592716
RCN2	2.99e-10	0.013479	0.077	0.105	8.36e-06	0.493066	0.502408
RPL23	3.06e-10	-0.00162	0.147	0.188	8.56e-06	0.863609	0.862489
WTAP	3.16e-10	-0.02615	0.147	0.187	8.83e-06	0.909506	0.891378
RPS15A	3.24e-10	0.023393	0.159	0.203	9.06e-06	0.911811	0.928026
MAU2	3.41e-10	0.016366	0.105	0.139	9.53e-06	0.679059	0.690402
TMEM131	3.43e-10	-0.00944	0.125	0.162	9.59e-06	0.764368	0.757823
TENT2	3.5e-10	-0.0405	0.09	0.121	9.77e-06	0.579732	0.551661
TCF12	3.51e-10	0.047995	0.15	0.193	9.79e-06	0.818819	0.852087
UBQLN1	3.53e-10	0.03036	0.086	0.117	9.85e-06	0.545165	0.566209
HSPA12A	3.57e-10	-0.03609	0.076	0.104	9.98e-06	0.533868	0.508852
RPS23	3.59e-10	0.036275	0.17	0.216	1e-05	1.02551	1.05065
RPL34	3.6e-10	0.081844	0.212	0.267	1.01e-05	1.24148	1.29821
FUS	3.65e-10	-0.05562	0.57	0.667	1.02e-05	2.31374	2.27519
CLMN	3.82e-10	-0.04726	0.144	0.183	1.07e-05	0.978238	0.945483
CCDC57	3.85e-10	-0.03629	0.098	0.13	1.08e-05	0.67724	0.652083
TBRG1	3.91e-10	0.013874	0.09	0.121	1.09e-05	0.579609	0.589226
ZFAS1	3.97e-10	-0.01264	0.09	0.12	1.11e-05	0.576061	0.567297
CDK12	4.08e-10	0.021612	0.18	0.228	1.14e-05	1.00171	1.01669
ABCE1	4.1e-10	0.01326	0.114	0.149	1.15e-05	0.71723	0.726421
ACTN1	4.22e-10	0.021514	0.309	0.377	1.18e-05	1.67383	1.68874
MBD4	4.25e-10	-0.02763	0.101	0.133	1.19e-05	0.674409	0.655254
TRIM27	4.36e-10	0.016087	0.081	0.11	1.22e-05	0.541741	0.552892
ZDHHC21	4.52e-10	0.052636	0.172	0.22	1.26e-05	0.935521	0.972006
VAMP2	4.55e-10	0.016582	0.121	0.158	1.27e-05	0.7333	0.744794
RBM5	4.63e-10	-0.03377	0.402	0.488	1.29e-05	1.78327	1.75987
MAN2C1	4.65e-10	-0.05727	0.117	0.152	1.3e-05	0.78534	0.745642
OCIAD1	4.74e-10	0.043532	0.093	0.125	1.32e-05	0.544269	0.574444
RPS18	4.88e-10	0.037093	0.173	0.221	1.36e-05	1.01505	1.04076
NHLRC2	5.05e-10	-0.00459	0.084	0.113	1.41e-05	0.525989	0.52281
TRIM22	5.06e-10	-0.00023	0.114	0.148	1.41e-05	0.716832	0.716671
CLU	5.09e-10	-0.02186	0.094	0.125	1.42e-05	0.69073	0.67558
ZNF532	5.22e-10	0.019085	0.112	0.147	1.46e-05	0.683706	0.696935
RPS3A	5.23e-10	0.021735	0.192	0.241	1.46e-05	1.0935	1.10857
RPL6	5.24e-10	0.086738	0.232	0.292	1.46e-05	1.23737	1.29749
PHYKPL	5.41e-10	0.02766	0.152	0.195	1.51e-05	0.851926	0.871099
SPCS2	5.5e-10	0.006766	0.075	0.103	1.54e-05	0.48304	0.487729
CCNL1	5.63e-10	0.00989	0.478	0.571	1.57e-05	2.10013	2.10698
ZMYND11	5.78e-10	0.002671	0.108	0.142	1.61e-05	0.670521	0.672373
FAU	5.81e-10	0.039289	0.116	0.152	1.62e-05	0.696791	0.724024
INTS1	5.82e-10	-0.00625	0.083	0.112	1.63e-05	0.594231	0.589896
TRAPPC10	5.92e-10	-0.01397	0.101	0.133	1.65e-05	0.667708	0.658025
ACAP2	6.24e-10	0.041173	0.118	0.154	1.74e-05	0.69391	0.722449
CCT2	6.39e-10	-0.00733	0.076	0.103	1.78e-05	0.5123	0.50722
FAM160B2	6.39e-10	-0.04045	0.093	0.123	1.79e-05	0.642859	0.614825
C20orf194	6.44e-10	-0.00652	0.086	0.115	1.8e-05	0.579486	0.574965
FMR1	6.56e-10	0.003571	0.075	0.102	1.83e-05	0.508937	0.511412
NAV3	6.75e-10	-0.01797	0.109	0.143	1.89e-05	0.751974	0.739517
MBD5	6.87e-10	0.019553	0.148	0.19	1.92e-05	0.830868	0.844421
LAMA4	7.04e-10	0.026199	0.18	0.227	1.97e-05	1.06514	1.0833
CSDE1	7.33e-10	0.055373	0.148	0.19	2.05e-05	0.802494	0.840875
PHACTR4	7.39e-10	-0.00724	0.153	0.194	2.07e-05	0.930114	0.925099
C1RL-AS1	7.5e-10	-0.01003	0.09	0.12	2.1e-05	0.617714	0.610762
LPGAT1	7.63e-10	0.049534	0.089	0.119	2.13e-05	0.530893	0.565227
KIAA0355	7.78e-10	0.029816	0.125	0.162	2.17e-05	0.739914	0.760581
MSL1	7.82e-10	-0.004	0.13	0.167	2.19e-05	0.786777	0.784004
ATXN3	7.92e-10	0.027439	0.125	0.162	2.21e-05	0.757641	0.776661
ECPAS	8e-10	0.02396	0.162	0.205	2.24e-05	0.950175	0.966784
RPL36A	8.43e-10	0.047053	0.15	0.192	2.36e-05	0.866855	0.89947
FNTA	8.5e-10	-0.02841	0.112	0.146	2.37e-05	0.723989	0.704294
SPEN	8.52e-10	0.032206	0.192	0.242	2.38e-05	1.11065	1.13297
KMT2B	8.9e-10	-0.06222	0.122	0.157	2.49e-05	0.827524	0.784399
ORMDL1	9.39e-10	0.032142	0.132	0.171	2.62e-05	0.754654	0.776933
FBXO32	9.8e-10	0.011799	0.133	0.169	2.74e-05	1.02515	1.03333
MAN1A2	1.02e-09	0.02878	0.094	0.125	2.85e-05	0.581149	0.601098
GIGYF2	1.03e-09	-0.02991	0.12	0.154	2.86e-05	0.787659	0.766926
DDHD1	1.03e-09	0.031715	0.118	0.154	2.87e-05	0.710935	0.732919
PCMTD1	1.08e-09	0.023532	0.168	0.213	3.01e-05	0.901716	0.918027
CARMIL1	1.1e-09	-0.01884	0.101	0.133	3.08e-05	0.711352	0.69829
STAT5B	1.13e-09	0.036984	0.126	0.164	3.17e-05	0.771169	0.796805
AVL9	1.15e-09	0.015522	0.091	0.121	3.2e-05	0.576951	0.58771
ELAVL1	1.15e-09	-0.04018	0.076	0.103	3.2e-05	0.525978	0.498128
UBN1	1.16e-09	0.006804	0.103	0.135	3.24e-05	0.693245	0.697962
LSM8	1.19e-09	-0.00505	0.116	0.149	3.34e-05	0.710449	0.706948
SRP19	1.29e-09	0.058048	0.112	0.147	3.6e-05	0.699856	0.740092
BCL6	1.32e-09	0.069245	0.157	0.2	3.69e-05	0.992464	1.04046
TDG	1.38e-09	0.049317	0.103	0.136	3.85e-05	0.630051	0.664235
SNX5	1.4e-09	7.36e-05	0.099	0.13	3.91e-05	0.633815	0.633866
ERICH1	1.4e-09	0.071087	0.17	0.217	3.91e-05	0.945164	0.994437
SUGT1	1.42e-09	0.008607	0.088	0.118	3.98e-05	0.578144	0.58411
SELENOM	1.44e-09	-0.01061	0.081	0.109	4.03e-05	0.497583	0.490229
RERE	1.44e-09	0.014055	0.271	0.335	4.03e-05	1.36285	1.37259
RTF1	1.59e-09	0.023558	0.158	0.2	4.46e-05	0.948635	0.964964
CAPRIN1	1.6e-09	-0.01272	0.107	0.139	4.47e-05	0.65579	0.646976
RPL31	1.65e-09	0.016789	0.111	0.144	4.61e-05	0.65482	0.666457
DVL3	1.74e-09	0.018044	0.098	0.129	4.85e-05	0.64179	0.654298
NAA25	1.77e-09	-0.02611	0.077	0.104	4.93e-05	0.537636	0.519536
SREK1	1.79e-09	-0.00541	0.328	0.397	5e-05	1.58518	1.58143
HNRNPL	1.79e-09	0.035041	0.145	0.185	5e-05	0.856681	0.880969
TMEM50B	1.86e-09	0.040998	0.089	0.119	5.21e-05	0.57198	0.600398
KDM6A	1.9e-09	-0.01125	0.088	0.117	5.31e-05	0.581687	0.573888
ARFGEF1	1.97e-09	0.031682	0.16	0.203	5.5e-05	0.907982	0.929942
AHCTF1	1.99e-09	-0.01323	0.13	0.166	5.57e-05	0.818494	0.809326
SUDS3	2.1e-09	-0.03078	0.084	0.112	5.87e-05	0.589307	0.567971
CIAO1	2.12e-09	0.026052	0.112	0.145	5.93e-05	0.69052	0.708578
ZNF106	2.15e-09	0.049092	0.197	0.245	6.02e-05	1.14469	1.17872
PEX26	2.22e-09	-0.01391	0.079	0.106	6.2e-05	0.559551	0.54991
HMCN1	2.28e-09	0.133642	0.131	0.17	6.37e-05	0.826086	0.918719
EEF1B2	2.38e-09	-0.04497	0.075	0.101	6.64e-05	0.514424	0.483255
SGSM2	2.45e-09	0.019002	0.074	0.101	6.85e-05	0.513644	0.526815
DIS3	2.49e-09	-0.0012	0.092	0.121	6.95e-05	0.626671	0.625841
PDCD6IP	2.55e-09	0.022861	0.163	0.206	7.12e-05	0.895229	0.911075
PRKDC	2.59e-09	0.037193	0.166	0.209	7.25e-05	0.933179	0.958959
MTR	2.72e-09	0.040788	0.144	0.184	7.61e-05	0.84451	0.872782
CCDC47	2.93e-09	-0.02085	0.076	0.102	8.18e-05	0.522378	0.507926
SRSF4	2.95e-09	0.009826	0.252	0.31	8.25e-05	1.27349	1.2803
THRAP3	2.98e-09	0.038071	0.133	0.17	8.33e-05	0.781231	0.80762
XRN1	3.28e-09	0.055946	0.182	0.229	9.17e-05	0.992759	1.03154
ABCA5	3.28e-09	0.017798	0.098	0.129	9.17e-05	0.651432	0.663769
TUT7	3.58e-09	0.036343	0.128	0.164	9.99e-05	0.77799	0.803181
SMG1	3.71e-09	0.00568	0.376	0.459	0.000104	1.69485	1.69879
HNRNPC	3.86e-09	0.035377	0.218	0.27	0.000108	1.11753	1.14206
USP40	4.04e-09	0.002124	0.103	0.134	0.000113	0.681777	0.683249
ZNF518A	4.09e-09	0.036503	0.14	0.179	0.000114	0.835409	0.860711
ZNF207	4.1e-09	-0.00809	0.441	0.53	0.000114	1.89267	1.88706
ACSL3	4.32e-09	0.035281	0.079	0.106	0.000121	0.506174	0.530629
SVEP1	4.34e-09	-0.00216	0.118	0.152	0.000121	0.816278	0.814781
SLC39A10	4.49e-09	0.047813	0.106	0.138	0.000125	0.629749	0.66289
PRPF38A	4.5e-09	-0.00158	0.075	0.101	0.000126	0.503875	0.502778
FERMT2	4.66e-09	0.009125	0.238	0.293	0.00013	1.29679	1.30312
ABCF1	4.71e-09	-0.02581	0.143	0.181	0.000132	0.959304	0.941412
RPL8	4.85e-09	0.05571	0.168	0.212	0.000135	0.969986	1.0086
RYK	4.92e-09	0.022533	0.095	0.125	0.000137	0.579215	0.594834
RC3H1	4.94e-09	0.071562	0.167	0.212	0.000138	0.912309	0.961912
ABLIM1	4.99e-09	0.058025	0.194	0.24	0.000139	1.15747	1.19769
SMARCA5	5.04e-09	0.040064	0.199	0.249	0.000141	1.07344	1.10121
ODF2L	5.17e-09	0.053265	0.232	0.288	0.000145	1.21514	1.25206
CCNT2	5.28e-09	0.052225	0.142	0.18	0.000147	0.792859	0.829059
ZFX	5.32e-09	-0.002	0.109	0.142	0.000149	0.662187	0.660804
RPS13	5.39e-09	0.065895	0.117	0.151	0.00015	0.693823	0.739498
GLUD1	5.42e-09	0.020315	0.079	0.106	0.000152	0.537462	0.551543
EPM2AIP1	5.43e-09	0.028051	0.123	0.159	0.000152	0.711894	0.731338
PICALM	5.48e-09	0.053959	0.124	0.159	0.000153	0.730741	0.768142
PRSS23	5.68e-09	-0.0138	0.097	0.127	0.000159	0.618776	0.609212
TRIM33	5.75e-09	0.037615	0.146	0.185	0.000161	0.831212	0.857285
SNX1	5.84e-09	-0.0011	0.094	0.123	0.000163	0.599023	0.598262
SCFD1	5.86e-09	0.003525	0.132	0.168	0.000164	0.789037	0.791481
ENY2	5.88e-09	0.021431	0.103	0.135	0.000164	0.615842	0.630697
LTBP3	5.94e-09	0.054254	0.17	0.214	0.000166	0.939416	0.977022
ZNF84	6.19e-09	-0.02189	0.078	0.104	0.000173	0.534665	0.519493
UBAP2	6.19e-09	-0.00855	0.088	0.115	0.000173	0.595894	0.589967
SNHG29	6.22e-09	0.031451	0.08	0.107	0.000174	0.487098	0.508898
ZNF708	6.64e-09	-0.02261	0.082	0.109	0.000186	0.512754	0.497085
SRP72	6.67e-09	0.006687	0.078	0.104	0.000186	0.509533	0.514169
WDR6	6.78e-09	-0.00618	0.108	0.139	0.00019	0.700073	0.695786
TM2D1	6.88e-09	0.02009	0.102	0.132	0.000192	0.616085	0.63001
DCAF8	7.11e-09	0.01992	0.109	0.142	0.000199	0.690783	0.704591
KPNA1	7.61e-09	-0.04147	0.132	0.167	0.000213	0.852381	0.823639
FBXO9	8.1e-09	0.026241	0.123	0.157	0.000226	0.749411	0.7676
RNF10	8.21e-09	-0.01438	0.076	0.101	0.000229	0.514351	0.504383
LINC02802	8.58e-09	0.006885	0.089	0.118	0.00024	0.610764	0.615536
SRGAP2	8.67e-09	0.005876	0.074	0.1	0.000242	0.510323	0.514396
UGP2	8.74e-09	-0.03495	0.158	0.196	0.000244	1.12427	1.10004
SNHG14	8.96e-09	-0.00562	0.395	0.466	0.00025	1.88588	1.88199
RPL35A	9.01e-09	0.083262	0.162	0.205	0.000252	0.925473	0.983186
SOS2	9.13e-09	0.009239	0.137	0.174	0.000255	0.822646	0.829049
ASXL1	9.48e-09	0.026071	0.22	0.271	0.000265	1.18911	1.20718
ZBTB8A	9.51e-09	-0.02474	0.078	0.104	0.000266	0.560609	0.543464
GIGYF1	9.57e-09	0.005072	0.097	0.126	0.000267	0.651007	0.654523
SPTLC1	9.66e-09	0.003899	0.086	0.114	0.00027	0.540138	0.542841
NR2F1-AS1	9.96e-09	0.022757	0.134	0.17	0.000278	0.805639	0.821412
RAD23B	1e-08	0.028731	0.102	0.133	0.00028	0.625038	0.644953
TNS1	1.01e-08	0.008213	0.204	0.249	0.000283	1.17122	1.17692
PRPF8	1.09e-08	0.052558	0.126	0.161	0.000305	0.752521	0.788952
TTC21B	1.11e-08	-0.01189	0.086	0.113	0.00031	0.562746	0.554505
TMEM87A	1.14e-08	0.010677	0.112	0.144	0.000319	0.694485	0.701886
GOLGB1	1.18e-08	-0.00439	0.437	0.522	0.000331	1.99478	1.99174
ARIH2	1.18e-08	0.023004	0.103	0.133	0.000331	0.651892	0.667837
ZNF91	1.2e-08	0.054186	0.175	0.22	0.000334	0.933662	0.971221
UBAP2L	1.23e-08	0.005519	0.089	0.116	0.000344	0.576426	0.580251
CFAP69	1.23e-08	0.044314	0.104	0.134	0.000344	0.693887	0.724603
LAMA2	1.24e-08	0.035333	0.224	0.274	0.000347	1.2879	1.31239
ZFHX4	1.25e-08	0.010314	0.138	0.175	0.000349	0.897438	0.904587
DMXL1	1.26e-08	0.015134	0.101	0.131	0.000352	0.635587	0.646077
ZRANB2	1.29e-08	0.214014	0.585	0.613	0.00036	2.15272	2.30106
RBBP4	1.32e-08	0.01065	0.14	0.177	0.00037	0.800249	0.807631
KIAA0319L	1.34e-08	-0.01152	0.095	0.124	0.000375	0.627523	0.619539
PDXDC1	1.35e-08	-0.01666	0.204	0.25	0.000378	1.13124	1.11969
SPECC1L	1.41e-08	0.0436	0.134	0.17	0.000393	0.818468	0.848689
RARRES1	1.43e-08	-0.02203	0.102	0.13	0.0004	0.836095	0.820828
DCAF16	1.46e-08	-0.02022	0.079	0.105	0.000409	0.529271	0.515254
RABGEF1	1.51e-08	-0.00693	0.082	0.109	0.000421	0.564958	0.560154
TGFBR2	1.51e-08	0.010375	0.106	0.137	0.000422	0.665332	0.672524
IWS1	1.54e-08	0.008539	0.119	0.152	0.000432	0.773829	0.779748
SIN3B	1.55e-08	0.034419	0.171	0.214	0.000434	0.984076	1.00793
ARL6IP4	1.57e-08	0.019457	0.086	0.113	0.000439	0.565011	0.578498
CEP164	1.58e-08	-0.00275	0.133	0.168	0.000442	0.830915	0.829009
BRAF	1.59e-08	0.087017	0.205	0.257	0.000445	1.06523	1.12555
AC005670.3	1.67e-08	0.056982	0.096	0.125	0.000468	0.577592	0.617089
WASHC4	1.74e-08	0.061446	0.126	0.161	0.000486	0.728827	0.771418
STAG2	1.74e-08	0.023943	0.121	0.155	0.000487	0.729258	0.745854
PDCD4	1.8e-08	0.013649	0.14	0.177	0.000504	0.828167	0.837627
PRRC2C	1.83e-08	-0.04486	0.483	0.575	0.000511	2.08114	2.05004
KHDC4	1.87e-08	0.053764	0.126	0.161	0.000523	0.732478	0.769744
FAM120A	1.89e-08	0.059662	0.128	0.164	0.000529	0.739803	0.781158
GABPB1-AS1	1.95e-08	0.010876	0.253	0.306	0.000544	1.36858	1.37612
LRPPRC	1.96e-08	0.014011	0.114	0.147	0.000549	0.70993	0.719642
WDR45B	2e-08	-0.01005	0.082	0.108	0.00056	0.565967	0.559002
PER2	2.01e-08	0.030063	0.154	0.193	0.00056	0.964782	0.985621
ADGRA3	2.01e-08	0.019147	0.115	0.147	0.000563	0.718306	0.731578
ARHGAP21	2.15e-08	-0.00019	0.41	0.491	0.0006	1.85624	1.85611
HUWE1	2.15e-08	0.060043	0.153	0.193	0.000601	0.882236	0.923854
TRPM7	2.17e-08	0.022946	0.157	0.197	0.000608	0.897525	0.91343
GOSR1	2.18e-08	0.048133	0.096	0.125	0.00061	0.582813	0.616177
HNRNPA1	2.33e-08	0.039844	0.166	0.208	0.00065	0.887359	0.914977
ACOT9	2.39e-08	0.043547	0.112	0.144	0.000667	0.709579	0.739764
DDX19A	2.39e-08	0.03116	0.082	0.108	0.000667	0.540041	0.561639
RREB1	2.4e-08	0.019796	0.078	0.103	0.000672	0.535758	0.549479
RPAIN	2.45e-08	0.028774	0.077	0.103	0.000684	0.480415	0.50036
ANXA1	2.54e-08	0.043209	0.262	0.315	0.000709	1.59688	1.62682
NCBP3	2.62e-08	0.006188	0.214	0.263	0.000731	1.17001	1.1743
KIDINS220	2.64e-08	0.05572	0.237	0.292	0.000738	1.19734	1.23597
ST5	2.66e-08	0.054534	0.189	0.233	0.000744	1.07787	1.11567
AL021368.2	2.74e-08	0.06428	0.096	0.125	0.000766	0.546345	0.5909
NPLOC4	2.89e-08	0.020019	0.084	0.111	0.000808	0.568833	0.582709
AP2A1	2.9e-08	0.02281	0.091	0.118	0.00081	0.593841	0.609652
SYNE1	2.95e-08	-0.03644	0.51	0.593	0.000823	2.29731	2.27205
AIMP1	2.95e-08	0.017101	0.081	0.107	0.000825	0.530288	0.542141
MAP4	2.97e-08	0.018591	0.284	0.343	0.000831	1.44443	1.45732
AP1G1	3.09e-08	0.01896	0.101	0.13	0.000864	0.627649	0.640791
ATAD2B	3.14e-08	0.02118	0.142	0.178	0.000878	0.829392	0.844073
SMG6	3.15e-08	0.001706	0.116	0.148	0.000881	0.71135	0.712532
NPIPB5	3.17e-08	0.053698	0.227	0.28	0.000887	1.16058	1.19781
UQCRC2	3.39e-08	0.032844	0.088	0.115	0.000947	0.550697	0.573463
GPATCH8	3.44e-08	0.061155	0.199	0.247	0.000962	1.05429	1.09668
CEP112	3.56e-08	0.032296	0.111	0.142	0.000995	0.711007	0.733393
ADAMTS9	3.59e-08	-0.02161	0.141	0.175	0.001002	1.05804	1.04306
SIK3	3.65e-08	0.022513	0.129	0.163	0.001019	0.796771	0.812376
MYO6	3.65e-08	0.004794	0.089	0.116	0.001019	0.601871	0.605193
VPS13B	3.7e-08	0.013184	0.223	0.271	0.001033	1.16018	1.16932
CHD6	3.73e-08	0.040782	0.162	0.201	0.001042	0.923274	0.951542
LGALS3	3.75e-08	0.016095	0.098	0.126	0.001049	0.614719	0.625876
HSP90B1	3.86e-08	-0.02654	0.271	0.326	0.001077	1.43898	1.42059
SLMAP	4.03e-08	0.62458	0.168	0.148	0.001125	0.797187	1.23011
TAOK3	4.06e-08	0.007081	0.121	0.152	0.001136	0.784067	0.788975
DHX15	4.15e-08	0.009729	0.116	0.148	0.001158	0.705806	0.71255
DENND4C	4.16e-08	0.01232	0.092	0.12	0.001163	0.597157	0.605697
MTAP	4.19e-08	0.032899	0.079	0.104	0.00117	0.486225	0.509029
LINC00342	4.2e-08	0.093912	0.238	0.295	0.001174	1.21253	1.27763
APPL1	4.23e-08	0.024859	0.087	0.114	0.001183	0.552013	0.569244
EPB41L2	4.44e-08	0.023089	0.286	0.347	0.001239	1.45373	1.46974
RBM12B	4.51e-08	0.025314	0.082	0.108	0.001261	0.492892	0.510438
DCAF6	4.7e-08	0.057363	0.096	0.124	0.001314	0.600391	0.640152
HNRNPD	4.71e-08	0.025041	0.183	0.225	0.001316	1.02145	1.03881
MPHOSPH10	4.82e-08	0.011331	0.087	0.114	0.001346	0.576148	0.584002
STK4	4.95e-08	0.005623	0.094	0.122	0.001384	0.596628	0.600525
MON2	5.04e-08	0.06895	0.246	0.303	0.001409	1.20172	1.24952
UBXN4	5.08e-08	0.042869	0.225	0.276	0.001418	1.13707	1.16679
GARS-DT	5.09e-08	0.072292	0.2	0.247	0.001423	1.06293	1.11304
ATXN2L	5.23e-08	0.002513	0.091	0.118	0.00146	0.610934	0.612676
OTUD4	5.58e-08	0.022381	0.085	0.111	0.001559	0.575821	0.591335
UBE2I	5.8e-08	0.059292	0.14	0.176	0.001621	0.794507	0.835605
TCF7L2	5.85e-08	0.054859	0.13	0.165	0.001635	0.736508	0.774533
RNF216	5.92e-08	0.050268	0.138	0.173	0.001653	0.806757	0.8416
ELN	6e-08	-0.05285	0.143	0.178	0.001676	1.07316	1.03652
GPATCH2	6.07e-08	0.023628	0.127	0.16	0.001696	0.753118	0.769495
SSB	6.27e-08	0.033647	0.081	0.107	0.001753	0.542172	0.565494
XPO1	6.32e-08	0.045477	0.136	0.171	0.001767	0.780943	0.812465
CHURC1	6.53e-08	0.038145	0.09	0.116	0.001826	0.545333	0.571773
MGST3	6.6e-08	0.039993	0.08	0.105	0.001845	0.5074	0.535121
DAAM1	6.66e-08	0.0341	0.246	0.298	0.001862	1.37265	1.39628
CD47	6.71e-08	0.057006	0.093	0.121	0.001874	0.560357	0.599871
EHBP1L1	6.79e-08	0.029403	0.114	0.145	0.001898	0.726048	0.746429
LMBR1L	6.81e-08	0.03303	0.109	0.139	0.001902	0.703535	0.72643
ATP8B2	7.1e-08	0.013867	0.097	0.124	0.001983	0.644194	0.653806
LARP1	7.17e-08	0.024625	0.12	0.152	0.002005	0.738627	0.755696
AFF1	7.19e-08	0.068846	0.203	0.25	0.002008	1.06869	1.11641
FAM133B	7.24e-08	0.020704	0.414	0.492	0.002022	1.88362	1.89797
LINC01355	7.41e-08	0.010295	0.077	0.101	0.00207	0.485013	0.492148
HMGN2	7.42e-08	0.061407	0.123	0.156	0.002072	0.706705	0.749269
OXR1	7.46e-08	0.013367	0.076	0.101	0.002085	0.510025	0.51929
38777	7.49e-08	0.051738	0.197	0.243	0.002094	1.00154	1.0374
PAFAH1B1	7.51e-08	0.063505	0.234	0.287	0.002099	1.15902	1.20304
HERC2	7.73e-08	0.009811	0.29	0.35	0.00216	1.42473	1.43153
HIF3A	7.75e-08	0.279621	0.101	0.08	0.002165	0.568248	0.762066
PARP14	7.82e-08	-0.02504	0.202	0.246	0.002184	1.15105	1.13369
PTK2	7.96e-08	0.044698	0.16	0.198	0.002224	0.896893	0.927875
CREBZF	7.98e-08	0.081997	0.234	0.288	0.00223	1.14088	1.19772
ILK	8.06e-08	0.02759	0.118	0.15	0.002252	0.744283	0.763406
ACBD6	8.09e-08	0.019716	0.084	0.109	0.002261	0.544122	0.557788
CUL5	8.1e-08	0.031247	0.094	0.122	0.002264	0.571615	0.593274
CAPRIN2	8.16e-08	0.02335	0.076	0.1	0.002281	0.513286	0.529471
OPA1	8.18e-08	-0.0182	0.081	0.106	0.002286	0.546929	0.534312
RB1CC1	8.49e-08	0.05155	0.237	0.289	0.002371	1.25057	1.2863
CRYBG3	8.5e-08	-0.01815	0.212	0.255	0.002376	1.23007	1.21749
SF1	8.57e-08	0.00182	0.418	0.503	0.002394	1.79693	1.79819
LRBA	9.03e-08	-0.00506	0.078	0.102	0.002523	0.547718	0.544208
MEIS1	9.31e-08	0.389169	0.311	0.305	0.002602	1.30106	1.57081
IGFBP6	9.35e-08	0.347333	0.13	0.108	0.002614	0.627862	0.868615
IVNS1ABP	9.55e-08	0.033701	0.132	0.166	0.002667	0.802414	0.825774
EMP2	9.66e-08	0.059915	0.086	0.112	0.0027	0.563512	0.605041
TTC19	9.99e-08	0.061484	0.127	0.161	0.002792	0.761501	0.804119
GULP1	1.02e-07	0.023571	0.092	0.118	0.002857	0.569584	0.585921
USP8	1.02e-07	0.035073	0.193	0.237	0.002859	1.10797	1.13228
IPO5	1.03e-07	0.030133	0.08	0.104	0.002891	0.513248	0.534135
PPHLN1	1.04e-07	0.052617	0.091	0.118	0.002893	0.553669	0.59014
SMAD4	1.07e-07	0.024524	0.143	0.178	0.00299	0.804513	0.821512
PCGF3	1.08e-07	-0.01685	0.086	0.111	0.003005	0.564447	0.552765
ATF7IP	1.08e-07	0.02603	0.136	0.17	0.003008	0.816156	0.834198
CEBPZ	1.1e-07	0.0662	0.156	0.194	0.003086	0.886575	0.932461
GON4L	1.12e-07	0.043993	0.194	0.238	0.003117	1.05123	1.08173
USP7	1.13e-07	0.051835	0.112	0.143	0.003144	0.671715	0.707645
MDN1	1.16e-07	0.045788	0.114	0.144	0.003243	0.734148	0.765886
FBXW7	1.17e-07	0.038119	0.094	0.121	0.003261	0.62532	0.651741
COL6A1	1.18e-07	0.32237	0.523	0.554	0.003285	2.075	2.29845
ANKLE2	1.18e-07	0.043149	0.276	0.334	0.003302	1.41429	1.4442
ZC2HC1A	1.2e-07	0.04731	0.105	0.135	0.003349	0.626702	0.659495
DNAJC21	1.22e-07	0.057559	0.101	0.129	0.003407	0.637984	0.677882
RPS6KB1	1.23e-07	0.036689	0.099	0.127	0.00343	0.60019	0.62562
RPAP2	1.26e-07	0.084417	0.129	0.162	0.003523	0.773586	0.8321
[truncated: 147 more rows]
