# Supplementary material for: Dienogest interrupts the chemokine signalling axis in endometriotic lesions with resistant signatures providing novel opportunities for personalised treatment.
Source: Research Square preprint supplement (doi:10.21203/rs.3.rs-8096027/v1), 2026-01-13
Supplement: Supplementary file 4 [file 7936fef3186e08f693aa0e25.xlsx]

## Sheet: Sheet1
Supplementary Table 10: DEG between responders and non-responders in endothelial cells
gene_ID	p_val	avg_log2FC	pct.1	pct.2	p_val_adj	mean_treated	mean_untreaded
PLCG2	7.52352e-45	-1.35187	0.718	0.878	2.10207e-40	5.19048	4.25343
RPS6	2.27759e-18	-1.09697	0.188	0.377	6.36357e-14	1.92549	1.16513
RPL17	7.4025e-16	-0.635147	0.192	0.38	2.06826e-11	1.68468	1.24443
AQP1	2.03798e-14	-0.912237	0.153	0.311	5.6941e-10	1.74111	1.10879
IFI27	2.16668e-14	-0.749559	0.09	0.226	6.05371e-10	1.15717	0.637614
RPS18	2.2395e-14	-0.751305	0.17	0.339	6.25717e-10	1.60091	1.08015
RPL39	2.29153e-14	-0.642375	0.144	0.307	6.40253e-10	1.46297	1.01771
TPT1	2.80286e-14	-0.59992	0.321	0.523	7.83118e-10	2.14997	1.73414
RPL28	3.61386e-14	-0.76189	0.178	0.347	1.00971e-09	1.63588	1.10778
RPL26	1.02595e-13	-0.740364	0.139	0.293	2.86649e-09	1.47263	0.959449
AIDA	1.11767e-13	-0.499701	0.08	0.212	3.12277e-09	1.00321	0.656848
RPL19	1.33196e-13	-0.671782	0.112	0.255	3.72148e-09	1.25315	0.787507
ADGRL4	1.42763e-13	-0.536939	0.147	0.312	3.9888e-09	1.39298	1.0208
RPL7	1.65839e-13	-0.741565	0.122	0.267	4.63354e-09	1.29233	0.778315
CCL14	1.98475e-13	-0.928472	0.061	0.174	5.5454e-09	1.17256	0.528993
COL15A1	2.9795e-13	-0.434006	0.082	0.212	8.32473e-09	1.00681	0.705984
RPL22	4.77362e-13	-0.661299	0.154	0.311	1.33375e-08	1.45792	0.999545
RPS17	6.9777e-13	-0.537677	0.072	0.191	1.94957e-08	0.899071	0.526382
SPRY1	7.59231e-13	-0.852366	0.368	0.547	2.12129e-08	2.89239	2.30158
GFOD1	7.82508e-13	-0.594036	0.108	0.247	2.18633e-08	1.19951	0.787759
RPS23	1.24026e-12	-0.704829	0.138	0.283	3.46527e-08	1.44394	0.955385
GSN	1.54439e-12	-0.504344	0.274	0.462	4.31504e-08	2.13452	1.78493
RPS11	2.07314e-12	-0.634924	0.117	0.255	5.79236e-08	1.25475	0.814657
RPL18A	2.28604e-12	-0.668377	0.113	0.248	6.3872e-08	1.20425	0.740966
RPL23	2.66074e-12	-0.66251	0.134	0.278	7.43412e-08	1.31022	0.851001
RPL13	2.93835e-12	-0.698933	0.321	0.5	8.20976e-08	2.23372	1.74926
RPL13A	4.39577e-12	-0.612673	0.205	0.368	1.22818e-07	1.65574	1.23106
RPL32	4.94605e-12	-0.723259	0.198	0.352	1.38193e-07	1.76638	1.26506
TMSB10	5.31782e-12	-0.60265	0.255	0.427	1.4858e-07	1.99757	1.57984
RAPGEF3	1.01027e-11	-0.527991	0.187	0.349	2.8227e-07	1.64929	1.28332
RPS13	1.03285e-11	-0.61082	0.096	0.219	2.88578e-07	1.07972	0.65633
RPS12	1.09787e-11	-0.63372	0.145	0.286	3.06746e-07	1.46419	1.02493
RPLP2	1.16187e-11	-0.833915	0.135	0.271	3.24627e-07	1.48054	0.902511
RPL36	1.17025e-11	-0.573087	0.156	0.306	3.26967e-07	1.47088	1.07365
RPS16	1.39439e-11	-0.612665	0.155	0.306	3.89593e-07	1.41488	0.99021
NOTCH4	1.86364e-11	-0.503416	0.23	0.396	5.20702e-07	1.95793	1.60899
FOSL2	2.15384e-11	-0.552193	0.242	0.415	6.01782e-07	1.84827	1.46552
RPL35A	2.23083e-11	-0.679791	0.115	0.243	6.23294e-07	1.26942	0.79822
RPLP1	2.2461e-11	-0.514149	0.237	0.405	6.2756e-07	1.83261	1.47623
EPAS1	2.25835e-11	-0.582802	0.284	0.462	6.30982e-07	1.97263	1.56866
NACA	3.05547e-11	-0.590827	0.118	0.25	8.53699e-07	1.22156	0.812028
ACTG1	3.07111e-11	-0.59193	0.266	0.434	8.58067e-07	1.93116	1.52087
PRCP	3.50764e-11	-0.594956	0.046	0.137	9.80034e-07	0.717994	0.305602
ENTPD1	3.51333e-11	-0.536361	0.253	0.425	9.81624e-07	1.95913	1.58735
RPS19	4.87211e-11	-0.511506	0.144	0.285	1.36127e-06	1.3152	0.960652
RPS2	4.93081e-11	-0.675457	0.216	0.368	1.37767e-06	1.69245	1.22426
SPARC	6.50062e-11	-0.531122	0.143	0.283	1.81627e-06	1.33308	0.964933
RPL37A	9.15778e-11	-0.593523	0.186	0.332	2.55868e-06	1.55923	1.14783
FZD4	1.10991e-10	-0.519503	0.091	0.207	3.10109e-06	1.05504	0.694951
PTMA	1.23705e-10	-0.475589	0.448	0.628	3.45632e-06	2.60299	2.27333
Z97192.3	1.29738e-10	-0.391427	0.043	0.13	3.62487e-06	0.663389	0.392072
RPL34	1.85804e-10	-0.718896	0.208	0.356	5.19136e-06	1.78256	1.28426
RPL18	1.8845e-10	-0.552647	0.095	0.21	5.2653e-06	1.02758	0.644516
PKHD1L1	1.9846e-10	1.11908	0.217	0.094	5.54498e-06	1.18539	1.96107
SPARCL1	2.25642e-10	-0.644386	0.456	0.615	6.30444e-06	2.83957	2.39292
PECAM1	2.34493e-10	-0.49186	0.266	0.431	6.55174e-06	1.91275	1.57182
RPS14	3.32244e-10	-0.61591	0.147	0.278	9.2829e-06	1.39157	0.964655
RPL9	3.7371e-10	-0.592307	0.163	0.299	1.04414e-05	1.44023	1.02967
KCTD12	3.88957e-10	-0.57291	0.139	0.267	1.08675e-05	1.32598	0.928865
RPL15	3.97257e-10	-0.511153	0.11	0.231	1.10994e-05	1.07029	0.715986
APOLD1	4.33358e-10	-0.562714	0.219	0.366	1.2108e-05	1.75012	1.36008
JAG1	4.50031e-10	-0.557221	0.124	0.25	1.25739e-05	1.30814	0.921902
CAVIN2	4.88854e-10	-0.454653	0.163	0.302	1.36586e-05	1.51191	1.19677
RPL29	5.61368e-10	-0.583427	0.097	0.207	1.56846e-05	1.07707	0.672673
RPL7A	8.02206e-10	-0.512766	0.133	0.26	2.24136e-05	1.26586	0.910436
ERGIC1	8.48492e-10	-0.568277	0.083	0.186	2.37069e-05	0.967937	0.574037
CD93	1.02787e-09	-0.412968	0.345	0.519	2.87188e-05	2.2348	1.94855
CLEC14A	1.23897e-09	-0.422644	0.044	0.125	3.46168e-05	0.623215	0.33026
RPL8	1.29889e-09	-0.652604	0.142	0.267	3.62909e-05	1.40231	0.949958
GNG11	1.31682e-09	-0.480264	0.092	0.2	3.67921e-05	0.986707	0.653814
S1PR1	1.39017e-09	-0.526841	0.086	0.191	3.88413e-05	1.00239	0.637213
RPL37	1.57077e-09	-0.468051	0.213	0.365	4.38872e-05	1.66682	1.34239
SERF2	1.68621e-09	-0.437596	0.118	0.236	4.71126e-05	1.05499	0.751667
CAV1	1.74396e-09	-0.443383	0.192	0.34	4.87263e-05	1.59813	1.2908
IFI44L	2.22273e-09	-0.517328	0.115	0.233	6.2103e-05	1.30548	0.946898
HBEGF	2.55503e-09	-0.356817	0.04	0.118	7.13877e-05	0.688893	0.441566
A2M	2.6499e-09	-0.477127	0.249	0.399	7.40381e-05	1.89021	1.55949
RPS24	3.00448e-09	-0.556844	0.298	0.444	8.39452e-05	1.99996	1.61398
RPL21	3.66059e-09	-0.573393	0.178	0.309	0.000102277	1.5363	1.13885
RPL11	3.80449e-09	-0.493234	0.218	0.366	0.000106297	1.65944	1.31756
EMCN	4.71072e-09	-0.470508	0.211	0.356	0.000131618	1.63451	1.30838
PLVAP	4.88209e-09	-0.467298	0.078	0.175	0.000136406	0.936994	0.613087
RPS27	5.27868e-09	-0.587219	0.186	0.316	0.000147486	1.57308	1.16605
LIFR	5.82882e-09	-0.688898	0.258	0.396	0.000162857	2.1851	1.70759
RPL24	5.8429e-09	-0.450448	0.119	0.236	0.000163251	1.14723	0.835007
RPS25	5.91702e-09	-0.618508	0.167	0.29	0.000165321	1.3987	0.969987
SH3BGRL2	6.52896e-09	-0.40658	0.032	0.101	0.000182419	0.565199	0.283379
RPL23A	9.63981e-09	-0.430506	0.107	0.215	0.000269336	1.04434	0.745938
RPS15A	1.0836e-08	-0.529719	0.133	0.25	0.000302757	1.25636	0.88919
FBXO31	1.2371e-08	-0.395749	0.048	0.127	0.000345645	0.734926	0.460614
MRTFB	1.32951e-08	-0.320873	0.226	0.377	0.000371466	1.66476	1.44235
DOCK9	1.4809e-08	-0.372373	0.305	0.474	0.000413764	1.9049	1.64679
TXNIP	1.63644e-08	-0.589605	0.263	0.399	0.000457221	2.0787	1.67001
IL6ST	1.74679e-08	-0.320472	0.397	0.564	0.000488053	2.22478	2.00264
B2M	1.82966e-08	-0.44487	0.472	0.615	0.000511207	2.52549	2.21713
SERINC3	1.97516e-08	-0.293163	0.075	0.167	0.000551859	0.767237	0.564032
RNF115	2.01746e-08	-0.44997	0.17	0.295	0.000563678	1.39671	1.08482
SLFN5	2.12364e-08	-0.558034	0.113	0.219	0.000593344	1.1852	0.798403
BTG2	2.4698e-08	-0.651415	0.124	0.233	0.000690061	1.38488	0.93335
THBD	2.61542e-08	-0.485857	0.15	0.269	0.000730749	1.36081	1.02404
PODXL	2.70015e-08	-0.456997	0.213	0.347	0.000754422	1.66616	1.34939
CYYR1	2.81718e-08	-0.424	0.063	0.148	0.000787121	0.75403	0.460136
PTPRB	3.51375e-08	-0.423726	0.293	0.446	0.000981741	1.90487	1.61116
KLF7	3.53571e-08	-0.410162	0.202	0.34	0.000987878	1.51114	1.22683
TCF4	3.68666e-08	-0.37649	0.482	0.622	0.00103005	2.57913	2.31816
MT-CO1	4.75347e-08	0.285379	0.869	0.866	0.00132812	3.9218	4.11961
NEDD9	4.97457e-08	-0.2967	0.266	0.425	0.00138989	1.83844	1.63279
MYH9	5.2314e-08	-0.417851	0.238	0.38	0.00146165	1.68538	1.39574
TSC22D3	5.24098e-08	-0.489498	0.125	0.233	0.00146433	1.17167	0.832373
ITM2B	5.74612e-08	-0.399465	0.227	0.363	0.00160547	1.56379	1.2869
SYNJ2BP	5.92598e-08	-0.388085	0.044	0.116	0.00165572	0.64167	0.37267
RPL3	6.2085e-08	-0.482579	0.183	0.307	0.00173466	1.54691	1.21241
RPL27	7.15758e-08	-0.416259	0.06	0.139	0.00199983	0.721349	0.43282
PTPRG	7.97766e-08	-0.421782	0.146	0.26	0.00222896	1.33786	1.0455
MCF2L	8.54471e-08	-0.295396	0.221	0.356	0.00238739	1.63097	1.42622
RPS20	8.62516e-08	-0.514814	0.116	0.217	0.00240987	1.14763	0.790784
MMRN2	9.68557e-08	-0.508129	0.066	0.146	0.00270615	0.816184	0.463976
RPS15	9.84093e-08	-0.438766	0.151	0.264	0.00274956	1.3037	0.999567
MT-ATP6	1.10712e-07	0.390457	0.829	0.825	0.00309331	3.73129	4.00194
CCL21	1.1214e-07	1.17312	0.147	0.061	0.00313318	0.767836	1.58098
ITGA10	1.18696e-07	-0.417335	0.074	0.16	0.00331638	0.958262	0.668987
RPL35	1.32911e-07	-0.477568	0.146	0.259	0.00371353	1.31501	0.983988
ECE1	1.3332e-07	-0.294478	0.13	0.241	0.00372495	1.12005	0.915937
SNRK	1.41511e-07	-0.394983	0.101	0.2	0.00395381	1.01269	0.738908
WWTR1	1.41819e-07	-0.468299	0.181	0.299	0.00396241	1.49392	1.16932
FGD4	1.44135e-07	-0.277051	0.067	0.151	0.00402712	0.763748	0.571711
EIF3F	1.45244e-07	-0.391715	0.055	0.13	0.00405812	0.68585	0.414334
RPL14	1.50446e-07	-0.379846	0.143	0.252	0.00420346	1.2056	0.942307
SHROOM4	1.506e-07	-0.48121	0.16	0.273	0.00420777	1.47247	1.13892
NFE2L1	1.52641e-07	-0.49346	0.105	0.2	0.00426478	1.04513	0.703087
NRP1	1.7222e-07	-0.357516	0.18	0.306	0.00481181	1.48426	1.23645
NHSL2	2.04671e-07	-0.339462	0.085	0.174	0.00571851	0.893266	0.657969
ZBTB16	2.6108e-07	-0.389626	0.323	0.464	0.00729459	2.07374	1.80367
BTF3	2.61334e-07	-0.304105	0.055	0.128	0.00730166	0.612727	0.401938
PIK3R3	2.68688e-07	-0.452525	0.208	0.335	0.00750715	1.7757	1.46203
RPS28	3.00763e-07	-0.532382	0.24	0.363	0.00840331	1.78411	1.4151
NFIB	3.12504e-07	-0.398832	0.344	0.49	0.00873136	1.94951	1.67306
CFH	3.13458e-07	-0.396592	0.122	0.222	0.00875801	1.18795	0.913056
TPM1	3.26087e-07	-0.652512	0.24	0.366	0.00911088	1.97042	1.51814
TMCC3	3.49714e-07	-0.326879	0.045	0.113	0.00977101	0.588159	0.361584
C2CD2	3.62789e-07	-0.395516	0.043	0.108	0.0101363	0.638378	0.364227
HSPG2	3.88753e-07	-0.372042	0.274	0.41	0.0108618	1.81054	1.55266
MRPL33	3.89914e-07	-0.36023	0.043	0.108	0.0108942	0.573756	0.324064
ITPRIP	4.1485e-07	-0.408454	0.093	0.182	0.0115909	0.965401	0.682282
ACTB	4.37565e-07	-0.37571	0.33	0.472	0.0122256	2.03486	1.77444
PALMD	4.39857e-07	-0.32872	0.235	0.368	0.0122896	1.70458	1.47673
XAF1	4.64369e-07	-0.284275	0.303	0.444	0.0129745	2.03761	1.84056
RPS3A	5.56368e-07	-0.552797	0.163	0.267	0.0155449	1.42303	1.03986
RPS4X	5.60635e-07	-0.417698	0.137	0.24	0.0156641	1.21828	0.928757
TCIM	5.9749e-07	-0.720824	0.101	0.186	0.0166939	1.32986	0.830218
CTTNBP2NL	5.97725e-07	-0.362844	0.174	0.29	0.0167004	1.37703	1.12552
CALM1	6.64026e-07	-0.380228	0.229	0.356	0.0185529	1.62615	1.3626
NOP53	6.70587e-07	-0.437495	0.072	0.149	0.0187362	0.834307	0.531059
LPP	6.7926e-07	-0.253904	0.187	0.311	0.0189785	1.31763	1.14164
GNAS	7.28124e-07	-0.324709	0.257	0.394	0.0203438	1.68578	1.46071
RPL38	7.34626e-07	-0.460579	0.139	0.24	0.0205255	1.23619	0.91694
GNB4	7.64748e-07	-0.361375	0.099	0.188	0.0213671	0.931804	0.681317
LNPEP	7.67229e-07	-0.333633	0.086	0.172	0.0214364	0.822312	0.591055
RPS27A	7.86039e-07	-0.422721	0.179	0.293	0.0219619	1.42879	1.13578
PLEKHA3	8.01745e-07	-0.222429	0.04	0.102	0.0224007	0.502226	0.348051
RPS29	9.1756e-07	-0.392371	0.147	0.25	0.0256366	1.23293	0.960964
PTPN14	9.45393e-07	-0.29615	0.2	0.323	0.0264143	1.43043	1.22516
TLNRD1	1.0226e-06	-0.30912	0.041	0.102	0.0285715	0.528446	0.31418
RPL27A	1.09099e-06	-0.415631	0.123	0.217	0.0304823	1.0632	0.775108
AL627171.2	1.11959e-06	-0.341502	0.131	0.231	0.0312813	1.18032	0.943604
RPL12	1.13002e-06	-0.518301	0.164	0.267	0.0315727	1.37901	1.01975
NKTR	1.13748e-06	0.414431	0.724	0.681	0.0317811	2.63312	2.92038
PREX2	1.20034e-06	-0.376205	0.219	0.34	0.0335375	1.56184	1.30107
NUCKS1	1.26167e-06	-0.360102	0.138	0.238	0.0352512	1.12744	0.87784
TMSB4X	1.42036e-06	-0.329445	0.233	0.361	0.0396848	1.58148	1.35313
EEF2	1.44634e-06	-0.197582	0.126	0.226	0.0404108	1.02578	0.888827
TSPAN7	1.51794e-06	-0.28893	0.048	0.113	0.0424113	0.597114	0.396843
KLF9	1.55849e-06	-0.277305	0.138	0.24	0.0435443	1.10814	0.915928
EEF1A1	1.69841e-06	-0.665698	0.4	0.517	0.0474537	2.43948	1.97805
SWAP70	1.70727e-06	-0.328923	0.18	0.293	0.047701	1.3902	1.16221
