# Supplementary material for: Dienogest interrupts the chemokine signalling axis in endometriotic lesions with resistant signatures providing novel opportunities for personalised treatment.
Source: Research Square preprint supplement (doi:10.21203/rs.3.rs-8096027/v1), 2026-01-13
Supplement: Supplementary file 5 [file 84f81a9f2d13c4bc0adcef95.xlsx]

## Sheet: Sheet1
Supplementary Table 9: DEG between responders and non-responders in myeloid cells
gene_ID	p_val	avg_log2FC	pct.1	pct.2	p_val_adj	mean_treated	mean_untreaded
ACSL1	2.19244e-65	-1.06763	0.249	0.528	6.12568e-61	2.23142	1.49139
SLC16A10	1.97846e-55	-1.21058	0.218	0.463	5.52783e-51	2.51967	1.68056
AREG	5.84332e-53	-1.49599	0.114	0.324	1.63262e-48	2.43569	1.39875
THBS1	7.04365e-52	-1.05998	0.435	0.663	1.968e-47	3.38432	2.6496
ELL2	3.65857e-51	-1.00257	0.214	0.457	1.02221e-46	2.04536	1.35042
SLC11A1	2.58819e-41	-0.839939	0.226	0.454	7.2314e-37	2.26531	1.68311
NAMPT	1.743e-40	-0.815722	0.396	0.615	4.86994e-36	2.7665	2.20108
FOSL2	1.78913e-40	-0.889939	0.234	0.448	4.99882e-36	2.03453	1.41767
HSP90AA1	4.51378e-38	-0.750942	0.479	0.66	1.26115e-33	3.69935	3.17884
RGS2	6.06066e-36	-0.893405	0.263	0.465	1.69335e-31	2.32606	1.7068
ATP1B3	7.64068e-35	-1.11376	0.218	0.4	2.13481e-30	2.21811	1.44611
ALPK3	8.46869e-34	-0.934657	0.038	0.154	2.36615e-29	0.988389	0.340534
IRAK3	2.95184e-33	-0.634216	0.261	0.469	8.24743e-29	1.94451	1.5049
DNAJB1	4.80251e-31	-0.610963	0.167	0.336	1.34182e-26	2.13999	1.71651
LINC02207	7.16058e-30	-0.771221	0.031	0.131	2.00066e-25	0.782644	0.248075
HSPA1A	5.33761e-29	-0.602711	0.247	0.424	1.49133e-24	2.37623	1.95846
THBD	1.25624e-28	-0.766062	0.07	0.196	3.50994e-24	1.10495	0.573954
GRASP	3.70131e-26	-0.698233	0.09	0.219	1.03415e-21	1.11704	0.63306
VDR	2.80835e-25	-0.728106	0.032	0.122	7.84653e-21	0.791033	0.286349
IVNS1ABP	1.33872e-24	-0.819227	0.296	0.453	3.74039e-20	2.08225	1.5144
CXCR4	2.46596e-24	-0.742522	0.112	0.243	6.88989e-20	1.27917	0.764496
HSPA1B	5.22898e-24	-0.541823	0.185	0.338	1.46098e-19	1.7778	1.40224
MXD1	3.55767e-23	-0.773167	0.119	0.25	9.94012e-19	1.38883	0.852914
AC037198.1	3.75264e-23	-0.551736	0.167	0.321	1.04849e-18	1.70658	1.32414
SH3BP5	8.36805e-23	-0.527058	0.243	0.41	2.33803e-18	1.75878	1.39345
GK	1.24194e-22	-0.710771	0.15	0.287	3.46997e-18	1.53872	1.04605
RILPL2	2.13709e-22	-0.602155	0.071	0.18	5.97103e-18	0.959746	0.542364
VEGFA	3.79212e-22	-0.615552	0.297	0.463	1.05952e-17	2.27672	1.85005
BTG1	4.70973e-22	-0.570759	0.25	0.409	1.3159e-17	1.8218	1.42619
DUSP4	5.12952e-22	-0.876113	0.032	0.114	1.43319e-17	0.92319	0.315915
LAPTM5	6.086e-22	-0.634486	0.182	0.323	1.70043e-17	1.44742	1.00763
MCL1	6.43948e-22	-0.475623	0.499	0.65	1.79919e-17	2.519	2.18932
NR4A3	1.29838e-21	-0.681578	0.084	0.196	3.62766e-17	1.14938	0.67695
HSPH1	3.1074e-21	-0.317169	0.24	0.386	8.68208e-17	2.35135	2.13151
NFIL3	1.18636e-20	-0.617749	0.066	0.166	3.31468e-16	0.915127	0.486936
PPP1R15A	1.30618e-20	-0.700324	0.158	0.289	3.64947e-16	1.53665	1.05123
KLHL6	1.45039e-20	-0.604998	0.151	0.284	4.0524e-16	1.38344	0.964086
USP53	1.99127e-20	-0.674798	0.321	0.465	5.56361e-16	2.21103	1.7433
PAX8-AS1	2.75233e-20	0.919596	0.201	0.086	7.69001e-16	0.587419	1.22483
TREM1	2.84984e-20	-0.577856	0.028	0.101	7.96246e-16	0.642162	0.241622
ETS2	7.47657e-20	-0.577314	0.212	0.356	2.08895e-15	1.66181	1.26165
TNFRSF25	8.60811e-20	0.903887	0.129	0.035	2.40511e-15	0.288855	0.915382
CCNH	1.53607e-19	-0.630823	0.161	0.289	4.29179e-15	1.37264	0.935389
SATB1	8.29005e-19	-0.602553	0.12	0.235	2.31624e-14	1.21313	0.795467
LUCAT1	9.7999e-19	-0.59285	0.074	0.174	2.73809e-14	1.18622	0.775286
HSPE1	2.0442e-18	-0.553867	0.109	0.22	5.71151e-14	1.30207	0.918162
ITPR2	3.63067e-18	0.659124	0.487	0.373	1.01441e-13	1.68561	2.14248
SRGN	4.70317e-18	-0.478208	0.352	0.502	1.31407e-13	2.151	1.81953
KCNE1	6.03519e-18	-0.517687	0.058	0.147	1.68623e-13	0.884243	0.52541
SAP30	7.85673e-18	-0.562363	0.086	0.186	2.19517e-13	0.998999	0.609198
PAPOLG	9.94003e-18	-0.575517	0.091	0.192	2.77724e-13	1.04498	0.646062
FGD4	1.08167e-17	-0.609332	0.201	0.33	3.0222e-13	1.56572	1.14337
KYNU	1.29487e-17	-0.634672	0.096	0.197	3.61786e-13	1.05819	0.618264
SLC9A9	1.3048e-17	0.788491	0.196	0.089	3.64562e-13	0.503028	1.04957
SYTL3	1.34232e-17	-0.455615	0.143	0.267	3.75044e-13	1.37878	1.06297
FRMD4B	2.33137e-17	0.700595	0.423	0.301	6.51386e-13	1.48247	1.96809
SIPA1L1	2.88926e-17	-0.481611	0.286	0.43	8.0726e-13	1.87213	1.5383
ITGAX	4.56148e-17	-0.697526	0.239	0.37	1.27448e-12	2.0772	1.59371
SMAP2	5.13036e-17	-0.49678	0.209	0.345	1.43342e-12	1.60798	1.26364
EREG	5.83392e-17	-0.716173	0.032	0.1	1.63e-12	0.931632	0.435219
IGKC	5.8787e-17	-0.667199	0.089	0.19	1.64251e-12	1.23519	0.772719
MMP19	9.36217e-17	-0.748422	0.133	0.245	2.61579e-12	1.80935	1.29058
SDCBP	1.05015e-16	-0.604998	0.184	0.306	2.93412e-12	1.49043	1.07108
TLR2	1.41244e-16	-0.457408	0.303	0.444	3.94636e-12	1.95359	1.63654
ATP13A3	1.89155e-16	-0.59055	0.256	0.387	5.285e-12	1.80328	1.39394
RAPGEF1	2.31887e-16	-0.531671	0.217	0.347	6.47894e-12	1.54667	1.17814
RNF144B	2.62571e-16	-0.589443	0.145	0.258	7.33622e-12	1.33077	0.922201
REL	3.04628e-16	-0.575417	0.361	0.488	8.51131e-12	2.14252	1.74367
NEAT1	3.24548e-16	-0.282764	0.996	0.998	9.06787e-12	5.60565	5.40965
AC020916.1	9.55104e-16	-0.33745	0.493	0.653	2.66856e-11	2.96204	2.72814
C5AR1	9.91958e-16	-0.531881	0.176	0.294	2.77153e-11	1.46852	1.09984
FMN1	1.24513e-15	-0.473181	0.243	0.374	3.47889e-11	1.71159	1.3836
MAT2A	1.40525e-15	-0.408173	0.336	0.474	3.92627e-11	2.03286	1.74993
MT-ND2	1.53264e-15	-0.328527	0.702	0.8	4.28221e-11	3.59107	3.36336
GRAMD1B	2.01191e-15	-0.569977	0.051	0.126	5.62128e-11	0.758259	0.363181
IRS2	3.04442e-15	-0.516823	0.089	0.181	8.50611e-11	0.975577	0.617342
HBEGF	3.72087e-15	-0.651354	0.155	0.263	1.03961e-10	1.56059	1.1091
CD163L1	3.83326e-15	0.860127	0.217	0.115	1.07101e-10	0.855465	1.45166
LRRK2	3.95808e-15	-0.452578	0.156	0.269	1.10589e-10	1.30061	0.986909
AL627171.2	8.11893e-15	-0.596627	0.112	0.21	2.26843e-10	1.21618	0.802626
MT-ND3	8.58601e-15	-0.331442	0.755	0.831	2.39893e-10	3.91385	3.68412
ZFAND5	9.7841e-15	-0.61772	0.251	0.368	2.73368e-10	1.78331	1.35514
PTK2B	1.19461e-14	-0.450788	0.088	0.18	3.33775e-10	0.994712	0.682249
AGO2	2.55986e-14	-0.472653	0.19	0.306	7.15224e-10	1.43896	1.11135
RHOB	2.78443e-14	-0.494038	0.098	0.189	7.77969e-10	1.0354	0.692958
LGMN	3.602e-14	0.764802	0.246	0.144	1.0064e-09	0.915147	1.44527
FTH1	4.58428e-14	-0.305471	0.545	0.69	1.28085e-09	2.85883	2.64709
PHACTR1	5.06718e-14	-0.564545	0.146	0.246	1.41577e-09	1.31521	0.923901
RGS1	5.34662e-14	-0.379328	0.269	0.407	1.49385e-09	2.0422	1.77927
GFOD1	6.92849e-14	-0.515035	0.062	0.139	1.93582e-09	0.881752	0.524757
PLCG2	7.93509e-14	-0.709951	0.622	0.674	2.21706e-09	3.90838	3.41628
CEMIP2	8.03824e-14	-0.566784	0.199	0.308	2.24588e-09	1.59293	1.20007
APP	1.10982e-13	-0.41982	0.182	0.296	3.10085e-09	1.38998	1.09898
DGKA	2.76715e-13	-0.376155	0.177	0.29	7.73143e-09	1.3908	1.13007
AC093849.4	4.47574e-13	-0.41867	0.047	0.113	1.25052e-08	0.710253	0.420053
MT-ND1	4.48986e-13	-0.245559	0.662	0.775	1.25447e-08	3.40974	3.23953
PDE4B	4.74324e-13	-0.447348	0.143	0.242	1.32526e-08	1.22576	0.915677
HIF1A	5.00581e-13	-0.353921	0.368	0.503	1.39862e-08	2.10938	1.86406
TET2	5.46828e-13	-0.498349	0.298	0.413	1.52784e-08	1.77025	1.42482
IER5	5.80932e-13	-0.663733	0.069	0.143	1.62312e-08	0.992707	0.532642
HSPD1	7.44584e-13	-0.383008	0.221	0.326	2.08037e-08	1.90827	1.64279
SLA	7.67577e-13	-0.352969	0.248	0.369	2.14461e-08	1.68855	1.44389
SARAF	1.12573e-12	-0.401939	0.141	0.24	3.14528e-08	1.08237	0.803764
ATP2A2	1.6201e-12	-0.557135	0.195	0.3	4.52655e-08	1.4893	1.10312
TSC22D3	1.96008e-12	-0.372311	0.233	0.354	5.47646e-08	1.65821	1.40014
GPR183	2.30029e-12	-0.524338	0.151	0.247	6.427e-08	1.30289	0.939449
CHML	2.40927e-12	-0.602804	0.089	0.169	6.7315e-08	1.08175	0.663917
RAB31	2.79706e-12	-0.455016	0.213	0.318	7.81498e-08	1.53366	1.21827
ZFP36	4.63701e-12	-0.388715	0.375	0.5	1.29558e-07	2.09296	1.82353
DUSP1	5.80795e-12	-0.338217	0.339	0.465	1.62274e-07	1.98962	1.75518
MS4A6A	7.60535e-12	0.575668	0.526	0.438	2.12494e-07	2.11306	2.51208
SLC2A3	8.07385e-12	-0.401344	0.296	0.411	2.25583e-07	2.17315	1.89496
CD44	8.98245e-12	-0.354941	0.382	0.501	2.5097e-07	2.38445	2.13842
FCGR2A	1.02195e-11	-0.546114	0.277	0.384	2.85534e-07	1.85003	1.4715
ZNF331	1.09943e-11	-0.487298	0.17	0.265	3.07181e-07	1.64517	1.3074
SYAP1	1.12671e-11	-0.333201	0.177	0.283	3.14804e-07	1.46245	1.2315
LPAR6	1.38362e-11	0.752309	0.28	0.189	3.86582e-07	1.05709	1.57855
FOSB	1.88546e-11	-0.412463	0.307	0.426	5.26799e-07	2.19204	1.90614
HMGB2	1.96638e-11	-0.376208	0.061	0.128	5.49407e-07	0.771776	0.511008
ACSL3	2.03727e-11	-0.399633	0.11	0.195	5.69213e-07	1.02411	0.747111
GNA13	2.08087e-11	-0.387045	0.17	0.265	5.81395e-07	1.23254	0.964256
ERRFI1	2.30856e-11	-0.459347	0.055	0.119	6.45012e-07	0.789052	0.470657
TANC2	2.44598e-11	-0.402673	0.108	0.19	6.83408e-07	0.956889	0.677777
RPS16	2.98952e-11	-0.295722	0.172	0.273	8.35271e-07	1.2026	0.997622
PPP1CB	3.22736e-11	-0.420754	0.159	0.253	9.01723e-07	1.20346	0.911817
AC007384.1	3.85529e-11	-0.430386	0.099	0.177	1.07717e-06	0.996444	0.698123
STK17B	4.13066e-11	-0.483964	0.191	0.287	1.15411e-06	1.41996	1.0845
NR4A1	4.47757e-11	-0.191984	0.357	0.488	1.25103e-06	2.27708	2.14401
MAF	4.60777e-11	0.755161	0.355	0.27	1.28741e-06	1.42452	1.94796
LILRB5	4.6082e-11	0.694033	0.275	0.186	1.28753e-06	1.12267	1.60374
AC104695.4	4.68684e-11	-0.453926	0.073	0.143	1.3095e-06	0.837665	0.523027
ADAP2	4.83822e-11	0.693024	0.308	0.223	1.3518e-06	1.13767	1.61804
UBC	5.54414e-11	-0.457311	0.227	0.328	1.54903e-06	1.76168	1.44469
IL1RAP	5.55586e-11	-0.377339	0.098	0.177	1.55231e-06	0.975786	0.714235
CEBPB	5.89615e-11	-0.409868	0.231	0.334	1.64739e-06	1.54124	1.25714
FTL	5.93078e-11	-0.481628	0.326	0.434	1.65706e-06	2.10529	1.77145
CMTM6	6.17836e-11	-0.461621	0.147	0.236	1.72623e-06	1.15053	0.830557
MED29	6.2382e-11	-0.396374	0.043	0.1	1.74295e-06	0.607149	0.332403
SRGAP3	6.44002e-11	0.626125	0.167	0.091	1.79934e-06	0.585643	1.01964
USP36	7.00111e-11	-0.466016	0.239	0.344	1.95611e-06	1.68325	1.36023
DAB2	7.55626e-11	0.622503	0.408	0.322	2.11122e-06	1.72002	2.1515
PAG1	9.6687e-11	-0.524544	0.129	0.213	2.70143e-06	1.27699	0.913408
DGKD	1.02516e-10	-0.353363	0.218	0.322	2.8643e-06	1.48957	1.24464
SAMSN1	1.24178e-10	-0.477959	0.234	0.332	3.46953e-06	1.70061	1.36932
CREM	1.26221e-10	-0.307025	0.245	0.35	3.52661e-06	1.57468	1.36186
NR4A2	1.30749e-10	-0.228782	0.237	0.347	3.65312e-06	1.80474	1.64617
CD163	1.40249e-10	-0.3894	0.5	0.609	3.91855e-06	2.81452	2.5446
PFKFB3	1.66787e-10	-0.340321	0.183	0.279	4.66002e-06	1.36867	1.13278
MEF2C	1.73163e-10	0.645238	0.405	0.325	4.83817e-06	1.54989	1.99714
KCTD20	1.8036e-10	-0.328849	0.096	0.172	5.03926e-06	0.869118	0.641178
CD14	2.36937e-10	0.649643	0.203	0.123	6.62003e-06	0.748034	1.19833
CHMP1B	2.75067e-10	-0.352534	0.087	0.159	7.68536e-06	0.869371	0.625014
FKBP5	3.00683e-10	-0.270184	0.378	0.511	8.40107e-06	2.22669	2.03941
HMOX1	3.77317e-10	-0.621155	0.098	0.172	1.05422e-05	1.38733	0.956777
GLUL	4.18198e-10	-0.388071	0.403	0.515	1.16845e-05	2.51366	2.24467
EDEM3	5.13043e-10	-0.306355	0.101	0.177	1.43344e-05	0.865518	0.653169
HIPK2	5.34533e-10	-0.432297	0.103	0.178	1.49348e-05	1.06644	0.766797
JARID2	6.56126e-10	-0.372747	0.203	0.299	1.83322e-05	1.40801	1.14964
CYBB	6.98458e-10	0.615366	0.197	0.121	1.95149e-05	0.695172	1.12171
RASSF4	7.7501e-10	0.513098	0.411	0.324	2.16538e-05	1.61352	1.96918
LIMS1	8.44895e-10	-0.355721	0.124	0.205	2.36064e-05	1.02896	0.782396
MT2A	1.02141e-09	-0.36711	0.111	0.187	2.85381e-05	1.13716	0.882696
UBE2D3	1.23638e-09	-0.358919	0.325	0.432	3.45444e-05	1.78722	1.53844
KLF4	1.48042e-09	-0.466762	0.083	0.15	4.13629e-05	0.928214	0.604679
ZNF445	1.48372e-09	-0.280966	0.175	0.265	4.14552e-05	1.30596	1.11121
YWHAZ	1.71745e-09	-0.323185	0.235	0.334	4.79857e-05	1.47611	1.2521
ZRANB2	1.7213e-09	0.485454	0.454	0.377	4.80931e-05	1.64446	1.98095
MTRNR2L12	1.74515e-09	-0.346256	0.582	0.672	4.87594e-05	3.08704	2.84704
JDP2	1.76586e-09	-0.33743	0.085	0.152	4.93382e-05	0.836632	0.602743
IL1R2	1.81994e-09	-0.614063	0.055	0.111	5.08491e-05	1.15134	0.725706
SLC36A4	1.96554e-09	-0.382148	0.07	0.132	5.49172e-05	0.724384	0.4595
PER1	2.07758e-09	-0.295088	0.177	0.269	5.80477e-05	1.31291	1.10837
MT-CO3	2.30854e-09	-0.204087	0.789	0.847	6.45007e-05	4.15195	4.01049
MALT1	3.43155e-09	-0.319598	0.189	0.281	9.58776e-05	1.35629	1.13476
SLC16A3	3.55573e-09	-0.402519	0.111	0.183	9.93471e-05	0.989126	0.710121
RHOQ	3.65888e-09	-0.409828	0.215	0.305	0.000102229	1.45845	1.17438
CDKN1A	3.99467e-09	-0.370098	0.063	0.122	0.000111611	0.70108	0.444548
PDE3B	4.1251e-09	-0.341885	0.099	0.168	0.000115255	0.88538	0.648403
NFIA	4.12781e-09	0.468099	0.335	0.248	0.000115331	1.4704	1.79486
SH3TC1	4.31291e-09	-0.28973	0.142	0.225	0.000120503	1.13814	0.937318
SGK1	4.42775e-09	-0.368309	0.309	0.408	0.000123711	2.10754	1.85224
AMPD2	6.47991e-09	-0.324176	0.076	0.138	0.000181049	0.770302	0.5456
FILIP1L	7.94342e-09	-0.271722	0.225	0.322	0.000221939	1.5847	1.39635
MAGT1	8.47581e-09	-0.360556	0.063	0.119	0.000236814	0.667987	0.418069
PLAUR	8.88626e-09	-0.35437	0.23	0.328	0.000248282	1.67391	1.42828
LYZ	1.15384e-08	-0.397949	0.078	0.139	0.000322382	0.946589	0.670752
KLF6	1.41026e-08	-0.358878	0.429	0.524	0.000394025	2.36612	2.11736
ARL8B	1.53677e-08	-0.314559	0.077	0.138	0.000429374	0.704561	0.486525
CTSD	1.53983e-08	-0.46749	0.116	0.184	0.000430228	1.08507	0.761032
FPR1	1.62392e-08	-0.35026	0.053	0.104	0.000453723	0.610824	0.368042
METRNL	1.68738e-08	-0.330438	0.218	0.312	0.000471453	1.4508	1.22175
MICAL2	1.72627e-08	-0.317078	0.078	0.138	0.000482319	0.767464	0.547682
MT-ND4L	1.80202e-08	-0.247765	0.407	0.514	0.000503486	2.36915	2.19741
HSPA6	1.87334e-08	-0.385988	0.147	0.222	0.000523412	1.2719	1.00436
RASGEF1B	2.27963e-08	-0.291012	0.194	0.283	0.00063693	1.49273	1.29102
C1orf162	2.34917e-08	-0.335422	0.11	0.179	0.000656358	0.932368	0.699871
TPT1	2.597e-08	-0.29783	0.323	0.423	0.000725603	1.7877	1.58126
JOSD1	2.74091e-08	-0.273793	0.126	0.199	0.000765811	0.950633	0.760854
EMILIN2	2.79982e-08	-0.244027	0.138	0.217	0.000782271	1.0359	0.866755
CCDC144A	3.05495e-08	0.58289	0.304	0.232	0.000853554	1.1697	1.57373
VCAN	3.19951e-08	-0.519253	0.223	0.306	0.000893942	2.06146	1.70154
MT-ND5	3.24072e-08	-0.2012	0.621	0.714	0.000905458	3.16636	3.02689
GPR132	3.26173e-08	-0.303338	0.057	0.11	0.000911328	0.681703	0.471445
KLF9	3.37601e-08	-0.221286	0.088	0.153	0.000943257	0.811408	0.658025
FES	3.45577e-08	-0.274864	0.094	0.159	0.000965541	0.881688	0.691166
MT-ND4	3.52966e-08	-0.216127	0.752	0.813	0.000986188	3.82585	3.67604
TNFAIP3	3.5829e-08	-0.253426	0.212	0.3	0.00100106	1.5833	1.40764
EDEM1	3.80435e-08	-0.429602	0.083	0.143	0.00106294	0.824893	0.527115
LDLRAD4	3.87634e-08	-0.296584	0.153	0.232	0.00108305	1.11572	0.910145
HSPA8	4.02463e-08	-0.316991	0.123	0.193	0.00112448	1.09993	0.880209
SERINC5	4.22598e-08	-0.367418	0.157	0.234	0.00118074	1.20703	0.95236
HNRNPU	4.36615e-08	-0.349751	0.665	0.722	0.0012199	2.88053	2.6381
MSI2	4.5986e-08	-0.336398	0.102	0.168	0.00128485	0.979994	0.746821
TNFRSF1B	4.83184e-08	-0.194527	0.284	0.387	0.00135002	1.64537	1.51053
SNX9	4.8862e-08	-0.303382	0.168	0.249	0.0013652	1.23743	1.02714
ATF3	5.16213e-08	-0.381387	0.118	0.186	0.0014423	1.1488	0.884448
ERGIC1	5.38434e-08	-0.353921	0.145	0.22	0.00150438	1.1598	0.914482
TRA2B	5.5318e-08	-0.289897	0.397	0.493	0.00154558	2.00338	1.80244
RPL17	5.80751e-08	-0.300645	0.178	0.257	0.00162262	1.22597	1.01758
SKIL	5.96995e-08	-0.297134	0.241	0.334	0.001668	1.50711	1.30116
CTNNB1	6.05676e-08	-0.323381	0.334	0.429	0.00169226	1.84228	1.61813
IL13RA1	6.08274e-08	-0.311455	0.156	0.233	0.00169952	1.12805	0.912162
DNMBP	7.03817e-08	-0.274023	0.091	0.155	0.00196646	0.866698	0.67676
PHC2	7.5123e-08	-0.279885	0.083	0.143	0.00209894	0.814958	0.620957
SPTLC2	8.69561e-08	-0.362684	0.127	0.196	0.00242955	1.03974	0.788342
HSP90AB1	8.72505e-08	-0.215037	0.236	0.326	0.00243778	1.59908	1.45003
MEF2A	9.49385e-08	0.469405	0.442	0.381	0.00265258	1.66473	1.99009
SOCS3	9.56398e-08	-0.326179	0.135	0.205	0.00267217	1.11385	0.88776
ATP6V1B2	9.9671e-08	-0.341972	0.166	0.241	0.00278481	1.22875	0.991709
AC008105.3	1.03629e-07	-0.373269	0.079	0.136	0.00289539	0.865999	0.607269
CTSB	1.06823e-07	-0.329865	0.541	0.623	0.00298462	2.72649	2.49785
RPL39	1.10109e-07	-0.412466	0.109	0.172	0.00307644	1.03256	0.746663
UBXN2B	1.22483e-07	-0.332604	0.075	0.13	0.00342218	0.706511	0.475967
HLA-DRA	1.23724e-07	-0.491026	0.345	0.423	0.00345686	2.17621	1.83586
TMCC3	1.24238e-07	-0.242011	0.07	0.124	0.00347122	0.712278	0.544528
CYTH4	1.366e-07	0.432846	0.274	0.196	0.00381662	1.14925	1.44927
BCL2L11	1.54921e-07	-0.33176	0.079	0.135	0.00432849	0.793107	0.563149
ZC3H18	1.68046e-07	-0.351625	0.158	0.231	0.00469519	1.16719	0.923462
EZR	1.70684e-07	-0.341873	0.123	0.19	0.00476891	1.09137	0.854403
HERPUD1	1.82847e-07	-0.358963	0.319	0.402	0.00510874	1.95758	1.70877
PPP1R10	1.83416e-07	-0.299932	0.172	0.249	0.00512464	1.16436	0.956466
CD55	1.9507e-07	-0.343859	0.138	0.208	0.00545025	1.11323	0.87488
SLC38A2	2.02222e-07	-0.385405	0.195	0.273	0.00565007	1.39913	1.13198
GPAT4	2.14065e-07	-0.325578	0.08	0.136	0.00598097	0.822094	0.59642
MT-CO2	2.16256e-07	-0.176246	0.767	0.816	0.00604219	3.98273	3.86057
OAZ1	2.18183e-07	-0.316859	0.136	0.204	0.00609604	1.01769	0.798062
MKNK1	2.58911e-07	0.440045	0.308	0.238	0.00723397	1.22516	1.53018
WASHC2A	2.72939e-07	0.845924	0.105	0.056	0.00762592	0.405873	0.992223
APAF1	2.92671e-07	-0.281733	0.126	0.193	0.00817723	0.937865	0.742583
DAGLB	2.93521e-07	-0.274041	0.077	0.132	0.00820099	0.713559	0.523609
TMEM39A	2.96593e-07	-0.310962	0.054	0.1	0.0082868	0.582387	0.366845
DPYSL2	3.19879e-07	0.507393	0.197	0.133	0.00893743	0.784165	1.13586
PER3	3.32979e-07	0.429883	0.159	0.099	0.00930344	0.676852	0.974824
NUFIP2	3.36933e-07	-0.276115	0.257	0.342	0.00941391	1.49324	1.30185
SOD2	3.45917e-07	-0.395184	0.238	0.318	0.00966493	1.70334	1.42942
GNAI3	3.53782e-07	-0.362989	0.155	0.225	0.00988468	1.16816	0.91656
PRKAG2	3.6563e-07	-0.305148	0.349	0.435	0.0102157	1.93489	1.72338
MFSD1	4.1623e-07	-0.283697	0.252	0.333	0.0116295	1.52417	1.32752
ARRDC3	4.23646e-07	-0.246253	0.148	0.219	0.0118367	1.0938	0.923109
HNMT	4.64481e-07	0.418263	0.1	0.052	0.0129776	0.314959	0.604877
ITPR1	4.64975e-07	-0.28643	0.133	0.2	0.0129914	1.09401	0.895471
SEC14L1	4.97202e-07	-0.30783	0.218	0.294	0.0138918	1.38815	1.17478
EEF1G	5.27286e-07	-0.264509	0.061	0.109	0.0147324	0.598333	0.414989
PARVG	5.42669e-07	-0.288573	0.217	0.3	0.0151622	1.4179	1.21788
MT-CO1	5.6502e-07	-0.146435	0.849	0.892	0.0157867	4.56982	4.46832
KCNQ1OT1	5.86479e-07	0.481571	0.311	0.24	0.0163862	1.46318	1.79698
IL1R1	5.9383e-07	-0.26116	0.086	0.142	0.0165916	0.799613	0.618591
SH3PXD2B	6.46055e-07	-0.266953	0.073	0.125	0.0180508	0.770443	0.585405
ABL2	6.46536e-07	-0.289942	0.245	0.327	0.0180642	1.6159	1.41493
PLXNC1	6.89962e-07	-0.29187	0.08	0.133	0.0192775	0.746989	0.54468
HSPA5	7.04753e-07	-0.393318	0.081	0.133	0.0196908	0.871309	0.598682
SLC1A3	7.34545e-07	-0.134347	0.199	0.285	0.0205232	1.45605	1.36292
CXCL3	7.40145e-07	-0.415169	0.063	0.111	0.0206796	1.02958	0.741806
MTSS1	7.63531e-07	0.44783	0.174	0.114	0.0213331	0.744367	1.05478
RANBP2	7.6879e-07	-0.249449	0.202	0.277	0.02148	1.32041	1.14751
IL10RA	7.77483e-07	0.518477	0.273	0.209	0.0217229	1.02297	1.38235
AP2A2	8.33761e-07	0.429787	0.443	0.381	0.0232953	1.79824	2.09614
ZC3HAV1	8.51258e-07	-0.382458	0.145	0.21	0.0237842	1.1533	0.8882
CHD9	8.94212e-07	0.426885	0.263	0.194	0.0249843	1.04685	1.34274
TUT4	9.04469e-07	0.543301	0.321	0.261	0.0252709	1.18229	1.55888
FGL2	9.15169e-07	-0.42633	0.273	0.348	0.0255698	1.80745	1.51195
CHST11	9.16834e-07	-0.231639	0.07	0.12	0.0256164	0.622745	0.462185
PDE4A	9.18461e-07	-0.401282	0.13	0.193	0.0256618	1.12208	0.843935
CTSL	9.24312e-07	-0.52621	0.194	0.264	0.0258253	1.8921	1.52736
WWP1	9.62545e-07	0.441719	0.162	0.104	0.0268935	0.669689	0.975866
HCLS1	1.03268e-06	-0.202126	0.332	0.419	0.0288531	1.78967	1.64957
GNAQ	1.03502e-06	-0.29622	0.162	0.231	0.0289184	1.1571	0.951774
WSB1	1.07811e-06	0.296117	0.618	0.577	0.0301224	2.25069	2.45594
BCAT1	1.11922e-06	-0.221442	0.105	0.164	0.031271	0.860274	0.706783
STAT3	1.12546e-06	-0.187548	0.358	0.455	0.0314452	1.79571	1.66571
PLEKHG2	1.14784e-06	-0.267398	0.109	0.17	0.0320708	0.941968	0.756621
CELF2	1.16534e-06	-0.257277	0.386	0.476	0.0325595	2.06069	1.88236
PNRC1	1.33436e-06	-0.289137	0.198	0.273	0.0372821	1.25669	1.05628
AKAP9	1.34674e-06	0.32629	0.538	0.481	0.0376278	2.05835	2.28451
TOB2	1.37754e-06	-0.240435	0.078	0.13	0.0384886	0.743985	0.577329
EIF1	1.5522e-06	-0.269166	0.223	0.301	0.0433683	1.34009	1.15352
WLS	1.5546e-06	0.43298	0.122	0.071	0.0434356	0.469657	0.769776
RCSD1	1.57104e-06	0.542593	0.23	0.167	0.0438948	0.946505	1.3226
