# Supplementary material for: Dienogest interrupts the chemokine signalling axis in endometriotic lesions with resistant signatures providing novel opportunities for personalised treatment.
Source: Research Square preprint supplement (doi:10.21203/rs.3.rs-8096027/v1), 2026-01-13
Supplement: Supplementary file 6 [file 9ca5a08b015ea594c1f9026f.xlsx]

## Sheet: Sheet1
Supplementary Table 6: DEG between responders and non-responders in epithelial cells
gene_ID	p_val	avg_log2FC	pct.1	pct.2	p_val_adj	mean_treated	mean_untreaded
CPM	5.74291e-148	-1.84799	0.174	0.507	1.60457e-143	2.30907	1.02814
ADAMTS6	9.19102e-231	-1.72515	0.013	0.299	2.56797e-226	1.30395	0.108165
BTG2	9.71304e-66	-1.72363	0.16	0.363	2.71382e-61	2.19048	0.995753
HSPA1A	4.26923e-157	-1.69859	0.097	0.417	1.19282e-152	1.95619	0.778823
HSPH1	4.40567e-83	-1.69213	0.185	0.425	1.23094e-78	2.56053	1.38763
HMGCS1	6.9299e-43	-1.68215	0.118	0.275	1.93621e-38	1.89296	0.726985
LAMC2	2.57615e-108	-1.65052	0.155	0.452	7.19776e-104	2.56712	1.42307
HSPE1	1.24447e-81	-1.62252	0.087	0.295	3.47705e-77	1.73982	0.615176
HSPB1	2.38753e-93	-1.54271	0.124	0.372	6.67076e-89	2.13686	1.06753
HSP90AA1	4.35601e-70	-1.42843	0.399	0.608	1.21707e-65	3.30412	2.31401
GPRC5A	3.81178e-95	-1.37572	0.153	0.422	1.06501e-90	1.99352	1.03994
CXCL3	8.81284e-54	-1.35272	0.065	0.214	2.46231e-49	1.71743	0.779793
TCIM	1.6201e-104	-1.30725	0.174	0.474	4.52656e-100	2.1828	1.27668
PLAUR	8.18413e-83	-1.28919	0.086	0.3	2.28665e-78	1.4919	0.598302
TNFAIP3	2.21203e-61	-1.27939	0.134	0.333	6.1804e-57	1.95081	1.064
ANXA1	1.37851e-95	-1.27033	0.2	0.494	3.85157e-91	2.27296	1.39244
PPP1R15A	2.13458e-88	-1.26202	0.109	0.346	5.96402e-84	1.7419	0.867135
AC020916.1	7.44914e-126	-1.25507	0.399	0.711	2.08129e-121	3.18311	2.31316
SEMA4A	1.50565e-70	-1.23918	0.046	0.204	4.20678e-66	1.28315	0.424213
CREB5	2.24715e-146	-1.23845	0.049	0.312	6.27855e-142	1.21945	0.361029
PGR	3.36044e-79	-1.23738	0.102	0.316	9.38906e-75	1.49579	0.638109
NRP2	1.05892e-77	-1.2132	0.179	0.431	2.95862e-73	2.10897	1.26804
SOD2	6.69822e-39	-1.1897	0.321	0.497	1.87148e-34	2.91374	2.0891
IRF1	3.12785e-43	-1.18666	0.166	0.337	8.73922e-39	1.96241	1.13988
LMNA	1.57858e-80	-1.17859	0.322	0.594	4.41056e-76	2.57033	1.75339
NPAS3	6.42748e-101	-1.17682	0.058	0.273	1.79584e-96	1.19484	0.379128
DNAJB1	4.02006e-113	-1.16226	0.101	0.371	1.1232e-108	1.89062	1.085
TFPI2	1.95111e-69	-1.14487	0.061	0.232	5.4514e-65	1.23226	0.438696
PLCB1	1.81548e-119	-1.14239	0.144	0.459	5.07246e-115	1.65248	0.860632
SAT1	9.90308e-69	-1.11938	0.766	0.862	2.76692e-64	4.10853	3.33263
CD55	3.95173e-97	-1.11637	0.178	0.473	1.10411e-92	1.95109	1.17728
NEAT1	9.11735e-153	-1.09621	0.98	0.989	2.54739e-148	5.73793	4.97809
SERPINH1	4.34546e-63	-1.09197	0.045	0.193	1.21412e-58	1.09754	0.340646
TLE1	2.98978e-47	-1.0883	0.216	0.42	8.35345e-43	1.90875	1.1544
ESR1	3.31398e-87	-1.07704	0.171	0.439	9.25925e-83	1.7333	0.986757
BIRC3	2.92316e-24	-1.04887	0.191	0.324	8.1673e-20	2.20626	1.47924
ARL5B	1.46136e-67	-1.03214	0.059	0.226	4.08305e-63	1.06325	0.347829
SLFN5	9.39441e-66	-1.02699	0.139	0.353	2.6248e-61	1.55005	0.838197
HSPA1B	4.93854e-125	-1.02404	0.084	0.366	1.37983e-120	1.29235	0.582536
MTLN	2.2934e-49	-1.0207	0.036	0.152	6.40776e-45	0.999816	0.292318
THEM4	5.01317e-65	-1.01845	0.126	0.333	1.40068e-60	1.45922	0.753288
TRMT9B	4.01778e-66	-1.01713	0.121	0.326	1.12257e-61	1.39743	0.692403
LRRC41	3.42055e-64	-0.997439	0.195	0.431	9.55701e-60	1.86633	1.17496
CRISPLD1	1.45619e-102	-0.987011	0.022	0.19	4.0686e-98	0.848316	0.164172
HSPA6	1.67831e-61	-0.962557	0.018	0.127	4.68919e-57	0.873435	0.206241
RDH10	6.85947e-104	-0.962051	0.049	0.26	1.91654e-99	0.984778	0.317936
EGR3	2.30616e-85	-0.953541	0.045	0.226	6.44342e-81	1.0165	0.355554
ATP2B4	1.06896e-86	-0.948969	0.123	0.375	2.98669e-82	1.39355	0.735771
NR4A3	6.11552e-77	-0.947252	0.037	0.195	1.70868e-72	0.920692	0.264106
TMEM120B	5.99537e-91	-0.944459	0.097	0.339	1.67511e-86	1.25062	0.59597
EMP1	3.20419e-37	-0.9302	0.114	0.26	8.95249e-33	1.46146	0.816698
LINC01541	1.98582e-93	-0.929488	0.411	0.729	5.54837e-89	3.26822	2.62395
KDM6B	6.87114e-69	-0.926496	0.141	0.371	1.9198e-64	1.52728	0.885082
FOSL2	3.40311e-86	-0.923503	0.152	0.418	9.50828e-82	1.58434	0.94422
PMAIP1	2.56254e-116	-0.916297	0.017	0.193	7.15975e-112	0.760173	0.125044
SLC47A1	2.07658e-120	-0.909442	0.044	0.271	5.80197e-116	0.941398	0.311021
ITPKC	5.38497e-67	-0.90822	0.055	0.221	1.50456e-62	1.07853	0.449004
KLF6	2.054e-44	-0.897819	0.367	0.566	5.73887e-40	2.47777	1.85545
DIO2	5.2565e-50	-0.89775	0.037	0.157	1.46866e-45	0.951224	0.328952
SGK1	8.73778e-41	-0.897164	0.122	0.282	2.44134e-36	1.57192	0.950052
UCA1	6.4338e-55	-0.892402	0.194	0.415	1.7976e-50	1.84271	1.22414
SOX4	5.4402e-58	-0.892281	0.18	0.403	1.51999e-53	1.83865	1.22017
ATF3	5.7067e-91	-0.876427	0.138	0.411	1.59445e-86	1.79343	1.18594
SOX5	4.45177e-80	-0.876167	0.105	0.336	1.24382e-75	1.23571	0.628402
PTGES3	2.74715e-43	-0.874826	0.123	0.286	7.67554e-39	1.28478	0.678398
NR4A1	2.34909e-85	-0.864609	0.272	0.577	6.56335e-81	2.46586	1.86656
RND3	2.82612e-56	-0.863702	0.109	0.296	7.89619e-52	1.30521	0.706534
EPB41L2	3.5356e-74	-0.861039	0.185	0.448	9.87845e-70	1.66105	1.06422
PODXL	3.39398e-70	-0.848673	0.183	0.435	9.48278e-66	1.71669	1.12844
ZC3HAV1	5.20368e-41	-0.84703	0.14	0.306	1.45391e-36	1.41068	0.823559
EVL	7.63405e-80	-0.845172	0.124	0.37	2.13295e-75	1.37803	0.792201
ELOVL5	7.62369e-72	-0.833667	0.032	0.177	2.13006e-67	0.792662	0.214807
NFKBID	1.12801e-50	-0.82262	0.09	0.256	3.15167e-46	1.1876	0.617408
NFKBIA	2.57524e-45	-0.820557	0.208	0.403	7.19521e-41	1.93213	1.36337
CADM1	1.32908e-79	-0.818104	0.089	0.307	3.71346e-75	1.13661	0.569541
IRF6	1.06767e-77	-0.815144	0.045	0.216	2.98306e-73	0.871722	0.306707
CD109	1.20135e-100	-0.814932	0.015	0.169	3.35658e-96	0.692017	0.127149
C2orf88	1.23622e-65	-0.808941	0.133	0.352	3.454e-61	1.31809	0.75737
USP53	7.5195e-29	-0.808133	0.371	0.534	2.10095e-24	2.24748	1.68733
EBP	4.22337e-53	-0.804322	0.069	0.224	1.18001e-48	0.99067	0.433156
PLCG2	9.35215e-25	-0.80351	0.582	0.653	2.61299e-20	3.51703	2.96008
DNAJC10	2.00541e-46	-0.800497	0.2	0.41	5.60313e-42	1.61725	1.06239
PLEKHA4	3.9445e-68	-0.798213	0.055	0.222	1.10209e-63	0.971194	0.417915
ZNF592	2.47538e-67	-0.792433	0.099	0.303	6.91621e-63	1.13576	0.586487
CXCL1	8.0905e-37	-0.791237	0.044	0.148	2.26049e-32	1.02407	0.475624
PFKFB3	1.77511e-63	-0.790886	0.075	0.254	4.95965e-59	1.06765	0.519454
MCL1	1.28138e-55	-0.790647	0.217	0.445	3.58017e-51	1.74868	1.20065
MAFF	5.08921e-64	-0.782205	0.093	0.286	1.42192e-59	1.16016	0.617979
SLC38A2	4.07465e-41	-0.780297	0.251	0.447	1.13846e-36	1.79827	1.25741
MIR4435-2HG	6.82222e-43	-0.772905	0.074	0.211	1.90613e-38	1.00654	0.470798
VCL	2.16939e-41	-0.768647	0.168	0.35	6.06127e-37	1.42814	0.895355
PGM2L1	1.71692e-39	-0.762721	0.141	0.305	4.79709e-35	1.28927	0.76059
VIM	4.4083e-51	-0.7539	0.233	0.461	1.23168e-46	1.79854	1.27598
MMP7	1.97024e-49	-0.74517	0.091	0.257	5.50485e-45	1.28223	0.765719
INSIG1	4.72336e-34	-0.74444	0.024	0.105	1.31971e-29	0.693547	0.177541
DNAJA4	1.53051e-33	-0.743642	0.068	0.183	4.27625e-29	1.16849	0.653033
GNAS	8.36166e-47	-0.734015	0.236	0.445	2.33625e-42	1.66199	1.15321
WEE1	2.00546e-46	-0.72927	0.189	0.392	5.60325e-42	1.55177	1.04628
DNAJA1	1.23411e-40	-0.729003	0.117	0.275	3.4481e-36	1.18634	0.681031
GLUL	9.02415e-30	-0.727298	0.12	0.254	2.52135e-25	1.22279	0.71867
SKIL	9.12338e-55	-0.72479	0.194	0.422	2.54907e-50	1.53547	1.03308
DLGAP1-AS1	2.93107e-56	-0.719346	0.071	0.234	8.1894e-52	0.947666	0.449054
LDLR	1.11982e-54	-0.717615	0.229	0.466	3.12877e-50	1.82056	1.32314
CTNNA2	3.23058e-53	-0.716318	0.044	0.177	9.02623e-49	0.85825	0.361736
UQCRH	1.21709e-31	-0.712621	0.224	0.391	3.40056e-27	1.81139	1.31744
GNB5	2.63236e-53	-0.709318	0.121	0.313	7.35482e-49	1.27578	0.78412
DNAJB6	5.47072e-40	-0.70841	0.224	0.42	1.52852e-35	1.69998	1.20895
DLGAP1-AS2	1.03624e-61	-0.706857	0.057	0.218	2.89526e-57	0.880135	0.390179
NAV2	2.69984e-41	-0.706329	0.12	0.283	7.54335e-37	1.24866	0.759066
TM4SF1	8.24795e-43	-0.699863	0.054	0.178	2.30448e-38	0.930836	0.445728
SERPINB9	4.4256e-43	-0.698941	0.047	0.164	1.23651e-38	0.792278	0.307809
AL079338.1	1.73258e-58	-0.696687	0.071	0.238	4.84083e-54	1.04098	0.558072
SQSTM1	1.04222e-39	-0.683914	0.164	0.344	2.91195e-35	1.45331	0.979258
FOSB	1.83243e-51	-0.682969	0.252	0.487	5.1198e-47	2.0735	1.6001
ADAM28	2.51141e-55	-0.680228	0.096	0.279	7.01687e-51	1.10303	0.631535
GPCPD1	1.04281e-42	-0.679356	0.166	0.356	2.91362e-38	1.36347	0.892572
ADAMTS1	2.20344e-21	-0.679253	0.143	0.26	6.15641e-17	1.55523	1.08441
SYT14	1.50518e-67	-0.677369	0.057	0.227	4.20547e-63	0.839436	0.369919
LIF	1.34691e-36	-0.675456	0.051	0.161	3.76327e-32	0.90331	0.435119
HSPD1	1.23988e-20	-0.673787	0.293	0.413	3.46422e-16	2.12724	1.66021
PLEKHG2	1.21904e-54	-0.672694	0.092	0.27	3.40599e-50	1.07563	0.609352
PAM	2.76926e-47	-0.671551	0.101	0.271	7.73732e-43	1.07598	0.610494
PCDH7	3.38247e-54	-0.668466	0.155	0.37	9.45061e-50	1.41314	0.949799
HNRNPU	8.18248e-25	-0.667672	0.682	0.736	2.28619e-20	3.00292	2.54013
ZFP36	2.07578e-51	-0.663225	0.205	0.431	5.79972e-47	1.61923	1.15952
MAP1B	9.48481e-34	-0.645791	0.031	0.119	2.65006e-29	0.747993	0.300365
TRDMT1	3.62071e-52	-0.641369	0.083	0.249	1.01163e-47	0.945877	0.501314
PNRC1	2.48743e-45	-0.639392	0.101	0.263	6.94988e-41	1.03523	0.592036
PALLD	3.40907e-35	-0.637427	0.145	0.307	9.52493e-31	1.24415	0.802319
UGCG	6.27428e-47	-0.634584	0.123	0.303	1.75304e-42	1.15092	0.711058
NRCAM	2.00211e-56	-0.633012	0.035	0.162	5.5939e-52	0.687988	0.249217
PTGS2	7.24951e-34	-0.62849	0.064	0.179	2.02551e-29	1.06573	0.630096
GALNT4	2.11345e-45	-0.628314	0.088	0.244	5.90499e-41	0.94502	0.509506
PKHD1L1	7.71786e-48	-0.627255	0.106	0.281	2.15637e-43	1.45072	1.01594
AC092803.1	8.42255e-72	-0.627087	0.01	0.118	2.35326e-67	0.507848	0.0731846
RTN4	6.69698e-40	-0.626773	0.188	0.375	1.87114e-35	1.42928	0.994837
BCAT1	2.66313e-59	-0.625037	0.03	0.155	7.44077e-55	0.646302	0.213059
ARHGAP29	1.861e-20	-0.621766	0.153	0.27	5.19964e-16	1.47152	1.04054
JUND	9.26321e-45	-0.617321	0.27	0.495	2.58814e-40	1.83699	1.4091
TRIM25	2.41169e-35	-0.615038	0.202	0.379	6.73827e-31	1.45168	1.02536
DST	6.99747e-27	-0.613063	0.387	0.573	1.95509e-22	2.29133	1.86639
ITGB8	4.7252e-37	-0.610873	0.326	0.537	1.32022e-32	2.15494	1.73151
PPP1R15B	2.36142e-40	-0.610852	0.074	0.209	6.59781e-36	0.846641	0.423231
SPTBN1	1.5324e-16	-0.610734	0.334	0.458	4.28153e-12	2.08245	1.65912
CSNK1E	1.36263e-37	-0.609759	0.226	0.422	3.80719e-33	1.51413	1.09148
SHROOM3	4.85227e-30	-0.608849	0.175	0.333	1.35572e-25	1.33702	0.914997
PLA2G4A	1.7441e-45	-0.607109	0.074	0.218	4.87302e-41	0.876502	0.455686
XPR1	4.55931e-58	-0.606289	0.045	0.187	1.27387e-53	0.694579	0.274331
F11R	3.9353e-45	-0.605131	0.141	0.327	1.09952e-40	1.18985	0.770406
DUSP2	1.30634e-62	-0.605114	0.068	0.243	3.64992e-58	1.05844	0.639004
TSC22D1	2.90603e-39	-0.604303	0.208	0.405	8.11944e-35	1.47809	1.05922
ACTN4	6.99185e-28	-0.604232	0.399	0.569	1.95352e-23	2.15792	1.7391
RHEX	3.03477e-46	-0.59562	0.084	0.239	8.47913e-42	0.958527	0.545675
CMTM6	1.1759e-52	-0.595164	0.079	0.243	3.28547e-48	0.864185	0.451649
UBB	7.7339e-56	-0.593729	0.027	0.144	2.16085e-51	0.604008	0.192466
EPS8L1	2.33838e-38	-0.592177	0.147	0.32	6.53342e-34	1.29105	0.880583
CYTOR	6.7213e-28	-0.589648	0.135	0.271	1.87793e-23	1.28567	0.87696
MECOM	1.55949e-27	-0.587821	0.406	0.572	4.35721e-23	2.18954	1.7821
PITPNC1	2.31825e-47	-0.586874	0.038	0.154	6.47718e-43	0.641486	0.234696
CCDC170	2.31852e-43	-0.586076	0.024	0.119	6.47795e-39	0.581396	0.17516
HMGCR	7.43617e-32	-0.583856	0.143	0.294	2.07767e-27	1.23941	0.834713
HSPA8	1.0422e-35	-0.583801	0.097	0.237	2.91191e-31	1.00849	0.603827
IER3	8.05334e-48	-0.58329	0.181	0.393	2.2501e-43	1.63779	1.23348
ICAM1	1.37524e-38	-0.583003	0.031	0.126	3.84242e-34	0.670335	0.266228
AC025423.4	8.6092e-84	-0.582842	0.015	0.149	2.40541e-79	0.513635	0.109639
CTSB	3.92712e-41	-0.582413	0.19	0.391	1.09724e-36	1.45059	1.0469
TPM4	2.42749e-34	-0.580883	0.294	0.489	6.7824e-30	1.90949	1.50686
UGT2B7	1.63046e-49	-0.580504	0.125	0.315	4.55552e-45	1.17891	0.776534
CCND1	6.53748e-31	-0.579675	0.134	0.279	1.82657e-26	1.19806	0.796259
SEMA3B	3.90313e-35	-0.575095	0.275	0.481	1.09054e-30	1.95782	1.55919
GATA2	4.53812e-47	-0.572963	0.046	0.171	1.26795e-42	0.716439	0.319291
FRMD4B	3.86697e-37	-0.572734	0.183	0.366	1.08043e-32	1.42092	1.02393
CD83	8.97537e-49	-0.570687	0.018	0.112	2.50772e-44	0.534234	0.138664
CXCL8	4.4227e-15	-0.570639	0.044	0.103	1.2357e-10	1.03133	0.635789
ADCYAP1R1	1.8114e-53	-0.564014	0.053	0.198	5.06105e-49	0.761046	0.370101
ARMCX3	3.94802e-43	-0.563209	0.086	0.236	1.10308e-38	0.882491	0.492104
GATA2-AS1	2.64989e-51	-0.562792	0.071	0.227	7.40378e-47	0.851839	0.461742
COL4A5	4.94338e-34	-0.561549	0.024	0.105	1.38118e-29	0.558599	0.169362
SPRY1	1.96723e-29	-0.559124	0.19	0.353	5.49645e-25	1.57784	1.19029
C1orf74	1.98621e-56	-0.551717	0.011	0.103	5.54946e-52	0.462508	0.0800875
CLIP1	5.31912e-31	-0.55045	0.302	0.493	1.48616e-26	1.84045	1.45891
WWTR1	2.98319e-40	-0.548227	0.097	0.248	8.33503e-36	1.00017	0.620165
DENND3	3.11418e-27	-0.546839	0.063	0.162	8.70101e-23	0.803047	0.424007
GCNT1	3.59049e-39	-0.546786	0.072	0.204	1.00318e-34	0.829977	0.450974
LINC00472	4.69089e-39	-0.546001	0.299	0.526	1.31063e-34	2.22205	1.84359
ELP3	4.28992e-32	-0.544221	0.06	0.168	1.1986e-27	0.785545	0.408319
B2M	4.72284e-33	-0.543764	0.295	0.48	1.31956e-28	1.8013	1.42439
C12orf45	3.83082e-21	-0.54255	0.139	0.256	1.07033e-16	1.12756	0.751491
TPM3	2.05204e-25	-0.541699	0.28	0.449	5.73339e-21	1.6765	1.30102
EGOT	2.21503e-34	-0.537287	0.039	0.134	6.18879e-30	0.77696	0.404542
AC016831.1	6.9389e-41	-0.536969	0.114	0.277	1.93873e-36	1.06227	0.690075
FLNA	1.09944e-28	-0.53326	0.142	0.283	3.07183e-24	1.23335	0.863722
EZR	1.31811e-36	-0.529232	0.251	0.455	3.6828e-32	1.79047	1.42364
KRTCAP2	2.67092e-39	-0.528734	0.045	0.156	7.46254e-35	0.662267	0.295776
CHORDC1	2.67892e-32	-0.527909	0.165	0.323	7.4849e-28	1.27263	0.906715
ANXA2	8.05238e-26	-0.527903	0.244	0.408	2.24983e-21	1.60711	1.2412
FOS	1.10252e-42	-0.526238	0.349	0.591	3.08044e-38	2.27758	1.91282
AFF4	1.55732e-32	-0.519958	0.286	0.489	4.35114e-28	1.66788	1.30748
SLC12A7	7.48199e-38	-0.519457	0.173	0.357	2.09047e-33	1.40229	1.04223
MUC16	5.49903e-33	-0.518432	0.323	0.547	1.53643e-28	2.28381	1.92446
NDRG1	1.26208e-16	-0.517166	0.105	0.195	3.52625e-12	1.05141	0.692936
HCP5	5.9959e-60	-0.516806	0.03	0.157	1.67526e-55	0.544134	0.185912
CGAS	1.44634e-44	-0.516241	0.028	0.129	4.04107e-40	0.531575	0.173744
HSPB8	1.01827e-51	-0.5148	0.02	0.12	2.84505e-47	0.488469	0.131637
ZNF516	7.70077e-39	-0.511117	0.099	0.249	2.1516e-34	0.936775	0.582496
CERNA2	2.53015e-48	-0.511057	0.024	0.127	7.06923e-44	0.523231	0.168993
CNTNAP3B	9.3729e-37	-0.510806	0.032	0.126	2.61879e-32	0.595907	0.241843
NMRK1	1.71507e-27	-0.510683	0.042	0.127	4.79191e-23	0.614896	0.260917
GADD45B	3.72927e-37	-0.510368	0.093	0.236	1.04196e-32	1.1409	0.787139
ID4	1.84029e-42	-0.510146	0.148	0.334	5.14178e-38	1.32213	0.968524
LINC00963	5.10424e-45	-0.506021	0.133	0.319	1.42612e-40	1.22624	0.875493
MSX1	2.09461e-36	-0.505702	0.065	0.187	5.85233e-32	0.811127	0.460602
SBNO2	2.47611e-38	-0.505219	0.113	0.27	6.91826e-34	1.05945	0.709255
BAG3	2.8129e-37	-0.504881	0.027	0.117	7.85925e-33	0.642525	0.292568
IVNS1ABP	1.38729e-21	-0.502824	0.245	0.398	3.87608e-17	1.5558	1.20727
GTF2I	1.94813e-29	-0.499582	0.432	0.622	5.44306e-25	2.14339	1.79711
WFDC2	1.24536e-42	-0.499204	0.119	0.29	3.47953e-38	1.12407	0.778051
PORCN	2.99405e-40	-0.497513	0.021	0.107	8.36537e-36	0.50409	0.15924
NR4A2	9.8183e-35	-0.496177	0.085	0.217	2.74323e-30	1.00844	0.664518
ZBTB37	2.64775e-29	-0.496108	0.09	0.21	7.39783e-25	0.815467	0.471592
CAPN12	2.40509e-21	-0.49566	0.08	0.176	6.71982e-17	0.905743	0.562178
SESTD1	2.01658e-35	-0.494056	0.136	0.296	5.63432e-31	1.10128	0.758825
COL6A1	1.32417e-18	-0.492523	0.104	0.202	3.69974e-14	1.06256	0.721165
ZFPM2-AS1	2.99117e-53	-0.491957	0.072	0.234	8.35733e-49	0.771796	0.430797
HMGA1	7.69932e-33	-0.491882	0.055	0.161	2.15119e-28	0.689594	0.348647
MEX3A	8.18022e-61	-0.490802	0.015	0.12	2.28555e-56	0.442835	0.102637
AC104695.4	8.00194e-49	-0.490522	0.04	0.162	2.23574e-44	0.613727	0.273723
MYH9	8.13339e-31	-0.488313	0.156	0.316	2.27247e-26	1.2311	0.892626
EEF1A1	7.89591e-31	-0.487678	0.394	0.588	2.20612e-26	2.08489	1.74686
UBE2H	3.67968e-36	-0.487206	0.158	0.333	1.0281e-31	1.18182	0.844117
FRAS1	9.12341e-31	-0.486157	0.036	0.123	2.54908e-26	0.57604	0.239061
MYADM	2.20371e-36	-0.484755	0.107	0.257	6.15717e-32	1.00541	0.669402
PBX1	4.36693e-28	-0.483907	0.145	0.287	1.22012e-23	1.17306	0.837641
CD9	3.77898e-36	-0.483566	0.113	0.266	1.05585e-31	0.998112	0.66293
AC025580.1	5.37369e-42	-0.481602	0.031	0.133	1.50141e-37	0.566129	0.232308
LIPG	1.39166e-20	-0.478987	0.055	0.134	3.88828e-16	0.667561	0.335552
AKAP12	9.1741e-09	-0.477733	0.08	0.135	0.000256324	0.943376	0.612237
TCF4	5.09255e-28	-0.47763	0.098	0.221	1.42286e-23	0.956849	0.625781
PLAU	9.94208e-30	-0.477239	0.026	0.102	2.77782e-25	0.599914	0.269118
ERRFI1	2.84299e-31	-0.475873	0.14	0.293	7.94331e-27	1.26837	0.938523
UTRN	3.84995e-19	-0.475366	0.299	0.45	1.07568e-14	1.77108	1.44158
APOL1	3.23359e-34	-0.472669	0.074	0.197	9.03465e-30	0.864246	0.536617
PLK2	1.99149e-29	-0.471812	0.037	0.122	5.56423e-25	0.581682	0.254647
MFSD2A	1.86444e-31	-0.470936	0.06	0.168	5.20924e-27	0.763168	0.436739
PLA2G12A	1.52725e-28	-0.47089	0.129	0.266	4.26714e-24	0.99468	0.668284
TMEM165	9.47141e-24	-0.47055	0.234	0.389	2.64631e-19	1.41763	1.09147
ITM2B	9.12288e-32	-0.470131	0.17	0.336	2.54893e-27	1.21147	0.885596
LIMS1	4.66544e-36	-0.469903	0.11	0.261	1.30352e-31	0.983958	0.658246
CFI	2.06343e-46	-0.468869	0.155	0.358	5.76521e-42	1.23336	0.908369
SMARCA1	8.14525e-33	-0.468419	0.098	0.235	2.27578e-28	0.930578	0.605895
CNTLN	1.05545e-38	-0.468194	0.087	0.229	2.94893e-34	0.875173	0.550646
REL	2.11785e-33	-0.464998	0.165	0.334	5.91728e-29	1.24159	0.919279
TUBA1A	7.54259e-20	-0.464435	0.046	0.119	2.1074e-15	0.653143	0.331221
CHD3	1.19426e-33	-0.464409	0.253	0.459	3.33677e-29	1.62587	1.30397
IL32	2.93265e-29	-0.463123	0.059	0.162	8.19381e-25	0.752786	0.431774
MET	5.50773e-29	-0.462584	0.14	0.285	1.53886e-24	1.12617	0.805534
PTPRM	2.99056e-37	-0.461605	0.173	0.361	8.35562e-33	1.27385	0.953894
SAMD4A	6.97089e-22	-0.461437	0.094	0.197	1.94767e-17	0.955959	0.636116
CALD1	3.0474e-14	-0.460528	0.234	0.35	8.51444e-10	1.70877	1.38955
RNF150	3.15899e-37	-0.460368	0.053	0.168	8.82622e-33	0.665077	0.345974
JUP	1.12934e-27	-0.4598	0.126	0.261	3.15536e-23	1.06532	0.746608
RCAN1	5.82848e-18	-0.459379	0.096	0.189	1.62848e-13	1.26415	0.945736
ASRGL1	1.39177e-31	-0.457249	0.322	0.531	3.8886e-27	2.00622	1.68928
IFRD1	5.28282e-33	-0.456557	0.14	0.296	1.47602e-28	1.07335	0.756893
BTBD3	1.28227e-38	-0.456131	0.114	0.273	3.58266e-34	0.965804	0.649638
PAPSS1	9.6486e-21	-0.455718	0.085	0.182	2.69582e-16	0.85891	0.54303
SPECC1	5.48316e-27	-0.452275	0.21	0.374	1.53199e-22	1.39974	1.08624
BMPR1B	1.99527e-40	-0.450875	0.045	0.159	5.57478e-36	0.603328	0.290805
TMEM101	2.79865e-32	-0.450573	0.216	0.406	7.81942e-28	1.64744	1.33513
RIMKLB	7.99882e-25	-0.4504	0.304	0.481	2.23487e-20	2.46638	2.15418
ELL2	6.67993e-31	-0.448591	0.102	0.236	1.86637e-26	0.995202	0.684262
LRFN5	3.36359e-26	-0.447471	0.061	0.158	9.39786e-22	0.728804	0.418641
DENND5A	1.85906e-32	-0.446727	0.045	0.144	5.19421e-28	0.627503	0.317856
RELA	6.11449e-32	-0.445933	0.059	0.167	1.70839e-27	0.684811	0.375714
ALCAM	4.24849e-23	-0.445622	0.116	0.235	1.18703e-18	0.993507	0.684625
AF117829.1	1.05794e-40	-0.445545	0.214	0.423	2.9559e-36	1.51994	1.21111
AHCYL1	1.30757e-29	-0.444782	0.184	0.349	3.65334e-25	1.24448	0.936181
SLC26A2	9.32301e-13	-0.44477	0.337	0.456	2.60485e-08	2.2706	1.96231
PPP1CB	1.48646e-23	-0.444218	0.211	0.359	4.15317e-19	1.36185	1.05395
NFKB2	1.92156e-39	-0.442878	0.111	0.273	5.36883e-35	1.03672	0.72974
SPRY3	2.80022e-52	-0.442782	0.036	0.158	7.82381e-48	0.515986	0.209073
INTS6	2.80812e-23	-0.441991	0.184	0.327	7.84588e-19	1.2461	0.939731
HES4	5.90437e-33	-0.441543	0.084	0.213	1.64968e-28	0.827724	0.52167
ATP1B3	1.92785e-32	-0.440116	0.103	0.24	5.38642e-28	0.947397	0.642332
PIP5K1A	2.66221e-34	-0.439169	0.099	0.239	7.43821e-30	0.856092	0.551683
ZFHX3	7.36047e-29	-0.437733	0.179	0.339	2.05652e-24	1.2761	0.972691
JARID2	2.68699e-31	-0.437497	0.088	0.215	7.50746e-27	0.85218	0.54893
HS6ST1	1.76998e-27	-0.436817	0.042	0.128	4.94533e-23	0.566993	0.264215
JUNB	4.32802e-30	-0.43641	0.144	0.296	1.20925e-25	1.15105	0.848556
QKI	8.72198e-34	-0.432769	0.098	0.236	2.43692e-29	0.897737	0.597765
COL12A1	9.06539e-22	-0.432096	0.078	0.174	2.53287e-17	0.854728	0.555222
POC1B	1.67928e-24	-0.432018	0.081	0.186	4.69191e-20	0.776286	0.476834
GCNT2	6.51858e-24	-0.431173	0.061	0.153	1.82129e-19	0.686671	0.387805
NABP1	7.30557e-25	-0.430801	0.257	0.431	2.04118e-20	1.69175	1.39315
CHMP1B	1.86105e-30	-0.429884	0.048	0.144	5.19978e-26	0.591494	0.293522
MAFK	4.87739e-27	-0.428445	0.102	0.226	1.36274e-22	0.952111	0.655135
TRPS1	4.68387e-34	-0.428232	0.119	0.271	1.30867e-29	1.0167	0.719868
AMD1	1.51779e-13	-0.428202	0.2	0.307	4.24072e-09	1.29906	1.00225
RAB11FIP1	9.1858e-13	-0.426302	0.237	0.34	2.56651e-08	1.50688	1.21139
DGKH	1.26898e-16	-0.42534	0.284	0.411	3.54554e-12	1.59064	1.29582
TCEAL9	6.06115e-38	-0.423719	0.054	0.171	1.69349e-33	0.651398	0.357698
DYRK3	2.6963e-45	-0.423599	0.038	0.154	7.53346e-41	0.57002	0.276403
CXCL2	1.15813e-24	-0.423588	0.129	0.256	3.23583e-20	1.51258	1.21897
USP43	5.36032e-28	-0.423231	0.157	0.307	1.49767e-23	1.17221	0.878848
PIM1	3.17828e-33	-0.421263	0.035	0.126	8.88011e-29	0.579181	0.287184
GATAD2B	2.40195e-36	-0.421159	0.078	0.211	6.71104e-32	0.760097	0.468171
NAMPT	1.20243e-16	-0.420407	0.185	0.299	3.35958e-12	1.43627	1.14487
ARHGEF12	3.21269e-16	-0.419236	0.265	0.401	8.97626e-12	1.56596	1.27537
VMP1	3.38554e-24	-0.41758	0.648	0.754	9.4592e-20	2.89735	2.60791
B4GALT1	1.69332e-30	-0.415519	0.054	0.156	4.73114e-26	0.629139	0.341124
COL6A2	1.66613e-12	-0.413405	0.089	0.161	4.65516e-08	0.904597	0.618047
PDGFB	2.42774e-19	-0.41295	0.065	0.147	6.78312e-15	0.875346	0.58911
JOSD1	2.12705e-32	-0.412668	0.116	0.261	5.94298e-28	0.939056	0.653016
AC008264.2	1.06104e-31	-0.411297	0.026	0.105	2.96454e-27	0.44412	0.159031
ABCA1	6.25789e-22	-0.411126	0.053	0.136	1.74845e-17	0.65901	0.374039
COL27A1	5.8479e-35	-0.411079	0.135	0.298	1.6339e-30	1.18425	0.89931
PLEKHG4B	9.79365e-28	-0.410718	0.067	0.172	2.73635e-23	0.717683	0.432995
GLI3	5.48064e-38	-0.410557	0.045	0.154	1.53129e-33	0.60398	0.319404
RNF180	7.43723e-36	-0.409934	0.086	0.223	2.07796e-31	0.794432	0.510288
TRIM17	7.46174e-60	-0.408821	0.015	0.12	2.08481e-55	0.380038	0.0966653
GSTP1	1.81904e-22	-0.408343	0.082	0.182	5.08241e-18	0.762262	0.47922
AC245297.3	2.24117e-23	-0.406163	0.17	0.307	6.26183e-19	1.13091	0.849379
ABCC1	1.73158e-27	-0.405873	0.049	0.14	4.83803e-23	0.592948	0.311619
PPP1R3B	9.42819e-30	-0.405573	0.055	0.156	2.63424e-25	0.637466	0.356344
ZFAND5	2.14209e-26	-0.404951	0.176	0.33	5.985e-22	1.22353	0.942836
SERPINA1	1.11212e-44	-0.403461	0.038	0.152	3.10726e-40	0.556016	0.276358
SWAP70	5.45329e-25	-0.403075	0.066	0.164	1.52365e-20	0.689982	0.410592
SGMS2	7.66664e-27	-0.402918	0.068	0.171	2.14206e-22	0.715196	0.435914
CD24	3.78956e-22	-0.402697	0.256	0.416	1.0588e-17	1.57241	1.29328
PNPLA3	4.33133e-42	-0.402607	0.02	0.108	1.21017e-37	0.4197	0.140634
LINC00621	4.68704e-31	-0.401478	0.028	0.108	1.30956e-26	0.451399	0.173115
SERINC5	1.0794e-18	-0.400286	0.24	0.381	3.01584e-14	1.43598	1.15853
RAB3GAP2	4.98359e-22	-0.399831	0.165	0.3	1.39241e-17	1.17023	0.893092
BHLHE40	3.65615e-25	-0.397994	0.114	0.239	1.02153e-20	1.03757	0.761702
TPBG	5.51972e-23	-0.397064	0.082	0.183	1.54221e-18	0.751314	0.47609
AL022068.1	7.00323e-37	-0.397017	0.027	0.115	1.9567e-32	0.447869	0.172677
IQCN	3.48692e-41	-0.396341	0.034	0.139	9.74246e-37	0.544721	0.269998
GALNT10	9.67083e-15	-0.396054	0.067	0.138	2.70203e-10	0.716974	0.44245
PLK3	2.69713e-16	-0.395264	0.069	0.145	7.53578e-12	0.710581	0.436605
S100A11	8.0632e-41	-0.394824	0.046	0.162	2.25286e-36	0.565406	0.291735
TRIM33	1.21397e-19	-0.392328	0.215	0.358	3.39183e-15	1.30473	1.03279
EFNA1	7.24472e-30	-0.391716	0.049	0.147	2.02418e-25	0.617322	0.345806
HSP90AB1	7.55061e-24	-0.391662	0.215	0.365	2.10964e-19	1.49191	1.22043
CACYBP	1.15595e-33	-0.391217	0.044	0.144	3.22974e-29	0.581184	0.310013
TNFRSF12A	1.06371e-33	-0.391024	0.069	0.19	2.97201e-29	0.695656	0.424619
SOX13	1.93171e-20	-0.390903	0.057	0.139	5.3972e-16	0.667842	0.396889
CENPJ	6.49478e-11	-0.3904	0.087	0.153	1.81464e-06	0.826726	0.556121
RAI14	2.36645e-19	-0.389112	0.151	0.268	6.61187e-15	1.14305	0.873334
BCL6	3.13116e-17	-0.388295	0.098	0.19	8.74847e-13	0.976748	0.707602
ADAM17	8.94429e-20	-0.388264	0.176	0.303	2.49904e-15	1.18659	0.917469
LAPTM4B	1.71241e-38	-0.38818	0.044	0.153	4.78446e-34	0.548854	0.279788
TRIM38	2.90041e-24	-0.38748	0.163	0.303	8.10374e-20	1.1477	0.879116
CDK16	5.68482e-20	-0.384713	0.071	0.159	1.58834e-15	0.690098	0.423436
DSP	3.60744e-14	-0.384692	0.213	0.329	1.00792e-09	1.45707	1.19042
PLEKHA5	8.73576e-21	-0.384576	0.263	0.42	2.44077e-16	1.53182	1.26525
UBC	1.24117e-27	-0.38367	0.244	0.422	3.46782e-23	1.72809	1.46215
AZIN1	2.96447e-30	-0.383516	0.063	0.172	8.28273e-26	0.638842	0.373009
POC1B-AS1	1.4173e-25	-0.383237	0.07	0.172	3.95994e-21	0.697723	0.432083
MIR222HG	2.11446e-17	-0.383202	0.065	0.142	5.90779e-13	0.760732	0.495117
MDM2	2.47586e-19	-0.382735	0.135	0.25	6.91756e-15	1.02549	0.760197
FAM126A	4.32857e-19	-0.381566	0.058	0.136	1.2094e-14	0.63757	0.373089
SPATA13	2.43168e-28	-0.381271	0.199	0.37	6.79411e-24	1.39116	1.12688
CSTB	1.38875e-26	-0.380688	0.052	0.145	3.88018e-22	0.637523	0.37365
HLA-E	4.34973e-29	-0.380424	0.185	0.35	1.21532e-24	1.25992	0.996227
SAMD11	3.50678e-32	-0.378478	0.04	0.133	9.79793e-28	0.559543	0.297202
FBXL2	3.47973e-30	-0.377097	0.045	0.139	9.72238e-26	0.524988	0.263604
MAP4K3	1.5263e-17	-0.37465	0.085	0.172	4.26449e-13	0.797654	0.537967
HMGXB3	3.02987e-07	-0.374338	0.218	0.293	0.00846547	1.31483	1.05536
ITPR1	8.23001e-26	-0.374066	0.048	0.137	2.29947e-21	0.633174	0.373891
FGFR2	9.56889e-18	-0.372879	0.114	0.215	2.67355e-13	0.937345	0.678885
STAT3	6.37841e-22	-0.37198	0.334	0.504	1.78213e-17	1.73455	1.47672
GCLC	8.76739e-21	-0.371524	0.053	0.133	2.44961e-16	0.622158	0.364637
TRIM11	3.37668e-38	-0.371486	0.099	0.251	9.43444e-34	0.864947	0.607452
MFGE8	7.24991e-26	-0.370832	0.085	0.197	2.02562e-21	0.805524	0.548483
TEAD1	5.64084e-28	-0.370765	0.21	0.385	1.57605e-23	1.36132	1.10432
AC004889.1	8.38349e-34	-0.370758	0.113	0.261	2.34235e-29	0.894035	0.637045
IER5	1.98644e-38	-0.369886	0.025	0.113	5.55011e-34	0.427587	0.171201
SLC5A3	3.45141e-11	-0.368054	0.178	0.271	9.64323e-07	1.18486	0.929747
PLEKHN1	5.58933e-19	-0.367961	0.054	0.13	1.56166e-14	0.667069	0.412018
IGFBP3	6.57172e-11	-0.367821	0.059	0.114	1.83614e-06	0.722659	0.467705
SLC39A6	1.09505e-37	-0.366313	0.033	0.13	3.05957e-33	0.464732	0.210823
DNAH14	1.58865e-24	-0.365847	0.161	0.306	4.4387e-20	1.1027	0.849109
SLC11A2	9.63149e-23	-0.365653	0.118	0.237	2.69104e-18	0.920951	0.667499
GPR132	9.81738e-38	-0.364758	0.02	0.101	2.74298e-33	0.40793	0.155099
FNDC3B	1.89261e-23	-0.364717	0.28	0.45	5.28795e-19	1.61035	1.35754
CEBPD	9.8584e-24	-0.363649	0.174	0.317	2.75444e-19	1.25725	1.00519
MDK	3.16915e-35	-0.362681	0.045	0.15	8.85461e-31	0.529456	0.278065
PPP1R10	2.58589e-23	-0.361242	0.157	0.294	7.22497e-19	1.08723	0.836837
DYNLT3	4.05807e-28	-0.360609	0.031	0.108	1.13382e-23	0.441526	0.191571
NEDD9	1.10849e-18	-0.360016	0.229	0.369	3.09711e-14	1.4927	1.24316
KCNK6	5.81243e-23	-0.358667	0.154	0.287	1.62399e-18	1.28011	1.0315
ARIH1	8.43815e-27	-0.358329	0.155	0.307	2.35762e-22	1.04754	0.799168
IGF1R	2.64197e-22	-0.358272	0.205	0.353	7.38166e-18	1.29651	1.04818
RGL3	2.86907e-31	-0.357993	0.133	0.286	8.01618e-27	1.03145	0.78331
DUSP8	1.20563e-31	-0.357813	0.033	0.12	3.36853e-27	0.490582	0.242565
PRSS22	5.09798e-26	-0.357706	0.041	0.124	1.42437e-21	0.502458	0.254515
LUC7L	4.20945e-14	-0.357518	0.331	0.473	1.17612e-09	1.742	1.49419
STX18	5.51008e-32	-0.357251	0.202	0.385	1.53952e-27	1.42356	1.17594
CEBPB	1.52745e-20	-0.357225	0.095	0.198	4.26768e-16	0.800964	0.553355
LINC00665	2.06578e-22	-0.356887	0.119	0.237	5.77179e-18	0.908249	0.660874
RPS3	4.15553e-20	-0.355836	0.102	0.206	1.16106e-15	0.858129	0.611482
NECTIN2	1.97782e-21	-0.35558	0.056	0.14	5.52602e-17	0.604909	0.358439
TJP1	3.84802e-24	-0.354494	0.183	0.331	1.07514e-19	1.21071	0.964997
COL4A1	1.38657e-17	-0.354186	0.137	0.245	3.87408e-13	1.22225	0.976749
PTMA	9.72383e-18	-0.354136	0.363	0.523	2.71684e-13	1.91902	1.67356
GBP2	1.87969e-15	-0.353449	0.049	0.114	5.25185e-11	0.581132	0.33614
PKD2	1.55102e-17	-0.353287	0.08	0.166	4.33355e-13	0.720173	0.475293
CELSR1	2.78199e-26	-0.352202	0.054	0.147	7.77289e-22	0.611288	0.36716
AP1S3	1.25822e-13	-0.351814	0.05	0.11	3.51546e-09	0.554174	0.310316
CD200	4.24232e-20	-0.351607	0.058	0.139	1.1853e-15	0.603304	0.359589
TSHZ2	1.5504e-16	-0.35103	0.149	0.257	4.33181e-12	1.16852	0.925205
TACSTD2	6.67322e-32	-0.350192	0.035	0.123	1.8645e-27	0.446416	0.203681
GNAI2	1.13445e-23	-0.349939	0.062	0.154	3.16965e-19	0.653805	0.411246
DLC1	3.17879e-24	-0.347406	0.04	0.119	8.88154e-20	0.5656	0.324796
MIA2	6.64867e-10	-0.347295	0.183	0.271	1.85764e-05	1.23714	0.99641
DCDC2	2.56591e-30	-0.347216	0.213	0.399	7.16916e-26	1.51384	1.27317
ZNF331	9.54467e-14	-0.346798	0.068	0.136	2.66678e-09	0.728169	0.487788
ABCG1	1.18089e-13	-0.345772	0.055	0.117	3.29941e-09	0.616406	0.376735
ITGA3	1.40371e-07	-0.345479	0.192	0.264	0.00392198	1.32353	1.08406
IER2	1.02053e-30	-0.344886	0.165	0.332	2.85137e-26	1.28231	1.04326
RPL11	3.92357e-17	-0.34453	0.185	0.308	1.09624e-12	1.18529	0.946477
IL4R	2.1469e-17	-0.34406	0.129	0.236	5.99845e-13	1.03648	0.797993
ARID4B	2.94441e-17	-0.343977	0.271	0.416	8.22668e-13	1.50976	1.27133
TOB2	2.00423e-27	-0.343849	0.075	0.185	5.59981e-23	0.746373	0.508035
JPT2	1.88524e-20	-0.343495	0.082	0.177	5.26735e-16	0.700423	0.46233
MAP2K3	8.22662e-26	-0.343351	0.118	0.246	2.29852e-21	1.02934	0.791346
DUSP4	2.40011e-15	-0.342219	0.072	0.147	6.70591e-11	0.787555	0.550347
CHD2	3.32671e-15	-0.34202	0.377	0.521	9.29484e-11	1.86342	1.62635
KCNC3	5.74703e-24	-0.341995	0.129	0.257	1.60572e-19	1.06269	0.825633
RDH13	2.17644e-25	-0.341943	0.136	0.275	6.08097e-21	1.00125	0.764233
UBE2D2	2.24487e-19	-0.341604	0.166	0.29	6.27217e-15	1.05701	0.820224
KDM5B	3.38083e-19	-0.341184	0.259	0.409	9.44604e-15	1.46692	1.23043
ELK3	8.66489e-15	-0.341094	0.081	0.158	2.42097e-10	0.810446	0.574018
KCNK1	1.19141e-34	-0.339916	0.082	0.214	3.3288e-30	0.733714	0.498102
INTS3	9.51784e-24	-0.339899	0.21	0.367	2.65928e-19	1.33638	1.10078
NUP98	4.11967e-17	-0.337999	0.12	0.223	1.15104e-12	0.910986	0.676703
ADAM9	2.616e-24	-0.337929	0.1	0.215	7.30912e-20	0.824201	0.589966
C1QTNF6	1.07707e-20	-0.337594	0.037	0.106	3.00933e-16	0.485835	0.251833
TAGLN2	1.7873e-30	-0.337404	0.087	0.212	4.99372e-26	0.764447	0.530577
NECTIN4	1.64569e-29	-0.336704	0.026	0.102	4.59806e-25	0.420799	0.187414
AP002026.1	8.41811e-28	-0.33647	0.034	0.115	2.35202e-23	0.462275	0.229051
ZMIZ2	5.73738e-14	-0.335522	0.164	0.268	1.60302e-09	1.15801	0.925447
SMS	1.01039e-12	-0.334724	0.052	0.11	2.82303e-08	0.558238	0.326225
TRIB1	1.87663e-17	-0.333595	0.049	0.118	5.24331e-13	0.58623	0.354999
TULP4	1.03211e-23	-0.332329	0.163	0.305	2.8837e-19	1.05474	0.824384
SIRT1	5.15975e-15	-0.330944	0.066	0.138	1.44163e-10	0.650862	0.421469
TES	1.79753e-17	-0.330488	0.114	0.215	5.0223e-13	0.859758	0.630682
ARAP2	2.07812e-19	-0.329922	0.183	0.314	5.80628e-15	1.21333	0.984643
KMT2C	2.97877e-17	-0.329018	0.404	0.566	8.32267e-13	1.95494	1.72689
TCP1	1.52699e-22	-0.328491	0.071	0.166	4.2664e-18	0.641697	0.414004
CTSH	1.18743e-19	-0.328366	0.042	0.112	3.31767e-15	0.544845	0.31724
MIDN	3.87458e-18	-0.327089	0.23	0.376	1.08256e-13	1.48398	1.25726
NFKB1	2.76675e-13	-0.326795	0.112	0.195	7.73029e-09	0.962113	0.735596
CD46	9.31237e-14	-0.326532	0.423	0.545	2.60188e-09	1.92969	1.70335
ACTG1	1.19924e-17	-0.326393	0.237	0.377	3.35067e-13	1.43357	1.20733
MARK1	6.06551e-29	-0.326166	0.074	0.187	1.6947e-24	0.712386	0.486305
UBE2D3	1.17789e-16	-0.325611	0.3	0.444	3.29101e-12	1.55492	1.32922
DANT2	7.18549e-27	-0.324789	0.099	0.223	2.00763e-22	0.800284	0.575157
SDCBP	4.41567e-21	-0.324137	0.071	0.162	1.23374e-16	0.676769	0.452094
CTNNA1	7.63129e-14	-0.324025	0.174	0.282	2.13218e-09	1.12593	0.901336
NPC1	1.17376e-18	-0.3238	0.07	0.154	3.27949e-14	0.649148	0.424707
ANXA11	5.68535e-17	-0.323612	0.272	0.413	1.58849e-12	1.57267	1.34836
HSPA5	1.35463e-23	-0.323599	0.082	0.187	3.78483e-19	0.761573	0.537272
ZNF611	1.2859e-21	-0.323542	0.121	0.239	3.5928e-17	0.968878	0.744616
CCDC40	7.21325e-19	-0.323339	0.061	0.14	2.01538e-14	0.615319	0.391198
SLC25A44	9.83909e-18	-0.323007	0.044	0.111	2.74904e-13	0.585341	0.361449
HSD17B7	2.49804e-25	-0.322202	0.067	0.168	6.97953e-21	0.642533	0.419199
IRGQ	1.62741e-29	-0.321544	0.036	0.122	4.54699e-25	0.440125	0.217248
SLC7A5	2.91642e-25	-0.32137	0.032	0.107	8.14847e-21	0.458403	0.235646
MUC1	1.71937e-16	-0.320274	0.293	0.436	4.80392e-12	1.61605	1.39406
AC026356.2	8.04865e-21	-0.319374	0.095	0.199	2.24879e-16	0.768632	0.547259
FOXO3	4.66472e-15	-0.319045	0.112	0.205	1.30332e-10	0.896452	0.675306
ETS1	2.43955e-21	-0.318026	0.11	0.222	6.81611e-17	0.936757	0.716318
RNASET2	2.92873e-23	-0.317935	0.269	0.444	8.18287e-19	1.61941	1.39903
YOD1	8.12494e-24	-0.316044	0.036	0.111	2.27011e-19	0.434923	0.215858
KLF5	3.70094e-10	-0.315195	0.253	0.352	1.03404e-05	1.45586	1.23739
DUSP3	4.02773e-26	-0.314386	0.048	0.137	1.12535e-21	0.522326	0.304411
CYTH2	1.33311e-17	-0.314252	0.109	0.207	3.7247e-13	0.842569	0.624746
CHD1	3.71396e-11	-0.314239	0.32	0.44	1.03768e-06	1.64918	1.43136
HELB	1.09215e-20	-0.314192	0.063	0.15	3.05146e-16	0.611934	0.394153
ITGAV	7.49102e-15	-0.314084	0.145	0.246	2.09299e-10	1.01896	0.801256
ASPH	6.96069e-09	-0.314055	0.214	0.3	0.000194482	1.29291	1.07522
VCAN	1.36105e-16	-0.313675	0.16	0.275	3.80276e-12	1.23232	1.0149
UBN2	7.66035e-15	-0.313556	0.208	0.329	2.1403e-10	1.26264	1.0453
CD47	3.91643e-19	-0.312603	0.244	0.392	1.09425e-14	1.41731	1.20063
ASAP1	1.59704e-21	-0.312145	0.076	0.172	4.46214e-17	0.667575	0.451213
SMURF2	1.24618e-17	-0.31207	0.112	0.213	3.48181e-13	0.862503	0.646193
ACOT9	1.11735e-12	-0.312051	0.088	0.162	3.12187e-08	0.734405	0.518107
JMJD1C	1.1174e-14	-0.311666	0.296	0.434	3.12202e-10	1.58874	1.37271
MORF4L2	3.02451e-18	-0.311383	0.093	0.188	8.45048e-14	0.765364	0.54953
IER5L	1.6845e-17	-0.31021	0.073	0.156	4.7065e-13	0.726921	0.5119
KDM2A	1.50158e-16	-0.310174	0.248	0.386	4.19542e-12	1.384	1.169
PLEC	4.7172e-14	-0.30877	0.195	0.305	1.31799e-09	1.44593	1.23191
SARAF	1.67606e-15	-0.30871	0.062	0.134	4.68292e-11	0.600873	0.386892
CNN3	2.54571e-19	-0.307328	0.057	0.137	7.11272e-15	0.586914	0.373891
TMEM189	3.2172e-21	-0.305959	0.042	0.115	8.98885e-17	0.482076	0.270001
AC008760.2	4.30613e-24	-0.305871	0.041	0.121	1.20313e-19	0.536793	0.324779
IFI27	6.25144e-20	-0.305856	0.063	0.147	1.74665e-15	0.578767	0.366764
PMEPA1	2.77078e-24	-0.304797	0.109	0.23	7.74156e-20	0.932491	0.721222
SPIN1	1.1148e-19	-0.304618	0.108	0.215	3.11475e-15	0.788147	0.577002
LPCAT1	2.07954e-17	-0.304356	0.038	0.101	5.81024e-13	0.462996	0.252032
DLX6-AS1	1.57707e-20	-0.304099	0.087	0.185	4.40635e-16	0.783038	0.572253
CDC73	1.23018e-16	-0.302821	0.088	0.176	3.43713e-12	0.718973	0.509074
CEP170	1.69994e-21	-0.302809	0.056	0.14	4.74964e-17	0.570427	0.360536
MSI2	1.80133e-17	-0.302759	0.273	0.422	5.03291e-13	1.47351	1.26366
PHACTR4	9.37184e-15	-0.301496	0.26	0.389	2.61849e-10	1.48002	1.27104
POU5F1	1.58384e-26	-0.301278	0.106	0.233	4.42526e-22	0.899464	0.690635
FAM53C	1.90071e-21	-0.301234	0.043	0.119	5.31058e-17	0.48497	0.27617
ETS2	2.99188e-19	-0.301088	0.224	0.371	8.35931e-15	1.37533	1.16663
H3F3A	2.05798e-18	-0.300865	0.131	0.24	5.75e-14	0.895111	0.686567
LYPLA1	1.29534e-17	-0.300149	0.081	0.168	3.61918e-13	0.617297	0.409249
UBE2Z	2.72501e-20	-0.299496	0.114	0.225	7.61369e-16	0.81272	0.605125
CD59	3.70352e-19	-0.299458	0.074	0.162	1.03476e-14	0.697748	0.490179
TRIM8	3.60261e-12	-0.299429	0.113	0.194	1.00657e-07	0.857367	0.649819
KIZ	9.37177e-25	-0.299193	0.127	0.26	2.61847e-20	0.986643	0.779258
SFT2D2	5.08156e-18	-0.298572	0.141	0.254	1.41979e-13	0.90811	0.701156
PEA15	1.07257e-28	-0.298038	0.029	0.107	2.99675e-24	0.387425	0.180841
EPN2	1.96101e-19	-0.297829	0.223	0.372	5.47905e-15	1.3027	1.09626
TANC2	8.22648e-15	-0.297441	0.113	0.205	2.29848e-10	0.856396	0.650226
GDF11	2.72431e-13	-0.29675	0.057	0.12	7.61172e-09	0.553363	0.347671
C16orf72	1.05847e-21	-0.296725	0.062	0.15	2.95737e-17	0.577488	0.371815
USP54	1.31554e-07	-0.296705	0.091	0.144	0.00367562	0.785961	0.580301
AIG1	2.68183e-22	-0.295275	0.1	0.211	7.49304e-18	0.773758	0.569089
DDX3X	2.45749e-14	-0.294533	0.305	0.441	6.86623e-10	1.58613	1.38198
LAMB3	6.5596e-14	-0.293507	0.135	0.227	1.83275e-09	1.34479	1.14135
CYBC1	1.6827e-09	-0.290264	0.069	0.124	4.70147e-05	0.633841	0.432645
COL18A1	6.99285e-22	-0.290125	0.178	0.321	1.9538e-17	1.24042	1.03932
SESN3	2.15698e-15	-0.29011	0.061	0.132	6.02661e-11	0.62647	0.425381
FGFR1	1.06279e-17	-0.289375	0.151	0.268	2.96944e-13	1.12121	0.920634
SOCS3	7.86024e-22	-0.289295	0.087	0.192	2.19615e-17	0.760669	0.560145
AC136475.3	1.05931e-25	-0.28872	0.096	0.216	2.95972e-21	0.856737	0.656611
GNL1	3.04414e-14	-0.288571	0.064	0.133	8.50532e-10	0.61066	0.410638
BCL3	3.78016e-16	-0.287437	0.061	0.135	1.05618e-11	0.593579	0.394344
ATP2A2	1.81293e-09	-0.287273	0.26	0.362	5.06534e-05	1.4342	1.23508
IL1R1	1.56631e-23	-0.287196	0.221	0.386	4.37628e-19	1.46271	1.26364
CLCN5	4.45858e-14	-0.287099	0.053	0.116	1.24573e-09	0.549014	0.350012
HACD2	1.4936e-24	-0.286429	0.039	0.117	4.17311e-20	0.433548	0.235011
FKBP4	3.0059e-28	-0.286425	0.042	0.131	8.39849e-24	0.516064	0.317529
PRKAA2	4.81125e-19	-0.28614	0.072	0.158	1.34426e-14	0.597298	0.398961
ARF1	1.08545e-23	-0.284845	0.064	0.16	3.03275e-19	0.609197	0.411757
TMCC1	9.34772e-18	-0.284655	0.082	0.172	2.61175e-13	0.650191	0.452883
ARFGAP1	2.85826e-08	-0.284594	0.091	0.148	0.000798599	0.793769	0.596503
DDX5	3.32609e-08	-0.28452	0.685	0.787	0.000929308	2.76147	2.56426
UBR4	1.38213e-11	-0.283203	0.167	0.261	3.86167e-07	1.10993	0.913626
SEMA4B	1.51478e-15	-0.282518	0.044	0.106	4.23231e-11	0.490227	0.2944
EFHD2	1.30656e-15	-0.282471	0.054	0.121	3.65054e-11	0.56169	0.365896
C20orf194	1.10429e-13	-0.28199	0.063	0.13	3.08538e-09	0.61057	0.415109
ACTB	6.56308e-12	-0.281822	0.269	0.387	1.83373e-07	1.5165	1.32115
ZNF532	1.22245e-21	-0.281609	0.061	0.148	3.41553e-17	0.606714	0.411517
AC005261.1	3.93909e-21	-0.280724	0.126	0.246	1.10058e-16	0.892493	0.69791
ARHGEF5	8.32614e-20	-0.279112	0.13	0.247	2.32632e-15	0.972625	0.77916
FAM107B	8.7113e-18	-0.278932	0.078	0.166	2.43394e-13	0.694533	0.501192
HLA-DRA	4.77303e-09	-0.278541	0.061	0.112	0.000133358	0.596089	0.40302
CSNK1G1	1.20837e-16	-0.277536	0.079	0.163	3.37619e-12	0.649475	0.457102
CSF1	2.83229e-16	-0.27734	0.071	0.15	7.91341e-12	0.772906	0.580669
LAMC1	3.30534e-23	-0.277057	0.094	0.205	9.23513e-19	0.765134	0.573092
NCALD	3.49258e-22	-0.276625	0.04	0.115	9.75826e-18	0.495406	0.303664
SPATS2	1.48961e-09	-0.276368	0.105	0.172	4.16198e-05	0.778003	0.586439
TIPARP	1.72261e-16	-0.275806	0.051	0.12	4.81297e-12	0.545269	0.354096
MNT	8.90116e-14	-0.275686	0.104	0.187	2.48698e-09	0.844697	0.653607
CTC1	9.53521e-12	-0.27546	0.064	0.126	2.66414e-07	0.62125	0.430315
L3MBTL3	2.97292e-12	-0.275247	0.082	0.153	8.30635e-08	0.745699	0.554912
VPS37B	1.38541e-13	-0.274404	0.163	0.268	3.87084e-09	1.08849	0.898292
WDR26	1.21136e-17	-0.274401	0.113	0.216	3.38455e-13	0.773186	0.582986
AC092828.1	6.58693e-15	-0.273859	0.051	0.115	1.84039e-10	0.470902	0.281077
GLIS3	2.00512e-18	-0.273546	0.189	0.324	5.6023e-14	1.23222	1.04262
RPLP1	9.04998e-13	-0.273379	0.191	0.302	2.52857e-08	1.19925	1.00975
SLC7A1	1.67088e-19	-0.272767	0.102	0.206	4.66844e-15	0.787794	0.598726
HIPK2	1.53001e-19	-0.270384	0.115	0.224	4.27485e-15	0.859984	0.672568
IDI1	3.2163e-20	-0.270296	0.036	0.103	8.98633e-16	0.437573	0.250218
TRNAU1AP	5.37071e-13	-0.269996	0.097	0.174	1.50058e-08	0.731385	0.544238
RHOB	3.07528e-23	-0.269483	0.069	0.165	8.59232e-19	0.626311	0.43952
IL6R	6.6253e-16	-0.269349	0.079	0.16	1.85111e-11	0.715388	0.528689
COL4A2	8.30095e-22	-0.269295	0.138	0.266	2.31929e-17	1.12539	0.938724
LPIN1	9.83496e-10	-0.268723	0.122	0.194	2.74789e-05	0.923843	0.737578
HOOK3	6.09692e-11	-0.268168	0.234	0.345	1.70348e-06	1.34612	1.16024
EPAS1	9.54332e-15	-0.268086	0.077	0.154	2.6664e-10	0.689878	0.504055
SNAP23	1.89632e-21	-0.26805	0.074	0.17	5.29831e-17	0.616625	0.430827
CLCF1	7.73713e-14	-0.268048	0.062	0.129	2.16175e-09	0.585928	0.400131
TPM2	6.88092e-13	-0.267757	0.071	0.14	1.92253e-08	0.718512	0.532916
EYA2	2.98138e-29	-0.267419	0.079	0.197	8.32999e-25	0.69413	0.50877
C6orf132	7.53987e-10	-0.267414	0.14	0.218	2.10664e-05	1.07062	0.885263
CCDC88A	3.59008e-13	-0.266963	0.073	0.143	1.00307e-08	0.693737	0.508692
MIR22HG	4.8004e-11	-0.266393	0.08	0.145	1.34123e-06	0.67977	0.49512
KRT7	2.80173e-17	-0.265744	0.115	0.215	7.82804e-13	0.955373	0.771174
SLC2A1	4.31132e-21	-0.265721	0.038	0.108	1.20458e-16	0.452973	0.26879
UBA1	1.92011e-18	-0.265415	0.076	0.164	5.36479e-14	0.659828	0.475856
PPP2CA	7.19087e-15	-0.264128	0.047	0.109	2.00913e-10	0.481652	0.298572
RC3H1	7.82077e-13	-0.263949	0.184	0.292	2.18512e-08	1.12475	0.941792
EPOR	2.53069e-18	-0.263708	0.061	0.14	7.07074e-14	0.579288	0.396499
CDV3	4.25092e-15	-0.263651	0.113	0.206	1.18771e-10	0.815399	0.63265
GTF2IRD1	6.22411e-17	-0.262992	0.052	0.123	1.73902e-12	0.534791	0.352499
YWHAG	1.08139e-19	-0.261952	0.043	0.114	3.02141e-15	0.441679	0.260108
GADD45A	3.5534e-10	-0.261222	0.111	0.183	9.92821e-06	0.947444	0.766379
BACE2	6.10966e-19	-0.260608	0.054	0.13	1.70704e-14	0.553584	0.372944
PIK3C2A	1.00157e-13	-0.260574	0.208	0.328	2.7984e-09	1.19361	1.01299
EGR1	3.8814e-19	-0.26055	0.19	0.324	1.08446e-14	1.37969	1.19909
STK17A	1.39806e-12	-0.259506	0.134	0.222	3.90618e-08	0.987697	0.807821
LINC00511	9.46612e-07	-0.259488	0.139	0.2	0.0264483	1.01551	0.835652
PITPNM1	7.30465e-15	-0.259289	0.054	0.12	2.04092e-10	0.546153	0.366427
CTBP2	3.28443e-11	-0.259081	0.301	0.424	9.17669e-07	1.57886	1.39927
LINC01764	6.81034e-25	-0.258504	0.034	0.11	1.90281e-20	0.378803	0.199622
NUFIP2	1.16782e-13	-0.257912	0.235	0.356	3.26288e-09	1.24476	1.06599
ZBTB21	1.77947e-24	-0.257089	0.05	0.137	4.97185e-20	0.509699	0.331499
RALGDS	3.78575e-11	-0.257047	0.226	0.332	1.05774e-06	1.40994	1.23177
SAV1	4.3831e-17	-0.257021	0.042	0.107	1.22464e-12	0.423558	0.245405
UBXN7	2.69765e-16	-0.256889	0.083	0.169	7.53725e-12	0.66664	0.488578
TNFAIP1	2.76239e-20	-0.256789	0.054	0.133	7.71813e-16	0.495706	0.317713
BICD1	1.21914e-24	-0.25638	0.257	0.439	3.40629e-20	1.68272	1.50501
RNF19A	2.19303e-13	-0.256035	0.266	0.397	6.12733e-09	1.47194	1.29447
TRAF4	6.35271e-14	-0.255697	0.097	0.18	1.77495e-09	0.764094	0.586859
RYBP	1.25723e-16	-0.255221	0.047	0.113	3.51271e-12	0.447212	0.270306
SEPTIN9	1.15047e-24	-0.254868	0.094	0.21	3.21441e-20	0.750281	0.57362
FMNL2	3.57815e-11	-0.254264	0.08	0.146	9.99735e-07	0.709079	0.532836
SEMA4C	1.66489e-16	-0.253507	0.04	0.102	4.6517e-12	0.454511	0.278793
PARP14	4.40295e-15	-0.252859	0.326	0.479	1.23018e-10	1.77911	1.60384
RPS26	3.9407e-14	-0.252853	0.093	0.175	1.10103e-09	0.712288	0.537024
HMBOX1	6.10967e-19	-0.252838	0.106	0.211	1.70704e-14	0.746444	0.57119
SLC50A1	3.20085e-18	-0.252822	0.053	0.128	8.94318e-14	0.516059	0.340817
YBX3	9.07128e-12	-0.252629	0.364	0.496	2.53452e-07	1.79611	1.621
HLA-A	2.83585e-16	-0.252514	0.177	0.299	7.92337e-12	1.10748	0.93245
AL512274.1	3.84779e-12	-0.252287	0.051	0.108	1.07507e-07	0.536003	0.361131
ODF2	1.076e-11	-0.251721	0.05	0.105	3.00633e-07	0.525846	0.351366
SNX9	2.43853e-14	-0.25105	0.13	0.225	6.81324e-10	0.915865	0.741851
PLEKHG1	2.4682e-16	-0.250952	0.074	0.155	6.89615e-12	0.651986	0.478039
BCAR3	1.52497e-23	-0.250702	0.037	0.112	4.26075e-19	0.44917	0.275397
AGO2	2.90083e-14	-0.250627	0.278	0.414	8.10492e-10	1.50953	1.33581
RDX	2.65081e-15	-0.250556	0.087	0.171	7.40636e-11	0.704537	0.530865
SUN1	1.01536e-11	-0.250455	0.289	0.416	2.83691e-07	1.49588	1.32228
TNFSF14	6.35225e-18	-0.250209	0.05	0.122	1.77482e-13	0.644726	0.471294
TXNRD1	2.16195e-16	-0.250131	0.081	0.165	6.04049e-12	0.716524	0.543147
AC011379.1	3.31621e-20	-0.249928	0.034	0.101	9.26548e-16	0.383307	0.21007
PTP4A2	7.97899e-16	-0.24978	0.17	0.285	2.22933e-11	1.03845	0.865318
ULK1	1.21524e-14	-0.249201	0.105	0.193	3.39537e-10	0.847091	0.674358
P4HA1	5.80103e-15	-0.248441	0.044	0.105	1.62081e-10	0.480223	0.308017
CSNK1D	3.15365e-09	-0.248269	0.199	0.292	8.81129e-05	1.17811	1.00602
RBM14	4.28332e-09	-0.24808	0.076	0.133	0.000119676	0.63949	0.467534
KMT5C	2.45114e-18	-0.247978	0.064	0.145	6.84848e-14	0.590274	0.41839
AGPAT4	7.30221e-17	-0.247421	0.06	0.136	2.04024e-12	0.61596	0.444461
HRH1	3.58474e-20	-0.24667	0.111	0.222	1.00158e-15	0.909468	0.73849
LTBP4	2.00642e-16	-0.24638	0.113	0.211	5.60595e-12	0.838887	0.668109
CCN1	2.64819e-18	-0.245923	0.139	0.256	7.39904e-14	1.16836	0.997903
MPDZ	9.08757e-15	-0.245843	0.052	0.117	2.53907e-10	0.505744	0.335338
LINC01480	3.12674e-22	-0.245416	0.037	0.109	8.73612e-18	0.461266	0.291157
MXD1	2.41402e-13	-0.24528	0.064	0.13	6.74477e-09	0.603417	0.433402
SEC14L1	1.98964e-12	-0.245276	0.098	0.176	5.55907e-08	0.762324	0.592311
DCAF8	4.3351e-15	-0.245233	0.14	0.245	1.21123e-10	0.921087	0.751105
ARHGAP17	3.95432e-09	-0.244875	0.104	0.17	0.000110484	0.780889	0.611154
CBL	8.80209e-14	-0.244441	0.066	0.134	2.4593e-09	0.559393	0.389959
GNB1	9.27318e-13	-0.244357	0.12	0.208	2.59093e-08	0.79136	0.621985
CCN2	1.04101e-09	-0.244057	0.098	0.165	2.90859e-05	0.861987	0.69282
PREX2	1.89857e-17	-0.243926	0.102	0.199	5.30462e-13	0.786184	0.617108
FOXO1	4.64475e-14	-0.242696	0.117	0.207	1.29774e-09	0.851608	0.683384
TMEM123	4.40347e-18	-0.242663	0.071	0.155	1.23033e-13	0.569753	0.401552
SQLE	2.79849e-15	-0.242499	0.069	0.144	7.81899e-11	0.600276	0.432188
EIF1AX	3.60506e-13	-0.24246	0.139	0.234	1.00726e-08	0.94662	0.77856
CAPS	3.22835e-11	-0.240628	0.062	0.121	9.02e-07	0.601021	0.43423
AR	3.30834e-25	-0.239841	0.048	0.137	9.24349e-21	0.51677	0.350525
TOR1AIP2	2.89601e-20	-0.239613	0.116	0.23	8.09144e-16	0.795973	0.629886
SLC3A2	2.41857e-20	-0.238473	0.058	0.141	6.75749e-16	0.537416	0.372119
TMEM184B	8.00997e-15	-0.238192	0.062	0.133	2.23799e-10	0.545447	0.380345
EHMT1	1.37985e-10	-0.237869	0.19	0.287	3.85531e-06	1.16161	0.996737
CREM	1.40977e-17	-0.237395	0.053	0.126	3.93889e-13	0.515839	0.351289
PRMT2	1.2705e-14	-0.237312	0.233	0.363	3.54979e-10	1.3086	1.1441
MAP3K8	1.44248e-25	-0.237306	0.057	0.153	4.03029e-21	0.553642	0.389154
VWA8	3.53452e-19	-0.236411	0.079	0.171	9.87545e-15	0.659985	0.496117
LINC00923	5.14949e-30	-0.236388	0.038	0.128	1.43877e-25	0.433713	0.269861
FZD3	6.5567e-23	-0.23553	0.038	0.113	1.83194e-18	0.379296	0.216038
SLC20A1	6.07532e-09	-0.235185	0.119	0.187	0.000169744	0.894816	0.731798
RNF217	1.21799e-14	-0.234936	0.058	0.126	3.40308e-10	0.509441	0.346596
FERMT2	1.3396e-16	-0.234833	0.083	0.168	3.74285e-12	0.682972	0.520198
ELP2	1.77627e-14	-0.234822	0.149	0.254	4.9629e-10	0.917678	0.754911
AC108519.1	1.5398e-20	-0.234725	0.055	0.137	4.30219e-16	0.508179	0.34548
NDEL1	5.82405e-16	-0.234166	0.125	0.226	1.62724e-11	0.853388	0.691077
TENT5A	1.37013e-14	-0.234049	0.067	0.14	3.82814e-10	0.624545	0.462314
BAZ2B	2.84109e-09	-0.233682	0.398	0.521	7.938e-05	1.87675	1.71477
MIR34AHG	1.87488e-13	-0.233215	0.048	0.107	5.23842e-09	0.477513	0.315861
HNRNPA2B1	5.35017e-13	-0.232802	0.696	0.781	1.49484e-08	2.68564	2.52427
WWC2	3.73701e-20	-0.232613	0.069	0.158	1.04412e-15	0.599578	0.438342
ACP6	4.51748e-22	-0.232586	0.054	0.139	1.26218e-17	0.507264	0.346047
UBA6	3.28018e-15	-0.232087	0.213	0.339	9.16482e-11	1.19765	1.03678
FNDC3A	5.58319e-10	-0.232027	0.208	0.307	1.55994e-05	1.19043	1.0296
PFN1	1.17553e-08	-0.230566	0.072	0.126	0.000328443	0.591175	0.431359
ANK2	2.89956e-09	-0.230296	0.074	0.13	8.10136e-05	0.772699	0.61307
TRIM22	2.13904e-17	-0.230179	0.075	0.16	5.97649e-13	0.606251	0.446703
POGZ	1.27608e-14	-0.230113	0.258	0.394	3.56538e-10	1.37888	1.21937
RAB3IP	6.12791e-13	-0.229993	0.191	0.3	1.71214e-08	1.13324	0.973817
MACF1	8.10568e-10	-0.229358	0.474	0.601	2.26473e-05	2.14647	1.98749
ITPR3	8.43197e-08	-0.22926	0.146	0.215	0.00235589	0.99194	0.833029
RAB27A	5.8381e-14	-0.229239	0.045	0.105	1.63116e-09	0.454961	0.296065
PITPNA	1.17762e-10	-0.229125	0.054	0.108	3.29028e-06	0.516821	0.358004
FXR1	6.38412e-12	-0.229096	0.143	0.233	1.78372e-07	0.918347	0.75955
R3HDM4	4.84107e-13	-0.228673	0.05	0.108	1.35259e-08	0.501116	0.342612
MAPKAPK2	2.97551e-17	-0.228604	0.053	0.126	8.31358e-13	0.506588	0.348132
TMEM41B	8.52072e-13	-0.228052	0.086	0.161	2.38069e-08	0.629297	0.471223
FAM227A	2.64696e-16	-0.227949	0.063	0.138	7.39561e-12	0.560748	0.402746
LAMP2	5.69652e-19	-0.227598	0.063	0.145	1.59161e-14	0.539455	0.381696
FAM189A2	1.12687e-20	-0.227577	0.111	0.224	3.14848e-16	0.941235	0.78349
CORO1C	1.8342e-16	-0.227342	0.06	0.134	5.12474e-12	0.562758	0.405176
PLEKHA8	3.21582e-14	-0.226946	0.067	0.138	8.98501e-10	0.547027	0.389721
YAP1	5.25002e-18	-0.226743	0.095	0.192	1.46686e-13	0.695104	0.537938
PERP	1.76078e-15	-0.226114	0.046	0.109	4.91961e-11	0.4377	0.28097
ANKLE2	8.41059e-10	-0.225545	0.399	0.514	2.34992e-05	1.91557	1.75923
SPINT2	1.1757e-20	-0.22524	0.108	0.219	3.28491e-16	0.757081	0.600956
COPA	1.84532e-18	-0.224927	0.195	0.333	5.15582e-14	1.13344	0.977533
PTOV1	2.06515e-10	-0.224872	0.106	0.179	5.77003e-06	0.775645	0.619776
CRIP2	2.77661e-16	-0.224868	0.108	0.204	7.75784e-12	0.82584	0.669973
FARP1	1.46664e-14	-0.223905	0.322	0.473	4.09779e-10	1.64059	1.4854
RBMS1	2.76977e-13	-0.223353	0.122	0.214	7.73875e-09	0.883778	0.728961
RHOQ	5.11218e-14	-0.222873	0.085	0.163	1.42834e-09	0.667387	0.512903
TMSB4X	6.36828e-11	-0.221351	0.12	0.2	1.7793e-06	0.869455	0.716027
ZNF217	2.76636e-08	-0.220965	0.104	0.165	0.000772922	0.790846	0.637685
ARHGEF11	6.59083e-20	-0.220597	0.073	0.165	1.84148e-15	0.589881	0.436975
ANK3	1.78565e-15	-0.21978	0.269	0.41	4.98912e-11	1.44931	1.29697
SOX17	5.84018e-14	-0.219648	0.052	0.115	1.63175e-09	0.496917	0.344668
YWHAZ	8.49357e-14	-0.219581	0.266	0.4	2.3731e-09	1.39081	1.23861
RPS16	8.76456e-16	-0.219454	0.151	0.264	2.44882e-11	0.950704	0.79859
TPI1	3.98347e-15	-0.219289	0.078	0.158	1.11298e-10	0.657818	0.505818
ZBTB10	4.13982e-07	-0.219143	0.082	0.132	0.0115666	0.610052	0.458153
JUN	8.66532e-07	-0.218221	0.293	0.374	0.0242109	1.70917	1.55791
GPAT4	1.06001e-06	-0.217928	0.082	0.129	0.0296166	0.676309	0.525253
UBE2K	1.26709e-11	-0.217739	0.105	0.183	3.54024e-07	0.710329	0.559404
CAMSAP2	7.60569e-17	-0.217107	0.089	0.179	2.12503e-12	0.691102	0.540615
SEC16A	1.67349e-11	-0.217034	0.087	0.157	4.67574e-07	0.726446	0.57601
SLFN13	2.42115e-12	-0.216765	0.063	0.126	6.76469e-08	0.573671	0.42342
CMIP	4.89393e-11	-0.216569	0.106	0.183	1.36737e-06	0.810295	0.660181
PKP4	1.55876e-15	-0.216335	0.202	0.33	4.35518e-11	1.26731	1.11735
GALNT11	1.7881e-10	-0.2159	0.069	0.128	4.99594e-06	0.520397	0.370746
TPT1	2.48322e-14	-0.215298	0.252	0.387	6.93812e-10	1.41938	1.27015
PPP4R1	3.68055e-10	-0.215237	0.19	0.286	1.02834e-05	1.11782	0.968632
BX890604.2	3.97511e-07	-0.214893	0.37	0.464	0.0111064	1.92912	1.78017
PIM3	2.73925e-17	-0.214722	0.132	0.243	7.65348e-13	0.919471	0.770637
HDGF	5.48813e-19	-0.214446	0.142	0.263	1.53338e-14	0.950827	0.802184
RBBP8	1.75356e-12	-0.213943	0.154	0.25	4.89944e-08	1.05903	0.910736
TNFRSF10B	1.62316e-18	-0.213855	0.074	0.161	4.53511e-14	0.599543	0.451309
CDK5RAP2	1.18471e-06	-0.212232	0.144	0.208	0.0331009	1.03844	0.891328
TP53BP2	7.31331e-20	-0.212144	0.071	0.161	2.04334e-15	0.66091	0.513863
SINHCAF	1.24747e-12	-0.211891	0.109	0.193	3.48542e-08	0.758032	0.61116
PRKAR1A	8.71899e-12	-0.211847	0.102	0.179	2.43609e-07	0.674813	0.527972
SFXN2	3.58573e-18	-0.211757	0.067	0.15	1.00185e-13	0.586833	0.440054
ERBIN	2.83292e-13	-0.211577	0.155	0.257	7.91517e-09	0.968799	0.822145
MICOS10	1.22778e-18	-0.211434	0.047	0.119	3.43042e-14	0.445645	0.29909
PRDM2	7.49883e-12	-0.211127	0.197	0.302	2.09517e-07	1.14461	0.998272
ARRDC3	1.96658e-13	-0.210707	0.125	0.215	5.49463e-09	0.892893	0.746842
TRA2A	1.27424e-07	-0.209666	0.284	0.382	0.00356022	1.4648	1.31947
ACTR2	9.32079e-11	-0.20966	0.139	0.224	2.60423e-06	0.834347	0.689021
S100A6	4.7799e-09	-0.209252	0.143	0.219	0.00013355	0.953651	0.808609
BANP	1.63661e-10	-0.208965	0.058	0.113	4.5727e-06	0.520485	0.375642
NCOA7	3.95994e-12	-0.208666	0.147	0.239	1.10641e-07	1.07232	0.927684
RPL13	2.96226e-09	-0.208168	0.3	0.42	8.27656e-05	1.59159	1.4473
MYO6	7.28682e-11	-0.208055	0.325	0.456	2.03594e-06	1.6176	1.47339
KLC1	3.50947e-11	-0.208045	0.243	0.359	9.80547e-07	1.33486	1.19066
MAP3K2	5.31427e-13	-0.207664	0.163	0.265	1.48481e-08	0.967695	0.823753
NHS	1.02178e-18	-0.207592	0.081	0.174	2.85484e-14	0.658094	0.514203
ZNF273	1.65159e-21	-0.207351	0.044	0.121	4.61455e-17	0.44047	0.296746
SREBF2	8.75804e-16	-0.207269	0.086	0.172	2.447e-11	0.654696	0.511029
CDC42SE1	2.40897e-09	-0.207201	0.071	0.128	6.73066e-05	0.570973	0.427352
MAP4K4	1.96773e-12	-0.206903	0.194	0.302	5.49783e-08	1.18571	1.04229
TMEM43	1.77545e-08	-0.206704	0.115	0.18	0.000496061	0.797153	0.653877
IFT57	5.4366e-14	-0.206566	0.092	0.173	1.51899e-09	0.714478	0.571298
RING1	2.92543e-08	-0.206318	0.062	0.111	0.000817366	0.522475	0.379466
VCP	1.69899e-17	-0.206294	0.107	0.208	4.74699e-13	0.833383	0.69039
TSC22D2	4.32688e-14	-0.206255	0.067	0.138	1.20893e-09	0.544446	0.401481
PRRC2C	1.67637e-08	-0.206186	0.563	0.685	0.000468379	2.32431	2.18139
AKIRIN1	2.0819e-25	-0.206098	0.072	0.177	5.81684e-21	0.579014	0.436158
FAM3C	8.51502e-13	-0.205654	0.06	0.123	2.3791e-08	0.509032	0.366483
PSAP	1.22685e-16	-0.205475	0.103	0.199	3.42783e-12	0.771638	0.629214
KATNBL1	6.27614e-12	-0.205342	0.191	0.299	1.75355e-07	1.08209	0.939759
RGL2	1.22115e-13	-0.205282	0.086	0.163	3.4119e-09	0.694814	0.552523
SEPTIN10	2.41305e-09	-0.204722	0.087	0.148	6.74206e-05	0.625909	0.484007
RHOU	9.0931e-14	-0.20439	0.043	0.1	2.54061e-09	0.404368	0.262696
GTPBP2	2.2121e-07	-0.204039	0.061	0.105	0.00618059	0.545636	0.404207
CCNI	1.37668e-10	-0.203986	0.119	0.197	3.84643e-06	0.807339	0.665946
CDC14A	8.39024e-10	-0.203916	0.063	0.118	2.34423e-05	0.563066	0.421722
DUSP1	3.57635e-15	-0.203311	0.22	0.353	9.99233e-11	1.36087	1.21995
ANKRD10	4.19652e-10	-0.20322	0.236	0.343	1.17251e-05	1.24728	1.10642
PANK2	8.33057e-11	-0.202888	0.087	0.155	2.32756e-06	0.662465	0.521834
ODF2L	2.45596e-12	-0.201966	0.301	0.434	6.86195e-08	1.51657	1.37658
ZNF83	3.16893e-13	-0.201697	0.279	0.416	8.854e-09	1.45863	1.31883
MFSD12	1.09964e-15	-0.201497	0.047	0.111	3.0724e-11	0.433572	0.293905
EFHC1	2.02195e-12	-0.201027	0.079	0.15	5.64934e-08	0.624156	0.484814
TET3	1.29055e-07	-0.200763	0.073	0.122	0.00360579	0.622157	0.482999
CAPRIN2	2.26033e-10	-0.200647	0.084	0.148	6.31536e-06	0.638113	0.499035
KLF10	5.41377e-12	-0.200643	0.057	0.116	1.51261e-07	0.523106	0.384031
RPS28	1.54433e-15	-0.200454	0.152	0.264	4.31485e-11	1.00458	0.865632
CEP85L	9.87342e-14	-0.199853	0.048	0.108	2.75863e-09	0.455454	0.316927
UBE2E3	1.33455e-09	-0.199427	0.066	0.121	3.72874e-05	0.542211	0.403979
TULP3	2.70383e-11	-0.199418	0.048	0.101	7.5545e-07	0.449355	0.31113
CHML	1.15926e-13	-0.199297	0.069	0.139	3.23898e-09	0.527197	0.389055
HIST1H4C	1.22034e-15	-0.199095	0.047	0.111	3.40963e-11	0.431258	0.293256
AHSA1	8.97399e-18	-0.198984	0.037	0.101	2.50733e-13	0.364369	0.226444
FBXO42	6.69831e-07	-0.19883	0.094	0.146	0.0187151	0.688234	0.550415
NORAD	4.6646e-11	-0.198273	0.146	0.233	1.30329e-06	0.857372	0.719939
PACS2	5.25922e-08	-0.197818	0.09	0.148	0.00146943	0.696286	0.559169
DYNLT1	2.75235e-14	-0.197651	0.06	0.128	7.69006e-10	0.480919	0.343917
OSBPL9	2.34802e-08	-0.197308	0.108	0.172	0.000656038	0.758556	0.621793
ERF	9.14024e-15	-0.197132	0.044	0.105	2.55378e-10	0.447333	0.310692
AEBP2	6.32739e-16	-0.196943	0.079	0.161	1.76787e-11	0.623208	0.486698
KCTD1	6.4364e-21	-0.196105	0.037	0.107	1.79833e-16	0.368042	0.232112
GNAI3	2.65813e-14	-0.195755	0.097	0.181	7.42681e-10	0.690605	0.554917
CSRNP1	6.52596e-22	-0.195286	0.042	0.119	1.82335e-17	0.428524	0.293162
MT-CO3	1.66884e-06	-0.19524	0.688	0.758	0.0466274	3.59266	3.45733
TAOK1	6.85208e-12	-0.195152	0.18	0.283	1.91447e-07	1.05247	0.917205
RPS15	2.22468e-12	-0.195094	0.07	0.138	6.21575e-08	0.554937	0.419708
GRAMD1A	3.70529e-13	-0.195018	0.102	0.186	1.03526e-08	0.743104	0.607928
ZNF736	1.43144e-14	-0.19497	0.059	0.127	3.99944e-10	0.436565	0.301422
NSFL1C	7.87839e-08	-0.194758	0.064	0.112	0.00220122	0.541118	0.406122
TMEM30A	8.63182e-15	-0.194685	0.055	0.122	2.41173e-10	0.445778	0.310833
HNRNPF	1.31917e-09	-0.194242	0.06	0.112	3.68575e-05	0.508347	0.373708
RPS27	1.56717e-17	-0.194237	0.114	0.218	4.37868e-13	0.821589	0.686954
SAMD4B	6.56506e-14	-0.193804	0.164	0.273	1.83428e-09	1.0233	0.888969
CLIP4	6.62789e-15	-0.193124	0.041	0.1	1.85183e-10	0.40476	0.270897
RPS19	9.32061e-15	-0.193122	0.124	0.222	2.60418e-10	0.845	0.711139
CTNNAL1	8.47381e-08	-0.192855	0.074	0.124	0.00236758	0.61024	0.476563
CD74	4.05578e-16	-0.192783	0.164	0.281	1.13319e-11	1.1119	0.978276
AC159540.2	1.60886e-17	-0.192781	0.053	0.126	4.49516e-13	0.42861	0.294985
OSBPL3	4.76274e-14	-0.19278	0.134	0.233	1.33071e-09	0.892545	0.75892
AC027031.2	3.3092e-10	-0.192129	0.059	0.114	9.24592e-06	0.521227	0.388053
PISD	2.09365e-10	-0.191977	0.097	0.166	5.84967e-06	0.713603	0.580535
PIP4K2A	9.53429e-16	-0.190815	0.06	0.133	2.66388e-11	0.543096	0.410833
RPS6KA3	3.90493e-09	-0.19052	0.09	0.153	0.000109104	0.670547	0.538488
WDFY2	1.43333e-09	-0.190123	0.064	0.119	4.00473e-05	0.524866	0.393083
CHSY1	2.96202e-09	-0.190062	0.056	0.105	8.27589e-05	0.486743	0.355001
LRIG1	9.57679e-10	-0.189989	0.077	0.137	2.67576e-05	0.594027	0.462336
KIFC3	5.46802e-11	-0.189983	0.08	0.146	1.52776e-06	0.677246	0.54556
ZNF496	1.70609e-21	-0.189659	0.033	0.101	4.76683e-17	0.376795	0.245334
SUCO	2.70094e-17	-0.189487	0.085	0.176	7.54642e-13	0.634401	0.503059
CYFIP1	1.61601e-09	-0.18947	0.113	0.185	4.51514e-05	0.81357	0.682239
PIAS3	1.59459e-10	-0.189448	0.049	0.101	4.45527e-06	0.430979	0.299664
LONRF1	2.14678e-10	-0.189154	0.079	0.144	5.9981e-06	0.630382	0.499271
CP	6.18611e-15	-0.188829	0.225	0.349	1.7284e-10	1.68006	1.54918
KSR1	1.2843e-07	-0.188429	0.099	0.157	0.00358833	0.785627	0.655018
SOX6	1.85062e-13	-0.188332	0.07	0.14	5.17062e-09	0.557256	0.426714
ZNF664	2.16958e-16	-0.188311	0.067	0.145	6.0618e-12	0.542568	0.412041
RPS6KA5	9.81439e-07	-0.188148	0.241	0.326	0.0274214	1.40529	1.27488
OXSR1	1.07166e-14	-0.187935	0.079	0.158	2.99422e-10	0.612497	0.48223
UHMK1	6.15104e-17	-0.187777	0.078	0.163	1.7186e-12	0.539864	0.409707
PAX8	1.94971e-24	-0.187026	0.349	0.562	5.4475e-20	2.21944	2.0898
PIK3CA	5.03309e-09	-0.186881	0.061	0.113	0.000140624	0.50518	0.375644
MTCH1	1.36552e-09	-0.186732	0.196	0.292	3.81527e-05	1.11064	0.981211
HIVEP1	4.689e-09	-0.186724	0.19	0.281	0.000131011	1.17976	1.05034
ENAH	9.72662e-13	-0.186238	0.091	0.168	2.71762e-08	0.654346	0.525256
ACIN1	5.08327e-08	-0.186107	0.279	0.38	0.00142027	1.42729	1.29829
YWHAQ	1.17843e-10	-0.185159	0.117	0.194	3.29252e-06	0.773885	0.645543
GDI1	9.65964e-08	-0.184996	0.058	0.104	0.0026989	0.506851	0.378622
RB1	1.12327e-16	-0.184976	0.132	0.24	3.13843e-12	0.858533	0.730318
ITCH	1.30714e-10	-0.184343	0.147	0.234	3.65216e-06	0.934468	0.806691
KDM3A	6.19964e-07	-0.184268	0.093	0.145	0.0173218	0.738119	0.610394
MAPK1IP1L	9.26387e-17	-0.184102	0.099	0.193	2.58833e-12	0.64579	0.51818
DMKN	1.04122e-20	-0.184063	0.156	0.29	2.90916e-16	1.02597	0.898383
AC016831.5	1.948e-13	-0.183421	0.128	0.221	5.44271e-09	0.838767	0.711629
GALNT7	1.37685e-13	-0.183273	0.116	0.206	3.84692e-09	0.780315	0.65328
EPHA2	3.98522e-15	-0.18173	0.045	0.107	1.11347e-10	0.449847	0.323882
PTPRG	2.88453e-11	-0.181493	0.136	0.223	8.05938e-07	0.86915	0.743349
WNT7A	7.16742e-12	-0.181207	0.059	0.119	2.00258e-07	0.480059	0.354455
CAMTA1	3.62151e-14	-0.181144	0.056	0.122	1.01185e-09	0.479097	0.353537
ZBED3-AS1	2.27156e-19	-0.180804	0.045	0.118	6.34673e-15	0.424651	0.299327
B4GALT5	5.24119e-15	-0.180665	0.055	0.122	1.46439e-10	0.462587	0.33736
RBMS2	1.16074e-11	-0.180249	0.056	0.114	3.2431e-07	0.471187	0.346248
RNF145	3.74106e-08	-0.180191	0.164	0.242	0.00104525	1.02083	0.895931
ATP9A	4.55504e-10	-0.180009	0.09	0.156	1.27268e-05	0.667579	0.542805
PRAME	1.57117e-24	-0.178667	0.043	0.126	4.38985e-20	0.410415	0.286572
CPNE1	2.70727e-08	-0.178348	0.073	0.125	0.000756412	0.599977	0.476356
C1RL	3.79145e-11	-0.17754	0.085	0.155	1.05933e-06	0.642968	0.519907
MAFG	1.34306e-06	-0.177277	0.073	0.118	0.037525	0.555115	0.432237
MOCOS	2.74759e-13	-0.177107	0.087	0.164	7.67676e-09	0.694957	0.572195
PPP2CB	3.92762e-08	-0.177018	0.057	0.103	0.00109738	0.472412	0.349712
MAST4	9.88428e-11	-0.176945	0.092	0.162	2.76167e-06	0.704152	0.581503
NPDC1	3.37382e-08	-0.176791	0.15	0.225	0.000942644	1.0078	0.885257
ERV3-1	4.52357e-18	-0.176321	0.058	0.137	1.26389e-13	0.450033	0.327816
LINC00174	9.49601e-09	-0.175918	0.066	0.119	0.000265318	0.506837	0.3849
SETX	1.25299e-06	-0.175914	0.281	0.378	0.0350086	1.42194	1.30001
MKNK2	1.33952e-09	-0.175594	0.113	0.184	3.74262e-05	0.779147	0.657435
OSMR	2.11534e-13	-0.175465	0.07	0.141	5.91026e-09	0.575957	0.454334
MPPED2	1.269e-16	-0.175214	0.038	0.1	3.54558e-12	0.393451	0.272001
TSPYL2	9.86219e-07	-0.174912	0.063	0.105	0.027555	0.565859	0.44462
TPGS2	1.34728e-11	-0.174788	0.062	0.122	3.76431e-07	0.481143	0.35999
ABHD2	1.93012e-09	-0.174481	0.058	0.11	5.39275e-05	0.476973	0.356032
DUSP5	4.35717e-18	-0.174359	0.049	0.121	1.21739e-13	0.513553	0.392697
DMWD	1.35645e-06	-0.174299	0.093	0.144	0.0378993	0.711261	0.590447
ADSS	8.79833e-18	-0.173952	0.061	0.14	2.45825e-13	0.535887	0.415312
INO80D	3.80116e-12	-0.173695	0.164	0.266	1.06204e-07	0.954561	0.834165
MEF2D	4.39057e-17	-0.173462	0.043	0.108	1.22673e-12	0.395227	0.274992
CD2AP	1.07962e-07	-0.173155	0.222	0.31	0.00301646	1.17807	1.05805
NRARP	3.78727e-07	-0.173078	0.075	0.123	0.0105816	0.587093	0.467124
NAALADL2	6.03097e-10	-0.172854	0.086	0.151	1.68505e-05	0.634856	0.515043
FBXO11	8.83395e-10	-0.172763	0.109	0.181	2.46821e-05	0.723764	0.604014
MFHAS1	1.34305e-15	-0.172648	0.114	0.211	3.75248e-11	0.780639	0.660969
IBTK	5.8287e-09	-0.172533	0.138	0.215	0.000162854	0.863287	0.743696
ACTR3	8.05261e-13	-0.171939	0.147	0.246	2.2499e-08	0.898884	0.779705
SIN3B	2.85724e-10	-0.171132	0.203	0.304	7.98314e-06	1.16437	1.04575
NAA50	1.27033e-11	-0.170614	0.072	0.137	3.54931e-07	0.524544	0.406283
KHDC4	1.90654e-09	-0.170451	0.249	0.358	5.32688e-05	1.27673	1.15858
ATN1	5.08356e-10	-0.169999	0.097	0.165	1.42035e-05	0.694478	0.576643
C3orf52	1.26723e-09	-0.169673	0.07	0.127	3.54064e-05	0.553439	0.435831
RPS4X	3.27245e-07	-0.168725	0.097	0.152	0.00914322	0.699794	0.582843
TBC1D5	1.05225e-08	-0.168693	0.076	0.132	0.000294	0.578013	0.461084
GPX4	1.0584e-10	-0.16765	0.06	0.116	2.95717e-06	0.522007	0.4058
CASP4	3.94854e-11	-0.167545	0.109	0.187	1.10322e-06	0.775283	0.65915
SMARCC1	1.60453e-09	-0.167494	0.182	0.275	4.48305e-05	1.08241	0.966314
JDP2	9.28888e-17	-0.167426	0.041	0.105	2.59531e-12	0.423964	0.307913
PNPLA8	2.98221e-11	-0.167151	0.068	0.13	8.33231e-07	0.533822	0.417962
MAPK1	8.36475e-10	-0.167137	0.099	0.168	2.33711e-05	0.685748	0.569898
AL021368.2	2.41387e-10	-0.167017	0.116	0.191	6.74437e-06	0.712536	0.596768
OBSCN	4.45405e-10	-0.16671	0.093	0.161	1.24446e-05	0.694914	0.579359
NECAP2	2.76477e-15	-0.166423	0.045	0.108	7.72477e-11	0.398928	0.283572
ABCC5	9.7058e-09	-0.165106	0.089	0.149	0.00027118	0.648377	0.533934
RFX1	1.25239e-09	-0.164812	0.082	0.144	3.49918e-05	0.629483	0.515244
ZNF618	2.01839e-14	-0.164604	0.047	0.108	5.63937e-10	0.41993	0.305836
CERT1	1.06279e-12	-0.164213	0.196	0.309	2.96943e-08	1.12364	1.00982
RBM8A	4.76971e-09	-0.163613	0.079	0.137	0.000133266	0.60098	0.487572
HIVEP2	1.85949e-21	-0.163543	0.09	0.196	5.19541e-17	0.722	0.60864
CASZ1	1.43805e-08	-0.163446	0.187	0.274	0.000401791	1.11648	1.00318
CEP70	2.21294e-11	-0.162855	0.136	0.225	6.18295e-07	0.853276	0.740394
RPL35A	2.69578e-08	-0.16279	0.095	0.155	0.000753202	0.682387	0.56955
CHL1	6.83672e-11	-0.162727	0.08	0.145	1.91018e-06	0.632463	0.519669
NFAT5	4.40822e-08	-0.162631	0.297	0.408	0.00123166	1.47672	1.36399
NFE2L2	2.03496e-10	-0.162436	0.19	0.29	5.68569e-06	1.06917	0.956574
SIPA1L1	1.30973e-12	-0.161454	0.138	0.232	3.65938e-08	0.864509	0.752597
KPNA4	5.59239e-09	-0.161381	0.109	0.176	0.000156251	0.713771	0.60191
TMEM9B-AS1	2.91262e-14	-0.160222	0.06	0.129	8.13785e-10	0.468382	0.357325
TOMM20	2.21873e-17	-0.160209	0.07	0.153	6.19912e-13	0.507911	0.396863
SLC7A2	3.31788e-08	-0.159891	0.252	0.348	0.000927016	1.60605	1.49522
STIP1	9.93003e-19	-0.159549	0.06	0.141	2.77445e-14	0.480292	0.369701
OXR1	1.32929e-11	-0.159284	0.203	0.312	3.71403e-07	1.13645	1.02604
MYL6	4.78999e-12	-0.158564	0.179	0.285	1.33832e-07	1.05864	0.948734
ST3GAL6	3.483e-12	-0.158478	0.057	0.117	9.73151e-08	0.443304	0.333455
MAGI1	8.53437e-08	-0.157581	0.199	0.285	0.0023845	1.11345	1.00422
ITGB1	3.96618e-10	-0.15747	0.248	0.36	1.10815e-05	1.3032	1.19405
FKBP11	4.7429e-13	-0.157413	0.073	0.144	1.32517e-08	0.591115	0.482004
AGO3	2.37083e-11	-0.156886	0.19	0.296	6.62411e-07	1.03779	0.929044
ASXL1	9.10586e-09	-0.156362	0.204	0.3	0.000254418	1.17951	1.07113
HDAC7	3.87227e-11	-0.156203	0.191	0.296	1.08191e-06	1.16532	1.05705
KHDRBS1	6.46159e-09	-0.156113	0.124	0.197	0.000180537	0.74767	0.63946
NFATC4	3.31968e-12	-0.156007	0.046	0.101	9.27519e-08	0.474673	0.366537
DCBLD2	1.65146e-19	-0.155809	0.062	0.146	4.61419e-15	0.511106	0.403107
CDK19	5.87718e-12	-0.155798	0.056	0.115	1.64209e-07	0.45102	0.343029
B3GALNT2	9.22095e-11	-0.155153	0.104	0.179	2.57633e-06	0.699229	0.591685
ERGIC1	1.55714e-07	-0.155009	0.244	0.34	0.00435066	1.30097	1.19353
ADNP	1.26695e-10	-0.15481	0.13	0.211	3.53985e-06	0.810645	0.703339
PFKP	1.08516e-06	-0.154655	0.09	0.14	0.0303195	0.686731	0.579532
WDR91	5.85247e-08	-0.154483	0.074	0.126	0.00163518	0.576137	0.469058
SDC4	2.90018e-15	-0.154216	0.073	0.151	8.1031e-11	0.587904	0.48101
STX6	5.23786e-19	-0.153914	0.052	0.128	1.46346e-14	0.444391	0.337706
UBE2B	7.39235e-11	-0.153452	0.1	0.172	2.06542e-06	0.667373	0.561008
NONO	9.77934e-12	-0.153161	0.125	0.21	2.73235e-07	0.768223	0.66206
FBXL20	1.07569e-08	-0.152735	0.078	0.134	0.000300548	0.572073	0.466205
ARSG	2.66783e-10	-0.152646	0.056	0.11	7.45391e-06	0.448738	0.342932
ERC1	5.88796e-07	-0.15241	0.201	0.282	0.016451	1.15815	1.05251
TMBIM1	8.92074e-08	-0.152393	0.076	0.129	0.00249245	0.583273	0.477642
PGGHG	2.96185e-12	-0.152375	0.257	0.389	8.27541e-08	1.62718	1.52157
STX3	1.7138e-11	-0.152314	0.095	0.168	4.78835e-07	0.65854	0.552964
ATP11A	4.45392e-16	-0.152202	0.169	0.29	1.24443e-11	1.09192	0.986424
TLE3	7.45512e-10	-0.152142	0.063	0.119	2.08296e-05	0.524046	0.41859
E2F3	1.43998e-07	-0.151893	0.062	0.108	0.00402329	0.528178	0.422894
FLVCR1	1.19175e-20	-0.151704	0.041	0.115	3.32975e-16	0.346742	0.241589
BCL9L	8.1625e-10	-0.151464	0.061	0.115	2.2806e-05	0.522208	0.417221
FSTL1	6.65786e-09	-0.151134	0.092	0.154	0.000186021	0.70077	0.596011
HERC4	2.25307e-07	-0.150917	0.242	0.334	0.00629507	1.22841	1.1238
RNF44	2.05719e-11	-0.150896	0.073	0.138	5.7478e-07	0.563383	0.45879
NEIL1	7.59719e-14	-0.150707	0.121	0.215	2.12265e-09	0.816334	0.711872
ZDHHC9	2.04814e-08	-0.150199	0.056	0.103	0.00057225	0.450259	0.346149
LAMA5	1.18918e-12	-0.150142	0.114	0.2	3.32256e-08	0.837085	0.733014
EDEM3	1.76292e-11	-0.149883	0.09	0.162	4.9256e-07	0.625663	0.521773
TYMP	4.98599e-12	-0.149837	0.14	0.232	1.39308e-07	0.97074	0.866881
ZRANB1	1.17665e-08	-0.14976	0.092	0.154	0.000328755	0.674846	0.57104
RRBP1	8.43102e-07	-0.149752	0.466	0.576	0.0235563	2.03544	1.93164
PTPN1	3.49814e-08	-0.149751	0.097	0.156	0.000977381	0.683569	0.57977
ARPC3	1.01461e-08	-0.149646	0.063	0.115	0.000283481	0.480168	0.376442
FTH1	1.04053e-08	-0.149102	0.23	0.328	0.000290725	1.31185	1.2085
RPS7	7.9836e-10	-0.148903	0.18	0.274	2.23062e-05	1.0264	0.923193
MAML2	2.23069e-07	-0.148565	0.172	0.247	0.00623254	1.00076	0.897782
NFKBIZ	4.08826e-07	-0.148515	0.241	0.327	0.0114226	1.3424	1.23946
MYH10	1.09491e-10	-0.148355	0.058	0.114	3.05919e-06	0.514638	0.411806
ZNF608	1.05202e-06	-0.148061	0.105	0.16	0.0293935	0.708165	0.605537
ABHD11	4.60886e-07	-0.147894	0.157	0.225	0.0128772	0.937853	0.83534
ADGRL2	2.74717e-14	-0.147879	0.064	0.135	7.67559e-10	0.485229	0.382727
BLOC1S6	4.27979e-08	-0.147862	0.07	0.122	0.00119577	0.517402	0.414912
UPF1	2.16329e-09	-0.147854	0.086	0.148	6.04424e-05	0.662124	0.559639
LAMP1	7.13722e-13	-0.147347	0.059	0.123	1.99414e-08	0.475105	0.372972
CDC42	2.66947e-10	-0.147242	0.165	0.259	7.45851e-06	0.923734	0.821673
RPS12	4.92284e-12	-0.147125	0.111	0.194	1.37544e-07	0.795322	0.693343
CAPZA2	6.16637e-10	-0.146965	0.115	0.189	1.72288e-05	0.725607	0.623739
ENSA	8.51095e-15	-0.146545	0.137	0.24	2.37796e-10	0.834855	0.733278
PUM1	3.57923e-10	-0.146535	0.234	0.345	1.00004e-05	1.22168	1.12011
SEMA3C	4.5919e-16	-0.146503	0.084	0.17	1.28298e-11	0.630531	0.528983
DDR1	7.44425e-07	-0.146224	0.078	0.127	0.0207992	0.550958	0.449603
ICA1	7.38613e-14	-0.145838	0.153	0.26	2.06368e-09	0.953327	0.85224
NFIC	8.05845e-12	-0.145762	0.188	0.296	2.25153e-07	1.11048	1.00944
CA12	1.49329e-06	-0.145503	0.154	0.221	0.0417224	1.03162	0.930764
TENT4B	5.53392e-10	-0.14528	0.06	0.115	1.54618e-05	0.473434	0.372733
CPSF6	5.41172e-07	-0.144576	0.18	0.257	0.0151204	0.981879	0.881667
CLCN7	1.17842e-07	-0.144521	0.07	0.119	0.00329251	0.551086	0.450912
MAU2	1.63089e-06	-0.144509	0.121	0.18	0.0455672	0.776186	0.67602
HIPK3	2.17353e-07	-0.144243	0.128	0.194	0.00607285	0.787474	0.687492
KDSR	3.83023e-07	-0.144102	0.088	0.14	0.0107017	0.603081	0.503197
MYEF2	1.53749e-09	-0.143692	0.126	0.203	4.29574e-05	0.808598	0.708998
CCDC144A	2.42867e-08	-0.143658	0.197	0.287	0.000678571	1.17487	1.0753
PCAT1	6.93029e-14	-0.143511	0.098	0.183	1.93632e-09	0.781038	0.681564
B4GALT4	1.27011e-07	-0.143455	0.088	0.144	0.00354868	0.605377	0.505941
SMG5	8.06264e-13	-0.143237	0.048	0.105	2.2527e-08	0.409763	0.310479
UBE2I	2.44611e-09	-0.14298	0.212	0.31	6.83443e-05	1.17289	1.07379
HLA-C	1.86115e-12	-0.142786	0.145	0.243	5.20005e-08	0.89851	0.799538
CSNK1A1	1.18482e-07	-0.142754	0.456	0.576	0.00331038	1.91791	1.81896
BIRC2	6.16685e-09	-0.142601	0.109	0.176	0.000172302	0.681544	0.5827
TOP1	5.46191e-08	-0.14239	0.198	0.285	0.00152606	1.1729	1.0742
PLEKHB2	9.87715e-11	-0.14208	0.067	0.127	2.75968e-06	0.478225	0.379743
RUNX1	9.67773e-09	-0.141982	0.102	0.168	0.000270396	0.721893	0.623479
MARCH7	7.09488e-12	-0.141784	0.155	0.253	1.98231e-07	0.884452	0.786176
PTBP3	9.33367e-08	-0.141651	0.173	0.253	0.00260783	0.957439	0.859254
NUCKS1	3.5608e-10	-0.14155	0.151	0.239	9.94886e-06	0.959851	0.861736
RPL28	1.20945e-12	-0.139105	0.141	0.236	3.37919e-08	0.909833	0.813413
RLIM	4.23554e-12	-0.138444	0.073	0.14	1.18341e-07	0.514648	0.418686
Z95331.1	2.59257e-09	-0.138352	0.091	0.154	7.24363e-05	0.599473	0.503575
FAM199X	1.61749e-06	-0.138322	0.059	0.101	0.0451926	0.420401	0.324524
DPY19L3	2.23874e-07	-0.13809	0.09	0.145	0.00625503	0.626087	0.53037
LINC01278	3.96527e-17	-0.137565	0.047	0.115	1.1079e-12	0.375002	0.279649
ANXA5	5.12317e-13	-0.137562	0.147	0.244	1.43141e-08	1.01452	0.91917
RPL34	1.32082e-07	-0.137408	0.137	0.207	0.00369038	0.90425	0.809006
DNAJB11	9.18002e-11	-0.13645	0.064	0.123	2.5649e-06	0.499569	0.404989
HLA-B	3.40471e-11	-0.13631	0.244	0.364	9.51275e-07	1.30762	1.21313
ZDHHC13	1.84841e-14	-0.136292	0.094	0.178	5.16446e-10	0.633654	0.539184
IL6ST	7.94709e-09	-0.136231	0.153	0.235	0.000222042	0.927892	0.833464
HNF1B	3.7653e-11	-0.136084	0.145	0.235	1.05203e-06	0.945883	0.851557
AC012020.1	1.59661e-14	-0.135992	0.053	0.118	4.46093e-10	0.439126	0.344864
PARP9	4.89408e-13	-0.135639	0.063	0.129	1.36741e-08	0.521679	0.427662
PDLIM5	1.92327e-10	-0.135483	0.182	0.282	5.37362e-06	1.01117	0.917265
ANKRD10-IT1	7.78038e-13	-0.135252	0.093	0.172	2.17384e-08	0.5579	0.464151
AOPEP	6.20301e-09	-0.135091	0.132	0.207	0.000173312	0.834012	0.740374
CAMSAP1	2.00442e-10	-0.134812	0.059	0.114	5.60034e-06	0.472502	0.379057
SS18L1	8.15357e-07	-0.133871	0.07	0.115	0.0227811	0.491019	0.398227
WDR45B	2.5078e-08	-0.133632	0.14	0.215	0.00070068	0.891741	0.799114
PACS1	9.83999e-08	-0.133359	0.072	0.122	0.00274929	0.558165	0.465727
L3MBTL4	2.09642e-11	-0.133276	0.069	0.133	5.85739e-07	0.505476	0.413096
CSGALNACT2	4.07134e-12	-0.133131	0.047	0.103	1.13753e-07	0.394552	0.302273
RESF1	2.74859e-07	-0.133003	0.34	0.442	0.00767955	1.90556	1.81337
CLCN6	2.31123e-08	-0.132738	0.059	0.107	0.000645758	0.457766	0.365759
AC026356.1	5.04704e-07	-0.132374	0.06	0.103	0.0141014	0.446668	0.354914
USP22	4.82413e-15	-0.132214	0.142	0.25	1.34786e-10	0.873815	0.782172
REC8	4.69775e-11	-0.132103	0.059	0.117	1.31255e-06	0.499684	0.408117
SET	1.32161e-09	-0.131912	0.125	0.201	3.69256e-05	0.780723	0.689288
FAM131A	4.35634e-08	-0.131912	0.055	0.101	0.00121716	0.47058	0.379146
PCBP1-AS1	3.07912e-11	-0.131811	0.067	0.129	8.60307e-07	0.490089	0.398725
CLDND1	7.3678e-10	-0.131255	0.058	0.112	2.05856e-05	0.422882	0.331902
DNMT3A	2.71529e-12	-0.130529	0.11	0.195	7.58653e-08	0.753671	0.663196
DENND11	1.58755e-13	-0.130428	0.121	0.215	4.43561e-09	0.750645	0.660239
MYO9B	1.43929e-07	-0.129361	0.16	0.233	0.00402137	1.03198	0.942309
KAZN	2.20843e-11	-0.129347	0.092	0.165	6.17036e-07	0.643236	0.553579
RPL15	3.15963e-09	-0.129293	0.086	0.148	8.82799e-05	0.581041	0.491422
FTL	3.82301e-09	-0.129138	0.076	0.134	0.000106815	0.578075	0.488563
SPART	6.05281e-12	-0.1286	0.083	0.153	1.69116e-07	0.610943	0.521804
ZNF888	1.03862e-11	-0.128348	0.064	0.126	2.90191e-07	0.481785	0.39282
SRP14	1.0003e-11	-0.128154	0.054	0.112	2.79483e-07	0.445249	0.356419
LONRF2	3.0082e-19	-0.126975	0.214	0.369	8.40492e-15	1.41179	1.32378
IQGAP1	1.25326e-06	-0.126409	0.314	0.416	0.035016	1.49643	1.40881
NFATC1	8.51319e-12	-0.126164	0.047	0.101	2.37859e-07	0.476876	0.389426
TLE4	1.9629e-07	-0.12614	0.088	0.143	0.00548435	0.689892	0.602459
ARHGEF2	2.61928e-11	-0.126108	0.146	0.239	7.31827e-07	0.911589	0.824177
CYTH1	6.76251e-11	-0.12596	0.127	0.211	1.88945e-06	0.841196	0.753888
ZNF24	1.33323e-08	-0.125508	0.104	0.17	0.000372504	0.624158	0.537163
GUK1	1.19592e-12	-0.125223	0.091	0.168	3.34139e-08	0.627622	0.540824
ZNF117	9.50304e-13	-0.125024	0.099	0.18	2.65515e-08	0.636981	0.55032
RAB21	2.12437e-09	-0.12491	0.086	0.15	5.93548e-05	0.59811	0.511529
ARPC1B	9.50137e-11	-0.124589	0.113	0.192	2.65468e-06	0.717126	0.630767
ZNF160	1.14029e-09	-0.124386	0.103	0.173	3.18598e-05	0.71908	0.632862
RNF207	3.57427e-07	-0.12405	0.093	0.148	0.00998652	0.611889	0.525904
WDR1	2.42046e-08	-0.123829	0.068	0.119	0.000676276	0.518986	0.433155
TJP2	5.17871e-09	-0.123486	0.176	0.265	0.000144693	1.02993	0.944337
RPS29	5.74249e-11	-0.123404	0.118	0.2	1.60445e-06	0.76169	0.676153
CLDN10	7.05164e-13	-0.123352	0.047	0.104	1.97023e-08	0.403215	0.317714
SP1	9.47445e-14	-0.123309	0.104	0.191	2.64716e-09	0.698931	0.613459
ID1	6.25037e-10	-0.123064	0.168	0.26	1.74635e-05	1.09386	1.00856
IDS	5.93235e-07	-0.122997	0.131	0.195	0.016575	0.817012	0.731757
MROH1	6.51161e-10	-0.1228	0.161	0.25	1.81934e-05	0.980188	0.89507
MEIS1	1.58018e-15	-0.122124	0.147	0.258	4.41503e-11	0.976687	0.892037
CALU	2.36739e-09	-0.122123	0.093	0.158	6.61447e-05	0.625083	0.540434
PLEKHA2	1.2083e-09	-0.12205	0.089	0.154	3.37598e-05	0.608964	0.524366
RPL22	4.8298e-09	-0.121863	0.174	0.264	0.000134945	0.98569	0.90122
IGKC	1.3791e-07	-0.12181	0.116	0.183	0.0038532	0.8656	0.781168
ATXN1	8.38471e-15	-0.120706	0.115	0.211	2.34269e-10	0.753495	0.669828
FPGS	1.05806e-07	-0.119929	0.061	0.108	0.00295622	0.497366	0.414238
GRIPAP1	1.46864e-06	-0.119912	0.135	0.197	0.0410338	0.857463	0.774346
SMAD7	1.57683e-11	-0.119114	0.075	0.141	4.40565e-07	0.577068	0.494505
REV3L	1.78869e-06	-0.117851	0.351	0.457	0.0499759	1.72532	1.64363
FDPS	2.33119e-12	-0.117521	0.176	0.283	6.51333e-08	1.01747	0.936009
RPL37A	2.01062e-10	-0.117498	0.16	0.254	5.61768e-06	0.944979	0.863536
NDFIP1	2.73028e-09	-0.117471	0.074	0.131	7.6284e-05	0.484332	0.402907
RICTOR	8.95784e-07	-0.117338	0.155	0.225	0.0250282	0.872304	0.790971
SMAD3	5.90589e-08	-0.117337	0.109	0.172	0.00165011	0.734467	0.653135
YWHAB	1.24029e-08	-0.11682	0.159	0.241	0.000346536	0.911845	0.830872
CBX5	1.06226e-10	-0.116809	0.131	0.216	2.96795e-06	0.785421	0.704455
SCAMP4	1.06222e-08	-0.116711	0.113	0.181	0.000296783	0.747693	0.666795
IQCA1	1.13915e-11	-0.116563	0.067	0.13	3.18279e-07	0.512003	0.431207
PPA1	1.27341e-08	-0.116528	0.111	0.179	0.00035579	0.728227	0.647457
FBXO7	2.7952e-12	-0.116258	0.095	0.172	7.80978e-08	0.643154	0.562571
RPL3	2.28077e-10	-0.115375	0.159	0.252	6.37248e-06	0.98323	0.903258
RPL7A	3.88124e-08	-0.114942	0.134	0.206	0.00108442	0.832792	0.75312
TBC1D16	3.04512e-14	-0.114325	0.073	0.147	8.50806e-10	0.562625	0.483381
SLC41A2	3.15775e-10	-0.113929	0.051	0.102	8.82276e-06	0.385281	0.306312
NXF1	1.29546e-08	-0.113825	0.056	0.105	0.000361951	0.487781	0.408883
PGK1	1.1617e-09	-0.113766	0.067	0.124	3.24578e-05	0.492047	0.41319
CAPZA1	2.61413e-08	-0.113529	0.115	0.183	0.000730389	0.671436	0.592744
ATP5F1E	6.46585e-16	-0.113494	0.076	0.158	1.80656e-11	0.587625	0.508957
MBOAT7	1.08056e-07	-0.113382	0.071	0.121	0.00301909	0.496892	0.418301
LITAF	8.84681e-13	-0.113079	0.068	0.136	2.4718e-08	0.507959	0.429579
TMBIM6	1.53009e-10	-0.112996	0.122	0.204	4.27506e-06	0.746929	0.668606
HLA-F	9.74254e-13	-0.112002	0.063	0.129	2.72207e-08	0.457947	0.380313
TMSB10	1.24947e-10	-0.111916	0.156	0.249	3.49103e-06	0.962977	0.885403
ZFP36L1	8.04907e-07	-0.111676	0.338	0.443	0.0224891	1.85063	1.77322
GOLGA3	6.88531e-09	-0.111557	0.181	0.271	0.000192376	1.05361	0.976289
COX20	1.31144e-11	-0.111525	0.113	0.196	3.66418e-07	0.687667	0.610364
NTPCR	2.62366e-11	-0.1114	0.063	0.124	7.33051e-07	0.456683	0.379466
FAM13B	2.67694e-10	-0.111189	0.133	0.217	7.47938e-06	0.839764	0.762694
ZFAND3	2.76412e-07	-0.110694	0.06	0.105	0.00772296	0.458284	0.381556
BSDC1	2.47887e-08	-0.110658	0.147	0.224	0.000692596	0.864001	0.787299
ELK4	5.01748e-12	-0.110129	0.168	0.271	1.40188e-07	0.932006	0.85567
RPL39	5.15715e-10	-0.109909	0.102	0.173	1.44091e-05	0.725547	0.649365
ZNF138	9.57019e-10	-0.109806	0.05	0.1	2.67391e-05	0.34547	0.269358
VASP	7.37922e-09	-0.109549	0.079	0.137	0.000206176	0.594321	0.518387
TMED10	3.91819e-10	-0.109095	0.058	0.113	1.09474e-05	0.419006	0.343388
PPP4R2	3.22463e-07	-0.108974	0.136	0.205	0.00900961	0.805863	0.730328
UBE2V1	1.2323e-06	-0.108961	0.102	0.157	0.0344306	0.618259	0.542733
HMGA2	7.15126e-09	-0.10885	0.054	0.102	0.000199806	0.413621	0.338172
RBM12	1.80632e-08	-0.108754	0.079	0.136	0.000504686	0.524191	0.448808
UBAP2	1.223e-06	-0.108507	0.178	0.252	0.0341708	1.00228	0.927074
BZW1	7.03953e-08	-0.108425	0.06	0.108	0.00196684	0.426902	0.351748
UBR5	3.16859e-09	-0.108265	0.232	0.339	8.85305e-05	1.2232	1.14816
DIP2C	1.35455e-08	-0.108183	0.079	0.137	0.000378461	0.5871	0.512114
DDIT4	2.89851e-08	-0.108007	0.063	0.112	0.000809843	0.561496	0.486631
NRIP1	8.78149e-07	-0.107903	0.182	0.258	0.0245355	1.01731	0.942518
CACHD1	1.07445e-13	-0.106757	0.064	0.133	3.00201e-09	0.512924	0.438926
MINDY4	1.46721e-13	-0.106652	0.089	0.168	4.0994e-09	0.616974	0.543048
WDR82	1.01143e-06	-0.105937	0.128	0.19	0.0282594	0.783896	0.710466
CCT5	4.72837e-09	-0.105874	0.084	0.144	0.000132111	0.587067	0.513681
ITSN2	2.62671e-07	-0.105756	0.217	0.306	0.00733903	1.20979	1.13648
BAZ1A	5.51218e-08	-0.105721	0.225	0.321	0.0015401	1.23175	1.15847
HECTD2	6.26718e-09	-0.105486	0.054	0.103	0.000175105	0.41723	0.344113
IGFBP4	7.1456e-12	-0.105312	0.098	0.176	1.99648e-07	0.713648	0.640651
AC005332.6	9.29501e-10	-0.103928	0.052	0.103	2.59703e-05	0.389497	0.317459
PURB	1.83965e-09	-0.103566	0.119	0.194	5.13998e-05	0.698975	0.627189
SMYD2	1.16223e-15	-0.10243	0.044	0.108	3.24726e-11	0.354357	0.283357
LINC02591	8.19074e-18	-0.102304	0.077	0.165	2.28849e-13	0.53557	0.464659
OTUD7B	1.13157e-11	-0.102268	0.088	0.161	3.16161e-07	0.592922	0.522035
ARID5B	3.7363e-07	-0.102146	0.18	0.257	0.0104392	1.07571	1.00491
ITPRIPL2	3.02517e-08	-0.102078	0.087	0.145	0.000845231	0.571795	0.501039
PLCB4	1.06025e-07	-0.101252	0.154	0.23	0.00296233	0.982603	0.91242
ZNF124	8.36569e-13	-0.100716	0.058	0.121	2.33737e-08	0.418735	0.348924
NAP1L1	1.23471e-06	-0.0999241	0.155	0.225	0.0344978	0.912216	0.842954
STAG2	8.72037e-07	-0.0998964	0.11	0.169	0.0243647	0.728579	0.659336
ACSL4	4.50889e-12	-0.0995226	0.077	0.147	1.25978e-07	0.589246	0.520262
MTHFD2L	8.14688e-10	-0.099479	0.084	0.148	2.27624e-05	0.514721	0.445767
EHBP1L1	6.43682e-07	-0.0989186	0.104	0.161	0.0179845	0.735184	0.666619
MAPK6	2.49982e-10	-0.0987946	0.049	0.101	6.9845e-06	0.400718	0.332239
RPL9	2.77918e-08	-0.0987224	0.122	0.191	0.000776504	0.769125	0.700696
PTTG1IP	6.6756e-10	-0.0980388	0.126	0.205	1.86516e-05	0.788145	0.720189
SSBP3	1.97605e-08	-0.0975798	0.083	0.14	0.000552108	0.593799	0.526162
COBL	1.64714e-07	-0.0975571	0.217	0.304	0.0046021	1.19126	1.12364
AHCTF1	1.53893e-08	-0.0973606	0.134	0.209	0.000429976	0.85818	0.790695
CCDC57	5.89483e-07	-0.097269	0.185	0.264	0.0164702	1.03658	0.969154
NCOR2	2.32809e-11	-0.0971496	0.16	0.257	6.50467e-07	0.995467	0.928128
ZFAND6	2.03185e-09	-0.0967639	0.085	0.148	5.67698e-05	0.579713	0.512641
HDLBP	3.64841e-08	-0.0967561	0.185	0.273	0.00101937	1.05001	0.98294
CDC14B	2.37308e-09	-0.0964701	0.056	0.108	6.63039e-05	0.404621	0.337753
LINC01725	3.07799e-11	-0.0963925	0.047	0.1	8.5999e-07	0.338448	0.271633
EML2	2.97228e-11	-0.0962744	0.058	0.116	8.30456e-07	0.448232	0.3815
MTHFR	4.36167e-11	-0.095255	0.104	0.181	1.21865e-06	0.729437	0.663412
PLCH1	1.78135e-07	-0.0947411	0.057	0.102	0.00497709	0.449057	0.383387
PTBP2	1.12701e-06	-0.0945248	0.101	0.157	0.0314887	0.629408	0.563888
ALPK1	2.63971e-09	-0.0943991	0.116	0.19	7.37535e-05	0.718343	0.65291
SCNN1G	2.18874e-08	-0.0941864	0.071	0.125	0.000611534	0.569284	0.503999
UBAP2L	6.67501e-09	-0.093944	0.1	0.165	0.0001865	0.670187	0.60507
UBE4B	1.34905e-08	-0.0936638	0.066	0.118	0.000376926	0.485707	0.420785
TECR	6.1371e-12	-0.0931426	0.074	0.142	1.71471e-07	0.568398	0.503836
CSDE1	3.99833e-07	-0.0931022	0.13	0.195	0.0111713	0.780572	0.716038
PNRC2	3.74009e-07	-0.0930972	0.08	0.132	0.0104498	0.55282	0.48829
RCN1	7.31804e-09	-0.0929037	0.057	0.107	0.000204466	0.428662	0.364266
PRRC2B	3.7704e-07	-0.092747	0.285	0.388	0.0105345	1.40327	1.33899
FZD6	3.81568e-09	-0.0927254	0.059	0.111	0.00010661	0.430584	0.366312
SEPTIN2	1.94854e-07	-0.0923835	0.232	0.326	0.00544422	1.13785	1.07382
SLC25A29	1.18368e-12	-0.092218	0.343	0.503	3.30722e-08	1.75648	1.69256
EEF2	1.73914e-07	-0.0913701	0.116	0.18	0.00485916	0.752736	0.689403
KIF2A	3.18058e-08	-0.0913401	0.064	0.113	0.000888654	0.467244	0.403932
NUAK2	1.15772e-07	-0.0903541	0.057	0.102	0.00323466	0.451406	0.388777
CLASP1	3.51997e-09	-0.0902258	0.066	0.12	9.83479e-05	0.480225	0.417686
RCOR1	2.93076e-11	-0.089414	0.07	0.133	8.18855e-07	0.48876	0.426783
LINC-PINT	1.15172e-08	-0.0889776	0.235	0.338	0.000321792	1.2692	1.20753
KDM4B	1.1662e-11	-0.0886565	0.163	0.264	3.25836e-07	1.04247	0.981018
NRXN3	1.40954e-08	-0.0886289	0.088	0.148	0.000393826	0.582534	0.521101
HOXB4	3.82347e-09	-0.0880417	0.079	0.138	0.000106828	0.522164	0.461138
PLXDC2	1.12062e-06	-0.0880181	0.09	0.142	0.0313103	0.612361	0.551352
C3	2.84996e-11	-0.0874328	0.192	0.3	7.9628e-07	1.21401	1.15341
PCNX2	1.13956e-11	-0.0867514	0.098	0.176	3.18394e-07	0.64611	0.585979
CSNK1G2	4.94789e-07	-0.0866769	0.149	0.22	0.0138244	0.885111	0.825031
MORF4L1	2.90131e-09	-0.0864855	0.123	0.197	8.10626e-05	0.713786	0.653839
ENTPD4	1.68012e-06	-0.0860144	0.132	0.195	0.0469424	0.795459	0.735838
ERBB4	3.31788e-10	-0.084746	0.053	0.105	9.27016e-06	0.417606	0.358864
LPGAT1	6.0146e-11	-0.0847447	0.167	0.264	1.68048e-06	0.91203	0.85329
MYO15B	2.41694e-09	-0.0845633	0.138	0.218	6.75294e-05	0.959192	0.900577
MT2A	6.83743e-07	-0.0842821	0.111	0.17	0.0191038	0.849033	0.790613
ARL5A	1.61377e-08	-0.0839532	0.091	0.153	0.000450886	0.55413	0.495938
ATP13A3	1.35377e-08	-0.0829175	0.192	0.282	0.000378244	1.05552	0.998045
NISCH	7.00205e-08	-0.0819829	0.119	0.186	0.00195637	0.772752	0.715926
TP53BP1	1.58217e-09	-0.0817273	0.167	0.256	4.42057e-05	1.00133	0.94468
RNF152	1.25062e-08	-0.0815952	0.061	0.112	0.000349422	0.428746	0.372189
RANGAP1	4.8553e-10	-0.081533	0.056	0.109	1.35657e-05	0.4481	0.391586
MED15	3.35928e-07	-0.0802712	0.101	0.16	0.00938583	0.699843	0.644204
ARID1A	6.46578e-07	-0.0797573	0.161	0.235	0.0180654	0.941197	0.885914
CD63	1.34754e-09	-0.0796485	0.072	0.131	3.76502e-05	0.503022	0.447814
AC087741.1	8.90641e-10	-0.0793956	0.063	0.119	2.48845e-05	0.4751	0.420067
HUWE1	6.74276e-07	-0.0793152	0.183	0.263	0.0188393	1.06624	1.01127
RYK	5.64388e-09	-0.0790642	0.106	0.176	0.00015769	0.653773	0.59897
ZNF107	1.45143e-07	-0.0771167	0.059	0.105	0.0040553	0.405267	0.351813
UBE2A	1.14996e-07	-0.0764005	0.059	0.105	0.003213	0.403509	0.350552
EMX2OS	1.13285e-13	-0.0758924	0.074	0.148	3.16519e-09	0.520965	0.46836
STAT2	1.89701e-07	-0.0755789	0.148	0.221	0.00530026	0.895283	0.842896
RPS18	5.48772e-08	-0.07541	0.142	0.216	0.00153327	0.857845	0.805575
RBPMS	1.26503e-09	-0.0753312	0.115	0.19	3.5345e-05	0.807886	0.75567
CD81	1.8067e-10	-0.0748341	0.093	0.165	5.04791e-06	0.618398	0.566527
ANKRD28	1.03912e-07	-0.0743117	0.155	0.231	0.00290331	0.896302	0.844793
NOTCH2NLA	9.57553e-16	-0.0739669	0.041	0.102	2.6754e-11	0.305505	0.254235
SOCS4	5.18134e-07	-0.073818	0.07	0.117	0.0144767	0.442609	0.391442
ICA1L	8.70628e-08	-0.0738026	0.056	0.101	0.00243253	0.425929	0.374773
UBQLN1	6.60022e-07	-0.0727188	0.088	0.141	0.018441	0.536638	0.486233
AC092683.1	1.70061e-09	-0.0727005	0.246	0.36	4.75151e-05	1.24226	1.19186
CAB39	6.71852e-08	-0.0726936	0.057	0.104	0.00187715	0.382807	0.332419
PDIA6	6.44064e-14	-0.0717175	0.068	0.14	1.79952e-09	0.493595	0.443884
IPO9	2.3984e-07	-0.0712254	0.131	0.199	0.00670114	0.767545	0.718175
PTGS1	6.31268e-11	-0.0704795	0.073	0.137	1.76376e-06	0.607128	0.558275
PPTC7	2.37488e-07	-0.0701789	0.06	0.106	0.00663541	0.410362	0.361717
VEZF1	4.50277e-09	-0.0700572	0.094	0.159	0.000125807	0.570843	0.522283
AP006248.4	9.7806e-10	-0.0693174	0.053	0.105	2.7327e-05	0.370869	0.322822
URB1	3.81966e-08	-0.0684747	0.123	0.193	0.00106721	0.742909	0.695446
PDIA3	2.22703e-10	-0.0683619	0.089	0.158	6.22232e-06	0.595998	0.548613
TMCO3	1.05073e-08	-0.0677457	0.074	0.129	0.000293573	0.505037	0.458079
FAM160B2	1.10731e-06	-0.0671731	0.112	0.17	0.0309384	0.681386	0.634825
LEPROT	7.20904e-08	-0.0662334	0.117	0.184	0.00201421	0.657244	0.611334
USP11	3.24253e-08	-0.0647515	0.056	0.103	0.000905963	0.434938	0.390056
AGO1	5.36322e-08	-0.0639386	0.07	0.122	0.00149848	0.469454	0.425135
WDR19	7.97931e-08	-0.0638929	0.07	0.121	0.00222942	0.51614	0.471853
ABI1	5.00815e-07	-0.0638339	0.106	0.165	0.0139928	0.645144	0.600898
C9orf72	2.46227e-10	-0.0633124	0.102	0.175	6.87958e-06	0.65597	0.612085
ZNF706	1.7265e-10	-0.0631472	0.08	0.145	4.82383e-06	0.502197	0.458427
CALR	5.78935e-09	-0.0631	0.063	0.115	0.000161754	0.442902	0.399164
GLG1	5.02346e-07	-0.0617081	0.178	0.26	0.0140355	0.975398	0.932625
CST3	1.18035e-09	-0.0604878	0.066	0.123	3.29791e-05	0.469773	0.427846
KAT6A	1.51514e-07	-0.059871	0.172	0.255	0.00423331	0.942552	0.901053
STK24	2.9584e-07	-0.0598443	0.148	0.22	0.00826577	0.854197	0.812717
SIK3	2.62829e-09	-0.0594948	0.133	0.212	7.34345e-05	0.771017	0.729778
EFCAB2	5.51882e-10	-0.0589304	0.052	0.104	1.54196e-05	0.375415	0.334567
CASP6	3.06688e-09	-0.058399	0.055	0.105	8.56888e-05	0.386006	0.345527
POU2F1	1.0623e-06	-0.057827	0.076	0.125	0.0296805	0.539289	0.499207
RAB14	4.79798e-07	-0.057703	0.08	0.131	0.0134056	0.535475	0.495478
ETNK1	1.46577e-06	-0.0561325	0.171	0.249	0.0409535	0.864513	0.825605
ABL2	1.45605e-09	-0.0559976	0.134	0.215	4.06819e-05	0.853896	0.815082
NUDC	6.94669e-07	-0.0558383	0.069	0.115	0.0194091	0.441712	0.403007
PRMT1	1.32082e-07	-0.0543869	0.083	0.137	0.00369036	0.566237	0.528539
RPS23	9.39425e-07	-0.0535028	0.107	0.166	0.0262475	0.676607	0.639521
AP1S2	7.53269e-07	-0.0529958	0.082	0.133	0.0210463	0.519759	0.483026
CYBA	1.74482e-06	-0.0523947	0.081	0.129	0.0487504	0.536528	0.500211
KLF13	1.14896e-09	-0.0522067	0.116	0.193	3.2102e-05	0.692079	0.655892
ID3	3.90435e-07	-0.0513016	0.062	0.108	0.0109087	0.443281	0.407721
KCTD20	1.28324e-06	-0.0509822	0.069	0.114	0.0358537	0.440465	0.405127
DNAJC3	1.3096e-07	-0.0504416	0.065	0.114	0.00365904	0.437337	0.402374
N4BP2	1.23362e-07	-0.049334	0.131	0.2	0.00344673	0.802795	0.768599
PTPN14	2.79727e-10	-0.0491408	0.134	0.218	7.81557e-06	0.819268	0.785206
RAPGEF2	9.03769e-07	-0.0457705	0.101	0.158	0.0252513	0.636745	0.60502
EHD4	9.21826e-07	-0.0456924	0.08	0.13	0.0257558	0.567903	0.536232
HIPK1	1.60904e-06	-0.0453647	0.111	0.168	0.0449565	0.684968	0.653524
AC009120.2	3.30447e-08	-0.0442273	0.076	0.132	0.00092327	0.459188	0.428532
ARPP19	6.39587e-09	-0.0441773	0.058	0.108	0.000178701	0.384276	0.353655
ZNF121	1.08677e-10	-0.0439485	0.118	0.2	3.03644e-06	0.67227	0.641807
FSBP	1.09463e-08	-0.0436862	0.056	0.105	0.000305841	0.363126	0.332845
TNKS2	5.29348e-07	-0.0428911	0.1	0.158	0.01479	0.619491	0.589761
IFI16	1.25219e-09	-0.042593	0.109	0.182	3.49862e-05	0.773278	0.743755
PGM3	4.62695e-07	-0.0422448	0.099	0.157	0.0129277	0.587097	0.557815
DHX9	6.08991e-07	-0.0417303	0.129	0.193	0.0170152	0.762047	0.733121
H3F3B	4.50339e-07	-0.041335	0.235	0.329	0.0125825	1.24294	1.21429
SMIM14	3.04964e-09	-0.0411457	0.067	0.123	8.52069e-05	0.4533	0.42478
SERPINB6	2.99331e-07	-0.0410283	0.166	0.244	0.0083633	0.921411	0.892972
IFT43	1.89755e-09	-0.0408783	0.058	0.111	5.30176e-05	0.394662	0.366327
SREBF1	5.2604e-08	-0.0407054	0.13	0.203	0.00146976	0.77128	0.743065
SUB1	1.15188e-06	-0.0399846	0.084	0.134	0.0321836	0.517864	0.490149
SLC6A6	2.54837e-08	-0.039584	0.079	0.135	0.000712015	0.557867	0.530429
RASAL2	2.18915e-10	-0.0393166	0.102	0.176	6.11648e-06	0.632185	0.604932
OTUD4	4.54088e-07	-0.038897	0.099	0.157	0.0126872	0.603696	0.576735
DOT1L	7.86617e-08	-0.0381817	0.096	0.156	0.00219781	0.648006	0.62154
RNF115	8.56791e-09	-0.0359414	0.144	0.225	0.000239388	0.819929	0.795016
SLC39A8	1.26106e-07	-0.0351562	0.055	0.1	0.0035234	0.385824	0.361456
BHLHE41	5.43527e-08	-0.0346251	0.058	0.105	0.00151861	0.426554	0.402554
RPS6KC1	1.59817e-06	-0.0341941	0.058	0.1	0.044653	0.389214	0.365512
RFX3	9.27175e-09	-0.034141	0.071	0.126	0.000259053	0.441716	0.418052
DPY19L2	1.69753e-08	-0.0341124	0.065	0.118	0.000474289	0.415349	0.391704
CNKSR3	2.71153e-07	-0.0330658	0.155	0.228	0.00757601	0.989444	0.966524
CANX	3.67956e-08	-0.0315593	0.133	0.207	0.00102807	0.740981	0.719106
OAZ1	1.14357e-07	-0.0311819	0.07	0.121	0.00319513	0.442044	0.42043
DENND4A	7.18664e-07	-0.0307488	0.093	0.147	0.0200795	0.591146	0.569832
EIF1	5.32107e-07	-0.0301232	0.192	0.276	0.0148671	1.02645	1.00557
CACUL1	1.43933e-08	-0.0293115	0.138	0.217	0.00040215	0.747159	0.726842
ADAR	1.04218e-07	-0.0277343	0.211	0.305	0.00291184	1.10168	1.08246
PAK1	6.45886e-07	-0.0276388	0.07	0.118	0.0180461	0.46306	0.443902
IST1	8.755e-07	-0.0234564	0.139	0.206	0.0244615	0.808378	0.792119
HIBCH	8.16599e-07	-0.0216743	0.191	0.273	0.0228158	1.00217	0.987147
AC083862.3	6.67286e-14	-0.0214637	0.185	0.305	1.8644e-09	1.2957	1.28082
KALRN	2.03206e-07	-0.0211414	0.063	0.111	0.00567757	0.429458	0.414803
TSPAN14	5.39573e-08	-0.0207604	0.158	0.239	0.00150757	0.91474	0.90035
Z83843.1	2.61612e-08	-0.0189624	0.176	0.265	0.000730943	0.874495	0.861351
HDGFL3	2.39008e-07	-0.0158804	0.076	0.127	0.00667789	0.462598	0.451591
PLEKHA1	1.20467e-07	-0.0139832	0.24	0.341	0.00336585	1.24396	1.23427
RHPN2	9.32276e-07	-0.0138343	0.098	0.154	0.0260478	0.57979	0.570201
AC092279.1	1.75289e-07	-0.0128181	0.137	0.21	0.00489757	0.772957	0.764072
RO60	1.05673e-09	-0.0116469	0.09	0.157	2.9525e-05	0.510819	0.502746
LINC00513	1.29213e-06	-0.0107354	0.093	0.146	0.0361021	0.558316	0.550875
DENND1B	1.09842e-06	-0.0101377	0.096	0.153	0.0306899	0.530783	0.523756
KCNC4	1.00973e-06	-0.00985127	0.218	0.304	0.0282118	1.23043	1.2236
CCNC	5.22292e-09	-0.00854144	0.088	0.151	0.000145928	0.527647	0.521726
CHTOP	1.12837e-06	-0.00431096	0.132	0.198	0.0315267	0.707256	0.704268
KCNMA1	1.33819e-10	-0.0037423	0.191	0.297	3.7389e-06	1.12865	1.12606
YIPF6	1.2828e-06	-0.00313397	0.073	0.121	0.0358413	0.447104	0.444932
SPTLC2	4.6623e-10	0.000896279	0.086	0.153	1.30265e-05	0.568279	0.5689
LGR5	2.14025e-08	0.00109482	0.133	0.209	0.000597986	0.80607	0.806829
RPL7	5.8291e-08	0.00304055	0.11	0.176	0.00162865	0.655472	0.65758
AC024230.1	4.14925e-09	0.00501026	0.164	0.255	0.00011593	0.976438	0.979911
SNX27	3.0923e-07	0.00525117	0.057	0.101	0.00863988	0.33948	0.34312
LMAN1	5.06156e-07	0.00544836	0.141	0.213	0.014142	0.768535	0.772311
SDHC	3.46464e-07	0.00955977	0.085	0.14	0.0096802	0.494603	0.501229
CCT3	6.85277e-08	0.0147724	0.086	0.144	0.00191466	0.520247	0.530486
ATF6	7.85917e-09	0.0161029	0.065	0.119	0.000219585	0.441241	0.452402
HSD17B12	1.01453e-06	0.0238438	0.105	0.164	0.0283459	0.598134	0.614661
HOMER2	3.36189e-10	0.0396951	0.184	0.289	9.39313e-06	1.05209	1.07961
ANO1	1.84991e-08	0.0651486	0.058	0.108	0.000516866	0.38134	0.426498
XIST	1.75815e-12	0.22447	0.945	0.932	4.91226e-08	3.78537	3.94096
MALAT1	1.81314e-27	0.234355	1	1	5.06591e-23	7.19064	7.35308
NANS	1.11055e-06	0.28105	0.117	0.069	0.0310288	0.534257	0.729066
TBC1D2B	1.30487e-07	0.29998	0.101	0.054	0.0036458	0.377128	0.585059
NOSTRIN	3.39816e-09	0.323504	0.118	0.06	9.49446e-05	0.544735	0.768971
ANKRD12	1.61439e-07	0.337771	0.516	0.483	0.00451062	1.8506	2.08473
POLR2J3	1.0865e-06	0.351899	0.52	0.503	0.0303569	1.78165	2.02557
PRPF4B	1.75939e-07	0.353424	0.484	0.461	0.00491572	1.65395	1.89893
SRSF5	2.37138e-08	0.353891	0.426	0.381	0.000662564	1.45958	1.70488
LRATD1	2.1921e-10	0.365935	0.105	0.047	6.12473e-06	0.359957	0.613604
ESF1	8.63606e-07	0.375863	0.191	0.136	0.0241292	0.731113	0.991641
TPCN1	1.06229e-06	0.381678	0.116	0.07	0.0296804	0.418324	0.682883
GGNBP2	9.40379e-07	0.38603	0.256	0.2	0.0262742	0.981571	1.24915
AKAP9	2.64108e-11	0.396638	0.639	0.623	7.37918e-07	2.19562	2.47055
BAIAP2L2	1.68708e-14	0.399893	0.135	0.055	4.71371e-10	0.50244	0.779624
TRPM4	6.85861e-09	0.401058	0.122	0.066	0.000191629	0.4485	0.726492
CHD9	9.29692e-08	0.401891	0.378	0.328	0.00259756	1.32416	1.60273
SYNE2	1.59939e-08	0.404992	0.734	0.732	0.000446869	2.77708	3.0578
KANK1	1.58407e-08	0.410731	0.114	0.061	0.00044259	0.381733	0.66643
C1orf131	1.17665e-06	0.411539	0.134	0.086	0.0328755	0.482456	0.767713
MPHOSPH8	3.22328e-08	0.414588	0.408	0.356	0.000900586	1.46088	1.74825
NAPEPLD	1.43238e-06	0.41949	0.127	0.082	0.0400208	0.424871	0.715639
MCTP2	1.24058e-06	0.429091	0.199	0.145	0.0346617	0.71636	1.01378
PKP2	9.95921e-08	0.429763	0.137	0.084	0.0027826	0.450128	0.748017
ENTPD5	1.17113e-06	0.430667	0.122	0.076	0.0327212	0.41111	0.709626
INSR	8.13188e-07	0.43183	0.152	0.1	0.0227205	0.586266	0.885588
DNMBP	6.1994e-09	0.435906	0.163	0.1	0.000173211	0.578816	0.880963
PDXDC1	7.84816e-07	0.437156	0.43	0.399	0.0219278	1.50881	1.81182
NME3	7.15114e-07	0.438613	0.115	0.069	0.0199803	0.374578	0.678601
DDX55	1.92145e-07	0.445944	0.118	0.069	0.00536852	0.378192	0.687297
FAM160A2	4.81277e-07	0.446374	0.136	0.087	0.0134469	0.465525	0.774928
EPN1	1.65555e-08	0.446783	0.175	0.113	0.00046256	0.678884	0.98857
TCEA3	4.0924e-15	0.447925	0.118	0.041	1.14342e-10	0.443627	0.754105
BDH1	9.21388e-10	0.448331	0.101	0.047	2.57436e-05	0.272302	0.583061
MRPS5	6.50447e-08	0.453111	0.228	0.165	0.00181735	0.809221	1.12329
SPPL2B	3.01334e-07	0.45796	0.247	0.192	0.00841928	0.915347	1.23278
CLN3	3.94371e-08	0.459548	0.127	0.074	0.00110187	0.436616	0.75515
TACC1	1.23838e-06	0.461026	0.302	0.251	0.0346004	1.10572	1.42528
C1orf21	4.64987e-09	0.467595	0.134	0.076	0.000129917	0.482827	0.806939
TMPRSS4	4.54627e-08	0.469653	0.187	0.124	0.00127023	0.692807	1.01835
ITPR2	3.803e-09	0.471449	0.191	0.122	0.000106256	0.777546	1.10433
AKR1A1	1.11512e-06	0.472016	0.13	0.083	0.0311564	0.378441	0.705618
GBA2	1.50424e-06	0.472693	0.172	0.122	0.0420286	0.6085	0.936146
PCSK5	8.84808e-13	0.475995	0.115	0.048	2.47215e-08	0.388534	0.718469
TAOK3	1.30205e-07	0.480574	0.193	0.135	0.00363793	0.681788	1.0149
GSTK1	1.7856e-07	0.494417	0.226	0.171	0.00498896	0.752536	1.09524
BCL2L15	8.66197e-15	0.505275	0.118	0.044	2.42015e-10	0.365379	0.715609
MLX	1.89071e-13	0.506598	0.114	0.045	5.28265e-09	0.290492	0.641639
PURA	1.85956e-11	0.507239	0.202	0.126	5.19561e-07	0.629354	0.980945
RHOBTB3	9.11235e-09	0.50801	0.129	0.073	0.000254599	0.403659	0.755785
GNPTAB	8.65051e-07	0.508121	0.135	0.088	0.0241695	0.412069	0.764271
CHPT1	1.13168e-13	0.509777	0.114	0.044	3.16192e-09	0.290809	0.644159
CFTR	1.76805e-13	0.512233	0.228	0.135	4.93994e-09	0.946541	1.30159
TTC14	7.61713e-07	0.513982	0.294	0.247	0.0212823	0.994055	1.35032
EPS8L3	1.53276e-18	0.515239	0.103	0.024	4.28252e-14	0.334493	0.691629
SH3D19	1.86672e-14	0.516259	0.181	0.094	5.21561e-10	0.599735	0.957579
LPCAT4	1.74272e-08	0.518794	0.125	0.07	0.000486915	0.385153	0.744754
ABO	4.29484e-13	0.525647	0.128	0.056	1.19998e-08	0.392098	0.756449
DGAT1	3.36483e-10	0.526128	0.132	0.069	9.40134e-06	0.440303	0.804987
PIK3R1	1.61356e-07	0.53213	0.205	0.149	0.0045083	0.711891	1.08074
TNFRSF14	1.5962e-15	0.542612	0.241	0.14	4.45977e-11	0.807339	1.18345
FOXP1	7.79167e-09	0.542935	0.428	0.39	0.000217699	1.46026	1.8366
CAST	2.10097e-13	0.543598	0.421	0.337	5.8701e-09	1.43387	1.81066
GAS6	1.01597e-06	0.543713	0.154	0.106	0.0283862	0.47564	0.852513
PRKAG2	3.55836e-11	0.543758	0.323	0.247	9.94205e-07	1.15284	1.52975
RASSF7	1.36308e-11	0.54379	0.211	0.132	3.80844e-07	0.670896	1.04782
SRSF10	6.15166e-13	0.546149	0.489	0.447	1.71877e-08	1.54852	1.92708
SPIRE2	8.56752e-10	0.554527	0.118	0.06	2.39377e-05	0.376677	0.761046
AL390719.2	6.3432e-08	0.554651	0.184	0.128	0.00177229	0.591413	0.975868
FKBP5	3.72228e-12	0.565555	0.181	0.101	1.04001e-07	0.643303	1.03532
SLC4A4	4.70327e-20	0.567836	0.123	0.033	1.31409e-15	0.427142	0.820736
NEO1	1.89145e-10	0.572011	0.159	0.092	5.28472e-06	0.453403	0.84989
SULT1A1	2.05632e-14	0.57416	0.12	0.046	5.74535e-10	0.359683	0.75766
TPM1	3.04298e-22	0.580277	0.483	0.356	8.50208e-18	1.73741	2.13963
AGR2	4.91796e-11	0.584374	0.103	0.045	1.37408e-06	0.226073	0.63113
ZRANB2	8.83948e-29	0.601133	0.66	0.581	2.46975e-24	2.03746	2.45414
RSRP1	7.50505e-23	0.601559	0.55	0.461	2.09691e-18	1.73467	2.15164
RAPGEF5	3.57082e-11	0.601595	0.146	0.078	9.97686e-07	0.428734	0.845728
TP53I3	4.709e-13	0.608069	0.13	0.059	1.31569e-08	0.354303	0.775784
PMM2	1.59058e-07	0.61195	0.185	0.133	0.00444407	0.528971	0.953142
MYB	9.91823e-22	0.615493	0.1	0.016	2.77115e-17	0.201016	0.627643
RGMB	8.02431e-14	0.620106	0.103	0.037	2.24199e-09	0.296804	0.726628
MYO19	1.04963e-06	0.622737	0.184	0.136	0.0293268	0.562702	0.99435
TMEM63A	6.72668e-09	0.628286	0.378	0.336	0.000187943	1.22465	1.66014
ZNF91	3.1537e-12	0.639828	0.318	0.245	8.81144e-08	0.962664	1.40616
PPARGC1B	3.05034e-13	0.641854	0.1	0.036	8.52264e-09	0.220008	0.664908
FN3K	1.06779e-14	0.644023	0.132	0.056	2.9834e-10	0.268944	0.715347
TLN2	1.41179e-14	0.650269	0.211	0.122	3.94454e-10	0.651026	1.10176
SLC44A4	1.50306e-14	0.655249	0.184	0.098	4.19954e-10	0.578064	1.03225
ATP10B	5.70543e-30	0.661906	0.154	0.031	1.5941e-25	0.489611	0.94841
SCN9A	1.59626e-23	0.679587	0.108	0.017	4.45995e-19	0.20159	0.672643
AKAP1	8.73623e-19	0.681776	0.23	0.123	2.4409e-14	0.689224	1.16179
EPHX2	7.13344e-29	0.683401	0.207	0.07	1.99308e-24	0.71066	1.18436
WNK4	2.30469e-21	0.68505	0.12	0.029	6.43931e-17	0.366283	0.841123
FRYL	1.88741e-14	0.692759	0.423	0.353	5.27343e-10	1.44633	1.92651
CDCA7	2.68745e-15	0.693451	0.143	0.06	7.50874e-11	0.502242	0.982905
ARHGAP44	6.88874e-14	0.693603	0.122	0.051	1.92472e-09	0.27843	0.759199
DNM2	7.32668e-16	0.694295	0.247	0.151	2.04708e-11	0.789739	1.27099
AK1	1.01012e-17	0.695322	0.13	0.044	2.82227e-13	0.505077	0.987038
SLC22A18	7.28552e-19	0.695732	0.15	0.056	2.03557e-14	0.454837	0.937082
TMEM161B-AS1	4.21774e-12	0.704398	0.309	0.236	1.17844e-07	0.982208	1.47046
PCSK7	3.89358e-15	0.704973	0.401	0.327	1.08787e-10	1.37476	1.86341
ACOT11	4.65094e-20	0.707756	0.267	0.152	1.29947e-15	0.790243	1.28082
AC009133.1	4.48449e-09	0.710282	0.129	0.073	0.000125297	0.321183	0.813513
VIL1	6.61325e-25	0.710472	0.123	0.023	1.84774e-20	0.297004	0.789466
HOXB9	1.43096e-17	0.717792	0.124	0.041	3.9981e-13	0.350109	0.847645
TXNIP	1.35333e-13	0.729866	0.257	0.168	3.78119e-09	0.914289	1.42019
LLGL2	2.66185e-14	0.730028	0.38	0.303	7.43721e-10	1.1631	1.66912
FERMT1	1.62766e-21	0.738658	0.113	0.026	4.54769e-17	0.167185	0.679184
MIR194-2HG	3.23058e-26	0.74545	0.113	0.016	9.02625e-22	0.179655	0.696362
FAM3D	7.51241e-29	0.75467	0.137	0.023	2.09897e-24	0.317991	0.841088
ESRRA	1.0236e-16	0.755402	0.172	0.083	2.85993e-12	0.419449	0.943053
SYTL2	6.18646e-31	0.76075	0.228	0.077	1.7285e-26	0.88676	1.41407
ABCC3	5.55115e-29	0.761678	0.39	0.235	1.55099e-24	1.24156	1.76951
PLCE1	1.12193e-26	0.780708	0.202	0.073	3.13469e-22	0.593265	1.13441
TMC5	6.91612e-22	0.789249	0.313	0.186	1.93237e-17	0.996118	1.54318
C15orf48	9.59846e-25	0.800955	0.13	0.029	2.68181e-20	0.288942	0.844121
ABR	9.94834e-22	0.815612	0.194	0.083	2.77957e-17	0.521521	1.08686
PCK1	1.3847e-19	0.855644	0.107	0.024	3.86886e-15	0.421993	1.01508
HNF1A-AS1	1.83986e-25	0.862054	0.313	0.177	5.14056e-21	0.990536	1.58807
CDH17	2.57914e-29	0.877648	0.13	0.02	7.20612e-25	0.197752	0.806092
AC254629.1	5.59528e-29	0.879421	0.13	0.02	1.56332e-24	0.237868	0.847436
POF1B	1.11954e-31	0.887357	0.142	0.022	3.12801e-27	0.26484	0.879908
ERN2	2.25276e-35	0.913212	0.186	0.04	6.2942e-31	0.499476	1.13247
TFCP2L1	1.22636e-31	0.920013	0.36	0.201	3.42645e-27	1.06956	1.70726
CCND2	1.19053e-29	0.929292	0.179	0.051	3.32634e-25	0.366742	1.01088
CKB	4.47632e-23	0.935899	0.187	0.074	1.25068e-18	0.631198	1.27991
AMN	8.06426e-32	0.950454	0.185	0.051	2.25315e-27	0.349154	1.00796
MUC4	3.99373e-47	0.982985	0.319	0.109	1.11585e-42	1.03474	1.71609
B3GALT5	9.49495e-25	0.987787	0.117	0.02	2.65289e-20	0.270076	0.954758
SATB2	1.43317e-31	0.990831	0.168	0.039	4.00427e-27	0.347583	1.03437
RNF43	2.6421e-33	0.995642	0.219	0.073	7.38204e-29	0.498906	1.18903
CDHR1	1.48168e-40	0.997811	0.195	0.037	4.1398e-36	0.464559	1.15619
CYP3A5	4.02302e-35	1.0265	0.199	0.051	1.12403e-30	0.552496	1.26401
TRABD2A	1.93434e-40	1.02652	0.195	0.037	5.40454e-36	0.481928	1.19346
PAEP	3.70009e-12	1.03315	0.159	0.085	1.0338e-07	0.827748	1.54387
NPIPB15	1.63785e-30	1.05799	0.235	0.096	4.57616e-26	0.497748	1.23109
WNK2	2.15764e-35	1.07213	0.24	0.083	6.02845e-31	0.598756	1.3419
PIGR	1.16902e-44	1.10633	0.264	0.076	3.26625e-40	0.744559	1.51141
SELENBP1	1.08212e-37	1.16563	0.209	0.054	3.02345e-33	0.607772	1.41573
NXPE4	1.26065e-48	1.18502	0.201	0.027	3.52226e-44	0.411207	1.2326
NXPE1	1.63243e-60	1.21067	0.282	0.054	4.56101e-56	0.871108	1.71028
MUC12	6.6969e-44	1.22395	0.255	0.069	1.87111e-39	0.993449	1.84183
MUC5B	3.06993e-36	1.24879	0.194	0.046	8.57739e-32	0.514601	1.3802
AC103702.2	4.01922e-67	1.26609	0.303	0.058	1.12297e-62	0.862223	1.73981
ATP2C2	2.46553e-60	1.48696	0.325	0.093	6.8887e-56	0.763514	1.79419
LGALS4	4.18155e-61	1.55109	0.231	0.025	1.16833e-56	0.362108	1.43724
