# Supplementary material for: Dienogest interrupts the chemokine signalling axis in endometriotic lesions with resistant signatures providing novel opportunities for personalised treatment.
Source: Research Square preprint supplement (doi:10.21203/rs.3.rs-8096027/v1), 2026-01-13
Supplement: Supplementary file 7 [file ae08dfa540cde74e34b2249d.xlsx]

## Sheet: Sheet1
Supplementary Table 4: DEG between treated and non-treated in lymphocytes
gene_ID	p_val	avg_log2FC	pct.1	pct.2	p_val_adj	mean_response_TRUE	mean_response_FALSE
FKBP5	4.18241e-26	-0.75389	0.195	0.346	1.16857e-21	1.90345	1.38089
SYNE2	9.19097e-16	-0.482112	0.524	0.623	2.56796e-11	2.78991	2.45574
IL7R	5.10473e-15	-0.667179	0.374	0.481	1.42626e-10	2.9361	2.47364
PLCG2	5.42251e-15	-0.637156	0.654	0.682	1.51505e-10	3.97695	3.53531
SC5D	2.56598e-13	-0.610013	0.077	0.152	7.16936e-09	1.1254	0.702572
CRYBG1	2.75664e-13	-0.656679	0.173	0.269	7.70205e-09	1.6588	1.20362
IL2RB	4.48669e-12	0.726159	0.184	0.097	1.25358e-07	0.841247	1.34458
SLC2A3	4.85144e-12	0.537507	0.332	0.223	1.35549e-07	1.49215	1.86472
RPS6	1.05625e-11	-0.76753	0.178	0.261	2.95116e-07	1.74145	1.20943
MTRNR2L8	2.82789e-11	-0.761381	0.183	0.271	7.90113e-07	1.7681	1.24035
CD247	1.01818e-10	0.531544	0.206	0.119	2.84479e-06	0.927474	1.29591
CD38	1.34636e-10	0.718671	0.109	0.046	3.76172e-06	0.375536	0.873681
CNOT6L	1.71382e-10	-0.504825	0.273	0.362	4.78843e-06	1.96757	1.61766
SRGAP3	2.08742e-10	0.763282	0.174	0.097	5.83225e-06	0.930711	1.45978
GNLY	6.982e-10	0.923312	0.346	0.261	1.95077e-05	2.98926	3.62925
SAMD3	2.53329e-09	0.37985	0.237	0.148	7.078e-05	1.21307	1.47636
ZFP36L2	3.10817e-09	-0.346984	0.519	0.591	8.68422e-05	2.67851	2.438
ACAP1	6.4695e-09	0.387224	0.358	0.261	0.000180758	1.54341	1.81181
PFKFB3	7.32005e-09	-0.491851	0.074	0.129	0.000204522	0.958232	0.617307
ITGAL	1.15076e-08	0.435641	0.222	0.142	0.000321523	1.02262	1.32458
SMCHD1	1.21255e-08	-0.427318	0.479	0.544	0.000338785	2.53951	2.24332
AHNAK	1.23382e-08	-0.465555	0.396	0.469	0.00034473	2.3911	2.0684
NRDC	1.24226e-08	0.362563	0.208	0.128	0.000347087	1.02784	1.27915
PILRB	1.344e-08	0.483548	0.205	0.128	0.000375515	0.976397	1.31157
UBA52	2.0765e-08	-0.506355	0.088	0.146	0.000580174	1.01046	0.659481
GPR171	2.29824e-08	-0.571956	0.116	0.179	0.000642128	1.26058	0.86413
NCAM1	3.18339e-08	0.569877	0.12	0.062	0.00088944	0.703292	1.0983
RPL13A	3.43887e-08	-0.482446	0.233	0.304	0.00096082	1.76329	1.42888
COTL1	4.21177e-08	0.562065	0.187	0.117	0.00117677	0.990129	1.37972
GZMA	5.62497e-08	0.557373	0.163	0.097	0.00157162	0.857528	1.24387
MT-CO1	7.25069e-08	0.275299	0.949	0.948	0.00202584	4.87026	5.06108
RPL27A	8.01457e-08	-0.52691	0.11	0.169	0.00223927	1.11703	0.751806
RCSD1	1.04033e-07	0.207832	0.247	0.163	0.00290669	1.24814	1.3922
ITGAX	1.58081e-07	0.597736	0.163	0.099	0.0044168	1.16468	1.579
NIBAN1	1.59518e-07	-0.532217	0.156	0.218	0.00445694	1.47625	1.10735
NR4A2	1.75705e-07	0.581692	0.195	0.128	0.0049092	1.08303	1.48623
KANSL1	2.20461e-07	0.303796	0.396	0.305	0.00615968	1.67107	1.88165
HSPA1B	2.6867e-07	0.590789	0.203	0.136	0.00750665	1.25949	1.66899
RPL13	2.95882e-07	-0.561383	0.338	0.398	0.00826695	2.26197	1.87285
HSH2D	3.18234e-07	0.48002	0.119	0.065	0.00889146	0.611769	0.944493
DGKZ	3.45775e-07	0.436122	0.137	0.079	0.00966095	0.658441	0.960738
SYNRG	3.81418e-07	0.34692	0.317	0.235	0.0106568	1.39625	1.63671
RPL39	3.93928e-07	-0.491062	0.175	0.238	0.0110064	1.52681	1.18644
RPL32	4.59356e-07	-0.39026	0.181	0.249	0.0128344	1.55424	1.28373
EVL	5.78808e-07	0.34501	0.514	0.422	0.0161719	2.11214	2.35128
LIMD2	6.51552e-07	0.353575	0.181	0.115	0.0182044	0.86848	1.11356
LINC-PINT	9.24072e-07	-0.443569	0.305	0.369	0.0258186	1.98725	1.67979
SMAP2	9.88769e-07	-0.406478	0.154	0.216	0.0276262	1.36555	1.0838
FAM49B	1.08847e-06	0.329923	0.18	0.116	0.0304118	0.874084	1.10277
BTG1	1.50496e-06	-0.248188	0.468	0.544	0.0420486	2.48108	2.30905
MT-ATP6	1.54632e-06	0.32165	0.92	0.896	0.0432042	4.43462	4.65757
TXNIP	1.68591e-06	-0.391872	0.378	0.441	0.0471044	2.35459	2.08296
RAB8B	1.73605e-06	0.361589	0.109	0.06	0.0485052	0.454091	0.704725
