# Supplementary material for: Dienogest interrupts the chemokine signalling axis in endometriotic lesions with resistant signatures providing novel opportunities for personalised treatment.
Source: Research Square preprint supplement (doi:10.21203/rs.3.rs-8096027/v1), 2026-01-13
Supplement: Supplementary file 8 [file daac9f19bd1395056e258762.xlsx]

## Sheet: Sheet1
Supplementary Table 11: Ligand-recetor interactions and their occurrence in each sample.
	ID	ligand	source	receptor	target	untreated	responder	non_responder	treated	p_untreated	p_responders	p_non_responders	p_treated	p_fischer_responders
1912	CXCL12--myeloid--SDC4--epithelial	CXCL12	myeloid	SDC4	epithelial	4	11	1	12	36.3636	84.6154	10	52.1739	0.000644194
1935	EFEMP1--stromal--EGFR--epithelial	EFEMP1	stromal	EGFR	epithelial	4	9	0	9	36.3636	69.2308	0	39.1304	0.00160305
1762	TNC--endothelial--SDC4--epithelial	TNC	endothelial	SDC4	epithelial	1	7	0	7	9.09091	53.8462	0	30.4348	0.00748908
2240	THBS1--epithelial--SDC4--epithelial	THBS1	epithelial	SDC4	epithelial	1	7	0	7	9.09091	53.8462	0	30.4348	0.00748908
1061	CCN1--endothelial--SDC4--epithelial	CCN1	endothelial	SDC4	epithelial	5	9	1	10	45.4545	69.2308	10	43.4783	0.00968213
1676	CXCL12--lymphocyte--SDC4--epithelial	CXCL12	lymphocyte	SDC4	epithelial	3	9	1	10	27.2727	69.2308	10	43.4783	0.00968213
2429	TNC--stromal--PTPRB--stromal	TNC	stromal	PTPRB	stromal	3	9	1	10	27.2727	69.2308	10	43.4783	0.00968213
854	PSAP--stromal--AR--stromal	PSAP	stromal	AR	stromal	6	10	2	12	54.5455	76.9231	20	52.1739	0.0122781
892	FGF9--epithelial--FGFR1--endothelial	FGF9	epithelial	FGFR1	endothelial	4	10	2	12	36.3636	76.9231	20	52.1739	0.0122781
1463	RSPO3--epithelial--SDC4--epithelial	RSPO3	epithelial	SDC4	epithelial	4	10	2	12	36.3636	76.9231	20	52.1739	0.0122781
1590	RSPO3--myeloid--SDC4--epithelial	RSPO3	myeloid	SDC4	epithelial	5	10	2	12	45.4545	76.9231	20	52.1739	0.0122781
1623	CCL5--stromal--SDC4--epithelial	CCL5	stromal	SDC4	epithelial	4	10	2	12	36.3636	76.9231	20	52.1739	0.0122781
860	CXCL12--endothelial--SDC4--epithelial	CXCL12	endothelial	SDC4	epithelial	9	11	3	14	81.8182	84.6154	30	60.8696	0.0130569
869	TFPI--endothelial--SDC4--epithelial	TFPI	endothelial	SDC4	epithelial	6	11	3	14	54.5455	84.6154	30	60.8696	0.0130569
1901	VEGFA--epithelial--EGFR--stromal	VEGFA	epithelial	EGFR	stromal	3	11	3	14	27.2727	84.6154	30	60.8696	0.0130569
1584	ADM--endothelial--ACKR3--myeloid	ADM	endothelial	ACKR3	myeloid	3	6	0	6	27.2727	46.1538	0	26.087	0.0190793
1603	CXCL12--endothelial--AVPR1A--stromal	CXCL12	endothelial	AVPR1A	stromal	8	6	0	6	72.7273	46.1538	0	26.087	0.0190793
1826	CXCL12--endothelial--SDC4--endothelial	CXCL12	endothelial	SDC4	endothelial	4	6	0	6	36.3636	46.1538	0	26.087	0.0190793
2295	THBS2--stromal--ITGA4--endothelial	THBS2	stromal	ITGA4	endothelial	3	6	0	6	27.2727	46.1538	0	26.087	0.0190793
2766	LILRB4--myeloid--LAIR1--endothelial	LILRB4	myeloid	LAIR1	endothelial	7	7	10	17	63.6364	53.8462	100	73.913	0.0190793
3669	S100A8--epithelial--TLR4--epithelial	S100A8	epithelial	TLR4	epithelial	0	0	4	4	0	0	40	17.3913	0.0237154
673	IGLC1--epithelial--FCGR2B--myeloid	IGLC1	epithelial	FCGR2B	myeloid	5	8	1	9	45.4545	61.5385	10	39.1304	0.028806
1116	CXCL12--endothelial--ACKR3--epithelial	CXCL12	endothelial	ACKR3	epithelial	5	8	1	9	45.4545	61.5385	10	39.1304	0.028806
1372	IL1B--endothelial--IL1R2--myeloid	IL1B	endothelial	IL1R2	myeloid	5	8	1	9	45.4545	61.5385	10	39.1304	0.028806
1677	VEGFA--epithelial--NRP2--endothelial	VEGFA	epithelial	NRP2	endothelial	2	8	1	9	18.1818	61.5385	10	39.1304	0.028806
1893	ADM--stromal--ACKR3--epithelial	ADM	stromal	ACKR3	epithelial	1	8	1	9	9.09091	61.5385	10	39.1304	0.028806
1913	TFPI--lymphocyte--SDC4--epithelial	TFPI	lymphocyte	SDC4	epithelial	2	8	1	9	18.1818	61.5385	10	39.1304	0.028806
2168	TNC--stromal--SDC4--endothelial	TNC	stromal	SDC4	endothelial	1	8	1	9	9.09091	61.5385	10	39.1304	0.028806
2403	TNC--stromal--ITGA2--lymphocyte	TNC	stromal	ITGA2	lymphocyte	4	8	1	9	36.3636	61.5385	10	39.1304	0.028806
3368	TNC--stromal--EGFR--epithelial	TNC	stromal	EGFR	epithelial	3	8	1	9	27.2727	61.5385	10	39.1304	0.028806
2060	LPL--myeloid--CD44--lymphocyte	LPL	myeloid	CD44	lymphocyte	6	5	9	14	54.5455	38.4615	90	60.8696	0.028806
2761	IGHG1--epithelial--FCGR2B--myeloid	IGHG1	epithelial	FCGR2B	myeloid	6	4	8	12	54.5455	30.7692	80	52.1739	0.0360748
1131	SORBS1--endothelial--INSR--endothelial	SORBS1	endothelial	INSR	endothelial	9	9	2	11	81.8182	69.2308	20	47.8261	0.0360748
1143	EDN1--endothelial--EDNRB--epithelial	EDN1	endothelial	EDNRB	epithelial	4	9	2	11	36.3636	69.2308	20	47.8261	0.0360748
1415	ANGPTL4--lymphocyte--SDC4--epithelial	ANGPTL4	lymphocyte	SDC4	epithelial	3	9	2	11	27.2727	69.2308	20	47.8261	0.0360748
1625	CCL5--myeloid--SDC4--epithelial	CCL5	myeloid	SDC4	epithelial	4	9	2	11	36.3636	69.2308	20	47.8261	0.0360748
1737	SORBS1--lymphocyte--INSR--endothelial	SORBS1	lymphocyte	INSR	endothelial	8	9	2	11	72.7273	69.2308	20	47.8261	0.0360748
1980	ANGPTL4--epithelial--SDC4--epithelial	ANGPTL4	epithelial	SDC4	epithelial	6	9	2	11	54.5455	69.2308	20	47.8261	0.0360748
2096	HAS2--epithelial--CD44--myeloid	HAS2	epithelial	CD44	myeloid	5	9	2	11	45.4545	69.2308	20	47.8261	0.0360748
2409	TNC--stromal--PTPRZ1--lymphocyte	TNC	stromal	PTPRZ1	lymphocyte	4	9	2	11	36.3636	69.2308	20	47.8261	0.0360748
2464	TNC--stromal--PTPRZ1--epithelial	TNC	stromal	PTPRZ1	epithelial	3	9	2	11	27.2727	69.2308	20	47.8261	0.0360748
2506	TIMP3--stromal--MET--endothelial	TIMP3	stromal	MET	endothelial	8	2	6	8	72.7273	15.3846	60	34.7826	0.0393054
2799	FGF2--stromal--NRP1--epithelial	FGF2	stromal	NRP1	epithelial	5	2	6	8	45.4545	15.3846	60	34.7826	0.0393054
670	FGF2--endothelial--FGFR2--epithelial	FGF2	endothelial	FGFR2	epithelial	9	11	4	15	81.8182	84.6154	40	65.2174	0.0393054
1069	CEACAM1--stromal--HAVCR2--lymphocyte	CEACAM1	stromal	HAVCR2	lymphocyte	5	11	4	15	45.4545	84.6154	40	65.2174	0.0393054
1575	HGF--myeloid--CD44--myeloid	HGF	myeloid	CD44	myeloid	8	11	4	15	72.7273	84.6154	40	65.2174	0.0393054
1578	APOE--myeloid--ABCA1--stromal	APOE	myeloid	ABCA1	stromal	5	11	4	15	45.4545	84.6154	40	65.2174	0.0393054
1921	VEGFA--myeloid--GRIN2B--myeloid	VEGFA	myeloid	GRIN2B	myeloid	8	11	4	15	72.7273	84.6154	40	65.2174	0.0393054
2020	DCN--stromal--EGFR--epithelial	DCN	stromal	EGFR	epithelial	6	11	4	15	54.5455	84.6154	40	65.2174	0.0393054
2110	C3--epithelial--NRP1--stromal	C3	epithelial	NRP1	stromal	6	11	4	15	54.5455	84.6154	40	65.2174	0.0393054
2266	TNC--stromal--ITGA2--stromal	TNC	stromal	ITGA2	stromal	7	11	4	15	63.6364	84.6154	40	65.2174	0.0393054
1203	PLTP--endothelial--ABCA1--myeloid	PLTP	endothelial	ABCA1	myeloid	8	10	3	13	72.7273	76.9231	30	56.5217	0.0396804
1440	VEGFA--myeloid--GRIN2B--endothelial	VEGFA	myeloid	GRIN2B	endothelial	8	10	3	13	72.7273	76.9231	30	56.5217	0.0396804
1861	EDN1--epithelial--EDNRB--myeloid	EDN1	epithelial	EDNRB	myeloid	3	10	3	13	27.2727	76.9231	30	56.5217	0.0396804
2348	TNC--stromal--PTPRZ1--endothelial	TNC	stromal	PTPRZ1	endothelial	5	10	3	13	45.4545	76.9231	30	56.5217	0.0396804
1478	C3--lymphocyte--NRP1--myeloid	C3	lymphocyte	NRP1	myeloid	0	5	0	5	0	38.4615	0	21.7391	0.0457369
1758	SPARC--endothelial--FGFR1--endothelial	SPARC	endothelial	FGFR1	endothelial	1	5	0	5	9.09091	38.4615	0	21.7391	0.0457369
2005	PDGFB--myeloid--PDGFRB--lymphocyte	PDGFB	myeloid	PDGFRB	lymphocyte	1	5	0	5	9.09091	38.4615	0	21.7391	0.0457369
2298	PTN--stromal--PTPRZ1--lymphocyte	PTN	stromal	PTPRZ1	lymphocyte	1	5	0	5	9.09091	38.4615	0	21.7391	0.0457369
2988	SLIT2--stromal--ROBO4--myeloid	SLIT2	stromal	ROBO4	myeloid	2	5	0	5	18.1818	38.4615	0	21.7391	0.0457369
3161	CXCL12--endothelial--AVPR1A--lymphocyte	CXCL12	endothelial	AVPR1A	lymphocyte	6	5	0	5	54.5455	38.4615	0	21.7391	0.0457369
3411	CXCL12--myeloid--ACKR3--epithelial	CXCL12	myeloid	ACKR3	epithelial	1	5	0	5	9.09091	38.4615	0	21.7391	0.0457369
3554	VEGFA--epithelial--NRP1--stromal	VEGFA	epithelial	NRP1	stromal	1	5	0	5	9.09091	38.4615	0	21.7391	0.0457369
2689	LRPAP1--myeloid--LDLR--epithelial	LRPAP1	myeloid	LDLR	epithelial	9	8	10	18	81.8182	61.5385	100	78.2609	0.0457369
496	PLAU--myeloid--ITGA3--stromal	PLAU	myeloid	ITGA3	stromal	6	12	5	17	54.5455	92.3077	50	73.913	0.051532
925	EDN1--epithelial--EDNRB--endothelial	EDN1	epithelial	EDNRB	endothelial	5	12	5	17	45.4545	92.3077	50	73.913	0.051532
1476	EDN1--epithelial--EDNRB--stromal	EDN1	epithelial	EDNRB	stromal	6	12	5	17	54.5455	92.3077	50	73.913	0.051532
1563	THBS2--endothelial--ITGA4--lymphocyte	THBS2	endothelial	ITGA4	lymphocyte	7	12	5	17	63.6364	92.3077	50	73.913	0.051532
2815	THBS1--stromal--SDC4--myeloid	THBS1	stromal	SDC4	myeloid	6	0	3	3	54.5455	0	30	13.0435	0.0677583
2825	LAMA4--myeloid--CD44--myeloid	LAMA4	myeloid	CD44	myeloid	4	0	3	3	36.3636	0	30	13.0435	0.0677583
2844	LAMB1--lymphocyte--CD44--myeloid	LAMB1	lymphocyte	CD44	myeloid	3	0	3	3	27.2727	0	30	13.0435	0.0677583
2875	PTN--epithelial--SDC4--stromal	PTN	epithelial	SDC4	stromal	1	0	3	3	9.09091	0	30	13.0435	0.0677583
3640	LAMC2--endothelial--CD44--lymphocyte	LAMC2	endothelial	CD44	lymphocyte	2	0	3	3	18.1818	0	30	13.0435	0.0677583
3668	CD14--epithelial--TLR4--epithelial	CD14	epithelial	TLR4	epithelial	0	0	3	3	0	0	30	13.0435	0.0677583
3704	IL1B--myeloid--IL1RAP--myeloid	IL1B	myeloid	IL1RAP	myeloid	4	0	3	3	36.3636	0	30	13.0435	0.0677583
3718	IL1B--epithelial--IL1RAP--myeloid	IL1B	epithelial	IL1RAP	myeloid	4	0	3	3	36.3636	0	30	13.0435	0.0677583
3720	IL1B--stromal--IL1RAP--myeloid	IL1B	stromal	IL1RAP	myeloid	2	0	3	3	18.1818	0	30	13.0435	0.0677583
3721	IL1B--lymphocyte--IL1RAP--myeloid	IL1B	lymphocyte	IL1RAP	myeloid	2	0	3	3	18.1818	0	30	13.0435	0.0677583
4253	CSF3--epithelial--CSF3R--endothelial	CSF3	epithelial	CSF3R	endothelial	1	0	3	3	9.09091	0	30	13.0435	0.0677583
571	TIMP3--epithelial--MET--epithelial	TIMP3	epithelial	MET	epithelial	10	13	7	20	90.9091	100	70	86.9565	0.0677583
1394	TIMP2--stromal--CD44--lymphocyte	TIMP2	stromal	CD44	lymphocyte	11	13	7	20	100	100	70	86.9565	0.0677583
1308	B2M--endothelial--TFRC--stromal	B2M	endothelial	TFRC	stromal	6	7	1	8	54.5455	53.8462	10	34.7826	0.0743034
1453	TAC1--myeloid--FAP--stromal	TAC1	myeloid	FAP	stromal	2	7	1	8	18.1818	53.8462	10	34.7826	0.0743034
1524	IL1B--epithelial--IL1RAP--epithelial	IL1B	epithelial	IL1RAP	epithelial	2	7	1	8	18.1818	53.8462	10	34.7826	0.0743034
1555	CCL5--endothelial--SDC4--epithelial	CCL5	endothelial	SDC4	epithelial	3	7	1	8	27.2727	53.8462	10	34.7826	0.0743034
1616	TAC1--lymphocyte--FAP--stromal	TAC1	lymphocyte	FAP	stromal	3	7	1	8	27.2727	53.8462	10	34.7826	0.0743034
1802	TNC--lymphocyte--SDC4--epithelial	TNC	lymphocyte	SDC4	epithelial	2	7	1	8	18.1818	53.8462	10	34.7826	0.0743034
1848	ADAM12--epithelial--SDC4--epithelial	ADAM12	epithelial	SDC4	epithelial	4	7	1	8	36.3636	53.8462	10	34.7826	0.0743034
1873	ICAM1--endothelial--CAV1--stromal	ICAM1	endothelial	CAV1	stromal	5	7	1	8	45.4545	53.8462	10	34.7826	0.0743034
1918	DCN--stromal--TLR2--lymphocyte	DCN	stromal	TLR2	lymphocyte	2	7	1	8	18.1818	53.8462	10	34.7826	0.0743034
1919	TFPI--epithelial--SDC4--epithelial	TFPI	epithelial	SDC4	epithelial	2	7	1	8	18.1818	53.8462	10	34.7826	0.0743034
1920	COL4A2--endothelial--CD93--epithelial	COL4A2	endothelial	CD93	epithelial	1	7	1	8	9.09091	53.8462	10	34.7826	0.0743034
1975	TNC--myeloid--SDC4--epithelial	TNC	myeloid	SDC4	epithelial	2	7	1	8	18.1818	53.8462	10	34.7826	0.0743034
2003	FGF2--myeloid--SDC4--epithelial	FGF2	myeloid	SDC4	epithelial	2	7	1	8	18.1818	53.8462	10	34.7826	0.0743034
2629	NAMPT--lymphocyte--INSR--endothelial	NAMPT	lymphocyte	INSR	endothelial	6	7	1	8	54.5455	53.8462	10	34.7826	0.0743034
2640	B2M--endothelial--LILRB1--stromal	B2M	endothelial	LILRB1	stromal	6	7	1	8	54.5455	53.8462	10	34.7826	0.0743034
2665	B2M--endothelial--LILRB1--lymphocyte	B2M	endothelial	LILRB1	lymphocyte	7	7	1	8	63.6364	53.8462	10	34.7826	0.0743034
3766	ADAM12--endothelial--SDC4--epithelial	ADAM12	endothelial	SDC4	epithelial	2	7	1	8	18.1818	53.8462	10	34.7826	0.0743034
3771	MDK--lymphocyte--SDC4--epithelial	MDK	lymphocyte	SDC4	epithelial	3	7	1	8	27.2727	53.8462	10	34.7826	0.0743034
1489	NAMPT--epithelial--INSR--endothelial	NAMPT	epithelial	INSR	endothelial	7	6	1	7	63.6364	46.1538	10	30.4348	0.0886208
1532	TGM2--myeloid--SDC4--epithelial	TGM2	myeloid	SDC4	epithelial	4	6	1	7	36.3636	46.1538	10	30.4348	0.0886208
1547	RARRES1--epithelial--NRP2--endothelial	RARRES1	epithelial	NRP2	endothelial	1	6	1	7	9.09091	46.1538	10	30.4348	0.0886208
1692	B2M--endothelial--LILRB1--epithelial	B2M	endothelial	LILRB1	epithelial	4	6	1	7	36.3636	46.1538	10	30.4348	0.0886208
1801	FGF2--lymphocyte--SDC4--epithelial	FGF2	lymphocyte	SDC4	epithelial	2	6	1	7	18.1818	46.1538	10	30.4348	0.0886208
1803	FGF2--endothelial--SDC4--epithelial	FGF2	endothelial	SDC4	epithelial	3	6	1	7	27.2727	46.1538	10	30.4348	0.0886208
1838	FGF2--epithelial--SDC4--epithelial	FGF2	epithelial	SDC4	epithelial	3	6	1	7	27.2727	46.1538	10	30.4348	0.0886208
1930	CCN4--myeloid--ITGA5--endothelial	CCN4	myeloid	ITGA5	endothelial	3	6	1	7	27.2727	46.1538	10	30.4348	0.0886208
1976	CCN4--endothelial--ITGA5--endothelial	CCN4	endothelial	ITGA5	endothelial	2	6	1	7	18.1818	46.1538	10	30.4348	0.0886208
2106	CCN2--epithelial--ITGA5--endothelial	CCN2	epithelial	ITGA5	endothelial	2	6	1	7	18.1818	46.1538	10	30.4348	0.0886208
2166	COL4A1--stromal--CD93--lymphocyte	COL4A1	stromal	CD93	lymphocyte	5	6	1	7	45.4545	46.1538	10	30.4348	0.0886208
2270	LPL--stromal--CD44--stromal	LPL	stromal	CD44	stromal	2	6	1	7	18.1818	46.1538	10	30.4348	0.0886208
2290	VEGFA--stromal--GRIN2B--myeloid	VEGFA	stromal	GRIN2B	myeloid	6	6	1	7	54.5455	46.1538	10	30.4348	0.0886208
2383	ANGPTL4--stromal--CDH5--epithelial	ANGPTL4	stromal	CDH5	epithelial	1	6	1	7	9.09091	46.1538	10	30.4348	0.0886208
2655	B2M--endothelial--KLRC1--stromal	B2M	endothelial	KLRC1	stromal	5	6	1	7	45.4545	46.1538	10	30.4348	0.0886208
2663	IL33--stromal--IL1RL1--myeloid	IL33	stromal	IL1RL1	myeloid	5	6	1	7	45.4545	46.1538	10	30.4348	0.0886208
2670	B2M--endothelial--CD3G--stromal	B2M	endothelial	CD3G	stromal	4	6	1	7	36.3636	46.1538	10	30.4348	0.0886208
2687	B2M--endothelial--KLRC2--stromal	B2M	endothelial	KLRC2	stromal	5	6	1	7	45.4545	46.1538	10	30.4348	0.0886208
2991	LGALS1--epithelial--PTPRC--myeloid	LGALS1	epithelial	PTPRC	myeloid	0	6	1	7	0	46.1538	10	30.4348	0.0886208
3003	COL4A4--stromal--CD47--myeloid	COL4A4	stromal	CD47	myeloid	2	6	1	7	18.1818	46.1538	10	30.4348	0.0886208
3014	ICAM1--endothelial--IL2RA--lymphocyte	ICAM1	endothelial	IL2RA	lymphocyte	4	6	1	7	36.3636	46.1538	10	30.4348	0.0886208
3342	PGF--epithelial--NRP1--stromal	PGF	epithelial	NRP1	stromal	4	6	1	7	36.3636	46.1538	10	30.4348	0.0886208
3768	MDK--myeloid--SDC4--epithelial	MDK	myeloid	SDC4	epithelial	5	6	1	7	45.4545	46.1538	10	30.4348	0.0886208
3770	TGM2--lymphocyte--SDC4--epithelial	TGM2	lymphocyte	SDC4	epithelial	3	6	1	7	27.2727	46.1538	10	30.4348	0.0886208
3773	ADAM12--myeloid--SDC4--epithelial	ADAM12	myeloid	SDC4	epithelial	2	6	1	7	18.1818	46.1538	10	30.4348	0.0886208
3836	ALCAM--epithelial--CD6--endothelial	ALCAM	epithelial	CD6	endothelial	3	6	1	7	27.2727	46.1538	10	30.4348	0.0886208
3842	C3--epithelial--ITGAX--endothelial	C3	epithelial	ITGAX	endothelial	1	6	1	7	9.09091	46.1538	10	30.4348	0.0886208
3865	CSF1--epithelial--CSF2RA--lymphocyte	CSF1	epithelial	CSF2RA	lymphocyte	1	6	1	7	9.09091	46.1538	10	30.4348	0.0886208
3867	CSF1--epithelial--CSF2RA--epithelial	CSF1	epithelial	CSF2RA	epithelial	1	6	1	7	9.09091	46.1538	10	30.4348	0.0886208
3869	CSF1--epithelial--CSF2RA--stromal	CSF1	epithelial	CSF2RA	stromal	1	6	1	7	9.09091	46.1538	10	30.4348	0.0886208
609	CD38--lymphocyte--PECAM1--epithelial	CD38	lymphocyte	PECAM1	epithelial	2	7	9	16	18.1818	53.8462	90	69.5652	0.0886208
1607	COL4A2--lymphocyte--CD93--myeloid	COL4A2	lymphocyte	CD93	myeloid	6	7	9	16	54.5455	53.8462	90	69.5652	0.0886208
2378	THBS1--stromal--CD36--myeloid	THBS1	stromal	CD36	myeloid	7	7	9	16	63.6364	53.8462	90	69.5652	0.0886208
2578	ECM1--stromal--ITGB4--endothelial	ECM1	stromal	ITGB4	endothelial	11	7	9	16	100	53.8462	90	69.5652	0.0886208
788	ADM--endothelial--RAMP1--stromal	ADM	endothelial	RAMP1	stromal	3	8	2	10	27.2727	61.5385	20	43.4783	0.0903025
915	ADM--myeloid--ACKR3--epithelial	ADM	myeloid	ACKR3	epithelial	4	8	2	10	36.3636	61.5385	20	43.4783	0.0903025
1359	ALCAM--lymphocyte--NRP1--myeloid	ALCAM	lymphocyte	NRP1	myeloid	0	8	2	10	0	61.5385	20	43.4783	0.0903025
1367	RSPO3--endothelial--SDC4--epithelial	RSPO3	endothelial	SDC4	epithelial	6	8	2	10	54.5455	61.5385	20	43.4783	0.0903025
1693	CXCL12--epithelial--SDC4--epithelial	CXCL12	epithelial	SDC4	epithelial	4	8	2	10	36.3636	61.5385	20	43.4783	0.0903025
1713	CCN1--epithelial--SDC4--epithelial	CCN1	epithelial	SDC4	epithelial	2	8	2	10	18.1818	61.5385	20	43.4783	0.0903025
1869	VEGFA--stromal--GRIN2B--endothelial	VEGFA	stromal	GRIN2B	endothelial	5	8	2	10	45.4545	61.5385	20	43.4783	0.0903025
2131	SELE--endothelial--CD44--endothelial	SELE	endothelial	CD44	endothelial	5	8	2	10	45.4545	61.5385	20	43.4783	0.0903025
2263	COL4A1--stromal--CD93--stromal	COL4A1	stromal	CD93	stromal	5	8	2	10	45.4545	61.5385	20	43.4783	0.0903025
2371	TNC--stromal--PTPRZ1--myeloid	TNC	stromal	PTPRZ1	myeloid	3	8	2	10	27.2727	61.5385	20	43.4783	0.0903025
2519	NLGN4X--stromal--NRXN1--stromal	NLGN4X	stromal	NRXN1	stromal	8	8	2	10	72.7273	61.5385	20	43.4783	0.0903025
3550	S100A4--lymphocyte--EGFR--epithelial	S100A4	lymphocyte	EGFR	epithelial	3	8	2	10	27.2727	61.5385	20	43.4783	0.0903025
3846	IL1B--epithelial--IL1RAP--stromal	IL1B	epithelial	IL1RAP	stromal	2	8	2	10	18.1818	61.5385	20	43.4783	0.0903025
2524	IGF1--stromal--ITGB4--endothelial	IGF1	stromal	ITGB4	endothelial	8	4	7	11	72.7273	30.7692	70	47.8261	0.0995327
2531	LAMA4--stromal--ITGB4--endothelial	LAMA4	stromal	ITGB4	endothelial	8	4	7	11	72.7273	30.7692	70	47.8261	0.0995327
2537	LAMB1--stromal--ITGB4--endothelial	LAMB1	stromal	ITGB4	endothelial	8	4	7	11	72.7273	30.7692	70	47.8261	0.0995327
974	PGF--epithelial--NRP1--myeloid	PGF	epithelial	NRP1	myeloid	1	9	3	12	9.09091	69.2308	30	52.1739	0.0995327
1115	CCN1--endothelial--ITGA5--endothelial	CCN1	endothelial	ITGA5	endothelial	5	9	3	12	45.4545	69.2308	30	52.1739	0.0995327
1272	CCN2--endothelial--ITGA5--endothelial	CCN2	endothelial	ITGA5	endothelial	4	9	3	12	36.3636	69.2308	30	52.1739	0.0995327
1293	ICAM1--endothelial--EGFR--stromal	ICAM1	endothelial	EGFR	stromal	8	9	3	12	72.7273	69.2308	30	52.1739	0.0995327
1307	IL1B--lymphocyte--IL1R2--myeloid	IL1B	lymphocyte	IL1R2	myeloid	5	9	3	12	45.4545	69.2308	30	52.1739	0.0995327
1487	COL3A1--stromal--DDR2--lymphocyte	COL3A1	stromal	DDR2	lymphocyte	6	9	3	12	54.5455	69.2308	30	52.1739	0.0995327
1490	PTN--lymphocyte--SDC4--epithelial	PTN	lymphocyte	SDC4	epithelial	4	9	3	12	36.3636	69.2308	30	52.1739	0.0995327
1509	TNC--epithelial--SDC4--epithelial	TNC	epithelial	SDC4	epithelial	3	9	3	12	27.2727	69.2308	30	52.1739	0.0995327
1683	ADM--epithelial--ACKR3--epithelial	ADM	epithelial	ACKR3	epithelial	4	9	3	12	36.3636	69.2308	30	52.1739	0.0995327
1685	EDN1--epithelial--EDNRB--epithelial	EDN1	epithelial	EDNRB	epithelial	3	9	3	12	27.2727	69.2308	30	52.1739	0.0995327
1718	ANGPTL4--endothelial--SDC4--epithelial	ANGPTL4	endothelial	SDC4	epithelial	6	9	3	12	54.5455	69.2308	30	52.1739	0.0995327
1944	EDN1--epithelial--ADGRL4--epithelial	EDN1	epithelial	ADGRL4	epithelial	2	9	3	12	18.1818	69.2308	30	52.1739	0.0995327
2068	IL1B--epithelial--IL1R2--lymphocyte	IL1B	epithelial	IL1R2	lymphocyte	0	9	3	12	0	69.2308	30	52.1739	0.0995327
2462	THBS1--stromal--ITGA6--lymphocyte	THBS1	stromal	ITGA6	lymphocyte	7	3	6	9	63.6364	23.0769	60	39.1304	0.102302
2579	SEMA5A--stromal--MET--endothelial	SEMA5A	stromal	MET	endothelial	8	3	6	9	72.7273	23.0769	60	39.1304	0.102302
2610	HGF--stromal--MET--endothelial	HGF	stromal	MET	endothelial	6	3	6	9	54.5455	23.0769	60	39.1304	0.102302
973	EDN1--endothelial--EDNRB--stromal	EDN1	endothelial	EDNRB	stromal	9	10	4	14	81.8182	76.9231	40	60.8696	0.102302
1212	THBS1--epithelial--CD47--epithelial	THBS1	epithelial	CD47	epithelial	5	10	4	14	45.4545	76.9231	40	60.8696	0.102302
1338	EFNA5--endothelial--EPHA7--stromal	EFNA5	endothelial	EPHA7	stromal	5	10	4	14	45.4545	76.9231	40	60.8696	0.102302
1347	VEGFA--lymphocyte--NRP2--epithelial	VEGFA	lymphocyte	NRP2	epithelial	7	10	4	14	63.6364	76.9231	40	60.8696	0.102302
1434	SORBS1--stromal--ITGA1--endothelial	SORBS1	stromal	ITGA1	endothelial	8	10	4	14	72.7273	76.9231	40	60.8696	0.102302
1619	FN1--epithelial--PLAUR--myeloid	FN1	epithelial	PLAUR	myeloid	7	10	4	14	63.6364	76.9231	40	60.8696	0.102302
1642	ICAM1--myeloid--CAV1--stromal	ICAM1	myeloid	CAV1	stromal	6	10	4	14	54.5455	76.9231	40	60.8696	0.102302
1768	APOE--myeloid--LDLR--stromal	APOE	myeloid	LDLR	stromal	4	10	4	14	36.3636	76.9231	40	60.8696	0.102302
1866	VEGFA--myeloid--GRIN2B--lymphocyte	VEGFA	myeloid	GRIN2B	lymphocyte	8	10	4	14	72.7273	76.9231	40	60.8696	0.102302
2182	VEGFA--myeloid--EGFR--epithelial	VEGFA	myeloid	EGFR	epithelial	6	10	4	14	54.5455	76.9231	40	60.8696	0.102302
1133	IGF1--stromal--IGF1R--endothelial	IGF1	stromal	IGF1R	endothelial	4	4	0	4	36.3636	30.7692	0	17.3913	0.104461
1219	HGF--endothelial--NRP1--myeloid	HGF	endothelial	NRP1	myeloid	1	4	0	4	9.09091	30.7692	0	17.3913	0.104461
1337	FGF2--lymphocyte--NRP1--myeloid	FGF2	lymphocyte	NRP1	myeloid	0	4	0	4	0	30.7692	0	17.3913	0.104461
1339	FGF2--endothelial--NRP1--myeloid	FGF2	endothelial	NRP1	myeloid	1	4	0	4	9.09091	30.7692	0	17.3913	0.104461
1368	FGF2--epithelial--NRP1--myeloid	FGF2	epithelial	NRP1	myeloid	1	4	0	4	9.09091	30.7692	0	17.3913	0.104461
1480	PSAP--epithelial--AR--stromal	PSAP	epithelial	AR	stromal	1	4	0	4	9.09091	30.7692	0	17.3913	0.104461
1568	SPON2--stromal--ITGA4--stromal	SPON2	stromal	ITGA4	stromal	1	4	0	4	9.09091	30.7692	0	17.3913	0.104461
1726	FGF7--epithelial--NRP1--myeloid	FGF7	epithelial	NRP1	myeloid	0	4	0	4	0	30.7692	0	17.3913	0.104461
1748	FGF7--lymphocyte--NRP1--myeloid	FGF7	lymphocyte	NRP1	myeloid	0	4	0	4	0	30.7692	0	17.3913	0.104461
1862	FGF7--endothelial--NRP1--myeloid	FGF7	endothelial	NRP1	myeloid	0	4	0	4	0	30.7692	0	17.3913	0.104461
1880	LAMA4--stromal--ITGB4--stromal	LAMA4	stromal	ITGB4	stromal	3	4	0	4	27.2727	30.7692	0	17.3913	0.104461
2087	VCAN--stromal--ITGA4--endothelial	VCAN	stromal	ITGA4	endothelial	1	4	0	4	9.09091	30.7692	0	17.3913	0.104461
2129	PDGFB--myeloid--PDGFRB--myeloid	PDGFB	myeloid	PDGFRB	myeloid	1	4	0	4	9.09091	30.7692	0	17.3913	0.104461
2158	CXCL12--lymphocyte--ITGA4--myeloid	CXCL12	lymphocyte	ITGA4	myeloid	0	4	0	4	0	30.7692	0	17.3913	0.104461
2248	PTN--stromal--PTPRZ1--myeloid	PTN	stromal	PTPRZ1	myeloid	1	4	0	4	9.09091	30.7692	0	17.3913	0.104461
2260	FGF7--epithelial--NRP1--endothelial	FGF7	epithelial	NRP1	endothelial	2	4	0	4	18.1818	30.7692	0	17.3913	0.104461
2269	FGF7--myeloid--NRP1--endothelial	FGF7	myeloid	NRP1	endothelial	2	4	0	4	18.1818	30.7692	0	17.3913	0.104461
2332	PTN--stromal--PTPRB--stromal	PTN	stromal	PTPRB	stromal	1	4	0	4	9.09091	30.7692	0	17.3913	0.104461
2335	SORBS1--endothelial--ITGA1--stromal	SORBS1	endothelial	ITGA1	stromal	1	4	0	4	9.09091	30.7692	0	17.3913	0.104461
2975	IL15--myeloid--IL2RA--lymphocyte	IL15	myeloid	IL2RA	lymphocyte	1	4	0	4	9.09091	30.7692	0	17.3913	0.104461
2984	GZMA--epithelial--F2R--endothelial	GZMA	epithelial	F2R	endothelial	1	4	0	4	9.09091	30.7692	0	17.3913	0.104461
3129	TNC--stromal--ITGA2--myeloid	TNC	stromal	ITGA2	myeloid	2	4	0	4	18.1818	30.7692	0	17.3913	0.104461
3150	CXCL12--endothelial--AVPR1A--myeloid	CXCL12	endothelial	AVPR1A	myeloid	6	4	0	4	54.5455	30.7692	0	17.3913	0.104461
3398	IL33--myeloid--IL1RL1--myeloid	IL33	myeloid	IL1RL1	myeloid	3	4	0	4	27.2727	30.7692	0	17.3913	0.104461
3544	NRG1--stromal--EGFR--epithelial	NRG1	stromal	EGFR	epithelial	2	4	0	4	18.1818	30.7692	0	17.3913	0.104461
3845	CEACAM1--endothelial--HAVCR2--endothelial	CEACAM1	endothelial	HAVCR2	endothelial	0	4	0	4	0	30.7692	0	17.3913	0.104461
3866	NCAM1--stromal--PTPRZ1--endothelial	NCAM1	stromal	PTPRZ1	endothelial	1	4	0	4	9.09091	30.7692	0	17.3913	0.104461
3932	CCL11--stromal--ACKR1--lymphocyte	CCL11	stromal	ACKR1	lymphocyte	2	4	0	4	18.1818	30.7692	0	17.3913	0.104461
3940	CCL14--lymphocyte--ACKR1--lymphocyte	CCL14	lymphocyte	ACKR1	lymphocyte	0	4	0	4	0	30.7692	0	17.3913	0.104461
3942	LAMB3--epithelial--ITGA6--stromal	LAMB3	epithelial	ITGA6	stromal	2	4	0	4	18.1818	30.7692	0	17.3913	0.104461
3944	LAMC2--epithelial--ITGA6--stromal	LAMC2	epithelial	ITGA6	stromal	2	4	0	4	18.1818	30.7692	0	17.3913	0.104461
3946	LAMA3--epithelial--ITGA6--stromal	LAMA3	epithelial	ITGA6	stromal	1	4	0	4	9.09091	30.7692	0	17.3913	0.104461
4017	TNFSF10--lymphocyte--TNFRSF11B--stromal	TNFSF10	lymphocyte	TNFRSF11B	stromal	0	4	0	4	0	30.7692	0	17.3913	0.104461
2836	LAMA4--lymphocyte--CD44--myeloid	LAMA4	lymphocyte	CD44	myeloid	3	1	4	5	27.2727	7.69231	40	21.7391	0.126869
2910	PTN--epithelial--PTPRB--epithelial	PTN	epithelial	PTPRB	epithelial	1	1	4	5	9.09091	7.69231	40	21.7391	0.126869
3512	SELE--epithelial--CEACAM1--epithelial	SELE	epithelial	CEACAM1	epithelial	2	1	4	5	18.1818	7.69231	40	21.7391	0.126869
3643	IL33--myeloid--IL1RAP--myeloid	IL33	myeloid	IL1RAP	myeloid	0	1	4	5	0	7.69231	40	21.7391	0.126869
3660	IL33--epithelial--IL1RAP--myeloid	IL33	epithelial	IL1RAP	myeloid	0	1	4	5	0	7.69231	40	21.7391	0.126869
579	DCN--myeloid--MET--epithelial	DCN	myeloid	MET	epithelial	10	12	6	18	90.9091	92.3077	60	78.2609	0.126869
638	VEGFA--myeloid--KDR--endothelial	VEGFA	myeloid	KDR	endothelial	7	12	6	18	63.6364	92.3077	60	78.2609	0.126869
641	EDN1--endothelial--EDNRB--endothelial	EDN1	endothelial	EDNRB	endothelial	10	12	6	18	90.9091	92.3077	60	78.2609	0.126869
669	VEGFA--epithelial--NRP2--epithelial	VEGFA	epithelial	NRP2	epithelial	8	12	6	18	72.7273	92.3077	60	78.2609	0.126869
688	APOE--myeloid--ABCA1--myeloid	APOE	myeloid	ABCA1	myeloid	9	12	6	18	81.8182	92.3077	60	78.2609	0.126869
689	C3--epithelial--NRP1--myeloid	C3	epithelial	NRP1	myeloid	5	12	6	18	45.4545	92.3077	60	78.2609	0.126869
743	VEGFA--myeloid--NRP1--endothelial	VEGFA	myeloid	NRP1	endothelial	11	12	6	18	100	92.3077	60	78.2609	0.126869
747	TIMP1--epithelial--FGFR2--epithelial	TIMP1	epithelial	FGFR2	epithelial	8	12	6	18	72.7273	92.3077	60	78.2609	0.126869
816	EDN1--epithelial--EDNRA--stromal	EDN1	epithelial	EDNRA	stromal	6	12	6	18	54.5455	92.3077	60	78.2609	0.126869
823	TIMP1--lymphocyte--FGFR2--epithelial	TIMP1	lymphocyte	FGFR2	epithelial	8	12	6	18	72.7273	92.3077	60	78.2609	0.126869
990	SELE--endothelial--CEACAM1--lymphocyte	SELE	endothelial	CEACAM1	lymphocyte	11	12	6	18	100	92.3077	60	78.2609	0.126869
1213	LAMA4--stromal--CD44--stromal	LAMA4	stromal	CD44	stromal	7	12	6	18	63.6364	92.3077	60	78.2609	0.126869
1366	PLTP--stromal--ABCA1--myeloid	PLTP	stromal	ABCA1	myeloid	9	12	6	18	81.8182	92.3077	60	78.2609	0.126869
1611	PLTP--lymphocyte--ABCA1--myeloid	PLTP	lymphocyte	ABCA1	myeloid	6	12	6	18	54.5455	92.3077	60	78.2609	0.126869
1644	VEGFA--myeloid--NRP1--stromal	VEGFA	myeloid	NRP1	stromal	9	12	6	18	81.8182	92.3077	60	78.2609	0.126869
1847	THBS1--endothelial--ITGA4--lymphocyte	THBS1	endothelial	ITGA4	lymphocyte	7	12	6	18	63.6364	92.3077	60	78.2609	0.126869
2768	APOE--lymphocyte--ABCA1--myeloid	APOE	lymphocyte	ABCA1	myeloid	10	12	6	18	90.9091	92.3077	60	78.2609	0.126869
1350	APOE--stromal--ABCA1--epithelial	APOE	stromal	ABCA1	epithelial	5	2	5	7	45.4545	15.3846	50	30.4348	0.168798
2650	MMP7--stromal--CD44--lymphocyte	MMP7	stromal	CD44	lymphocyte	4	2	5	7	36.3636	15.3846	50	30.4348	0.168798
418	TGM2--epithelial--SDC4--epithelial	TGM2	epithelial	SDC4	epithelial	9	11	5	16	81.8182	84.6154	50	69.5652	0.168798
604	RARRES1--myeloid--NRP2--epithelial	RARRES1	myeloid	NRP2	epithelial	8	11	5	16	72.7273	84.6154	50	69.5652	0.168798
663	RARRES1--lymphocyte--NRP2--epithelial	RARRES1	lymphocyte	NRP2	epithelial	8	11	5	16	72.7273	84.6154	50	69.5652	0.168798
845	CCN2--myeloid--FGFR2--epithelial	CCN2	myeloid	FGFR2	epithelial	7	11	5	16	63.6364	84.6154	50	69.5652	0.168798
878	FGF7--lymphocyte--FGFR2--epithelial	FGF7	lymphocyte	FGFR2	epithelial	7	11	5	16	63.6364	84.6154	50	69.5652	0.168798
891	IL6--myeloid--HRH1--epithelial	IL6	myeloid	HRH1	epithelial	8	11	5	16	72.7273	84.6154	50	69.5652	0.168798
957	SELE--endothelial--CEACAM1--myeloid	SELE	endothelial	CEACAM1	myeloid	9	11	5	16	81.8182	84.6154	50	69.5652	0.168798
1526	ADCYAP1--stromal--VIPR2--stromal	ADCYAP1	stromal	VIPR2	stromal	10	11	5	16	90.9091	84.6154	50	69.5652	0.168798
1796	CADM1--myeloid--CRTAM--lymphocyte	CADM1	myeloid	CRTAM	lymphocyte	7	11	5	16	63.6364	84.6154	50	69.5652	0.168798
1797	CRTAM--lymphocyte--CADM1--myeloid	CRTAM	lymphocyte	CADM1	myeloid	7	11	5	16	63.6364	84.6154	50	69.5652	0.168798
2093	HLA-A--stromal--LILRB1--myeloid	HLA-A	stromal	LILRB1	myeloid	4	11	5	16	36.3636	84.6154	50	69.5652	0.168798
2163	LAMA3--stromal--ITGA6--epithelial	LAMA3	stromal	ITGA6	epithelial	8	11	5	16	72.7273	84.6154	50	69.5652	0.168798
2165	VEGFA--myeloid--NRP2--stromal	VEGFA	myeloid	NRP2	stromal	9	11	5	16	81.8182	84.6154	50	69.5652	0.168798
2211	MYL9--stromal--CD69--myeloid	MYL9	stromal	CD69	myeloid	6	11	5	16	54.5455	84.6154	50	69.5652	0.168798
2446	FN1--stromal--ITGA2--lymphocyte	FN1	stromal	ITGA2	lymphocyte	5	11	5	16	45.4545	84.6154	50	69.5652	0.168798
2533	WNT5A--endothelial--FZD4--endothelial	WNT5A	endothelial	FZD4	endothelial	2	0	2	2	18.1818	0	20	8.69565	0.177866
2534	LAMA3--endothelial--ITGB4--epithelial	LAMA3	endothelial	ITGB4	epithelial	1	0	2	2	9.09091	0	20	8.69565	0.177866
2564	LAMA3--lymphocyte--ITGB4--epithelial	LAMA3	lymphocyte	ITGB4	epithelial	1	0	2	2	9.09091	0	20	8.69565	0.177866
2589	LAMA4--myeloid--ITGB4--epithelial	LAMA4	myeloid	ITGB4	epithelial	1	0	2	2	9.09091	0	20	8.69565	0.177866
2602	LAMA4--lymphocyte--ITGB4--epithelial	LAMA4	lymphocyte	ITGB4	epithelial	1	0	2	2	9.09091	0	20	8.69565	0.177866
2807	VEGFA--stromal--KDR--myeloid	VEGFA	stromal	KDR	myeloid	4	0	2	2	36.3636	0	20	8.69565	0.177866
2819	ANGPTL4--epithelial--SDC4--stromal	ANGPTL4	epithelial	SDC4	stromal	1	0	2	2	9.09091	0	20	8.69565	0.177866
2846	FN1--lymphocyte--CD44--myeloid	FN1	lymphocyte	CD44	myeloid	3	0	2	2	27.2727	0	20	8.69565	0.177866
2857	FN1--myeloid--CD44--myeloid	FN1	myeloid	CD44	myeloid	3	0	2	2	27.2727	0	20	8.69565	0.177866
2912	HSPA1A--stromal--TLR4--lymphocyte	HSPA1A	stromal	TLR4	lymphocyte	2	0	2	2	18.1818	0	20	8.69565	0.177866
3635	LAMB1--lymphocyte--ITGB4--epithelial	LAMB1	lymphocyte	ITGB4	epithelial	0	0	2	2	0	0	20	8.69565	0.177866
3651	ICAM1--myeloid--MUC1--endothelial	ICAM1	myeloid	MUC1	endothelial	2	0	2	2	18.1818	0	20	8.69565	0.177866
3667	RPS19--epithelial--C5AR1--epithelial	RPS19	epithelial	C5AR1	epithelial	0	0	2	2	0	0	20	8.69565	0.177866
3676	WNT5A--myeloid--FZD4--stromal	WNT5A	myeloid	FZD4	stromal	0	0	2	2	0	0	20	8.69565	0.177866
3686	CD59--epithelial--STAB1--stromal	CD59	epithelial	STAB1	stromal	1	0	2	2	9.09091	0	20	8.69565	0.177866
3701	EFNA5--epithelial--EPHA7--myeloid	EFNA5	epithelial	EPHA7	myeloid	0	0	2	2	0	0	20	8.69565	0.177866
3708	B2M--myeloid--KLRC1--endothelial	B2M	myeloid	KLRC1	endothelial	0	0	2	2	0	0	20	8.69565	0.177866
3731	ANGPTL4--endothelial--CDH5--stromal	ANGPTL4	endothelial	CDH5	stromal	0	0	2	2	0	0	20	8.69565	0.177866
4254	CXCL8--myeloid--KDR--lymphocyte	CXCL8	myeloid	KDR	lymphocyte	3	0	2	2	27.2727	0	20	8.69565	0.177866
4257	TNC--endothelial--ITGA2--epithelial	TNC	endothelial	ITGA2	epithelial	3	0	2	2	27.2727	0	20	8.69565	0.177866
4261	ADM--myeloid--RAMP1--lymphocyte	ADM	myeloid	RAMP1	lymphocyte	2	0	2	2	18.1818	0	20	8.69565	0.177866
4262	CD38--stromal--PECAM1--myeloid	CD38	stromal	PECAM1	myeloid	1	0	2	2	9.09091	0	20	8.69565	0.177866
4298	IL1B--endothelial--IL1RAP--myeloid	IL1B	endothelial	IL1RAP	myeloid	2	0	2	2	18.1818	0	20	8.69565	0.177866
4314	CD14--endothelial--TLR4--endothelial	CD14	endothelial	TLR4	endothelial	1	0	2	2	9.09091	0	20	8.69565	0.177866
4338	TNC--epithelial--PTPRB--epithelial	TNC	epithelial	PTPRB	epithelial	2	0	2	2	18.1818	0	20	8.69565	0.177866
4422	SPN--myeloid--SIGLEC1--stromal	SPN	myeloid	SIGLEC1	stromal	1	0	2	2	9.09091	0	20	8.69565	0.177866
4423	SPN--myeloid--SIGLEC1--epithelial	SPN	myeloid	SIGLEC1	epithelial	1	0	2	2	9.09091	0	20	8.69565	0.177866
4424	SPN--myeloid--SIGLEC1--endothelial	SPN	myeloid	SIGLEC1	endothelial	1	0	2	2	9.09091	0	20	8.69565	0.177866
4427	RPS19--epithelial--C5AR1--stromal	RPS19	epithelial	C5AR1	stromal	0	0	2	2	0	0	20	8.69565	0.177866
4438	S100A8--stromal--TLR4--epithelial	S100A8	stromal	TLR4	epithelial	0	0	2	2	0	0	20	8.69565	0.177866
4439	CD14--stromal--TLR4--epithelial	CD14	stromal	TLR4	epithelial	0	0	2	2	0	0	20	8.69565	0.177866
4442	LAMB3--endothelial--CD44--lymphocyte	LAMB3	endothelial	CD44	lymphocyte	1	0	2	2	9.09091	0	20	8.69565	0.177866
4526	IL1B--lymphocyte--IL1R1--epithelial	IL1B	lymphocyte	IL1R1	epithelial	1	0	2	2	9.09091	0	20	8.69565	0.177866
4537	LAMA4--endothelial--ITGB4--myeloid	LAMA4	endothelial	ITGB4	myeloid	1	0	2	2	9.09091	0	20	8.69565	0.177866
4544	ANGPTL4--endothelial--CDH5--epithelial	ANGPTL4	endothelial	CDH5	epithelial	0	0	2	2	0	0	20	8.69565	0.177866
4546	LGI4--lymphocyte--ADAM23--endothelial	LGI4	lymphocyte	ADAM23	endothelial	0	0	2	2	0	0	20	8.69565	0.177866
4564	TIMP1--endothelial--FGFR2--lymphocyte	TIMP1	endothelial	FGFR2	lymphocyte	0	0	2	2	0	0	20	8.69565	0.177866
4582	TNFSF10--stromal--TNFRSF11B--stromal	TNFSF10	stromal	TNFRSF11B	stromal	0	0	2	2	0	0	20	8.69565	0.177866
178	ICAM1--myeloid--MUC1--epithelial	ICAM1	myeloid	MUC1	epithelial	11	13	8	21	100	100	80	91.3043	0.177866
283	PLAU--myeloid--PLAUR--epithelial	PLAU	myeloid	PLAUR	epithelial	11	13	8	21	100	100	80	91.3043	0.177866
297	ICAM1--lymphocyte--MUC1--epithelial	ICAM1	lymphocyte	MUC1	epithelial	11	13	8	21	100	100	80	91.3043	0.177866
304	VEGFA--myeloid--NRP2--epithelial	VEGFA	myeloid	NRP2	epithelial	11	13	8	21	100	100	80	91.3043	0.177866
343	FN1--lymphocyte--C5AR1--myeloid	FN1	lymphocyte	C5AR1	myeloid	11	13	8	21	100	100	80	91.3043	0.177866
377	VEGFA--stromal--NRP2--epithelial	VEGFA	stromal	NRP2	epithelial	10	13	8	21	90.9091	100	80	91.3043	0.177866
495	PLAU--myeloid--ITGA5--stromal	PLAU	myeloid	ITGA5	stromal	10	13	8	21	90.9091	100	80	91.3043	0.177866
601	SEMA3A--stromal--NRP2--epithelial	SEMA3A	stromal	NRP2	epithelial	10	13	8	21	90.9091	100	80	91.3043	0.177866
797	SLPI--lymphocyte--PLSCR1--myeloid	SLPI	lymphocyte	PLSCR1	myeloid	10	13	8	21	90.9091	100	80	91.3043	0.177866
818	VEGFA--myeloid--GRIN2B--epithelial	VEGFA	myeloid	GRIN2B	epithelial	10	13	8	21	90.9091	100	80	91.3043	0.177866
960	THBS1--myeloid--CD47--lymphocyte	THBS1	myeloid	CD47	lymphocyte	11	13	8	21	100	100	80	91.3043	0.177866
1036	HDC--myeloid--HRH1--epithelial	HDC	myeloid	HRH1	epithelial	9	13	8	21	81.8182	100	80	91.3043	0.177866
1211	THBS1--myeloid--TNFRSF11B--lymphocyte	THBS1	myeloid	TNFRSF11B	lymphocyte	11	13	8	21	100	100	80	91.3043	0.177866
1418	FN1--stromal--PLAUR--epithelial	FN1	stromal	PLAUR	epithelial	11	13	8	21	100	100	80	91.3043	0.177866
1698	TNFSF10--lymphocyte--CCR6--lymphocyte	TNFSF10	lymphocyte	CCR6	lymphocyte	11	13	8	21	100	100	80	91.3043	0.177866
1911	VCAN--stromal--TLR2--stromal	VCAN	stromal	TLR2	stromal	9	13	8	21	81.8182	100	80	91.3043	0.177866
709	IGLC1--endothelial--FCGR2B--myeloid	IGLC1	endothelial	FCGR2B	myeloid	2	5	1	6	18.1818	38.4615	10	26.087	0.179025
928	MDK--stromal--SDC4--endothelial	MDK	stromal	SDC4	endothelial	1	5	1	6	9.09091	38.4615	10	26.087	0.179025
1229	MDK--stromal--PTPRZ1--lymphocyte	MDK	stromal	PTPRZ1	lymphocyte	3	5	1	6	27.2727	38.4615	10	26.087	0.179025
1261	COL1A1--stromal--DDR2--endothelial	COL1A1	stromal	DDR2	endothelial	4	5	1	6	36.3636	38.4615	10	26.087	0.179025
1309	HGF--epithelial--NRP1--myeloid	HGF	epithelial	NRP1	myeloid	0	5	1	6	0	38.4615	10	26.087	0.179025
1443	MDK--stromal--PTPRZ1--epithelial	MDK	stromal	PTPRZ1	epithelial	3	5	1	6	27.2727	38.4615	10	26.087	0.179025
1742	TFPI--stromal--SDC4--endothelial	TFPI	stromal	SDC4	endothelial	2	5	1	6	18.1818	38.4615	10	26.087	0.179025
1775	SPP1--endothelial--S1PR1--myeloid	SPP1	endothelial	S1PR1	myeloid	2	5	1	6	18.1818	38.4615	10	26.087	0.179025
1778	LGI4--stromal--ADAM22--endothelial	LGI4	stromal	ADAM22	endothelial	1	5	1	6	9.09091	38.4615	10	26.087	0.179025
1810	ALCAM--myeloid--CD6--endothelial	ALCAM	myeloid	CD6	endothelial	4	5	1	6	36.3636	38.4615	10	26.087	0.179025
1817	EFNA5--endothelial--EPHA7--epithelial	EFNA5	endothelial	EPHA7	epithelial	1	5	1	6	9.09091	38.4615	10	26.087	0.179025
1951	CCN2--lymphocyte--ITGA5--endothelial	CCN2	lymphocyte	ITGA5	endothelial	2	5	1	6	18.1818	38.4615	10	26.087	0.179025
1957	PTN--stromal--SDC4--endothelial	PTN	stromal	SDC4	endothelial	1	5	1	6	9.09091	38.4615	10	26.087	0.179025
2101	FGF18--epithelial--FGFR1--endothelial	FGF18	epithelial	FGFR1	endothelial	2	5	1	6	18.1818	38.4615	10	26.087	0.179025
2180	TNC--stromal--ITGA7--epithelial	TNC	stromal	ITGA7	epithelial	3	5	1	6	27.2727	38.4615	10	26.087	0.179025
2239	ICAM1--epithelial--CAV1--stromal	ICAM1	epithelial	CAV1	stromal	2	5	1	6	18.1818	38.4615	10	26.087	0.179025
2608	B2M--endothelial--CD247--endothelial	B2M	endothelial	CD247	endothelial	4	5	1	6	36.3636	38.4615	10	26.087	0.179025
2611	COMP--myeloid--CD47--lymphocyte	COMP	myeloid	CD47	lymphocyte	2	5	1	6	18.1818	38.4615	10	26.087	0.179025
2648	B2M--endothelial--CD3G--myeloid	B2M	endothelial	CD3G	myeloid	4	5	1	6	36.3636	38.4615	10	26.087	0.179025
2659	B2M--endothelial--KLRD1--epithelial	B2M	endothelial	KLRD1	epithelial	3	5	1	6	27.2727	38.4615	10	26.087	0.179025
2661	B2M--endothelial--KLRC2--myeloid	B2M	endothelial	KLRC2	myeloid	5	5	1	6	45.4545	38.4615	10	26.087	0.179025
2668	B2M--endothelial--KLRC1--epithelial	B2M	endothelial	KLRC1	epithelial	5	5	1	6	45.4545	38.4615	10	26.087	0.179025
2673	B2M--endothelial--KLRC1--myeloid	B2M	endothelial	KLRC1	myeloid	5	5	1	6	45.4545	38.4615	10	26.087	0.179025
2677	B2M--endothelial--KLRC2--epithelial	B2M	endothelial	KLRC2	epithelial	5	5	1	6	45.4545	38.4615	10	26.087	0.179025
2678	B2M--endothelial--CD3G--epithelial	B2M	endothelial	CD3G	epithelial	4	5	1	6	36.3636	38.4615	10	26.087	0.179025
2680	B2M--endothelial--CD247--stromal	B2M	endothelial	CD247	stromal	5	5	1	6	45.4545	38.4615	10	26.087	0.179025
2976	FN1--stromal--C5AR1--lymphocyte	FN1	stromal	C5AR1	lymphocyte	3	5	1	6	27.2727	38.4615	10	26.087	0.179025
3049	ACE--myeloid--BDKRB2--endothelial	ACE	myeloid	BDKRB2	endothelial	3	5	1	6	27.2727	38.4615	10	26.087	0.179025
3207	COL4A1--stromal--CD44--epithelial	COL4A1	stromal	CD44	epithelial	5	5	1	6	45.4545	38.4615	10	26.087	0.179025
3306	PGF--stromal--NRP1--stromal	PGF	stromal	NRP1	stromal	4	5	1	6	36.3636	38.4615	10	26.087	0.179025
3347	B2M--endothelial--CD247--epithelial	B2M	endothelial	CD247	epithelial	1	5	1	6	9.09091	38.4615	10	26.087	0.179025
3381	IL33--lymphocyte--IL1RL1--myeloid	IL33	lymphocyte	IL1RL1	myeloid	2	5	1	6	18.1818	38.4615	10	26.087	0.179025
3405	VEGFA--epithelial--NRP2--myeloid	VEGFA	epithelial	NRP2	myeloid	0	5	1	6	0	38.4615	10	26.087	0.179025
3788	CEACAM1--endothelial--EGFR--epithelial	CEACAM1	endothelial	EGFR	epithelial	0	5	1	6	0	38.4615	10	26.087	0.179025
3823	CEACAM1--endothelial--HAVCR2--stromal	CEACAM1	endothelial	HAVCR2	stromal	0	5	1	6	0	38.4615	10	26.087	0.179025
3918	CSF1--epithelial--CSF3R--epithelial	CSF1	epithelial	CSF3R	epithelial	3	5	1	6	27.2727	38.4615	10	26.087	0.179025
548	LAMB3--epithelial--ITGB4--stromal	LAMB3	epithelial	ITGB4	stromal	9	8	9	17	81.8182	61.5385	90	73.913	0.179025
970	PDGFB--myeloid--S1PR1--lymphocyte	PDGFB	myeloid	S1PR1	lymphocyte	6	8	9	17	54.5455	61.5385	90	73.913	0.179025
1999	S100A10--stromal--CFTR--epithelial	S100A10	stromal	CFTR	epithelial	9	8	9	17	81.8182	61.5385	90	73.913	0.179025
3493	HDC--myeloid--HRH1--stromal	HDC	myeloid	HRH1	stromal	7	8	9	17	63.6364	61.5385	90	73.913	0.179025
3642	WNT5A--myeloid--LDLR--epithelial	WNT5A	myeloid	LDLR	epithelial	8	8	9	17	72.7273	61.5385	90	73.913	0.179025
446	ACE--epithelial--BDKRB2--endothelial	ACE	epithelial	BDKRB2	endothelial	3	7	2	9	27.2727	53.8462	20	39.1304	0.196796
696	ADM--myeloid--RAMP1--stromal	ADM	myeloid	RAMP1	stromal	5	7	2	9	45.4545	53.8462	20	39.1304	0.196796
905	ADAM12--stromal--SDC4--endothelial	ADAM12	stromal	SDC4	endothelial	3	7	2	9	27.2727	53.8462	20	39.1304	0.196796
1080	TFPI--endothelial--F3--epithelial	TFPI	endothelial	F3	epithelial	5	7	2	9	45.4545	53.8462	20	39.1304	0.196796
1109	C3--lymphocyte--C5AR2--myeloid	C3	lymphocyte	C5AR2	myeloid	5	7	2	9	45.4545	53.8462	20	39.1304	0.196796
1124	MDK--stromal--PTPRZ1--endothelial	MDK	stromal	PTPRZ1	endothelial	4	7	2	9	36.3636	53.8462	20	39.1304	0.196796
1257	ALCAM--myeloid--CHL1--endothelial	ALCAM	myeloid	CHL1	endothelial	6	7	2	9	54.5455	53.8462	20	39.1304	0.196796
1511	TIMP3--stromal--KDR--epithelial	TIMP3	stromal	KDR	epithelial	4	7	2	9	36.3636	53.8462	20	39.1304	0.196796
1572	HSPG2--epithelial--ITGA2--stromal	HSPG2	epithelial	ITGA2	stromal	3	7	2	9	27.2727	53.8462	20	39.1304	0.196796
1662	CCL5--epithelial--SDC4--epithelial	CCL5	epithelial	SDC4	epithelial	3	7	2	9	27.2727	53.8462	20	39.1304	0.196796
1897	FGF2--epithelial--NRP1--endothelial	FGF2	epithelial	NRP1	endothelial	4	7	2	9	36.3636	53.8462	20	39.1304	0.196796
1916	COL4A2--stromal--CD93--epithelial	COL4A2	stromal	CD93	epithelial	3	7	2	9	27.2727	53.8462	20	39.1304	0.196796
1952	CXCL12--endothelial--ITGA5--stromal	CXCL12	endothelial	ITGA5	stromal	8	7	2	9	72.7273	53.8462	20	39.1304	0.196796
1967	FGF2--stromal--SDC4--endothelial	FGF2	stromal	SDC4	endothelial	2	7	2	9	18.1818	53.8462	20	39.1304	0.196796
1992	EFNA5--endothelial--EPHA3--epithelial	EFNA5	endothelial	EPHA3	epithelial	0	7	2	9	0	53.8462	20	39.1304	0.196796
2047	EDN1--epithelial--ADGRL4--myeloid	EDN1	epithelial	ADGRL4	myeloid	2	7	2	9	18.1818	53.8462	20	39.1304	0.196796
2055	MMP2--endothelial--FGFR1--stromal	MMP2	endothelial	FGFR1	stromal	4	7	2	9	36.3636	53.8462	20	39.1304	0.196796
2069	TNF--epithelial--FLT4--lymphocyte	TNF	epithelial	FLT4	lymphocyte	1	7	2	9	9.09091	53.8462	20	39.1304	0.196796
2225	CXCL3--epithelial--ACKR1--stromal	CXCL3	epithelial	ACKR1	stromal	5	7	2	9	45.4545	53.8462	20	39.1304	0.196796
2234	COL4A2--stromal--CD44--epithelial	COL4A2	stromal	CD44	epithelial	5	7	2	9	45.4545	53.8462	20	39.1304	0.196796
2357	FN1--myeloid--PLAUR--epithelial	FN1	myeloid	PLAUR	epithelial	3	7	2	9	27.2727	53.8462	20	39.1304	0.196796
2394	TNC--stromal--PTPRB--lymphocyte	TNC	stromal	PTPRB	lymphocyte	2	7	2	9	18.1818	53.8462	20	39.1304	0.196796
2833	IGF1--myeloid--INSR--endothelial	IGF1	myeloid	INSR	endothelial	6	7	2	9	54.5455	53.8462	20	39.1304	0.196796
3758	PTN--endothelial--SDC4--epithelial	PTN	endothelial	SDC4	epithelial	2	7	2	9	18.1818	53.8462	20	39.1304	0.196796
1051	MDK--stromal--SDC4--stromal	MDK	stromal	SDC4	stromal	7	5	7	12	63.6364	38.4615	70	52.1739	0.213757
2160	CXCL12--stromal--SDC4--stromal	CXCL12	stromal	SDC4	stromal	7	5	7	12	63.6364	38.4615	70	52.1739	0.213757
2572	DCN--stromal--MET--endothelial	DCN	stromal	MET	endothelial	9	5	7	12	81.8182	38.4615	70	52.1739	0.213757
2785	FGF7--stromal--NRP1--epithelial	FGF7	stromal	NRP1	epithelial	6	5	7	12	54.5455	38.4615	70	52.1739	0.213757
2997	IL6--endothelial--HRH1--stromal	IL6	endothelial	HRH1	stromal	3	5	7	12	27.2727	38.4615	70	52.1739	0.213757
584	TNFSF10--epithelial--TNFRSF11B--endothelial	TNFSF10	epithelial	TNFRSF11B	endothelial	4	8	3	11	36.3636	61.5385	30	47.8261	0.213757
729	PLAU--myeloid--ITGA3--endothelial	PLAU	myeloid	ITGA3	endothelial	5	8	3	11	45.4545	61.5385	30	47.8261	0.213757
732	LAMB1--endothelial--ITGA1--endothelial	LAMB1	endothelial	ITGA1	endothelial	8	8	3	11	72.7273	61.5385	30	47.8261	0.213757
752	IL33--endothelial--IL1RL1--myeloid	IL33	endothelial	IL1RL1	myeloid	9	8	3	11	81.8182	61.5385	30	47.8261	0.213757
972	COMP--epithelial--CD47--epithelial	COMP	epithelial	CD47	epithelial	7	8	3	11	63.6364	61.5385	30	47.8261	0.213757
975	HSPG2--epithelial--ITGA2--endothelial	HSPG2	epithelial	ITGA2	endothelial	5	8	3	11	45.4545	61.5385	30	47.8261	0.213757
1206	FGF9--epithelial--FGFR2--myeloid	FGF9	epithelial	FGFR2	myeloid	3	8	3	11	27.2727	61.5385	30	47.8261	0.213757
1225	CXCL12--stromal--ACKR3--epithelial	CXCL12	stromal	ACKR3	epithelial	5	8	3	11	45.4545	61.5385	30	47.8261	0.213757
1247	TFPI--myeloid--SDC4--epithelial	TFPI	myeloid	SDC4	epithelial	6	8	3	11	54.5455	61.5385	30	47.8261	0.213757
1303	ANGPTL4--myeloid--SDC4--epithelial	ANGPTL4	myeloid	SDC4	epithelial	7	8	3	11	63.6364	61.5385	30	47.8261	0.213757
1316	LRPAP1--stromal--LDLR--stromal	LRPAP1	stromal	LDLR	stromal	8	8	3	11	72.7273	61.5385	30	47.8261	0.213757
1508	VEGFA--epithelial--KDR--endothelial	VEGFA	epithelial	KDR	endothelial	4	8	3	11	36.3636	61.5385	30	47.8261	0.213757
1583	SORBS1--myeloid--INSR--endothelial	SORBS1	myeloid	INSR	endothelial	7	8	3	11	63.6364	61.5385	30	47.8261	0.213757
1665	PTN--myeloid--SDC4--epithelial	PTN	myeloid	SDC4	epithelial	3	8	3	11	27.2727	61.5385	30	47.8261	0.213757
1691	WNT5A--stromal--MCAM--stromal	WNT5A	stromal	MCAM	stromal	7	8	3	11	63.6364	61.5385	30	47.8261	0.213757
1756	COMP--lymphocyte--ITGA5--endothelial	COMP	lymphocyte	ITGA5	endothelial	4	8	3	11	36.3636	61.5385	30	47.8261	0.213757
1771	HSPG2--stromal--ITGA2--endothelial	HSPG2	stromal	ITGA2	endothelial	4	8	3	11	36.3636	61.5385	30	47.8261	0.213757
1773	EFNA5--endothelial--EPHA3--endothelial	EFNA5	endothelial	EPHA3	endothelial	3	8	3	11	27.2727	61.5385	30	47.8261	0.213757
2115	NID1--stromal--ITGA3--stromal	NID1	stromal	ITGA3	stromal	8	8	3	11	72.7273	61.5385	30	47.8261	0.213757
2396	FN1--stromal--ROBO4--myeloid	FN1	stromal	ROBO4	myeloid	4	8	3	11	36.3636	61.5385	30	47.8261	0.213757
2400	FN1--lymphocyte--PLAUR--epithelial	FN1	lymphocyte	PLAUR	epithelial	3	8	3	11	27.2727	61.5385	30	47.8261	0.213757
2458	FN1--stromal--ROBO4--epithelial	FN1	stromal	ROBO4	epithelial	4	8	3	11	36.3636	61.5385	30	47.8261	0.213757
2630	NCAM1--stromal--GFRA1--stromal	NCAM1	stromal	GFRA1	stromal	7	8	3	11	63.6364	61.5385	30	47.8261	0.213757
2798	APOE--epithelial--ABCA1--myeloid	APOE	epithelial	ABCA1	myeloid	6	8	3	11	54.5455	61.5385	30	47.8261	0.213757
3396	VEGFA--myeloid--CD44--epithelial	VEGFA	myeloid	CD44	epithelial	5	8	3	11	45.4545	61.5385	30	47.8261	0.213757
3508	CDH1--myeloid--KLRG1--lymphocyte	CDH1	myeloid	KLRG1	lymphocyte	7	8	3	11	63.6364	61.5385	30	47.8261	0.213757
2666	SELE--lymphocyte--CD44--lymphocyte	SELE	lymphocyte	CD44	lymphocyte	4	3	5	8	36.3636	23.0769	50	34.7826	0.221295
2721	HBEGF--stromal--CD44--lymphocyte	HBEGF	stromal	CD44	lymphocyte	4	3	5	8	36.3636	23.0769	50	34.7826	0.221295
2859	RSPO3--stromal--SDC4--stromal	RSPO3	stromal	SDC4	stromal	3	3	5	8	27.2727	23.0769	50	34.7826	0.221295
3124	LPL--lymphocyte--CD44--lymphocyte	LPL	lymphocyte	CD44	lymphocyte	4	3	5	8	36.3636	23.0769	50	34.7826	0.221295
3540	IL33--endothelial--IL1RAP--myeloid	IL33	endothelial	IL1RAP	myeloid	2	3	5	8	18.1818	23.0769	50	34.7826	0.221295
3571	IL33--stromal--IL1RAP--myeloid	IL33	stromal	IL1RAP	myeloid	1	3	5	8	9.09091	23.0769	50	34.7826	0.221295
3714	WNT7A--myeloid--LDLR--endothelial	WNT7A	myeloid	LDLR	endothelial	2	3	5	8	18.1818	23.0769	50	34.7826	0.221295
557	MMP7--epithelial--CD44--endothelial	MMP7	epithelial	CD44	endothelial	7	10	5	15	63.6364	76.9231	50	65.2174	0.221295
615	RARRES1--endothelial--NRP2--epithelial	RARRES1	endothelial	NRP2	epithelial	8	10	5	15	72.7273	76.9231	50	65.2174	0.221295
759	CCN2--epithelial--FGFR2--epithelial	CCN2	epithelial	FGFR2	epithelial	7	10	5	15	63.6364	76.9231	50	65.2174	0.221295
850	TIMP1--myeloid--FGFR2--epithelial	TIMP1	myeloid	FGFR2	epithelial	9	10	5	15	81.8182	76.9231	50	65.2174	0.221295
996	FGF9--epithelial--FGFR2--stromal	FGF9	epithelial	FGFR2	stromal	5	10	5	15	45.4545	76.9231	50	65.2174	0.221295
1015	ANXA1--epithelial--EGFR--epithelial	ANXA1	epithelial	EGFR	epithelial	7	10	5	15	63.6364	76.9231	50	65.2174	0.221295
1053	HDC--endothelial--HRH1--epithelial	HDC	endothelial	HRH1	epithelial	7	10	5	15	63.6364	76.9231	50	65.2174	0.221295
1088	PTGS2--endothelial--CAV1--endothelial	PTGS2	endothelial	CAV1	endothelial	8	10	5	15	72.7273	76.9231	50	65.2174	0.221295
1101	C3--stromal--NRP1--myeloid	C3	stromal	NRP1	myeloid	5	10	5	15	45.4545	76.9231	50	65.2174	0.221295
1310	SPP1--endothelial--CD44--lymphocyte	SPP1	endothelial	CD44	lymphocyte	7	10	5	15	63.6364	76.9231	50	65.2174	0.221295
1317	LAMB1--endothelial--ITGA1--stromal	LAMB1	endothelial	ITGA1	stromal	6	10	5	15	54.5455	76.9231	50	65.2174	0.221295
1330	HSPA8--endothelial--LDLR--stromal	HSPA8	endothelial	LDLR	stromal	8	10	5	15	72.7273	76.9231	50	65.2174	0.221295
1401	ADCYAP1--epithelial--VIPR2--stromal	ADCYAP1	epithelial	VIPR2	stromal	9	10	5	15	81.8182	76.9231	50	65.2174	0.221295
1465	SELE--endothelial--CD44--epithelial	SELE	endothelial	CD44	epithelial	8	10	5	15	72.7273	76.9231	50	65.2174	0.221295
1485	COL1A2--lymphocyte--CD93--myeloid	COL1A2	lymphocyte	CD93	myeloid	6	10	5	15	54.5455	76.9231	50	65.2174	0.221295
1566	PRG4--epithelial--CD44--myeloid	PRG4	epithelial	CD44	myeloid	5	10	5	15	45.4545	76.9231	50	65.2174	0.221295
1580	TIMP2--stromal--ITGA3--stromal	TIMP2	stromal	ITGA3	stromal	10	10	5	15	90.9091	76.9231	50	65.2174	0.221295
1601	SERPINE1--endothelial--PLAUR--epithelial	SERPINE1	endothelial	PLAUR	epithelial	5	10	5	15	45.4545	76.9231	50	65.2174	0.221295
1628	LGALS1--stromal--CD69--myeloid	LGALS1	stromal	CD69	myeloid	6	10	5	15	54.5455	76.9231	50	65.2174	0.221295
1694	FN1--stromal--ITGA2--endothelial	FN1	stromal	ITGA2	endothelial	8	10	5	15	72.7273	76.9231	50	65.2174	0.221295
1751	VEGFA--epithelial--NRP1--endothelial	VEGFA	epithelial	NRP1	endothelial	3	10	5	15	27.2727	76.9231	50	65.2174	0.221295
1896	CXCL2--epithelial--ACKR1--stromal	CXCL2	epithelial	ACKR1	stromal	5	10	5	15	45.4545	76.9231	50	65.2174	0.221295
1915	VCAN--stromal--EGFR--epithelial	VCAN	stromal	EGFR	epithelial	6	10	5	15	54.5455	76.9231	50	65.2174	0.221295
2161	C3--epithelial--C5AR2--stromal	C3	epithelial	C5AR2	stromal	6	10	5	15	54.5455	76.9231	50	65.2174	0.221295
2466	FN1--stromal--ITGA6--stromal	FN1	stromal	ITGA6	stromal	7	10	5	15	63.6364	76.9231	50	65.2174	0.221295
2790	VEGFA--epithelial--CD44--myeloid	VEGFA	epithelial	CD44	myeloid	4	10	5	15	36.3636	76.9231	50	65.2174	0.221295
2342	SELE--stromal--CD44--lymphocyte	SELE	stromal	CD44	lymphocyte	7	4	6	10	63.6364	30.7692	60	43.4783	0.221545
2507	LAMB1--endothelial--ITGB4--endothelial	LAMB1	endothelial	ITGB4	endothelial	8	4	6	10	72.7273	30.7692	60	43.4783	0.221545
938	FGF7--endothelial--FGFR2--epithelial	FGF7	endothelial	FGFR2	epithelial	7	9	4	13	63.6364	69.2308	40	56.5217	0.221545
971	LAMB1--endothelial--CD44--myeloid	LAMB1	endothelial	CD44	myeloid	9	9	4	13	81.8182	69.2308	40	56.5217	0.221545
1066	TGM2--endothelial--SDC4--endothelial	TGM2	endothelial	SDC4	endothelial	5	9	4	13	45.4545	69.2308	40	56.5217	0.221545
1252	FGF9--epithelial--FGFR2--lymphocyte	FGF9	epithelial	FGFR2	lymphocyte	5	9	4	13	45.4545	69.2308	40	56.5217	0.221545
1371	CEACAM1--lymphocyte--HAVCR2--lymphocyte	CEACAM1	lymphocyte	HAVCR2	lymphocyte	7	9	4	13	63.6364	69.2308	40	56.5217	0.221545
1451	VEGFA--endothelial--NRP2--epithelial	VEGFA	endothelial	NRP2	epithelial	6	9	4	13	54.5455	69.2308	40	56.5217	0.221545
1471	EFNB2--endothelial--EPHA3--myeloid	EFNB2	endothelial	EPHA3	myeloid	10	9	4	13	90.9091	69.2308	40	56.5217	0.221545
1479	EFNB2--endothelial--EPHA3--lymphocyte	EFNB2	endothelial	EPHA3	lymphocyte	10	9	4	13	90.9091	69.2308	40	56.5217	0.221545
1483	RSPO3--lymphocyte--SDC4--epithelial	RSPO3	lymphocyte	SDC4	epithelial	6	9	4	13	54.5455	69.2308	40	56.5217	0.221545
1510	SERPINE1--epithelial--PLAUR--myeloid	SERPINE1	epithelial	PLAUR	myeloid	7	9	4	13	63.6364	69.2308	40	56.5217	0.221545
1546	TNC--stromal--ITGA2--endothelial	TNC	stromal	ITGA2	endothelial	7	9	4	13	63.6364	69.2308	40	56.5217	0.221545
1553	ADCYAP1--endothelial--VIPR2--stromal	ADCYAP1	endothelial	VIPR2	stromal	5	9	4	13	45.4545	69.2308	40	56.5217	0.221545
1660	CRTAM--lymphocyte--CADM1--endothelial	CRTAM	lymphocyte	CADM1	endothelial	4	9	4	13	36.3636	69.2308	40	56.5217	0.221545
1661	CADM1--endothelial--CRTAM--lymphocyte	CADM1	endothelial	CRTAM	lymphocyte	4	9	4	13	36.3636	69.2308	40	56.5217	0.221545
1732	S100A4--myeloid--EGFR--stromal	S100A4	myeloid	EGFR	stromal	6	9	4	13	54.5455	69.2308	40	56.5217	0.221545
1962	COL1A2--stromal--CD93--epithelial	COL1A2	stromal	CD93	epithelial	7	9	4	13	63.6364	69.2308	40	56.5217	0.221545
2002	COL4A2--stromal--CD93--stromal	COL4A2	stromal	CD93	stromal	7	9	4	13	63.6364	69.2308	40	56.5217	0.221545
2010	HSP90AA1--endothelial--EGFR--epithelial	HSP90AA1	endothelial	EGFR	epithelial	0	9	4	13	0	69.2308	40	56.5217	0.221545
2089	EDN1--epithelial--EDNRB--lymphocyte	EDN1	epithelial	EDNRB	lymphocyte	3	9	4	13	27.2727	69.2308	40	56.5217	0.221545
2288	FN1--endothelial--PLAUR--epithelial	FN1	endothelial	PLAUR	epithelial	3	9	4	13	27.2727	69.2308	40	56.5217	0.221545
2293	THBS2--stromal--ITGA6--myeloid	THBS2	stromal	ITGA6	myeloid	8	9	4	13	72.7273	69.2308	40	56.5217	0.221545
2404	THBS1--stromal--TNFRSF11B--lymphocyte	THBS1	stromal	TNFRSF11B	lymphocyte	7	9	4	13	63.6364	69.2308	40	56.5217	0.221545
2419	THBS1--stromal--TNFRSF11B--myeloid	THBS1	stromal	TNFRSF11B	myeloid	6	9	4	13	54.5455	69.2308	40	56.5217	0.221545
3787	PLAU--lymphocyte--PLAUR--epithelial	PLAU	lymphocyte	PLAUR	epithelial	6	9	4	13	54.5455	69.2308	40	56.5217	0.221545
1071	C3--endothelial--ITGAX--lymphocyte	C3	endothelial	ITGAX	lymphocyte	0	3	0	3	0	23.0769	0	13.0435	0.229249
1493	FGF2--myeloid--NRP1--myeloid	FGF2	myeloid	NRP1	myeloid	0	3	0	3	0	23.0769	0	13.0435	0.229249
1513	SORBS1--endothelial--ITGA1--endothelial	SORBS1	endothelial	ITGA1	endothelial	3	3	0	3	27.2727	23.0769	0	13.0435	0.229249
1745	FGF7--myeloid--NRP1--myeloid	FGF7	myeloid	NRP1	myeloid	0	3	0	3	0	23.0769	0	13.0435	0.229249
1753	ECM1--stromal--ITGB4--stromal	ECM1	stromal	ITGB4	stromal	3	3	0	3	27.2727	23.0769	0	13.0435	0.229249
1772	C3--endothelial--NRP1--myeloid	C3	endothelial	NRP1	myeloid	0	3	0	3	0	23.0769	0	13.0435	0.229249
1783	MMP2--stromal--FGFR1--endothelial	MMP2	stromal	FGFR1	endothelial	4	3	0	3	36.3636	23.0769	0	13.0435	0.229249
1815	SPON2--stromal--ITGA5--lymphocyte	SPON2	stromal	ITGA5	lymphocyte	2	3	0	3	18.1818	23.0769	0	13.0435	0.229249
1892	WNT5A--stromal--FZD4--myeloid	WNT5A	stromal	FZD4	myeloid	1	3	0	3	9.09091	23.0769	0	13.0435	0.229249
1928	HBEGF--stromal--PRLR--stromal	HBEGF	stromal	PRLR	stromal	0	3	0	3	0	23.0769	0	13.0435	0.229249
1972	PDGFB--myeloid--PDGFRB--endothelial	PDGFB	myeloid	PDGFRB	endothelial	1	3	0	3	9.09091	23.0769	0	13.0435	0.229249
2022	PRG4--epithelial--CD44--stromal	PRG4	epithelial	CD44	stromal	1	3	0	3	9.09091	23.0769	0	13.0435	0.229249
2062	LGI4--epithelial--ADAM22--endothelial	LGI4	epithelial	ADAM22	endothelial	0	3	0	3	0	23.0769	0	13.0435	0.229249
2075	CXCL12--stromal--ITGA5--myeloid	CXCL12	stromal	ITGA5	myeloid	2	3	0	3	18.1818	23.0769	0	13.0435	0.229249
2090	CXCL12--lymphocyte--ACKR3--epithelial	CXCL12	lymphocyte	ACKR3	epithelial	1	3	0	3	9.09091	23.0769	0	13.0435	0.229249
2098	PDGFB--myeloid--PDGFRB--epithelial	PDGFB	myeloid	PDGFRB	epithelial	1	3	0	3	9.09091	23.0769	0	13.0435	0.229249
2148	FGF2--stromal--FGFR1--endothelial	FGF2	stromal	FGFR1	endothelial	3	3	0	3	27.2727	23.0769	0	13.0435	0.229249
2279	VEGFA--lymphocyte--NRP1--myeloid	VEGFA	lymphocyte	NRP1	myeloid	0	3	0	3	0	23.0769	0	13.0435	0.229249
2306	TNC--lymphocyte--ITGA2--endothelial	TNC	lymphocyte	ITGA2	endothelial	1	3	0	3	9.09091	23.0769	0	13.0435	0.229249
2327	FGF7--endothelial--NRP1--endothelial	FGF7	endothelial	NRP1	endothelial	1	3	0	3	9.09091	23.0769	0	13.0435	0.229249
2424	FN1--endothelial--ITGA2--endothelial	FN1	endothelial	ITGA2	endothelial	1	3	0	3	9.09091	23.0769	0	13.0435	0.229249
2473	SORBS1--myeloid--ITGA1--stromal	SORBS1	myeloid	ITGA1	stromal	0	3	0	3	0	23.0769	0	13.0435	0.229249
2477	FGF7--lymphocyte--FGFR1--stromal	FGF7	lymphocyte	FGFR1	stromal	2	3	0	3	18.1818	23.0769	0	13.0435	0.229249
2576	CXCL12--endothelial--ACKR3--stromal	CXCL12	endothelial	ACKR3	stromal	6	3	0	3	54.5455	23.0769	0	13.0435	0.229249
2716	CXCL12--myeloid--ITGA5--stromal	CXCL12	myeloid	ITGA5	stromal	1	3	0	3	9.09091	23.0769	0	13.0435	0.229249
2998	S100A10--endothelial--CFTR--myeloid	S100A10	endothelial	CFTR	myeloid	5	3	0	3	45.4545	23.0769	0	13.0435	0.229249
3002	NID1--stromal--ITGA3--myeloid	NID1	stromal	ITGA3	myeloid	2	3	0	3	18.1818	23.0769	0	13.0435	0.229249
3018	SLIT2--stromal--ROBO4--epithelial	SLIT2	stromal	ROBO4	epithelial	2	3	0	3	18.1818	23.0769	0	13.0435	0.229249
3178	CXCL12--endothelial--ACKR3--lymphocyte	CXCL12	endothelial	ACKR3	lymphocyte	4	3	0	3	36.3636	23.0769	0	13.0435	0.229249
3200	JAG1--stromal--NOTCH4--stromal	JAG1	stromal	NOTCH4	stromal	3	3	0	3	27.2727	23.0769	0	13.0435	0.229249
3226	TIMP2--myeloid--CD44--stromal	TIMP2	myeloid	CD44	stromal	1	3	0	3	9.09091	23.0769	0	13.0435	0.229249
3247	SPP1--stromal--S1PR1--lymphocyte	SPP1	stromal	S1PR1	lymphocyte	0	3	0	3	0	23.0769	0	13.0435	0.229249
3255	BGN--stromal--TLR2--lymphocyte	BGN	stromal	TLR2	lymphocyte	2	3	0	3	18.1818	23.0769	0	13.0435	0.229249
3260	JAG1--stromal--NOTCH4--myeloid	JAG1	stromal	NOTCH4	myeloid	3	3	0	3	27.2727	23.0769	0	13.0435	0.229249
3312	ADM--stromal--ACKR3--stromal	ADM	stromal	ACKR3	stromal	0	3	0	3	0	23.0769	0	13.0435	0.229249
3595	S100A10--stromal--CFTR--endothelial	S100A10	stromal	CFTR	endothelial	2	3	0	3	18.1818	23.0769	0	13.0435	0.229249
3601	FGF18--epithelial--FGFR2--myeloid	FGF18	epithelial	FGFR2	myeloid	2	3	0	3	18.1818	23.0769	0	13.0435	0.229249
3784	THBS1--endothelial--SDC4--epithelial	THBS1	endothelial	SDC4	epithelial	1	3	0	3	9.09091	23.0769	0	13.0435	0.229249
3928	IL33--epithelial--IL1RL1--myeloid	IL33	epithelial	IL1RL1	myeloid	2	3	0	3	18.1818	23.0769	0	13.0435	0.229249
3934	PDGFB--lymphocyte--PDGFRA--stromal	PDGFB	lymphocyte	PDGFRA	stromal	2	3	0	3	18.1818	23.0769	0	13.0435	0.229249
4013	S100A8--myeloid--TLR4--stromal	S100A8	myeloid	TLR4	stromal	1	3	0	3	9.09091	23.0769	0	13.0435	0.229249
4018	COMP--endothelial--CD47--lymphocyte	COMP	endothelial	CD47	lymphocyte	0	3	0	3	0	23.0769	0	13.0435	0.229249
4025	CDH1--endothelial--EGFR--stromal	CDH1	endothelial	EGFR	stromal	6	3	0	3	54.5455	23.0769	0	13.0435	0.229249
4048	JAG1--stromal--NOTCH4--lymphocyte	JAG1	stromal	NOTCH4	lymphocyte	3	3	0	3	27.2727	23.0769	0	13.0435	0.229249
4090	ICAM1--endothelial--EGFR--epithelial	ICAM1	endothelial	EGFR	epithelial	4	3	0	3	36.3636	23.0769	0	13.0435	0.229249
4101	EFNA5--endothelial--EPHA7--endothelial	EFNA5	endothelial	EPHA7	endothelial	1	3	0	3	9.09091	23.0769	0	13.0435	0.229249
4110	EFNA5--endothelial--EPHA7--lymphocyte	EFNA5	endothelial	EPHA7	lymphocyte	1	3	0	3	9.09091	23.0769	0	13.0435	0.229249
4178	PLTP--myeloid--ABCA1--endothelial	PLTP	myeloid	ABCA1	endothelial	0	3	0	3	0	23.0769	0	13.0435	0.229249
4235	TNFSF10--lymphocyte--CCR6--myeloid	TNFSF10	lymphocyte	CCR6	myeloid	1	3	0	3	9.09091	23.0769	0	13.0435	0.229249
323	B2M--endothelial--CD247--lymphocyte	B2M	endothelial	CD247	lymphocyte	10	10	10	20	90.9091	76.9231	100	86.9565	0.229249
456	CCL5--endothelial--ACKR1--endothelial	CCL5	endothelial	ACKR1	endothelial	11	10	10	20	100	76.9231	100	86.9565	0.229249
487	CCL5--epithelial--ACKR1--endothelial	CCL5	epithelial	ACKR1	endothelial	11	10	10	20	100	76.9231	100	86.9565	0.229249
651	COL4A1--epithelial--CD93--myeloid	COL4A1	epithelial	CD93	myeloid	8	10	10	20	72.7273	76.9231	100	86.9565	0.229249
1030	CDH1--epithelial--EGFR--endothelial	CDH1	epithelial	EGFR	endothelial	9	10	10	20	81.8182	76.9231	100	86.9565	0.229249
1254	CCL5--lymphocyte--ACKR1--myeloid	CCL5	lymphocyte	ACKR1	myeloid	10	10	10	20	90.9091	76.9231	100	86.9565	0.229249
1268	MYL9--myeloid--CD69--lymphocyte	MYL9	myeloid	CD69	lymphocyte	9	10	10	20	81.8182	76.9231	100	86.9565	0.229249
1270	MYL9--epithelial--CD69--lymphocyte	MYL9	epithelial	CD69	lymphocyte	7	10	10	20	63.6364	76.9231	100	86.9565	0.229249
1295	CCL5--lymphocyte--ACKR1--lymphocyte	CCL5	lymphocyte	ACKR1	lymphocyte	9	10	10	20	81.8182	76.9231	100	86.9565	0.229249
1322	CCL5--lymphocyte--ACKR1--stromal	CCL5	lymphocyte	ACKR1	stromal	11	10	10	20	100	76.9231	100	86.9565	0.229249
1853	TNF--endothelial--FLT4--endothelial	TNF	endothelial	FLT4	endothelial	6	10	10	20	54.5455	76.9231	100	86.9565	0.229249
2039	COL1A2--stromal--CD93--stromal	COL1A2	stromal	CD93	stromal	10	10	10	20	90.9091	76.9231	100	86.9565	0.229249
2604	LILRB4--myeloid--LAIR1--stromal	LILRB4	myeloid	LAIR1	stromal	9	10	10	20	81.8182	76.9231	100	86.9565	0.229249
2745	LRPAP1--lymphocyte--LDLR--epithelial	LRPAP1	lymphocyte	LDLR	epithelial	9	10	10	20	81.8182	76.9231	100	86.9565	0.229249
2822	WNT5A--lymphocyte--LDLR--epithelial	WNT5A	lymphocyte	LDLR	epithelial	7	10	10	20	63.6364	76.9231	100	86.9565	0.229249
2639	CD22--myeloid--PTPRC--stromal	CD22	myeloid	PTPRC	stromal	2	1	3	4	18.1818	7.69231	30	17.3913	0.280632
2660	HBEGF--endothelial--PRLR--lymphocyte	HBEGF	endothelial	PRLR	lymphocyte	4	1	3	4	36.3636	7.69231	30	17.3913	0.280632
2737	HBEGF--epithelial--CD44--lymphocyte	HBEGF	epithelial	CD44	lymphocyte	1	1	3	4	9.09091	7.69231	30	17.3913	0.280632
2828	LAMB1--myeloid--CD44--myeloid	LAMB1	myeloid	CD44	myeloid	3	1	3	4	27.2727	7.69231	30	17.3913	0.280632
2840	FGF2--stromal--SDC4--myeloid	FGF2	stromal	SDC4	myeloid	4	1	3	4	36.3636	7.69231	30	17.3913	0.280632
2854	THBS1--stromal--CD47--stromal	THBS1	stromal	CD47	stromal	4	1	3	4	36.3636	7.69231	30	17.3913	0.280632
2885	IL1B--epithelial--IL1R1--epithelial	IL1B	epithelial	IL1R1	epithelial	2	1	3	4	18.1818	7.69231	30	17.3913	0.280632
3125	LPL--endothelial--CD44--lymphocyte	LPL	endothelial	CD44	lymphocyte	3	1	3	4	27.2727	7.69231	30	17.3913	0.280632
3510	SELE--lymphocyte--CEACAM1--epithelial	SELE	lymphocyte	CEACAM1	epithelial	2	1	3	4	18.1818	7.69231	30	17.3913	0.280632
3542	CXCL8--myeloid--ACKR1--myeloid	CXCL8	myeloid	ACKR1	myeloid	3	1	3	4	27.2727	7.69231	30	17.3913	0.280632
3556	LAMC3--lymphocyte--ITGB4--endothelial	LAMC3	lymphocyte	ITGB4	endothelial	5	1	3	4	45.4545	7.69231	30	17.3913	0.280632
3559	LAMC2--endothelial--ITGB4--endothelial	LAMC2	endothelial	ITGB4	endothelial	4	1	3	4	36.3636	7.69231	30	17.3913	0.280632
3574	LAMB3--endothelial--ITGB4--endothelial	LAMB3	endothelial	ITGB4	endothelial	4	1	3	4	36.3636	7.69231	30	17.3913	0.280632
3582	LAMA3--lymphocyte--ITGB4--endothelial	LAMA3	lymphocyte	ITGB4	endothelial	4	1	3	4	36.3636	7.69231	30	17.3913	0.280632
3815	CXCL8--myeloid--KDR--myeloid	CXCL8	myeloid	KDR	myeloid	3	1	3	4	27.2727	7.69231	30	17.3913	0.280632
4001	RPS19--lymphocyte--C5AR1--endothelial	RPS19	lymphocyte	C5AR1	endothelial	2	1	3	4	18.1818	7.69231	30	17.3913	0.280632
4102	LAMA4--endothelial--ITGB4--stromal	LAMA4	endothelial	ITGB4	stromal	2	1	3	4	18.1818	7.69231	30	17.3913	0.280632
4164	CSF3--epithelial--CSF1R--epithelial	CSF3	epithelial	CSF1R	epithelial	1	1	3	4	9.09091	7.69231	30	17.3913	0.280632
4169	CSF3--epithelial--CSF3R--stromal	CSF3	epithelial	CSF3R	stromal	1	1	3	4	9.09091	7.69231	30	17.3913	0.280632
4179	CSF3--epithelial--CSF1R--stromal	CSF3	epithelial	CSF1R	stromal	1	1	3	4	9.09091	7.69231	30	17.3913	0.280632
4185	CSF3--epithelial--CSF2RA--stromal	CSF3	epithelial	CSF2RA	stromal	1	1	3	4	9.09091	7.69231	30	17.3913	0.280632
4186	CSF3--epithelial--CSF2RA--lymphocyte	CSF3	epithelial	CSF2RA	lymphocyte	1	1	3	4	9.09091	7.69231	30	17.3913	0.280632
4428	B2M--myeloid--LILRB1--stromal	B2M	myeloid	LILRB1	stromal	3	1	3	4	27.2727	7.69231	30	17.3913	0.280632
269	CD59--endothelial--STAB1--endothelial	CD59	endothelial	STAB1	endothelial	11	12	7	19	100	92.3077	70	82.6087	0.280632
285	CD59--endothelial--STAB1--lymphocyte	CD59	endothelial	STAB1	lymphocyte	11	12	7	19	100	92.3077	70	82.6087	0.280632
321	CD59--endothelial--STAB1--stromal	CD59	endothelial	STAB1	stromal	11	12	7	19	100	92.3077	70	82.6087	0.280632
333	CD59--endothelial--CD2--myeloid	CD59	endothelial	CD2	myeloid	10	12	7	19	90.9091	92.3077	70	82.6087	0.280632
363	CD59--endothelial--CD2--epithelial	CD59	endothelial	CD2	epithelial	10	12	7	19	90.9091	92.3077	70	82.6087	0.280632
414	C3--epithelial--ITGAX--lymphocyte	C3	epithelial	ITGAX	lymphocyte	6	12	7	19	54.5455	92.3077	70	82.6087	0.280632
484	SEMA5A--myeloid--MET--epithelial	SEMA5A	myeloid	MET	epithelial	10	12	7	19	90.9091	92.3077	70	82.6087	0.280632
519	APOE--stromal--ABCA1--myeloid	APOE	stromal	ABCA1	myeloid	10	12	7	19	90.9091	92.3077	70	82.6087	0.280632
632	FGF9--epithelial--FGFR1--stromal	FGF9	epithelial	FGFR1	stromal	9	12	7	19	81.8182	92.3077	70	82.6087	0.280632
694	SELE--endothelial--CEACAM1--epithelial	SELE	endothelial	CEACAM1	epithelial	8	12	7	19	72.7273	92.3077	70	82.6087	0.280632
722	SELE--endothelial--CD44--stromal	SELE	endothelial	CD44	stromal	10	12	7	19	90.9091	92.3077	70	82.6087	0.280632
742	SELE--endothelial--CD44--lymphocyte	SELE	endothelial	CD44	lymphocyte	10	12	7	19	90.9091	92.3077	70	82.6087	0.280632
784	SELE--endothelial--CEACAM1--stromal	SELE	endothelial	CEACAM1	stromal	10	12	7	19	90.9091	92.3077	70	82.6087	0.280632
827	B2M--stromal--TFRC--myeloid	B2M	stromal	TFRC	myeloid	8	12	7	19	72.7273	92.3077	70	82.6087	0.280632
835	THBS1--myeloid--TNFRSF11B--endothelial	THBS1	myeloid	TNFRSF11B	endothelial	10	12	7	19	90.9091	92.3077	70	82.6087	0.280632
933	IL6--lymphocyte--HRH1--epithelial	IL6	lymphocyte	HRH1	epithelial	8	12	7	19	72.7273	92.3077	70	82.6087	0.280632
934	HGF--stromal--NRP1--endothelial	HGF	stromal	NRP1	endothelial	8	12	7	19	72.7273	92.3077	70	82.6087	0.280632
964	FGF2--stromal--NRP1--endothelial	FGF2	stromal	NRP1	endothelial	9	12	7	19	81.8182	92.3077	70	82.6087	0.280632
1245	IL6--epithelial--HRH1--epithelial	IL6	epithelial	HRH1	epithelial	8	12	7	19	72.7273	92.3077	70	82.6087	0.280632
1260	THBS1--myeloid--TNFRSF11B--myeloid	THBS1	myeloid	TNFRSF11B	myeloid	11	12	7	19	100	92.3077	70	82.6087	0.280632
1416	VEGFA--myeloid--CD44--lymphocyte	VEGFA	myeloid	CD44	lymphocyte	10	12	7	19	90.9091	92.3077	70	82.6087	0.280632
1562	FGF7--stromal--NRP1--endothelial	FGF7	stromal	NRP1	endothelial	11	12	7	19	100	92.3077	70	82.6087	0.280632
1835	FGF2--stromal--CD44--lymphocyte	FGF2	stromal	CD44	lymphocyte	9	12	7	19	81.8182	92.3077	70	82.6087	0.280632
1872	THBS2--myeloid--ITGA4--lymphocyte	THBS2	myeloid	ITGA4	lymphocyte	8	12	7	19	72.7273	92.3077	70	82.6087	0.280632
2059	HGF--stromal--NRP1--stromal	HGF	stromal	NRP1	stromal	9	12	7	19	81.8182	92.3077	70	82.6087	0.280632
2113	EFNA5--stromal--EPHA7--stromal	EFNA5	stromal	EPHA7	stromal	9	12	7	19	81.8182	92.3077	70	82.6087	0.280632
883	IL33--endothelial--IL1RAP--endothelial	IL33	endothelial	IL1RAP	endothelial	4	4	1	5	36.3636	30.7692	10	21.7391	0.339356
893	NCAM1--lymphocyte--FGFR1--endothelial	NCAM1	lymphocyte	FGFR1	endothelial	0	4	1	5	0	30.7692	10	21.7391	0.339356
1151	C3--myeloid--NRP1--myeloid	C3	myeloid	NRP1	myeloid	0	4	1	5	0	30.7692	10	21.7391	0.339356
1164	MDK--stromal--PTPRZ1--myeloid	MDK	stromal	PTPRZ1	myeloid	4	4	1	5	36.3636	30.7692	10	21.7391	0.339356
1336	ALCAM--endothelial--NRP1--myeloid	ALCAM	endothelial	NRP1	myeloid	1	4	1	5	9.09091	30.7692	10	21.7391	0.339356
1466	TAC1--epithelial--FAP--stromal	TAC1	epithelial	FAP	stromal	3	4	1	5	27.2727	30.7692	10	21.7391	0.339356
1498	RARRES1--myeloid--NRP2--endothelial	RARRES1	myeloid	NRP2	endothelial	0	4	1	5	0	30.7692	10	21.7391	0.339356
1586	S100A4--endothelial--EGFR--stromal	S100A4	endothelial	EGFR	stromal	5	4	1	5	45.4545	30.7692	10	21.7391	0.339356
1595	SPON2--stromal--ITGA5--epithelial	SPON2	stromal	ITGA5	epithelial	1	4	1	5	9.09091	30.7692	10	21.7391	0.339356
1655	CXCL12--endothelial--ACKR3--myeloid	CXCL12	endothelial	ACKR3	myeloid	7	4	1	5	63.6364	30.7692	10	21.7391	0.339356
1668	RARRES1--lymphocyte--NRP2--endothelial	RARRES1	lymphocyte	NRP2	endothelial	1	4	1	5	9.09091	30.7692	10	21.7391	0.339356
1706	PDGFB--stromal--PDGFRB--stromal	PDGFB	stromal	PDGFRB	stromal	1	4	1	5	9.09091	30.7692	10	21.7391	0.339356
1905	CXCL12--stromal--AVPR1A--epithelial	CXCL12	stromal	AVPR1A	epithelial	1	4	1	5	9.09091	30.7692	10	21.7391	0.339356
1907	ADAM23--epithelial--ITGA4--myeloid	ADAM23	epithelial	ITGA4	myeloid	0	4	1	5	0	30.7692	10	21.7391	0.339356
1917	CXCL12--endothelial--ITGA5--myeloid	CXCL12	endothelial	ITGA5	myeloid	4	4	1	5	36.3636	30.7692	10	21.7391	0.339356
1955	GZMA--myeloid--F2R--stromal	GZMA	myeloid	F2R	stromal	1	4	1	5	9.09091	30.7692	10	21.7391	0.339356
1994	DCN--stromal--TLR2--epithelial	DCN	stromal	TLR2	epithelial	2	4	1	5	18.1818	30.7692	10	21.7391	0.339356
2051	COMP--endothelial--ITGA5--endothelial	COMP	endothelial	ITGA5	endothelial	2	4	1	5	18.1818	30.7692	10	21.7391	0.339356
2139	HSP90AA1--lymphocyte--CFTR--endothelial	HSP90AA1	lymphocyte	CFTR	endothelial	4	4	1	5	36.3636	30.7692	10	21.7391	0.339356
2157	FBN1--epithelial--ITGA5--endothelial	FBN1	epithelial	ITGA5	endothelial	2	4	1	5	18.1818	30.7692	10	21.7391	0.339356
2190	CCN2--epithelial--EGFR--stromal	CCN2	epithelial	EGFR	stromal	1	4	1	5	9.09091	30.7692	10	21.7391	0.339356
2210	COL4A1--stromal--CD93--epithelial	COL4A1	stromal	CD93	epithelial	3	4	1	5	27.2727	30.7692	10	21.7391	0.339356
2237	PLTP--epithelial--ABCA1--stromal	PLTP	epithelial	ABCA1	stromal	1	4	1	5	9.09091	30.7692	10	21.7391	0.339356
2274	FGF7--lymphocyte--NRP1--endothelial	FGF7	lymphocyte	NRP1	endothelial	2	4	1	5	18.1818	30.7692	10	21.7391	0.339356
2304	BMP2--stromal--RGMB--stromal	BMP2	stromal	RGMB	stromal	4	4	1	5	36.3636	30.7692	10	21.7391	0.339356
2330	ANGPTL4--myeloid--CDH5--epithelial	ANGPTL4	myeloid	CDH5	epithelial	0	4	1	5	0	30.7692	10	21.7391	0.339356
2367	CCL20--epithelial--CCR6--epithelial	CCL20	epithelial	CCR6	epithelial	0	4	1	5	0	30.7692	10	21.7391	0.339356
2418	PTN--stromal--PTPRZ1--epithelial	PTN	stromal	PTPRZ1	epithelial	2	4	1	5	18.1818	30.7692	10	21.7391	0.339356
2431	THBS2--epithelial--ITGA6--endothelial	THBS2	epithelial	ITGA6	endothelial	3	4	1	5	27.2727	30.7692	10	21.7391	0.339356
2491	BMP2--myeloid--RGMB--epithelial	BMP2	myeloid	RGMB	epithelial	3	4	1	5	27.2727	30.7692	10	21.7391	0.339356
2667	B2M--endothelial--LILRB2--epithelial	B2M	endothelial	LILRB2	epithelial	4	4	1	5	36.3636	30.7692	10	21.7391	0.339356
2671	B2M--endothelial--LILRB2--stromal	B2M	endothelial	LILRB2	stromal	5	4	1	5	45.4545	30.7692	10	21.7391	0.339356
2685	B2M--endothelial--LILRB2--endothelial	B2M	endothelial	LILRB2	endothelial	4	4	1	5	36.3636	30.7692	10	21.7391	0.339356
2688	B2M--endothelial--CD247--myeloid	B2M	endothelial	CD247	myeloid	4	4	1	5	36.3636	30.7692	10	21.7391	0.339356
2711	B2M--endothelial--KLRD1--stromal	B2M	endothelial	KLRD1	stromal	5	4	1	5	45.4545	30.7692	10	21.7391	0.339356
2863	CCL2--myeloid--ACKR1--stromal	CCL2	myeloid	ACKR1	stromal	1	4	1	5	9.09091	30.7692	10	21.7391	0.339356
2963	APOE--myeloid--LDLR--myeloid	APOE	myeloid	LDLR	myeloid	0	4	1	5	0	30.7692	10	21.7391	0.339356
2973	HLA-A--epithelial--LILRB1--lymphocyte	HLA-A	epithelial	LILRB1	lymphocyte	0	4	1	5	0	30.7692	10	21.7391	0.339356
2981	APOE--myeloid--LDLR--lymphocyte	APOE	myeloid	LDLR	lymphocyte	0	4	1	5	0	30.7692	10	21.7391	0.339356
3004	FN1--stromal--CD44--epithelial	FN1	stromal	CD44	epithelial	4	4	1	5	36.3636	30.7692	10	21.7391	0.339356
3023	PGF--endothelial--KDR--epithelial	PGF	endothelial	KDR	epithelial	2	4	1	5	18.1818	30.7692	10	21.7391	0.339356
3025	CXCL14--stromal--CXCR4--stromal	CXCL14	stromal	CXCR4	stromal	0	4	1	5	0	30.7692	10	21.7391	0.339356
3095	S100A8--stromal--CD36--myeloid	S100A8	stromal	CD36	myeloid	2	4	1	5	18.1818	30.7692	10	21.7391	0.339356
3177	S100A8--myeloid--CD36--myeloid	S100A8	myeloid	CD36	myeloid	2	4	1	5	18.1818	30.7692	10	21.7391	0.339356
3186	IL1B--myeloid--IL1RAP--endothelial	IL1B	myeloid	IL1RAP	endothelial	1	4	1	5	9.09091	30.7692	10	21.7391	0.339356
3204	B2M--endothelial--KLRC2--endothelial	B2M	endothelial	KLRC2	endothelial	4	4	1	5	36.3636	30.7692	10	21.7391	0.339356
3236	B2M--endothelial--CD3G--endothelial	B2M	endothelial	CD3G	endothelial	3	4	1	5	27.2727	30.7692	10	21.7391	0.339356
3490	COL1A1--epithelial--ITGA5--endothelial	COL1A1	epithelial	ITGA5	endothelial	2	4	1	5	18.1818	30.7692	10	21.7391	0.339356
3527	PDGFB--endothelial--PDGFRA--endothelial	PDGFB	endothelial	PDGFRA	endothelial	0	4	1	5	0	30.7692	10	21.7391	0.339356
3713	WNT7A--endothelial--LDLR--endothelial	WNT7A	endothelial	LDLR	endothelial	2	4	1	5	18.1818	30.7692	10	21.7391	0.339356
3765	VEGFA--lymphocyte--GRIN2B--epithelial	VEGFA	lymphocyte	GRIN2B	epithelial	1	4	1	5	9.09091	30.7692	10	21.7391	0.339356
3781	ADAM12--lymphocyte--SDC4--epithelial	ADAM12	lymphocyte	SDC4	epithelial	2	4	1	5	18.1818	30.7692	10	21.7391	0.339356
3783	CCN1--lymphocyte--SDC4--epithelial	CCN1	lymphocyte	SDC4	epithelial	1	4	1	5	9.09091	30.7692	10	21.7391	0.339356
3785	CCN1--myeloid--SDC4--epithelial	CCN1	myeloid	SDC4	epithelial	1	4	1	5	9.09091	30.7692	10	21.7391	0.339356
3790	THBS1--lymphocyte--SDC4--epithelial	THBS1	lymphocyte	SDC4	epithelial	1	4	1	5	9.09091	30.7692	10	21.7391	0.339356
3847	HSP90AA1--lymphocyte--EGFR--epithelial	HSP90AA1	lymphocyte	EGFR	epithelial	2	4	1	5	18.1818	30.7692	10	21.7391	0.339356
3858	CSF1--epithelial--CSF2RA--endothelial	CSF1	epithelial	CSF2RA	endothelial	1	4	1	5	9.09091	30.7692	10	21.7391	0.339356
3926	S100A8--stromal--CD69--myeloid	S100A8	stromal	CD69	myeloid	1	4	1	5	9.09091	30.7692	10	21.7391	0.339356
4010	TNF--endothelial--TNFRSF1B--endothelial	TNF	endothelial	TNFRSF1B	endothelial	1	4	1	5	9.09091	30.7692	10	21.7391	0.339356
4085	FN1--endothelial--ITGA2--epithelial	FN1	endothelial	ITGA2	epithelial	4	4	1	5	36.3636	30.7692	10	21.7391	0.339356
465	CCL2--endothelial--ACKR1--endothelial	CCL2	endothelial	ACKR1	endothelial	11	9	9	18	100	69.2308	90	78.2609	0.339356
889	PLAU--stromal--PLAUR--myeloid	PLAU	stromal	PLAUR	myeloid	9	9	9	18	81.8182	69.2308	90	78.2609	0.339356
1039	CCL5--lymphocyte--SDC4--endothelial	CCL5	lymphocyte	SDC4	endothelial	7	9	9	18	63.6364	69.2308	90	78.2609	0.339356
1147	HSP90AA1--lymphocyte--EGFR--stromal	HSP90AA1	lymphocyte	EGFR	stromal	10	9	9	18	90.9091	69.2308	90	78.2609	0.339356
1956	HSP90AA1--stromal--CFTR--epithelial	HSP90AA1	stromal	CFTR	epithelial	6	9	9	18	54.5455	69.2308	90	78.2609	0.339356
2283	COL1A2--lymphocyte--CD36--endothelial	COL1A2	lymphocyte	CD36	endothelial	4	9	9	18	36.3636	69.2308	90	78.2609	0.339356
2317	FN1--endothelial--FLT4--endothelial	FN1	endothelial	FLT4	endothelial	6	9	9	18	54.5455	69.2308	90	78.2609	0.339356
2672	WNT7A--lymphocyte--LDLR--epithelial	WNT7A	lymphocyte	LDLR	epithelial	9	9	9	18	81.8182	69.2308	90	78.2609	0.339356
3578	WNT7A--myeloid--LDLR--epithelial	WNT7A	myeloid	LDLR	epithelial	7	9	9	18	63.6364	69.2308	90	78.2609	0.339356
2286	SELE--stromal--CEACAM1--epithelial	SELE	stromal	CEACAM1	epithelial	2	2	4	6	18.1818	15.3846	40	26.087	0.341288
2549	LAMB3--myeloid--ITGB4--endothelial	LAMB3	myeloid	ITGB4	endothelial	6	2	4	6	54.5455	15.3846	40	26.087	0.341288
2596	LAMC2--myeloid--ITGB4--endothelial	LAMC2	myeloid	ITGB4	endothelial	6	2	4	6	54.5455	15.3846	40	26.087	0.341288
2669	PRG4--stromal--TLR4--epithelial	PRG4	stromal	TLR4	epithelial	1	2	4	6	9.09091	15.3846	40	26.087	0.341288
2684	COL4A1--epithelial--CD44--lymphocyte	COL4A1	epithelial	CD44	lymphocyte	1	2	4	6	9.09091	15.3846	40	26.087	0.341288
2712	LAMC2--stromal--CD44--lymphocyte	LAMC2	stromal	CD44	lymphocyte	4	2	4	6	36.3636	15.3846	40	26.087	0.341288
2891	IL15--epithelial--IL2RA--stromal	IL15	epithelial	IL2RA	stromal	0	2	4	6	0	15.3846	40	26.087	0.341288
2962	IL15--endothelial--IL2RA--lymphocyte	IL15	endothelial	IL2RA	lymphocyte	4	2	4	6	36.3636	15.3846	40	26.087	0.341288
3548	LAMC2--lymphocyte--ITGB4--endothelial	LAMC2	lymphocyte	ITGB4	endothelial	5	2	4	6	45.4545	15.3846	40	26.087	0.341288
3565	SPN--myeloid--SIGLEC1--lymphocyte	SPN	myeloid	SIGLEC1	lymphocyte	1	2	4	6	9.09091	15.3846	40	26.087	0.341288
3567	LAMC2--stromal--ITGB4--endothelial	LAMC2	stromal	ITGB4	endothelial	5	2	4	6	45.4545	15.3846	40	26.087	0.341288
3572	LAMB3--stromal--ITGB4--endothelial	LAMB3	stromal	ITGB4	endothelial	5	2	4	6	45.4545	15.3846	40	26.087	0.341288
3583	ECM1--lymphocyte--ITGB4--endothelial	ECM1	lymphocyte	ITGB4	endothelial	4	2	4	6	36.3636	15.3846	40	26.087	0.341288
3590	LAMB3--lymphocyte--ITGB4--endothelial	LAMB3	lymphocyte	ITGB4	endothelial	4	2	4	6	36.3636	15.3846	40	26.087	0.341288
3593	IL33--lymphocyte--IL1RAP--myeloid	IL33	lymphocyte	IL1RAP	myeloid	0	2	4	6	0	15.3846	40	26.087	0.341288
4009	PLA2G2A--stromal--ERBB3--myeloid	PLA2G2A	stromal	ERBB3	myeloid	5	2	4	6	45.4545	15.3846	40	26.087	0.341288
440	ADAM12--stromal--SDC4--epithelial	ADAM12	stromal	SDC4	epithelial	9	11	6	17	81.8182	84.6154	60	73.913	0.341288
452	MDK--stromal--SDC4--epithelial	MDK	stromal	SDC4	epithelial	9	11	6	17	81.8182	84.6154	60	73.913	0.341288
503	TIMP3--myeloid--MET--epithelial	TIMP3	myeloid	MET	epithelial	10	11	6	17	90.9091	84.6154	60	73.913	0.341288
517	TGM2--endothelial--SDC4--epithelial	TGM2	endothelial	SDC4	epithelial	10	11	6	17	90.9091	84.6154	60	73.913	0.341288
562	HBEGF--myeloid--CD44--endothelial	HBEGF	myeloid	CD44	endothelial	9	11	6	17	81.8182	84.6154	60	73.913	0.341288
578	PGF--myeloid--NRP2--epithelial	PGF	myeloid	NRP2	epithelial	9	11	6	17	81.8182	84.6154	60	73.913	0.341288
581	IGF1--stromal--IGF1R--epithelial	IGF1	stromal	IGF1R	epithelial	9	11	6	17	81.8182	84.6154	60	73.913	0.341288
594	DCN--lymphocyte--MET--epithelial	DCN	lymphocyte	MET	epithelial	10	11	6	17	90.9091	84.6154	60	73.913	0.341288
677	SEMA3A--epithelial--NRP2--epithelial	SEMA3A	epithelial	NRP2	epithelial	9	11	6	17	81.8182	84.6154	60	73.913	0.341288
699	CCN2--lymphocyte--FGFR2--epithelial	CCN2	lymphocyte	FGFR2	epithelial	7	11	6	17	63.6364	84.6154	60	73.913	0.341288
727	SEMA3A--lymphocyte--NRP2--epithelial	SEMA3A	lymphocyte	NRP2	epithelial	9	11	6	17	81.8182	84.6154	60	73.913	0.341288
735	SEMA3A--myeloid--NRP2--epithelial	SEMA3A	myeloid	NRP2	epithelial	9	11	6	17	81.8182	84.6154	60	73.913	0.341288
923	PTN--stromal--SDC4--epithelial	PTN	stromal	SDC4	epithelial	8	11	6	17	72.7273	84.6154	60	73.913	0.341288
950	CXCL12--stromal--SDC4--epithelial	CXCL12	stromal	SDC4	epithelial	8	11	6	17	72.7273	84.6154	60	73.913	0.341288
1004	ALCAM--epithelial--NRP1--myeloid	ALCAM	epithelial	NRP1	myeloid	6	11	6	17	54.5455	84.6154	60	73.913	0.341288
1033	PLTP--epithelial--ABCA1--myeloid	PLTP	epithelial	ABCA1	myeloid	7	11	6	17	63.6364	84.6154	60	73.913	0.341288
1075	TNC--stromal--SDC4--epithelial	TNC	stromal	SDC4	epithelial	9	11	6	17	81.8182	84.6154	60	73.913	0.341288
1168	RSPO3--stromal--SDC4--epithelial	RSPO3	stromal	SDC4	epithelial	8	11	6	17	72.7273	84.6154	60	73.913	0.341288
1278	COL1A1--stromal--FLT4--epithelial	COL1A1	stromal	FLT4	epithelial	9	11	6	17	81.8182	84.6154	60	73.913	0.341288
1320	EFNB2--endothelial--EPHA3--stromal	EFNB2	endothelial	EPHA3	stromal	10	11	6	17	90.9091	84.6154	60	73.913	0.341288
1396	ANGPTL4--stromal--SDC4--epithelial	ANGPTL4	stromal	SDC4	epithelial	8	11	6	17	72.7273	84.6154	60	73.913	0.341288
1422	ICAM1--lymphocyte--IL2RA--myeloid	ICAM1	lymphocyte	IL2RA	myeloid	9	11	6	17	81.8182	84.6154	60	73.913	0.341288
1729	VEGFA--myeloid--GRIN2B--stromal	VEGFA	myeloid	GRIN2B	stromal	10	11	6	17	90.9091	84.6154	60	73.913	0.341288
1904	FN1--stromal--TNFRSF11B--endothelial	FN1	stromal	TNFRSF11B	endothelial	7	11	6	17	63.6364	84.6154	60	73.913	0.341288
1929	THBS2--stromal--ITGA6--lymphocyte	THBS2	stromal	ITGA6	lymphocyte	7	11	6	17	63.6364	84.6154	60	73.913	0.341288
1941	THBS2--epithelial--ITGA4--lymphocyte	THBS2	epithelial	ITGA4	lymphocyte	7	11	6	17	63.6364	84.6154	60	73.913	0.341288
1965	LPL--lymphocyte--CD44--myeloid	LPL	lymphocyte	CD44	myeloid	8	11	6	17	72.7273	84.6154	60	73.913	0.341288
2150	HLA-A--epithelial--LILRB1--myeloid	HLA-A	epithelial	LILRB1	myeloid	5	11	6	17	45.4545	84.6154	60	73.913	0.341288
2432	BGN--stromal--TLR4--stromal	BGN	stromal	TLR4	stromal	8	11	6	17	72.7273	84.6154	60	73.913	0.341288
783	HGF--myeloid--NRP1--myeloid	HGF	myeloid	NRP1	myeloid	2	6	2	8	18.1818	46.1538	20	34.7826	0.378786
1060	ADM--endothelial--ACKR3--epithelial	ADM	endothelial	ACKR3	epithelial	2	6	2	8	18.1818	46.1538	20	34.7826	0.378786
1271	FBN1--endothelial--ITGA5--endothelial	FBN1	endothelial	ITGA5	endothelial	5	6	2	8	45.4545	46.1538	20	34.7826	0.378786
1587	WNT5A--stromal--FZD4--endothelial	WNT5A	stromal	FZD4	endothelial	9	6	2	8	81.8182	46.1538	20	34.7826	0.378786
1782	CCN1--epithelial--ITGA5--endothelial	CCN1	epithelial	ITGA5	endothelial	2	6	2	8	18.1818	46.1538	20	34.7826	0.378786
1792	COMP--myeloid--ITGA5--endothelial	COMP	myeloid	ITGA5	endothelial	2	6	2	8	18.1818	46.1538	20	34.7826	0.378786
1859	CD14--stromal--ITGA4--myeloid	CD14	stromal	ITGA4	myeloid	1	6	2	8	9.09091	46.1538	20	34.7826	0.378786
1922	EFNA5--endothelial--EPHA3--myeloid	EFNA5	endothelial	EPHA3	myeloid	0	6	2	8	0	46.1538	20	34.7826	0.378786
2001	PLA2G2A--lymphocyte--EGFR--stromal	PLA2G2A	lymphocyte	EGFR	stromal	3	6	2	8	27.2727	46.1538	20	34.7826	0.378786
2006	COL4A2--endothelial--CD93--stromal	COL4A2	endothelial	CD93	stromal	3	6	2	8	27.2727	46.1538	20	34.7826	0.378786
2079	TNF--lymphocyte--FLT4--myeloid	TNF	lymphocyte	FLT4	myeloid	3	6	2	8	27.2727	46.1538	20	34.7826	0.378786
2191	CXCL3--epithelial--ACKR1--lymphocyte	CXCL3	epithelial	ACKR1	lymphocyte	5	6	2	8	45.4545	46.1538	20	34.7826	0.378786
2203	SEMA4A--myeloid--LILRB2--epithelial	SEMA4A	myeloid	LILRB2	epithelial	3	6	2	8	27.2727	46.1538	20	34.7826	0.378786
2205	PTN--stromal--PTPRZ1--endothelial	PTN	stromal	PTPRZ1	endothelial	3	6	2	8	27.2727	46.1538	20	34.7826	0.378786
2242	TNC--stromal--ITGA5--myeloid	TNC	stromal	ITGA5	myeloid	3	6	2	8	27.2727	46.1538	20	34.7826	0.378786
2255	VEGFA--stromal--GRIN2B--lymphocyte	VEGFA	stromal	GRIN2B	lymphocyte	6	6	2	8	54.5455	46.1538	20	34.7826	0.378786
2302	GZMA--lymphocyte--F2R--epithelial	GZMA	lymphocyte	F2R	epithelial	3	6	2	8	27.2727	46.1538	20	34.7826	0.378786
2395	TNC--stromal--PTPRB--myeloid	TNC	stromal	PTPRB	myeloid	3	6	2	8	27.2727	46.1538	20	34.7826	0.378786
2538	HLA-A--endothelial--CD8A--myeloid	HLA-A	endothelial	CD8A	myeloid	5	6	2	8	45.4545	46.1538	20	34.7826	0.378786
2566	HLA-A--endothelial--CD3G--myeloid	HLA-A	endothelial	CD3G	myeloid	5	6	2	8	45.4545	46.1538	20	34.7826	0.378786
2641	EFEMP1--epithelial--EGFR--stromal	EFEMP1	epithelial	EGFR	stromal	7	6	2	8	63.6364	46.1538	20	34.7826	0.378786
2643	B2M--endothelial--KLRD1--myeloid	B2M	endothelial	KLRD1	myeloid	3	6	2	8	27.2727	46.1538	20	34.7826	0.378786
2740	ACE--stromal--BDKRB2--endothelial	ACE	stromal	BDKRB2	endothelial	4	6	2	8	36.3636	46.1538	20	34.7826	0.378786
2750	FGF7--stromal--FGFR2--lymphocyte	FGF7	stromal	FGFR2	lymphocyte	9	6	2	8	81.8182	46.1538	20	34.7826	0.378786
3506	CDH1--endothelial--KLRG1--lymphocyte	CDH1	endothelial	KLRG1	lymphocyte	3	6	2	8	27.2727	46.1538	20	34.7826	0.378786
3514	LAMA3--epithelial--ITGA6--myeloid	LAMA3	epithelial	ITGA6	myeloid	4	6	2	8	36.3636	46.1538	20	34.7826	0.378786
3777	SLPI--myeloid--PLSCR1--epithelial	SLPI	myeloid	PLSCR1	epithelial	4	6	2	8	36.3636	46.1538	20	34.7826	0.378786
3796	SLPI--endothelial--PLSCR1--epithelial	SLPI	endothelial	PLSCR1	epithelial	4	6	2	8	36.3636	46.1538	20	34.7826	0.378786
3839	CSF1--epithelial--CSF3R--lymphocyte	CSF1	epithelial	CSF3R	lymphocyte	3	6	2	8	27.2727	46.1538	20	34.7826	0.378786
3840	C3--epithelial--C5AR2--endothelial	C3	epithelial	C5AR2	endothelial	2	6	2	8	18.1818	46.1538	20	34.7826	0.378786
3851	MXRA5--epithelial--CD69--myeloid	MXRA5	epithelial	CD69	myeloid	0	6	2	8	0	46.1538	20	34.7826	0.378786
3864	CSF1--epithelial--CSF3R--stromal	CSF1	epithelial	CSF3R	stromal	3	6	2	8	27.2727	46.1538	20	34.7826	0.378786
3925	EDN1--epithelial--EDNRA--epithelial	EDN1	epithelial	EDNRA	epithelial	3	6	2	8	27.2727	46.1538	20	34.7826	0.378786
150	B2M--epithelial--KLRC1--lymphocyte	B2M	epithelial	KLRC1	lymphocyte	4	7	8	15	36.3636	53.8462	80	65.2174	0.378786
518	LAMC2--epithelial--ITGB4--stromal	LAMC2	epithelial	ITGB4	stromal	9	7	8	15	81.8182	53.8462	80	65.2174	0.378786
1988	PLA2G2A--stromal--ITGA4--myeloid	PLA2G2A	stromal	ITGA4	myeloid	9	7	8	15	81.8182	53.8462	80	65.2174	0.378786
2233	CCL20--lymphocyte--CCR6--epithelial	CCL20	lymphocyte	CCR6	epithelial	5	7	8	15	45.4545	53.8462	80	65.2174	0.378786
2488	PDGFB--endothelial--PDGFRA--stromal	PDGFB	endothelial	PDGFRA	stromal	9	7	8	15	81.8182	53.8462	80	65.2174	0.378786
2625	HLA-A--epithelial--CD3G--lymphocyte	HLA-A	epithelial	CD3G	lymphocyte	9	7	8	15	81.8182	53.8462	80	65.2174	0.378786
2647	LAMA4--endothelial--CD44--lymphocyte	LAMA4	endothelial	CD44	lymphocyte	6	7	8	15	54.5455	53.8462	80	65.2174	0.378786
2764	IGHG1--endothelial--FCGR2B--myeloid	IGHG1	endothelial	FCGR2B	myeloid	8	7	8	15	72.7273	53.8462	80	65.2174	0.378786
2939	ADAM23--lymphocyte--ITGA4--epithelial	ADAM23	lymphocyte	ITGA4	epithelial	5	7	8	15	45.4545	53.8462	80	65.2174	0.378786
2958	COL1A1--lymphocyte--CD36--endothelial	COL1A1	lymphocyte	CD36	endothelial	4	7	8	15	36.3636	53.8462	80	65.2174	0.378786
1894	CXCL3--myeloid--ACKR1--epithelial	CXCL3	myeloid	ACKR1	epithelial	6	6	7	13	54.5455	46.1538	70	56.5217	0.401535
2181	SERPINE1--stromal--PLAUR--stromal	SERPINE1	stromal	PLAUR	stromal	9	6	7	13	81.8182	46.1538	70	56.5217	0.401535
2450	COMP--stromal--CD36--myeloid	COMP	stromal	CD36	myeloid	7	6	7	13	63.6364	46.1538	70	56.5217	0.401535
2522	LAMA3--epithelial--ITGB4--endothelial	LAMA3	epithelial	ITGB4	endothelial	8	6	7	13	72.7273	46.1538	70	56.5217	0.401535
2598	COL4A1--epithelial--CD47--lymphocyte	COL4A1	epithelial	CD47	lymphocyte	2	6	7	13	18.1818	46.1538	70	56.5217	0.401535
2746	RPS19--lymphocyte--C5AR1--stromal	RPS19	lymphocyte	C5AR1	stromal	6	6	7	13	54.5455	46.1538	70	56.5217	0.401535
2858	TNF--endothelial--TNFRSF1B--lymphocyte	TNF	endothelial	TNFRSF1B	lymphocyte	4	6	7	13	36.3636	46.1538	70	56.5217	0.401535
672	PLAU--myeloid--PLAUR--endothelial	PLAU	myeloid	PLAUR	endothelial	4	7	3	10	36.3636	53.8462	30	43.4783	0.401535
748	PLAU--myeloid--ITGA3--myeloid	PLAU	myeloid	ITGA3	myeloid	6	7	3	10	54.5455	53.8462	30	43.4783	0.401535
779	TNFSF10--epithelial--TNFRSF11B--epithelial	TNFSF10	epithelial	TNFRSF11B	epithelial	5	7	3	10	45.4545	53.8462	30	43.4783	0.401535
993	COMP--endothelial--CD47--epithelial	COMP	endothelial	CD47	epithelial	4	7	3	10	36.3636	53.8462	30	43.4783	0.401535
1267	VEGFA--epithelial--NRP1--myeloid	VEGFA	epithelial	NRP1	myeloid	0	7	3	10	0	53.8462	30	43.4783	0.401535
1325	EDN1--endothelial--ADGRL4--epithelial	EDN1	endothelial	ADGRL4	epithelial	4	7	3	10	36.3636	53.8462	30	43.4783	0.401535
1358	SERPINE1--myeloid--PLAUR--myeloid	SERPINE1	myeloid	PLAUR	myeloid	5	7	3	10	45.4545	53.8462	30	43.4783	0.401535
1409	EDN1--endothelial--ADGRL4--lymphocyte	EDN1	endothelial	ADGRL4	lymphocyte	6	7	3	10	54.5455	53.8462	30	43.4783	0.401535
1411	COL3A1--stromal--DDR2--myeloid	COL3A1	stromal	DDR2	myeloid	5	7	3	10	45.4545	53.8462	30	43.4783	0.401535
1438	EDN1--endothelial--EDNRB--lymphocyte	EDN1	endothelial	EDNRB	lymphocyte	4	7	3	10	36.3636	53.8462	30	43.4783	0.401535
1444	IL6--stromal--F3--epithelial	IL6	stromal	F3	epithelial	4	7	3	10	36.3636	53.8462	30	43.4783	0.401535
1499	ANGPTL4--endothelial--CDH11--stromal	ANGPTL4	endothelial	CDH11	stromal	5	7	3	10	45.4545	53.8462	30	43.4783	0.401535
1701	COL1A1--stromal--DDR2--lymphocyte	COL1A1	stromal	DDR2	lymphocyte	6	7	3	10	54.5455	53.8462	30	43.4783	0.401535
1708	NRG1--epithelial--EGFR--stromal	NRG1	epithelial	EGFR	stromal	8	7	3	10	72.7273	53.8462	30	43.4783	0.401535
1719	LGALS1--lymphocyte--PTPRC--myeloid	LGALS1	lymphocyte	PTPRC	myeloid	2	7	3	10	18.1818	53.8462	30	43.4783	0.401535
1733	CXCL12--lymphocyte--ITGA5--endothelial	CXCL12	lymphocyte	ITGA5	endothelial	4	7	3	10	36.3636	53.8462	30	43.4783	0.401535
1739	CXCL8--epithelial--KDR--epithelial	CXCL8	epithelial	KDR	epithelial	5	7	3	10	45.4545	53.8462	30	43.4783	0.401535
1766	IL11--endothelial--IL6R--myeloid	IL11	endothelial	IL6R	myeloid	5	7	3	10	45.4545	53.8462	30	43.4783	0.401535
1769	ICAM4--stromal--ITGA4--myeloid	ICAM4	stromal	ITGA4	myeloid	2	7	3	10	18.1818	53.8462	30	43.4783	0.401535
1857	COL4A2--stromal--CD93--lymphocyte	COL4A2	stromal	CD93	lymphocyte	5	7	3	10	45.4545	53.8462	30	43.4783	0.401535
1876	COL1A1--stromal--ITGA5--lymphocyte	COL1A1	stromal	ITGA5	lymphocyte	5	7	3	10	45.4545	53.8462	30	43.4783	0.401535
2012	ICAM1--endothelial--SPN--myeloid	ICAM1	endothelial	SPN	myeloid	5	7	3	10	45.4545	53.8462	30	43.4783	0.401535
2014	COMP--epithelial--ITGA5--endothelial	COMP	epithelial	ITGA5	endothelial	3	7	3	10	27.2727	53.8462	30	43.4783	0.401535
2049	EDN1--epithelial--ADGRL4--lymphocyte	EDN1	epithelial	ADGRL4	lymphocyte	2	7	3	10	18.1818	53.8462	30	43.4783	0.401535
2128	TNF--epithelial--FLT4--epithelial	TNF	epithelial	FLT4	epithelial	2	7	3	10	18.1818	53.8462	30	43.4783	0.401535
2189	EFNA5--epithelial--EPHA7--stromal	EFNA5	epithelial	EPHA7	stromal	1	7	3	10	9.09091	53.8462	30	43.4783	0.401535
2218	FGF9--myeloid--FGFR1--stromal	FGF9	myeloid	FGFR1	stromal	7	7	3	10	63.6364	53.8462	30	43.4783	0.401535
2219	SPP1--lymphocyte--CD44--myeloid	SPP1	lymphocyte	CD44	myeloid	7	7	3	10	63.6364	53.8462	30	43.4783	0.401535
2258	IL11--myeloid--IL6R--epithelial	IL11	myeloid	IL6R	epithelial	9	7	3	10	81.8182	53.8462	30	43.4783	0.401535
2268	CXCL3--epithelial--ACKR1--epithelial	CXCL3	epithelial	ACKR1	epithelial	3	7	3	10	27.2727	53.8462	30	43.4783	0.401535
2341	PTGS2--stromal--CAV1--stromal	PTGS2	stromal	CAV1	stromal	3	7	3	10	27.2727	53.8462	30	43.4783	0.401535
2345	IL11--lymphocyte--IL6R--epithelial	IL11	lymphocyte	IL6R	epithelial	7	7	3	10	63.6364	53.8462	30	43.4783	0.401535
2552	IGF1--epithelial--INSR--endothelial	IGF1	epithelial	INSR	endothelial	7	7	3	10	63.6364	53.8462	30	43.4783	0.401535
2561	HLA-A--endothelial--LILRB1--stromal	HLA-A	endothelial	LILRB1	stromal	7	7	3	10	63.6364	53.8462	30	43.4783	0.401535
2582	HLA-A--endothelial--CD3G--stromal	HLA-A	endothelial	CD3G	stromal	5	7	3	10	45.4545	53.8462	30	43.4783	0.401535
2591	HLA-A--endothelial--CD3G--epithelial	HLA-A	endothelial	CD3G	epithelial	5	7	3	10	45.4545	53.8462	30	43.4783	0.401535
2642	VEGFA--epithelial--CD44--lymphocyte	VEGFA	epithelial	CD44	lymphocyte	1	7	3	10	9.09091	53.8462	30	43.4783	0.401535
3140	ANXA1--myeloid--EGFR--epithelial	ANXA1	myeloid	EGFR	epithelial	4	7	3	10	36.3636	53.8462	30	43.4783	0.401535
3682	FN1--epithelial--PLAUR--epithelial	FN1	epithelial	PLAUR	epithelial	3	7	3	10	27.2727	53.8462	30	43.4783	0.401535
3774	SPP1--epithelial--CD44--epithelial	SPP1	epithelial	CD44	epithelial	5	7	3	10	45.4545	53.8462	30	43.4783	0.401535
3841	C3--epithelial--ITGAX--stromal	C3	epithelial	ITGAX	stromal	2	7	3	10	18.1818	53.8462	30	43.4783	0.401535
3887	PLA2G2A--stromal--ERBB3--lymphocyte	PLA2G2A	stromal	ERBB3	lymphocyte	5	7	3	10	45.4545	53.8462	30	43.4783	0.401535
3908	IGF1--endothelial--ITGA6--epithelial	IGF1	endothelial	ITGA6	epithelial	6	7	3	10	54.5455	53.8462	30	43.4783	0.401535
3936	S100A8--lymphocyte--TLR4--stromal	S100A8	lymphocyte	TLR4	stromal	3	7	3	10	27.2727	53.8462	30	43.4783	0.401535
436	ACE--epithelial--BDKRB2--stromal	ACE	epithelial	BDKRB2	stromal	2	5	2	7	18.1818	38.4615	20	30.4348	0.405034
1068	COL3A1--stromal--DDR2--endothelial	COL3A1	stromal	DDR2	endothelial	5	5	2	7	45.4545	38.4615	20	30.4348	0.405034
1108	TNFSF10--epithelial--CCR6--endothelial	TNFSF10	epithelial	CCR6	endothelial	2	5	2	7	18.1818	38.4615	20	30.4348	0.405034
1235	PGF--endothelial--KDR--lymphocyte	PGF	endothelial	KDR	lymphocyte	5	5	2	7	45.4545	38.4615	20	30.4348	0.405034
1319	HGF--lymphocyte--NRP1--myeloid	HGF	lymphocyte	NRP1	myeloid	1	5	2	7	9.09091	38.4615	20	30.4348	0.405034
1332	ADAM12--stromal--SDC4--lymphocyte	ADAM12	stromal	SDC4	lymphocyte	3	5	2	7	27.2727	38.4615	20	30.4348	0.405034
1357	C3--endothelial--C5AR2--myeloid	C3	endothelial	C5AR2	myeloid	2	5	2	7	18.1818	38.4615	20	30.4348	0.405034
1370	CCN2--endothelial--EGFR--stromal	CCN2	endothelial	EGFR	stromal	5	5	2	7	45.4545	38.4615	20	30.4348	0.405034
1459	ANXA1--epithelial--EGFR--myeloid	ANXA1	epithelial	EGFR	myeloid	3	5	2	7	27.2727	38.4615	20	30.4348	0.405034
1502	ANXA1--epithelial--EGFR--endothelial	ANXA1	epithelial	EGFR	endothelial	5	5	2	7	45.4545	38.4615	20	30.4348	0.405034
1618	ALCAM--myeloid--CHL1--myeloid	ALCAM	myeloid	CHL1	myeloid	5	5	2	7	45.4545	38.4615	20	30.4348	0.405034
1746	F13A1--stromal--ITGA4--myeloid	F13A1	stromal	ITGA4	myeloid	1	5	2	7	9.09091	38.4615	20	30.4348	0.405034
1747	COL4A1--stromal--CD47--endothelial	COL4A1	stromal	CD47	endothelial	5	5	2	7	45.4545	38.4615	20	30.4348	0.405034
1764	IL6--lymphocyte--F3--epithelial	IL6	lymphocyte	F3	epithelial	0	5	2	7	0	38.4615	20	30.4348	0.405034
1784	FBN1--myeloid--ITGA5--endothelial	FBN1	myeloid	ITGA5	endothelial	3	5	2	7	27.2727	38.4615	20	30.4348	0.405034
1788	TIMP3--stromal--MET--stromal	TIMP3	stromal	MET	stromal	3	5	2	7	27.2727	38.4615	20	30.4348	0.405034
1808	NAMPT--endothelial--INSR--stromal	NAMPT	endothelial	INSR	stromal	2	5	2	7	18.1818	38.4615	20	30.4348	0.405034
2016	PLA2G2A--endothelial--ITGA5--endothelial	PLA2G2A	endothelial	ITGA5	endothelial	2	5	2	7	18.1818	38.4615	20	30.4348	0.405034
2030	TNF--epithelial--FLT4--myeloid	TNF	epithelial	FLT4	myeloid	1	5	2	7	9.09091	38.4615	20	30.4348	0.405034
2034	CCN1--stromal--TLR2--lymphocyte	CCN1	stromal	TLR2	lymphocyte	4	5	2	7	36.3636	38.4615	20	30.4348	0.405034
2056	PRG4--epithelial--CD44--lymphocyte	PRG4	epithelial	CD44	lymphocyte	5	5	2	7	45.4545	38.4615	20	30.4348	0.405034
2065	FGF9--epithelial--FGFR1--lymphocyte	FGF9	epithelial	FGFR1	lymphocyte	1	5	2	7	9.09091	38.4615	20	30.4348	0.405034
2081	THBS1--epithelial--ITGA6--endothelial	THBS1	epithelial	ITGA6	endothelial	4	5	2	7	36.3636	38.4615	20	30.4348	0.405034
2116	PLA2G2A--epithelial--ITGA5--endothelial	PLA2G2A	epithelial	ITGA5	endothelial	2	5	2	7	18.1818	38.4615	20	30.4348	0.405034
2124	FN1--lymphocyte--ITGA6--endothelial	FN1	lymphocyte	ITGA6	endothelial	7	5	2	7	63.6364	38.4615	20	30.4348	0.405034
2220	FN1--epithelial--ITGA6--endothelial	FN1	epithelial	ITGA6	endothelial	6	5	2	7	54.5455	38.4615	20	30.4348	0.405034
2224	SEMA4A--myeloid--LILRB2--lymphocyte	SEMA4A	myeloid	LILRB2	lymphocyte	3	5	2	7	27.2727	38.4615	20	30.4348	0.405034
2282	SEMA4A--myeloid--LILRB2--stromal	SEMA4A	myeloid	LILRB2	stromal	3	5	2	7	27.2727	38.4615	20	30.4348	0.405034
2314	ICAM1--myeloid--IL2RA--epithelial	ICAM1	myeloid	IL2RA	epithelial	1	5	2	7	9.09091	38.4615	20	30.4348	0.405034
2427	CCN4--stromal--ITGA5--myeloid	CCN4	stromal	ITGA5	myeloid	4	5	2	7	36.3636	38.4615	20	30.4348	0.405034
2454	PLA2G2A--stromal--ITGA5--myeloid	PLA2G2A	stromal	ITGA5	myeloid	3	5	2	7	27.2727	38.4615	20	30.4348	0.405034
2468	FGF7--stromal--FGFR1--endothelial	FGF7	stromal	FGFR1	endothelial	4	5	2	7	36.3636	38.4615	20	30.4348	0.405034
2597	HLA-A--endothelial--LILRB2--endothelial	HLA-A	endothelial	LILRB2	endothelial	6	5	2	7	54.5455	38.4615	20	30.4348	0.405034
2683	PLTP--myeloid--ABCA1--epithelial	PLTP	myeloid	ABCA1	epithelial	5	5	2	7	45.4545	38.4615	20	30.4348	0.405034
2820	FGF2--epithelial--CD44--myeloid	FGF2	epithelial	CD44	myeloid	5	5	2	7	45.4545	38.4615	20	30.4348	0.405034
2867	FGF2--epithelial--FGFR1--stromal	FGF2	epithelial	FGFR1	stromal	3	5	2	7	27.2727	38.4615	20	30.4348	0.405034
2965	NLGN4X--endothelial--NRXN1--stromal	NLGN4X	endothelial	NRXN1	stromal	1	5	2	7	9.09091	38.4615	20	30.4348	0.405034
2978	LGALS1--endothelial--PTPRC--myeloid	LGALS1	endothelial	PTPRC	myeloid	3	5	2	7	27.2727	38.4615	20	30.4348	0.405034
3011	FGF7--stromal--FGFR2--endothelial	FGF7	stromal	FGFR2	endothelial	6	5	2	7	54.5455	38.4615	20	30.4348	0.405034
3072	WNT5A--lymphocyte--EPHA7--stromal	WNT5A	lymphocyte	EPHA7	stromal	1	5	2	7	9.09091	38.4615	20	30.4348	0.405034
3092	S100A8--epithelial--CD36--myeloid	S100A8	epithelial	CD36	myeloid	1	5	2	7	9.09091	38.4615	20	30.4348	0.405034
3174	FGF18--endothelial--FGFR1--stromal	FGF18	endothelial	FGFR1	stromal	5	5	2	7	45.4545	38.4615	20	30.4348	0.405034
3387	PLA2G2A--stromal--EGFR--epithelial	PLA2G2A	stromal	EGFR	epithelial	3	5	2	7	27.2727	38.4615	20	30.4348	0.405034
3525	GREM1--stromal--KDR--epithelial	GREM1	stromal	KDR	epithelial	1	5	2	7	9.09091	38.4615	20	30.4348	0.405034
3570	S100A4--lymphocyte--ERBB3--endothelial	S100A4	lymphocyte	ERBB3	endothelial	5	5	2	7	45.4545	38.4615	20	30.4348	0.405034
3599	ICAM1--myeloid--EGFR--epithelial	ICAM1	myeloid	EGFR	epithelial	2	5	2	7	18.1818	38.4615	20	30.4348	0.405034
3607	ICAM1--myeloid--MUC1--stromal	ICAM1	myeloid	MUC1	stromal	4	5	2	7	36.3636	38.4615	20	30.4348	0.405034
3666	S100A8--myeloid--CD69--myeloid	S100A8	myeloid	CD69	myeloid	2	5	2	7	18.1818	38.4615	20	30.4348	0.405034
3769	MDK--endothelial--SDC4--epithelial	MDK	endothelial	SDC4	epithelial	2	5	2	7	18.1818	38.4615	20	30.4348	0.405034
3797	ALCAM--epithelial--CHL1--endothelial	ALCAM	epithelial	CHL1	endothelial	4	5	2	7	36.3636	38.4615	20	30.4348	0.405034
3801	ALCAM--epithelial--CD6--myeloid	ALCAM	epithelial	CD6	myeloid	2	5	2	7	18.1818	38.4615	20	30.4348	0.405034
3899	LAMB3--endothelial--ITGA6--epithelial	LAMB3	endothelial	ITGA6	epithelial	5	5	2	7	45.4545	38.4615	20	30.4348	0.405034
3915	IL1B--myeloid--IL1R2--epithelial	IL1B	myeloid	IL1R2	epithelial	2	5	2	7	18.1818	38.4615	20	30.4348	0.405034
3933	C3--epithelial--ITGAX--epithelial	C3	epithelial	ITGAX	epithelial	2	5	2	7	18.1818	38.4615	20	30.4348	0.405034
106	B2M--stromal--KLRC1--lymphocyte	B2M	stromal	KLRC1	lymphocyte	3	8	8	16	27.2727	61.5385	80	69.5652	0.405034
603	LAMB3--epithelial--ITGB4--lymphocyte	LAMB3	epithelial	ITGB4	lymphocyte	9	8	8	16	81.8182	61.5385	80	69.5652	0.405034
655	LAMC2--epithelial--ITGB4--endothelial	LAMC2	epithelial	ITGB4	endothelial	8	8	8	16	72.7273	61.5385	80	69.5652	0.405034
690	LAMB3--epithelial--ITGB4--endothelial	LAMB3	epithelial	ITGB4	endothelial	8	8	8	16	72.7273	61.5385	80	69.5652	0.405034
1042	DCN--endothelial--TLR4--myeloid	DCN	endothelial	TLR4	myeloid	4	8	8	16	36.3636	61.5385	80	69.5652	0.405034
1216	TIMP3--stromal--CD44--lymphocyte	TIMP3	stromal	CD44	lymphocyte	10	8	8	16	90.9091	61.5385	80	69.5652	0.405034
1398	COL4A1--myeloid--CD93--myeloid	COL4A1	myeloid	CD93	myeloid	7	8	8	16	63.6364	61.5385	80	69.5652	0.405034
1426	PGF--endothelial--NRP2--stromal	PGF	endothelial	NRP2	stromal	9	8	8	16	81.8182	61.5385	80	69.5652	0.405034
1457	CCL5--lymphocyte--SDC4--myeloid	CCL5	lymphocyte	SDC4	myeloid	11	8	8	16	100	61.5385	80	69.5652	0.405034
1632	COL1A2--endothelial--CD36--endothelial	COL1A2	endothelial	CD36	endothelial	3	8	8	16	27.2727	61.5385	80	69.5652	0.405034
2521	SPN--lymphocyte--SIGLEC1--lymphocyte	SPN	lymphocyte	SIGLEC1	lymphocyte	9	8	8	16	81.8182	61.5385	80	69.5652	0.405034
2601	LILRB4--myeloid--LAIR1--epithelial	LILRB4	myeloid	LAIR1	epithelial	8	8	8	16	72.7273	61.5385	80	69.5652	0.405034
2812	HBEGF--stromal--CD44--myeloid	HBEGF	stromal	CD44	myeloid	9	8	8	16	81.8182	61.5385	80	69.5652	0.405034
2922	CCL20--lymphocyte--CCR6--stromal	CCL20	lymphocyte	CCR6	stromal	4	8	8	16	36.3636	61.5385	80	69.5652	0.405034
3553	PDGFB--myeloid--PDGFRA--stromal	PDGFB	myeloid	PDGFRA	stromal	7	8	8	16	63.6364	61.5385	80	69.5652	0.405034
3705	APOE--epithelial--LDLR--epithelial	APOE	epithelial	LDLR	epithelial	8	8	8	16	72.7273	61.5385	80	69.5652	0.405034
3711	LRPAP1--endothelial--LDLR--epithelial	LRPAP1	endothelial	LDLR	epithelial	6	8	8	16	54.5455	61.5385	80	69.5652	0.405034
478	CCL14--endothelial--ACKR1--myeloid	CCL14	endothelial	ACKR1	myeloid	9	5	6	11	81.8182	38.4615	60	47.8261	0.413649
2025	ALCAM--myeloid--NRP1--epithelial	ALCAM	myeloid	NRP1	epithelial	7	5	6	11	63.6364	38.4615	60	47.8261	0.413649
2612	COL4A4--epithelial--CD47--lymphocyte	COL4A4	epithelial	CD47	lymphocyte	2	5	6	11	18.1818	38.4615	60	47.8261	0.413649
2638	TNF--lymphocyte--TRPM2--lymphocyte	TNF	lymphocyte	TRPM2	lymphocyte	5	5	6	11	45.4545	38.4615	60	47.8261	0.413649
2769	LAMA4--endothelial--ITGB4--endothelial	LAMA4	endothelial	ITGB4	endothelial	7	5	6	11	63.6364	38.4615	60	47.8261	0.413649
405	B2M--stromal--KLRC2--lymphocyte	B2M	stromal	KLRC2	lymphocyte	5	8	4	12	45.4545	61.5385	40	52.1739	0.413649
734	IL33--endothelial--IL1RL1--lymphocyte	IL33	endothelial	IL1RL1	lymphocyte	7	8	4	12	63.6364	61.5385	40	52.1739	0.413649
812	TNFSF10--epithelial--TNFRSF11B--lymphocyte	TNFSF10	epithelial	TNFRSF11B	lymphocyte	6	8	4	12	54.5455	61.5385	40	52.1739	0.413649
837	TNFSF10--epithelial--TNFRSF11B--myeloid	TNFSF10	epithelial	TNFRSF11B	myeloid	5	8	4	12	45.4545	61.5385	40	52.1739	0.413649
844	COMP--lymphocyte--CD47--epithelial	COMP	lymphocyte	CD47	epithelial	7	8	4	12	63.6364	61.5385	40	52.1739	0.413649
853	C3--myeloid--C5AR2--myeloid	C3	myeloid	C5AR2	myeloid	7	8	4	12	63.6364	61.5385	40	52.1739	0.413649
865	FGF9--epithelial--FGFR1--epithelial	FGF9	epithelial	FGFR1	epithelial	3	8	4	12	27.2727	61.5385	40	52.1739	0.413649
967	PGF--stromal--KDR--endothelial	PGF	stromal	KDR	endothelial	4	8	4	12	36.3636	61.5385	40	52.1739	0.413649
1046	FGF9--epithelial--FGFR2--endothelial	FGF9	epithelial	FGFR2	endothelial	4	8	4	12	36.3636	61.5385	40	52.1739	0.413649
1119	HGF--myeloid--NRP1--endothelial	HGF	myeloid	NRP1	endothelial	6	8	4	12	54.5455	61.5385	40	52.1739	0.413649
1162	EFNB2--endothelial--PECAM1--epithelial	EFNB2	endothelial	PECAM1	epithelial	6	8	4	12	54.5455	61.5385	40	52.1739	0.413649
1190	TFPI--endothelial--F3--stromal	TFPI	endothelial	F3	stromal	6	8	4	12	54.5455	61.5385	40	52.1739	0.413649
1228	PGF--lymphocyte--KDR--endothelial	PGF	lymphocyte	KDR	endothelial	4	8	4	12	36.3636	61.5385	40	52.1739	0.413649
1273	EDN1--endothelial--EDNRB--myeloid	EDN1	endothelial	EDNRB	myeloid	4	8	4	12	36.3636	61.5385	40	52.1739	0.413649
1324	CEACAM1--myeloid--HAVCR2--lymphocyte	CEACAM1	myeloid	HAVCR2	lymphocyte	3	8	4	12	27.2727	61.5385	40	52.1739	0.413649
1351	EFNB2--endothelial--EPHA3--endothelial	EFNB2	endothelial	EPHA3	endothelial	11	8	4	12	100	61.5385	40	52.1739	0.413649
1482	COL1A1--stromal--CD93--epithelial	COL1A1	stromal	CD93	epithelial	5	8	4	12	45.4545	61.5385	40	52.1739	0.413649
1500	FN1--lymphocyte--PLAUR--myeloid	FN1	lymphocyte	PLAUR	myeloid	7	8	4	12	63.6364	61.5385	40	52.1739	0.413649
1551	CXCL8--myeloid--KDR--stromal	CXCL8	myeloid	KDR	stromal	7	8	4	12	63.6364	61.5385	40	52.1739	0.413649
1722	EFNA5--endothelial--EPHA3--stromal	EFNA5	endothelial	EPHA3	stromal	5	8	4	12	45.4545	61.5385	40	52.1739	0.413649
1809	COL1A1--stromal--CD44--epithelial	COL1A1	stromal	CD44	epithelial	7	8	4	12	63.6364	61.5385	40	52.1739	0.413649
1942	CDH1--stromal--EGFR--stromal	CDH1	stromal	EGFR	stromal	7	8	4	12	63.6364	61.5385	40	52.1739	0.413649
2085	GZMA--lymphocyte--F2R--endothelial	GZMA	lymphocyte	F2R	endothelial	6	8	4	12	54.5455	61.5385	40	52.1739	0.413649
2097	SORBS1--epithelial--INSR--endothelial	SORBS1	epithelial	INSR	endothelial	7	8	4	12	63.6364	61.5385	40	52.1739	0.413649
2099	EDN1--epithelial--ADGRL4--stromal	EDN1	epithelial	ADGRL4	stromal	3	8	4	12	27.2727	61.5385	40	52.1739	0.413649
2162	LPL--endothelial--CD44--myeloid	LPL	endothelial	CD44	myeloid	7	8	4	12	63.6364	61.5385	40	52.1739	0.413649
2232	COL4A4--stromal--CD44--stromal	COL4A4	stromal	CD44	stromal	2	8	4	12	18.1818	61.5385	40	52.1739	0.413649
2356	C3--epithelial--C5AR2--epithelial	C3	epithelial	C5AR2	epithelial	3	8	4	12	27.2727	61.5385	40	52.1739	0.413649
2359	COL6A3--stromal--CD44--epithelial	COL6A3	stromal	CD44	epithelial	5	8	4	12	45.4545	61.5385	40	52.1739	0.413649
2360	ICAM1--myeloid--IL2RA--lymphocyte	ICAM1	myeloid	IL2RA	lymphocyte	6	8	4	12	54.5455	61.5385	40	52.1739	0.413649
2368	C3--epithelial--C5AR2--lymphocyte	C3	epithelial	C5AR2	lymphocyte	3	8	4	12	27.2727	61.5385	40	52.1739	0.413649
2577	HLA-A--endothelial--LILRB1--lymphocyte	HLA-A	endothelial	LILRB1	lymphocyte	7	8	4	12	63.6364	61.5385	40	52.1739	0.413649
2690	CCN2--stromal--EGFR--epithelial	CCN2	stromal	EGFR	epithelial	5	8	4	12	45.4545	61.5385	40	52.1739	0.413649
2856	IGF1--lymphocyte--INSR--endothelial	IGF1	lymphocyte	INSR	endothelial	7	8	4	12	63.6364	61.5385	40	52.1739	0.413649
3516	CDH1--lymphocyte--KLRG1--lymphocyte	CDH1	lymphocyte	KLRG1	lymphocyte	6	8	4	12	54.5455	61.5385	40	52.1739	0.413649
3772	SPP1--epithelial--S1PR1--stromal	SPP1	epithelial	S1PR1	stromal	5	8	4	12	45.4545	61.5385	40	52.1739	0.413649
3789	PLAU--endothelial--PLAUR--epithelial	PLAU	endothelial	PLAUR	epithelial	7	8	4	12	63.6364	61.5385	40	52.1739	0.413649
724	PDGFB--endothelial--PDGFRB--endothelial	PDGFB	endothelial	PDGFRB	endothelial	9	4	5	9	81.8182	30.7692	50	39.1304	0.417284
1958	CCN1--stromal--SDC4--myeloid	CCN1	stromal	SDC4	myeloid	6	4	5	9	54.5455	30.7692	50	39.1304	0.417284
2325	SPP1--stromal--CD44--lymphocyte	SPP1	stromal	CD44	lymphocyte	4	4	5	9	36.3636	30.7692	50	39.1304	0.417284
2571	S100A4--lymphocyte--ERBB3--stromal	S100A4	lymphocyte	ERBB3	stromal	4	4	5	9	36.3636	30.7692	50	39.1304	0.417284
2590	LAMC3--stromal--ITGB4--endothelial	LAMC3	stromal	ITGB4	endothelial	7	4	5	9	63.6364	30.7692	50	39.1304	0.417284
2966	COL1A1--endothelial--CD36--endothelial	COL1A1	endothelial	CD36	endothelial	3	4	5	9	27.2727	30.7692	50	39.1304	0.417284
3264	ANGPTL4--stromal--SDC4--stromal	ANGPTL4	stromal	SDC4	stromal	4	4	5	9	36.3636	30.7692	50	39.1304	0.417284
3712	WNT7A--stromal--LDLR--endothelial	WNT7A	stromal	LDLR	endothelial	2	4	5	9	18.1818	30.7692	50	39.1304	0.417284
3715	WNT7A--lymphocyte--LDLR--endothelial	WNT7A	lymphocyte	LDLR	endothelial	2	4	5	9	18.1818	30.7692	50	39.1304	0.417284
3782	BMP2--endothelial--RGMB--myeloid	BMP2	endothelial	RGMB	myeloid	1	4	5	9	9.09091	30.7692	50	39.1304	0.417284
3914	AREG--epithelial--ERBB3--endothelial	AREG	epithelial	ERBB3	endothelial	3	4	5	9	27.2727	30.7692	50	39.1304	0.417284
3923	AREG--epithelial--ERBB3--myeloid	AREG	epithelial	ERBB3	myeloid	2	4	5	9	18.1818	30.7692	50	39.1304	0.417284
813	PGF--stromal--NRP1--myeloid	PGF	stromal	NRP1	myeloid	2	9	5	14	18.1818	69.2308	50	60.8696	0.417284
829	TNFSF10--epithelial--TNFRSF11B--stromal	TNFSF10	epithelial	TNFRSF11B	stromal	5	9	5	14	45.4545	69.2308	50	60.8696	0.417284
874	COL1A1--stromal--CD36--epithelial	COL1A1	stromal	CD36	epithelial	7	9	5	14	63.6364	69.2308	50	60.8696	0.417284
877	TGM2--epithelial--SDC4--endothelial	TGM2	epithelial	SDC4	endothelial	6	9	5	14	54.5455	69.2308	50	60.8696	0.417284
885	LAMB1--stromal--ITGA1--endothelial	LAMB1	stromal	ITGA1	endothelial	11	9	5	14	100	69.2308	50	60.8696	0.417284
978	LAMC2--epithelial--CD44--endothelial	LAMC2	epithelial	CD44	endothelial	8	9	5	14	72.7273	69.2308	50	60.8696	0.417284
983	ADAM28--myeloid--ITGA4--endothelial	ADAM28	myeloid	ITGA4	endothelial	7	9	5	14	63.6364	69.2308	50	60.8696	0.417284
1181	IL1B--stromal--IL1R2--myeloid	IL1B	stromal	IL1R2	myeloid	5	9	5	14	45.4545	69.2308	50	60.8696	0.417284
1199	COL1A2--stromal--CD36--epithelial	COL1A2	stromal	CD36	epithelial	7	9	5	14	63.6364	69.2308	50	60.8696	0.417284
1285	APOE--myeloid--LDLR--endothelial	APOE	myeloid	LDLR	endothelial	7	9	5	14	63.6364	69.2308	50	60.8696	0.417284
1291	TGM2--epithelial--SDC4--lymphocyte	TGM2	epithelial	SDC4	lymphocyte	3	9	5	14	27.2727	69.2308	50	60.8696	0.417284
1300	C1QA--myeloid--CD93--epithelial	C1QA	myeloid	CD93	epithelial	6	9	5	14	54.5455	69.2308	50	60.8696	0.417284
1343	PGF--endothelial--NRP2--myeloid	PGF	endothelial	NRP2	myeloid	8	9	5	14	72.7273	69.2308	50	60.8696	0.417284
1477	BGN--stromal--TLR4--endothelial	BGN	stromal	TLR4	endothelial	8	9	5	14	72.7273	69.2308	50	60.8696	0.417284
1554	ADCYAP1--lymphocyte--VIPR2--stromal	ADCYAP1	lymphocyte	VIPR2	stromal	7	9	5	14	63.6364	69.2308	50	60.8696	0.417284
1645	SPP1--endothelial--S1PR1--lymphocyte	SPP1	endothelial	S1PR1	lymphocyte	2	9	5	14	18.1818	69.2308	50	60.8696	0.417284
1650	HBEGF--endothelial--CD44--myeloid	HBEGF	endothelial	CD44	myeloid	8	9	5	14	72.7273	69.2308	50	60.8696	0.417284
1776	HGF--stromal--CD44--lymphocyte	HGF	stromal	CD44	lymphocyte	9	9	5	14	81.8182	69.2308	50	60.8696	0.417284
1827	HSPA1A--stromal--TLR4--endothelial	HSPA1A	stromal	TLR4	endothelial	9	9	5	14	81.8182	69.2308	50	60.8696	0.417284
1855	CXCL2--epithelial--ACKR1--lymphocyte	CXCL2	epithelial	ACKR1	lymphocyte	5	9	5	14	45.4545	69.2308	50	60.8696	0.417284
1856	THBS1--myeloid--ITGA4--endothelial	THBS1	myeloid	ITGA4	endothelial	7	9	5	14	63.6364	69.2308	50	60.8696	0.417284
1882	THBS2--endothelial--CD36--endothelial	THBS2	endothelial	CD36	endothelial	4	9	5	14	36.3636	69.2308	50	60.8696	0.417284
1899	COL1A2--stromal--CD93--lymphocyte	COL1A2	stromal	CD93	lymphocyte	7	9	5	14	63.6364	69.2308	50	60.8696	0.417284
1986	BMP2--endothelial--RGMB--epithelial	BMP2	endothelial	RGMB	epithelial	4	9	5	14	36.3636	69.2308	50	60.8696	0.417284
2111	THBS1--lymphocyte--CD36--endothelial	THBS1	lymphocyte	CD36	endothelial	5	9	5	14	45.4545	69.2308	50	60.8696	0.417284
2154	HSP90AA1--myeloid--EGFR--epithelial	HSP90AA1	myeloid	EGFR	epithelial	6	9	5	14	54.5455	69.2308	50	60.8696	0.417284
2202	IL11--epithelial--IL6R--epithelial	IL11	epithelial	IL6R	epithelial	8	9	5	14	72.7273	69.2308	50	60.8696	0.417284
2472	THBS1--stromal--ITGA6--stromal	THBS1	stromal	ITGA6	stromal	7	9	5	14	63.6364	69.2308	50	60.8696	0.417284
2535	IGF1--endothelial--INSR--endothelial	IGF1	endothelial	INSR	endothelial	7	9	5	14	63.6364	69.2308	50	60.8696	0.417284
3575	S100A4--lymphocyte--ERBB3--lymphocyte	S100A4	lymphocyte	ERBB3	lymphocyte	2	9	5	14	18.1818	69.2308	50	60.8696	0.417284
2497	WNT5A--epithelial--FZD4--endothelial	WNT5A	epithelial	FZD4	endothelial	4	0	1	1	36.3636	0	10	4.34783	0.434783
2525	WNT5A--lymphocyte--FZD4--endothelial	WNT5A	lymphocyte	FZD4	endothelial	2	0	1	1	18.1818	0	10	4.34783	0.434783
2634	HGF--epithelial--MET--endothelial	HGF	epithelial	MET	endothelial	3	0	1	1	27.2727	0	10	4.34783	0.434783
2706	PLTP--endothelial--ABCA1--epithelial	PLTP	endothelial	ABCA1	epithelial	1	0	1	1	9.09091	0	10	4.34783	0.434783
2715	SEMA5A--epithelial--MET--stromal	SEMA5A	epithelial	MET	stromal	2	0	1	1	18.1818	0	10	4.34783	0.434783
2782	LAMA3--endothelial--CD44--stromal	LAMA3	endothelial	CD44	stromal	0	0	1	1	0	0	10	4.34783	0.434783
2879	VEGFA--stromal--EGFR--lymphocyte	VEGFA	stromal	EGFR	lymphocyte	0	0	1	1	0	0	10	4.34783	0.434783
2881	RSPO3--epithelial--SDC4--stromal	RSPO3	epithelial	SDC4	stromal	0	0	1	1	0	0	10	4.34783	0.434783
2884	VEGFA--stromal--EGFR--myeloid	VEGFA	stromal	EGFR	myeloid	0	0	1	1	0	0	10	4.34783	0.434783
2886	CXCL12--epithelial--SDC4--stromal	CXCL12	epithelial	SDC4	stromal	0	0	1	1	0	0	10	4.34783	0.434783
2890	WNT5A--lymphocyte--MCAM--epithelial	WNT5A	lymphocyte	MCAM	epithelial	0	0	1	1	0	0	10	4.34783	0.434783
2894	HGF--myeloid--NRP1--epithelial	HGF	myeloid	NRP1	epithelial	1	0	1	1	9.09091	0	10	4.34783	0.434783
2895	PGF--epithelial--NRP1--epithelial	PGF	epithelial	NRP1	epithelial	2	0	1	1	18.1818	0	10	4.34783	0.434783
2903	CCL5--stromal--SDC4--stromal	CCL5	stromal	SDC4	stromal	0	0	1	1	0	0	10	4.34783	0.434783
2925	CXCL12--epithelial--AVPR1A--stromal	CXCL12	epithelial	AVPR1A	stromal	0	0	1	1	0	0	10	4.34783	0.434783
2926	CXCL12--stromal--AVPR1A--endothelial	CXCL12	stromal	AVPR1A	endothelial	2	0	1	1	18.1818	0	10	4.34783	0.434783
2929	LGI4--stromal--ADAM22--epithelial	LGI4	stromal	ADAM22	epithelial	0	0	1	1	0	0	10	4.34783	0.434783
2932	ADAM12--epithelial--SDC4--stromal	ADAM12	epithelial	SDC4	stromal	0	0	1	1	0	0	10	4.34783	0.434783
2940	ADAM23--myeloid--ITGA5--stromal	ADAM23	myeloid	ITGA5	stromal	0	0	1	1	0	0	10	4.34783	0.434783
2944	LGI4--stromal--ADAM23--myeloid	LGI4	stromal	ADAM23	myeloid	0	0	1	1	0	0	10	4.34783	0.434783
2950	APOD--myeloid--LEPR--stromal	APOD	myeloid	LEPR	stromal	0	0	1	1	0	0	10	4.34783	0.434783
3623	VEGFA--myeloid--FLT1--endothelial	VEGFA	myeloid	FLT1	endothelial	1	0	1	1	9.09091	0	10	4.34783	0.434783
3631	PGF--endothelial--FLT1--endothelial	PGF	endothelial	FLT1	endothelial	1	0	1	1	9.09091	0	10	4.34783	0.434783
3633	VEGFA--stromal--FLT1--endothelial	VEGFA	stromal	FLT1	endothelial	1	0	1	1	9.09091	0	10	4.34783	0.434783
3638	VEGFA--epithelial--FLT1--endothelial	VEGFA	epithelial	FLT1	endothelial	1	0	1	1	9.09091	0	10	4.34783	0.434783
3641	NAMPT--endothelial--INSR--epithelial	NAMPT	endothelial	INSR	epithelial	0	0	1	1	0	0	10	4.34783	0.434783
3644	LRPAP1--myeloid--LDLR--stromal	LRPAP1	myeloid	LDLR	stromal	0	0	1	1	0	0	10	4.34783	0.434783
3645	PGF--epithelial--FLT1--endothelial	PGF	epithelial	FLT1	endothelial	1	0	1	1	9.09091	0	10	4.34783	0.434783
3646	B2M--epithelial--LILRB1--endothelial	B2M	epithelial	LILRB1	endothelial	0	0	1	1	0	0	10	4.34783	0.434783
3647	PGF--lymphocyte--FLT1--endothelial	PGF	lymphocyte	FLT1	endothelial	1	0	1	1	9.09091	0	10	4.34783	0.434783
3649	PGF--stromal--FLT1--endothelial	PGF	stromal	FLT1	endothelial	1	0	1	1	9.09091	0	10	4.34783	0.434783
3650	PGF--myeloid--FLT1--endothelial	PGF	myeloid	FLT1	endothelial	1	0	1	1	9.09091	0	10	4.34783	0.434783
3657	LRPAP1--myeloid--LDLR--myeloid	LRPAP1	myeloid	LDLR	myeloid	0	0	1	1	0	0	10	4.34783	0.434783
3664	NAMPT--endothelial--INSR--lymphocyte	NAMPT	endothelial	INSR	lymphocyte	0	0	1	1	0	0	10	4.34783	0.434783
3670	TNC--myeloid--PTPRZ1--stromal	TNC	myeloid	PTPRZ1	stromal	0	0	1	1	0	0	10	4.34783	0.434783
3677	CD59--epithelial--STAB1--epithelial	CD59	epithelial	STAB1	epithelial	0	0	1	1	0	0	10	4.34783	0.434783
3678	TNF--myeloid--TRPM2--epithelial	TNF	myeloid	TRPM2	epithelial	0	0	1	1	0	0	10	4.34783	0.434783
3680	WNT5A--myeloid--MCAM--stromal	WNT5A	myeloid	MCAM	stromal	0	0	1	1	0	0	10	4.34783	0.434783
3683	TNC--myeloid--ITGA5--stromal	TNC	myeloid	ITGA5	stromal	0	0	1	1	0	0	10	4.34783	0.434783
3684	CD59--epithelial--CD2--epithelial	CD59	epithelial	CD2	epithelial	0	0	1	1	0	0	10	4.34783	0.434783
3687	CD55--stromal--ADGRE2--stromal	CD55	stromal	ADGRE2	stromal	1	0	1	1	9.09091	0	10	4.34783	0.434783
3688	COMP--myeloid--ITGA5--stromal	COMP	myeloid	ITGA5	stromal	0	0	1	1	0	0	10	4.34783	0.434783
3689	WNT5A--lymphocyte--MCAM--stromal	WNT5A	lymphocyte	MCAM	stromal	0	0	1	1	0	0	10	4.34783	0.434783
3690	PSAP--stromal--AR--endothelial	PSAP	stromal	AR	endothelial	0	0	1	1	0	0	10	4.34783	0.434783
3692	TNF--myeloid--FLT4--epithelial	TNF	myeloid	FLT4	epithelial	0	0	1	1	0	0	10	4.34783	0.434783
3693	TNF--myeloid--FLT4--stromal	TNF	myeloid	FLT4	stromal	0	0	1	1	0	0	10	4.34783	0.434783
3695	TNC--myeloid--SDC4--stromal	TNC	myeloid	SDC4	stromal	0	0	1	1	0	0	10	4.34783	0.434783
3696	S100A8--epithelial--CD69--epithelial	S100A8	epithelial	CD69	epithelial	0	0	1	1	0	0	10	4.34783	0.434783
3697	S100A8--epithelial--CD69--endothelial	S100A8	epithelial	CD69	endothelial	0	0	1	1	0	0	10	4.34783	0.434783
3698	S100A8--epithelial--CD69--stromal	S100A8	epithelial	CD69	stromal	0	0	1	1	0	0	10	4.34783	0.434783
3699	EFNA5--epithelial--EPHA7--epithelial	EFNA5	epithelial	EPHA7	epithelial	0	0	1	1	0	0	10	4.34783	0.434783
3700	EFNA5--epithelial--EPHA7--lymphocyte	EFNA5	epithelial	EPHA7	lymphocyte	0	0	1	1	0	0	10	4.34783	0.434783
3710	EFNB2--epithelial--PECAM1--epithelial	EFNB2	epithelial	PECAM1	epithelial	0	0	1	1	0	0	10	4.34783	0.434783
3716	CD38--stromal--PECAM1--epithelial	CD38	stromal	PECAM1	epithelial	0	0	1	1	0	0	10	4.34783	0.434783
3717	CD38--epithelial--PECAM1--epithelial	CD38	epithelial	PECAM1	epithelial	0	0	1	1	0	0	10	4.34783	0.434783
3719	CD38--endothelial--PECAM1--epithelial	CD38	endothelial	PECAM1	epithelial	0	0	1	1	0	0	10	4.34783	0.434783
3722	CXCL1--stromal--ACKR1--epithelial	CXCL1	stromal	ACKR1	epithelial	0	0	1	1	0	0	10	4.34783	0.434783
3728	IGF1--stromal--ITGB4--myeloid	IGF1	stromal	ITGB4	myeloid	1	0	1	1	9.09091	0	10	4.34783	0.434783
3732	CXCL8--stromal--ACKR1--epithelial	CXCL8	stromal	ACKR1	epithelial	0	0	1	1	0	0	10	4.34783	0.434783
3734	CCL11--myeloid--ACKR1--epithelial	CCL11	myeloid	ACKR1	epithelial	0	0	1	1	0	0	10	4.34783	0.434783
3735	TNFSF10--stromal--CCR6--myeloid	TNFSF10	stromal	CCR6	myeloid	1	0	1	1	9.09091	0	10	4.34783	0.434783
3736	CCL11--lymphocyte--ACKR1--epithelial	CCL11	lymphocyte	ACKR1	epithelial	0	0	1	1	0	0	10	4.34783	0.434783
3737	BMP2--lymphocyte--RGMB--stromal	BMP2	lymphocyte	RGMB	stromal	0	0	1	1	0	0	10	4.34783	0.434783
3740	RSPO3--endothelial--RNF43--endothelial	RSPO3	endothelial	RNF43	endothelial	1	0	1	1	9.09091	0	10	4.34783	0.434783
3742	RSPO3--endothelial--RNF43--myeloid	RSPO3	endothelial	RNF43	myeloid	1	0	1	1	9.09091	0	10	4.34783	0.434783
3743	ANGPTL4--endothelial--SDC4--myeloid	ANGPTL4	endothelial	SDC4	myeloid	1	0	1	1	9.09091	0	10	4.34783	0.434783
3744	DEFB1--stromal--CCR6--epithelial	DEFB1	stromal	CCR6	epithelial	0	0	1	1	0	0	10	4.34783	0.434783
3750	DEFB1--myeloid--CCR6--myeloid	DEFB1	myeloid	CCR6	myeloid	1	0	1	1	9.09091	0	10	4.34783	0.434783
3751	RSPO3--epithelial--RNF43--lymphocyte	RSPO3	epithelial	RNF43	lymphocyte	0	0	1	1	0	0	10	4.34783	0.434783
3752	CCL20--endothelial--CCR6--myeloid	CCL20	endothelial	CCR6	myeloid	0	0	1	1	0	0	10	4.34783	0.434783
3754	CCL20--stromal--CCR6--myeloid	CCL20	stromal	CCR6	myeloid	1	0	1	1	9.09091	0	10	4.34783	0.434783
3756	RSPO3--endothelial--SDC4--myeloid	RSPO3	endothelial	SDC4	myeloid	1	0	1	1	9.09091	0	10	4.34783	0.434783
3757	RSPO3--epithelial--RNF43--myeloid	RSPO3	epithelial	RNF43	myeloid	0	0	1	1	0	0	10	4.34783	0.434783
3759	RSPO3--endothelial--SDC4--lymphocyte	RSPO3	endothelial	SDC4	lymphocyte	1	0	1	1	9.09091	0	10	4.34783	0.434783
4255	TAC1--stromal--FAP--endothelial	TAC1	stromal	FAP	endothelial	3	0	1	1	27.2727	0	10	4.34783	0.434783
4256	EFNA5--epithelial--EPHA3--endothelial	EFNA5	epithelial	EPHA3	endothelial	0	0	1	1	0	0	10	4.34783	0.434783
4258	PLA2G2A--stromal--ITGA5--lymphocyte	PLA2G2A	stromal	ITGA5	lymphocyte	3	0	1	1	27.2727	0	10	4.34783	0.434783
4259	TIMP3--epithelial--MET--endothelial	TIMP3	epithelial	MET	endothelial	2	0	1	1	18.1818	0	10	4.34783	0.434783
4260	ADM--myeloid--RAMP1--myeloid	ADM	myeloid	RAMP1	myeloid	2	0	1	1	18.1818	0	10	4.34783	0.434783
4263	WNT5A--endothelial--ANTXR1--stromal	WNT5A	endothelial	ANTXR1	stromal	1	0	1	1	9.09091	0	10	4.34783	0.434783
4264	RSPO3--stromal--RNF43--myeloid	RSPO3	stromal	RNF43	myeloid	1	0	1	1	9.09091	0	10	4.34783	0.434783
4265	EFNA5--epithelial--EPHA3--lymphocyte	EFNA5	epithelial	EPHA3	lymphocyte	0	0	1	1	0	0	10	4.34783	0.434783
4266	RSPO3--stromal--RNF43--endothelial	RSPO3	stromal	RNF43	endothelial	0	0	1	1	0	0	10	4.34783	0.434783
4267	WNT5A--endothelial--LDLR--stromal	WNT5A	endothelial	LDLR	stromal	0	0	1	1	0	0	10	4.34783	0.434783
4268	SEMA5A--lymphocyte--MET--endothelial	SEMA5A	lymphocyte	MET	endothelial	2	0	1	1	18.1818	0	10	4.34783	0.434783
4269	WNT5A--myeloid--ANTXR1--stromal	WNT5A	myeloid	ANTXR1	stromal	1	0	1	1	9.09091	0	10	4.34783	0.434783
4270	LAMB1--endothelial--ITGB4--lymphocyte	LAMB1	endothelial	ITGB4	lymphocyte	2	0	1	1	18.1818	0	10	4.34783	0.434783
4271	EFNB2--lymphocyte--PECAM1--myeloid	EFNB2	lymphocyte	PECAM1	myeloid	0	0	1	1	0	0	10	4.34783	0.434783
4272	WNT5A--myeloid--LDLR--stromal	WNT5A	myeloid	LDLR	stromal	0	0	1	1	0	0	10	4.34783	0.434783
4274	TFPI--myeloid--SDC4--stromal	TFPI	myeloid	SDC4	stromal	1	0	1	1	9.09091	0	10	4.34783	0.434783
4275	LRPAP1--lymphocyte--LDLR--stromal	LRPAP1	lymphocyte	LDLR	stromal	1	0	1	1	9.09091	0	10	4.34783	0.434783
4276	TNC--lymphocyte--ITGA5--stromal	TNC	lymphocyte	ITGA5	stromal	0	0	1	1	0	0	10	4.34783	0.434783
4277	WNT7A--stromal--LDLR--stromal	WNT7A	stromal	LDLR	stromal	0	0	1	1	0	0	10	4.34783	0.434783
4278	LAMB1--stromal--ITGB4--lymphocyte	LAMB1	stromal	ITGB4	lymphocyte	4	0	1	1	36.3636	0	10	4.34783	0.434783
4279	LAMA4--stromal--ITGB4--lymphocyte	LAMA4	stromal	ITGB4	lymphocyte	2	0	1	1	18.1818	0	10	4.34783	0.434783
4282	ICAM1--epithelial--IL2RA--epithelial	ICAM1	epithelial	IL2RA	epithelial	1	0	1	1	9.09091	0	10	4.34783	0.434783
4283	ICAM1--epithelial--CAV1--lymphocyte	ICAM1	epithelial	CAV1	lymphocyte	1	0	1	1	9.09091	0	10	4.34783	0.434783
4286	ICAM1--epithelial--MUC1--lymphocyte	ICAM1	epithelial	MUC1	lymphocyte	1	0	1	1	9.09091	0	10	4.34783	0.434783
4287	ICAM1--epithelial--SPN--endothelial	ICAM1	epithelial	SPN	endothelial	1	0	1	1	9.09091	0	10	4.34783	0.434783
4288	ICAM1--epithelial--IL2RA--endothelial	ICAM1	epithelial	IL2RA	endothelial	1	0	1	1	9.09091	0	10	4.34783	0.434783
4289	ICAM1--epithelial--MUC1--myeloid	ICAM1	epithelial	MUC1	myeloid	1	0	1	1	9.09091	0	10	4.34783	0.434783
4290	ICAM1--epithelial--MUC1--endothelial	ICAM1	epithelial	MUC1	endothelial	1	0	1	1	9.09091	0	10	4.34783	0.434783
4291	ICAM1--epithelial--CAV1--epithelial	ICAM1	epithelial	CAV1	epithelial	1	0	1	1	9.09091	0	10	4.34783	0.434783
4292	ICAM1--epithelial--CAV1--myeloid	ICAM1	epithelial	CAV1	myeloid	1	0	1	1	9.09091	0	10	4.34783	0.434783
4293	ICAM1--epithelial--EGFR--endothelial	ICAM1	epithelial	EGFR	endothelial	1	0	1	1	9.09091	0	10	4.34783	0.434783
4294	ICAM1--epithelial--EGFR--myeloid	ICAM1	epithelial	EGFR	myeloid	1	0	1	1	9.09091	0	10	4.34783	0.434783
4302	SEMA4A--epithelial--LILRB2--endothelial	SEMA4A	epithelial	LILRB2	endothelial	3	0	1	1	27.2727	0	10	4.34783	0.434783
4334	TNC--epithelial--EGFR--epithelial	TNC	epithelial	EGFR	epithelial	1	0	1	1	9.09091	0	10	4.34783	0.434783
4348	WNT5A--epithelial--MCAM--lymphocyte	WNT5A	epithelial	MCAM	lymphocyte	1	0	1	1	9.09091	0	10	4.34783	0.434783
4358	THBS1--stromal--ITGA6--myeloid	THBS1	stromal	ITGA6	myeloid	3	0	1	1	27.2727	0	10	4.34783	0.434783
4362	HSPG2--stromal--FGFR1--epithelial	HSPG2	stromal	FGFR1	epithelial	2	0	1	1	18.1818	0	10	4.34783	0.434783
4421	DCN--endothelial--TLR4--endothelial	DCN	endothelial	TLR4	endothelial	0	0	1	1	0	0	10	4.34783	0.434783
4425	IL15--endothelial--IL2RA--endothelial	IL15	endothelial	IL2RA	endothelial	1	0	1	1	9.09091	0	10	4.34783	0.434783
4426	CD59--epithelial--STAB1--lymphocyte	CD59	epithelial	STAB1	lymphocyte	0	0	1	1	0	0	10	4.34783	0.434783
4437	THBS1--epithelial--ITGA6--lymphocyte	THBS1	epithelial	ITGA6	lymphocyte	0	0	1	1	0	0	10	4.34783	0.434783
4440	PLAU--endothelial--ITGA5--stromal	PLAU	endothelial	ITGA5	stromal	2	0	1	1	18.1818	0	10	4.34783	0.434783
4441	MMP7--myeloid--CD44--stromal	MMP7	myeloid	CD44	stromal	0	0	1	1	0	0	10	4.34783	0.434783
4449	CD14--endothelial--ITGA4--myeloid	CD14	endothelial	ITGA4	myeloid	1	0	1	1	9.09091	0	10	4.34783	0.434783
4456	HBEGF--endothelial--CD44--endothelial	HBEGF	endothelial	CD44	endothelial	1	0	1	1	9.09091	0	10	4.34783	0.434783
4461	LRPAP1--epithelial--LDLR--endothelial	LRPAP1	epithelial	LDLR	endothelial	1	0	1	1	9.09091	0	10	4.34783	0.434783
4479	ANGPTL4--myeloid--SDC4--endothelial	ANGPTL4	myeloid	SDC4	endothelial	1	0	1	1	9.09091	0	10	4.34783	0.434783
4484	TFPI--myeloid--SDC4--endothelial	TFPI	myeloid	SDC4	endothelial	1	0	1	1	9.09091	0	10	4.34783	0.434783
4497	IGF1--myeloid--ITGA6--endothelial	IGF1	myeloid	ITGA6	endothelial	1	0	1	1	9.09091	0	10	4.34783	0.434783
4499	EREG--epithelial--ERBB3--endothelial	EREG	epithelial	ERBB3	endothelial	1	0	1	1	9.09091	0	10	4.34783	0.434783
4501	LAMA4--epithelial--ITGA6--endothelial	LAMA4	epithelial	ITGA6	endothelial	1	0	1	1	9.09091	0	10	4.34783	0.434783
4502	LAMA4--lymphocyte--ITGA6--endothelial	LAMA4	lymphocyte	ITGA6	endothelial	1	0	1	1	9.09091	0	10	4.34783	0.434783
4503	LAMA4--myeloid--ITGA6--endothelial	LAMA4	myeloid	ITGA6	endothelial	1	0	1	1	9.09091	0	10	4.34783	0.434783
4504	LAMB1--epithelial--ITGA6--endothelial	LAMB1	epithelial	ITGA6	endothelial	1	0	1	1	9.09091	0	10	4.34783	0.434783
4505	LAMB1--myeloid--ITGA6--endothelial	LAMB1	myeloid	ITGA6	endothelial	1	0	1	1	9.09091	0	10	4.34783	0.434783
4525	ANGPTL4--epithelial--CDH5--stromal	ANGPTL4	epithelial	CDH5	stromal	1	0	1	1	9.09091	0	10	4.34783	0.434783
4528	IL1B--stromal--IL1R1--epithelial	IL1B	stromal	IL1R1	epithelial	1	0	1	1	9.09091	0	10	4.34783	0.434783
4533	IL6--epithelial--HRH1--stromal	IL6	epithelial	HRH1	stromal	1	0	1	1	9.09091	0	10	4.34783	0.434783
4534	CCL2--epithelial--ACKR1--lymphocyte	CCL2	epithelial	ACKR1	lymphocyte	0	0	1	1	0	0	10	4.34783	0.434783
4535	IL6--epithelial--F3--lymphocyte	IL6	epithelial	F3	lymphocyte	0	0	1	1	0	0	10	4.34783	0.434783
4536	RARRES1--epithelial--NRP2--stromal	RARRES1	epithelial	NRP2	stromal	0	0	1	1	0	0	10	4.34783	0.434783
4538	IL6--epithelial--F3--myeloid	IL6	epithelial	F3	myeloid	0	0	1	1	0	0	10	4.34783	0.434783
4539	CCL2--epithelial--ACKR1--stromal	CCL2	epithelial	ACKR1	stromal	0	0	1	1	0	0	10	4.34783	0.434783
4540	CCL2--epithelial--ACKR1--myeloid	CCL2	epithelial	ACKR1	myeloid	0	0	1	1	0	0	10	4.34783	0.434783
4541	IL6--epithelial--F3--endothelial	IL6	epithelial	F3	endothelial	0	0	1	1	0	0	10	4.34783	0.434783
4542	EREG--epithelial--ERBB3--myeloid	EREG	epithelial	ERBB3	myeloid	0	0	1	1	0	0	10	4.34783	0.434783
4543	CCL2--epithelial--ACKR1--epithelial	CCL2	epithelial	ACKR1	epithelial	0	0	1	1	0	0	10	4.34783	0.434783
4545	TNC--epithelial--SDC4--endothelial	TNC	epithelial	SDC4	endothelial	0	0	1	1	0	0	10	4.34783	0.434783
4547	CEACAM1--lymphocyte--EGFR--epithelial	CEACAM1	lymphocyte	EGFR	epithelial	1	0	1	1	9.09091	0	10	4.34783	0.434783
4548	ICAM1--myeloid--IL2RA--endothelial	ICAM1	myeloid	IL2RA	endothelial	1	0	1	1	9.09091	0	10	4.34783	0.434783
4549	IGF1--endothelial--IGF1R--endothelial	IGF1	endothelial	IGF1R	endothelial	0	0	1	1	0	0	10	4.34783	0.434783
4550	GZMA--endothelial--F2R--lymphocyte	GZMA	endothelial	F2R	lymphocyte	0	0	1	1	0	0	10	4.34783	0.434783
4551	TIMP1--endothelial--FGFR2--endothelial	TIMP1	endothelial	FGFR2	endothelial	0	0	1	1	0	0	10	4.34783	0.434783
4552	HBEGF--stromal--CD44--epithelial	HBEGF	stromal	CD44	epithelial	0	0	1	1	0	0	10	4.34783	0.434783
4553	EREG--epithelial--ERBB3--stromal	EREG	epithelial	ERBB3	stromal	0	0	1	1	0	0	10	4.34783	0.434783
4554	TFPI--epithelial--F3--epithelial	TFPI	epithelial	F3	epithelial	0	0	1	1	0	0	10	4.34783	0.434783
4555	IL11--myeloid--IL6R--endothelial	IL11	myeloid	IL6R	endothelial	0	0	1	1	0	0	10	4.34783	0.434783
4557	ANGPTL4--epithelial--SDC4--myeloid	ANGPTL4	epithelial	SDC4	myeloid	0	0	1	1	0	0	10	4.34783	0.434783
4559	EFEMP1--endothelial--EGFR--epithelial	EFEMP1	endothelial	EGFR	epithelial	0	0	1	1	0	0	10	4.34783	0.434783
4560	VEGFA--endothelial--NRP1--endothelial	VEGFA	endothelial	NRP1	endothelial	1	0	1	1	9.09091	0	10	4.34783	0.434783
4561	ANGPTL4--epithelial--CDH11--endothelial	ANGPTL4	epithelial	CDH11	endothelial	0	0	1	1	0	0	10	4.34783	0.434783
4562	HSPA8--lymphocyte--LDLR--lymphocyte	HSPA8	lymphocyte	LDLR	lymphocyte	0	0	1	1	0	0	10	4.34783	0.434783
4563	HBEGF--stromal--PRLR--myeloid	HBEGF	stromal	PRLR	myeloid	0	0	1	1	0	0	10	4.34783	0.434783
4565	EFEMP1--lymphocyte--EGFR--epithelial	EFEMP1	lymphocyte	EGFR	epithelial	0	0	1	1	0	0	10	4.34783	0.434783
4568	THBS1--lymphocyte--CD47--lymphocyte	THBS1	lymphocyte	CD47	lymphocyte	0	0	1	1	0	0	10	4.34783	0.434783
4569	CDH1--lymphocyte--ERBB3--myeloid	CDH1	lymphocyte	ERBB3	myeloid	0	0	1	1	0	0	10	4.34783	0.434783
4570	ANGPTL4--epithelial--SDC4--lymphocyte	ANGPTL4	epithelial	SDC4	lymphocyte	0	0	1	1	0	0	10	4.34783	0.434783
4571	CD38--epithelial--PECAM1--myeloid	CD38	epithelial	PECAM1	myeloid	1	0	1	1	9.09091	0	10	4.34783	0.434783
4572	PTN--lymphocyte--PTPRB--epithelial	PTN	lymphocyte	PTPRB	epithelial	0	0	1	1	0	0	10	4.34783	0.434783
4573	IGF1--endothelial--ITGB4--stromal	IGF1	endothelial	ITGB4	stromal	0	0	1	1	0	0	10	4.34783	0.434783
4574	IGF1--endothelial--ITGB4--lymphocyte	IGF1	endothelial	ITGB4	lymphocyte	0	0	1	1	0	0	10	4.34783	0.434783
4575	IGF1--endothelial--ITGB4--myeloid	IGF1	endothelial	ITGB4	myeloid	0	0	1	1	0	0	10	4.34783	0.434783
4577	TFPI--myeloid--SDC4--myeloid	TFPI	myeloid	SDC4	myeloid	1	0	1	1	9.09091	0	10	4.34783	0.434783
4578	IL1B--lymphocyte--IL1R2--epithelial	IL1B	lymphocyte	IL1R2	epithelial	0	0	1	1	0	0	10	4.34783	0.434783
4579	ANGPTL4--epithelial--CDH11--lymphocyte	ANGPTL4	epithelial	CDH11	lymphocyte	0	0	1	1	0	0	10	4.34783	0.434783
4580	NRG1--myeloid--EGFR--epithelial	NRG1	myeloid	EGFR	epithelial	1	0	1	1	9.09091	0	10	4.34783	0.434783
4581	ANXA1--lymphocyte--EGFR--epithelial	ANXA1	lymphocyte	EGFR	epithelial	0	0	1	1	0	0	10	4.34783	0.434783
4591	TNFSF10--lymphocyte--TNFRSF11B--epithelial	TNFSF10	lymphocyte	TNFRSF11B	epithelial	1	0	1	1	9.09091	0	10	4.34783	0.434783
4600	VEGFA--lymphocyte--CD44--myeloid	VEGFA	lymphocyte	CD44	myeloid	1	0	1	1	9.09091	0	10	4.34783	0.434783
4602	ICAM1--myeloid--MUC1--myeloid	ICAM1	myeloid	MUC1	myeloid	2	0	1	1	18.1818	0	10	4.34783	0.434783
4637	ANGPTL4--endothelial--CDH5--lymphocyte	ANGPTL4	endothelial	CDH5	lymphocyte	0	0	1	1	0	0	10	4.34783	0.434783
4638	RPS19--epithelial--C5AR1--endothelial	RPS19	epithelial	C5AR1	endothelial	0	0	1	1	0	0	10	4.34783	0.434783
4639	SEMA5A--epithelial--MET--lymphocyte	SEMA5A	epithelial	MET	lymphocyte	1	0	1	1	9.09091	0	10	4.34783	0.434783
4640	SPP1--myeloid--S1PR1--stromal	SPP1	myeloid	S1PR1	stromal	1	0	1	1	9.09091	0	10	4.34783	0.434783
4641	RPS19--epithelial--C5AR1--lymphocyte	RPS19	epithelial	C5AR1	lymphocyte	0	0	1	1	0	0	10	4.34783	0.434783
4642	SEMA5A--epithelial--MET--myeloid	SEMA5A	epithelial	MET	myeloid	0	0	1	1	0	0	10	4.34783	0.434783
4643	WNT5A--endothelial--MCAM--lymphocyte	WNT5A	endothelial	MCAM	lymphocyte	0	0	1	1	0	0	10	4.34783	0.434783
4644	WNT5A--lymphocyte--MCAM--lymphocyte	WNT5A	lymphocyte	MCAM	lymphocyte	0	0	1	1	0	0	10	4.34783	0.434783
4645	CD14--endothelial--TLR4--epithelial	CD14	endothelial	TLR4	epithelial	0	0	1	1	0	0	10	4.34783	0.434783
4646	CD14--lymphocyte--TLR4--epithelial	CD14	lymphocyte	TLR4	epithelial	0	0	1	1	0	0	10	4.34783	0.434783
4647	CD14--epithelial--TLR4--stromal	CD14	epithelial	TLR4	stromal	0	0	1	1	0	0	10	4.34783	0.434783
4648	EREG--endothelial--ERBB3--stromal	EREG	endothelial	ERBB3	stromal	0	0	1	1	0	0	10	4.34783	0.434783
4649	CD14--epithelial--ITGA4--stromal	CD14	epithelial	ITGA4	stromal	0	0	1	1	0	0	10	4.34783	0.434783
4692	TIMP1--endothelial--FGFR2--myeloid	TIMP1	endothelial	FGFR2	myeloid	0	0	1	1	0	0	10	4.34783	0.434783
4693	HDC--epithelial--HRH1--stromal	HDC	epithelial	HRH1	stromal	0	0	1	1	0	0	10	4.34783	0.434783
4694	GZMA--myeloid--F2R--endothelial	GZMA	myeloid	F2R	endothelial	0	0	1	1	0	0	10	4.34783	0.434783
4695	CSF1--lymphocyte--CSF3R--lymphocyte	CSF1	lymphocyte	CSF3R	lymphocyte	0	0	1	1	0	0	10	4.34783	0.434783
4696	CSF3--lymphocyte--CSF3R--lymphocyte	CSF3	lymphocyte	CSF3R	lymphocyte	0	0	1	1	0	0	10	4.34783	0.434783
4697	COL4A4--epithelial--CD47--myeloid	COL4A4	epithelial	CD47	myeloid	0	0	1	1	0	0	10	4.34783	0.434783
4698	CSF3--stromal--CSF3R--lymphocyte	CSF3	stromal	CSF3R	lymphocyte	0	0	1	1	0	0	10	4.34783	0.434783
4699	HSPA1A--epithelial--TLR4--stromal	HSPA1A	epithelial	TLR4	stromal	0	0	1	1	0	0	10	4.34783	0.434783
4700	IL1B--endothelial--IL1R1--epithelial	IL1B	endothelial	IL1R1	epithelial	0	0	1	1	0	0	10	4.34783	0.434783
4701	PSAP--epithelial--AR--epithelial	PSAP	epithelial	AR	epithelial	0	0	1	1	0	0	10	4.34783	0.434783
4702	PLTP--lymphocyte--ABCA1--epithelial	PLTP	lymphocyte	ABCA1	epithelial	0	0	1	1	0	0	10	4.34783	0.434783
4703	VWF--lymphocyte--TNFRSF11B--epithelial	VWF	lymphocyte	TNFRSF11B	epithelial	0	0	1	1	0	0	10	4.34783	0.434783
4704	TNF--myeloid--TRPM2--lymphocyte	TNF	myeloid	TRPM2	lymphocyte	0	0	1	1	0	0	10	4.34783	0.434783
4705	CD59--lymphocyte--STAB1--endothelial	CD59	lymphocyte	STAB1	endothelial	0	0	1	1	0	0	10	4.34783	0.434783
4706	TNFSF10--stromal--TNFRSF11B--epithelial	TNFSF10	stromal	TNFRSF11B	epithelial	0	0	1	1	0	0	10	4.34783	0.434783
4707	VWF--epithelial--TNFRSF11B--epithelial	VWF	epithelial	TNFRSF11B	epithelial	0	0	1	1	0	0	10	4.34783	0.434783
4708	TNF--stromal--TRPM2--lymphocyte	TNF	stromal	TRPM2	lymphocyte	0	0	1	1	0	0	10	4.34783	0.434783
117	DCN--epithelial--TLR2--myeloid	DCN	epithelial	TLR2	myeloid	11	13	9	22	100	100	90	95.6522	0.434783
227	EREG--myeloid--ERBB3--epithelial	EREG	myeloid	ERBB3	epithelial	11	13	9	22	100	100	90	95.6522	0.434783
276	ICAM1--stromal--MUC1--epithelial	ICAM1	stromal	MUC1	epithelial	11	13	9	22	100	100	90	95.6522	0.434783
282	HGF--myeloid--MET--epithelial	HGF	myeloid	MET	epithelial	11	13	9	22	100	100	90	95.6522	0.434783
330	FN1--myeloid--C5AR1--myeloid	FN1	myeloid	C5AR1	myeloid	11	13	9	22	100	100	90	95.6522	0.434783
357	LAMB3--epithelial--CD44--lymphocyte	LAMB3	epithelial	CD44	lymphocyte	11	13	9	22	100	100	90	95.6522	0.434783
370	FN1--epithelial--C5AR1--myeloid	FN1	epithelial	C5AR1	myeloid	10	13	9	22	90.9091	100	90	95.6522	0.434783
420	HGF--lymphocyte--MET--epithelial	HGF	lymphocyte	MET	epithelial	11	13	9	22	100	100	90	95.6522	0.434783
467	DCN--epithelial--MET--epithelial	DCN	epithelial	MET	epithelial	11	13	9	22	100	100	90	95.6522	0.434783
526	S100A4--lymphocyte--ERBB3--epithelial	S100A4	lymphocyte	ERBB3	epithelial	10	13	9	22	90.9091	100	90	95.6522	0.434783
541	FGF9--lymphocyte--FGFR2--epithelial	FGF9	lymphocyte	FGFR2	epithelial	11	13	9	22	100	100	90	95.6522	0.434783
550	IL15--stromal--IL2RA--myeloid	IL15	stromal	IL2RA	myeloid	10	13	9	22	90.9091	100	90	95.6522	0.434783
560	FBN1--stromal--ITGB6--epithelial	FBN1	stromal	ITGB6	epithelial	11	13	9	22	100	100	90	95.6522	0.434783
561	CEACAM1--lymphocyte--HAVCR2--myeloid	CEACAM1	lymphocyte	HAVCR2	myeloid	11	13	9	22	100	100	90	95.6522	0.434783
577	PRG4--lymphocyte--TLR4--myeloid	PRG4	lymphocyte	TLR4	myeloid	11	13	9	22	100	100	90	95.6522	0.434783
616	B2M--myeloid--TFRC--myeloid	B2M	myeloid	TFRC	myeloid	11	13	9	22	100	100	90	95.6522	0.434783
661	CD14--epithelial--TLR4--myeloid	CD14	epithelial	TLR4	myeloid	9	13	9	22	81.8182	100	90	95.6522	0.434783
698	S100A8--lymphocyte--CD69--lymphocyte	S100A8	lymphocyte	CD69	lymphocyte	11	13	9	22	100	100	90	95.6522	0.434783
786	ICAM1--myeloid--IL2RA--myeloid	ICAM1	myeloid	IL2RA	myeloid	10	13	9	22	90.9091	100	90	95.6522	0.434783
800	ADAM23--epithelial--ITGA4--lymphocyte	ADAM23	epithelial	ITGA4	lymphocyte	11	13	9	22	100	100	90	95.6522	0.434783
805	S100A8--myeloid--CD69--lymphocyte	S100A8	myeloid	CD69	lymphocyte	11	13	9	22	100	100	90	95.6522	0.434783
834	VWF--myeloid--ITGA4--lymphocyte	VWF	myeloid	ITGA4	lymphocyte	11	13	9	22	100	100	90	95.6522	0.434783
862	CD14--lymphocyte--ITGA4--lymphocyte	CD14	lymphocyte	ITGA4	lymphocyte	11	13	9	22	100	100	90	95.6522	0.434783
870	CD14--epithelial--ITGA4--lymphocyte	CD14	epithelial	ITGA4	lymphocyte	11	13	9	22	100	100	90	95.6522	0.434783
908	LAMA4--stromal--CD44--myeloid	LAMA4	stromal	CD44	myeloid	11	13	9	22	100	100	90	95.6522	0.434783
913	COL1A1--stromal--CD44--lymphocyte	COL1A1	stromal	CD44	lymphocyte	11	13	9	22	100	100	90	95.6522	0.434783
1024	B2M--lymphocyte--KLRC2--epithelial	B2M	lymphocyte	KLRC2	epithelial	11	13	9	22	100	100	90	95.6522	0.434783
1045	VEGFA--myeloid--CD44--myeloid	VEGFA	myeloid	CD44	myeloid	10	13	9	22	90.9091	100	90	95.6522	0.434783
1085	MXRA5--lymphocyte--CD69--lymphocyte	MXRA5	lymphocyte	CD69	lymphocyte	10	13	9	22	90.9091	100	90	95.6522	0.434783
1154	SPON2--lymphocyte--ITGA4--lymphocyte	SPON2	lymphocyte	ITGA4	lymphocyte	11	13	9	22	100	100	90	95.6522	0.434783
1157	VCAN--stromal--CD44--stromal	VCAN	stromal	CD44	stromal	11	13	9	22	100	100	90	95.6522	0.434783
1183	VCAN--stromal--CD44--lymphocyte	VCAN	stromal	CD44	lymphocyte	11	13	9	22	100	100	90	95.6522	0.434783
1197	COL4A2--stromal--CD44--stromal	COL4A2	stromal	CD44	stromal	11	13	9	22	100	100	90	95.6522	0.434783
1234	COL4A2--stromal--CD44--lymphocyte	COL4A2	stromal	CD44	lymphocyte	11	13	9	22	100	100	90	95.6522	0.434783
1264	COL1A2--stromal--CD44--lymphocyte	COL1A2	stromal	CD44	lymphocyte	11	13	9	22	100	100	90	95.6522	0.434783
1331	THBS2--stromal--CD47--lymphocyte	THBS2	stromal	CD47	lymphocyte	11	13	9	22	100	100	90	95.6522	0.434783
1333	CEACAM1--stromal--EGFR--stromal	CEACAM1	stromal	EGFR	stromal	11	13	9	22	100	100	90	95.6522	0.434783
1406	COL4A1--stromal--CD47--lymphocyte	COL4A1	stromal	CD47	lymphocyte	10	13	9	22	90.9091	100	90	95.6522	0.434783
1436	HLA-A--lymphocyte--LILRB1--lymphocyte	HLA-A	lymphocyte	LILRB1	lymphocyte	10	13	9	22	90.9091	100	90	95.6522	0.434783
1461	COL4A1--stromal--CD44--stromal	COL4A1	stromal	CD44	stromal	10	13	9	22	90.9091	100	90	95.6522	0.434783
1484	S100A4--lymphocyte--EGFR--stromal	S100A4	lymphocyte	EGFR	stromal	10	13	9	22	90.9091	100	90	95.6522	0.434783
1491	ADAM23--lymphocyte--ITGA5--stromal	ADAM23	lymphocyte	ITGA5	stromal	10	13	9	22	90.9091	100	90	95.6522	0.434783
1564	LAMB1--stromal--CD44--stromal	LAMB1	stromal	CD44	stromal	10	13	9	22	90.9091	100	90	95.6522	0.434783
1592	LAMB1--stromal--CD44--lymphocyte	LAMB1	stromal	CD44	lymphocyte	10	13	9	22	90.9091	100	90	95.6522	0.434783
1606	LGI4--stromal--ADAM23--lymphocyte	LGI4	stromal	ADAM23	lymphocyte	10	13	9	22	90.9091	100	90	95.6522	0.434783
1674	PLA2G2A--stromal--EGFR--stromal	PLA2G2A	stromal	EGFR	stromal	11	13	9	22	100	100	90	95.6522	0.434783
1822	DCN--stromal--TLR4--stromal	DCN	stromal	TLR4	stromal	9	13	9	22	81.8182	100	90	95.6522	0.434783
1985	TNFSF10--stromal--CCR6--lymphocyte	TNFSF10	stromal	CCR6	lymphocyte	10	13	9	22	90.9091	100	90	95.6522	0.434783
2103	DEFB1--myeloid--CCR6--lymphocyte	DEFB1	myeloid	CCR6	lymphocyte	11	13	9	22	100	100	90	95.6522	0.434783
2201	FN1--stromal--CD44--lymphocyte	FN1	stromal	CD44	lymphocyte	11	13	9	22	100	100	90	95.6522	0.434783
2339	COMP--stromal--CD47--lymphocyte	COMP	stromal	CD47	lymphocyte	10	13	9	22	90.9091	100	90	95.6522	0.434783
2352	FN1--stromal--ITGA2--stromal	FN1	stromal	ITGA2	stromal	10	13	9	22	90.9091	100	90	95.6522	0.434783
2457	PLA2G2A--stromal--ITGA5--stromal	PLA2G2A	stromal	ITGA5	stromal	11	13	9	22	100	100	90	95.6522	0.434783
2461	FGF7--stromal--NRP1--stromal	FGF7	stromal	NRP1	stromal	11	13	9	22	100	100	90	95.6522	0.434783
667	ACE--epithelial--BDKRB2--myeloid	ACE	epithelial	BDKRB2	myeloid	0	2	0	2	0	15.3846	0	8.69565	0.486166
1289	ADM--lymphocyte--RAMP1--stromal	ADM	lymphocyte	RAMP1	stromal	2	2	0	2	18.1818	15.3846	0	8.69565	0.486166
1522	RARRES1--endothelial--NRP2--endothelial	RARRES1	endothelial	NRP2	endothelial	1	2	0	2	9.09091	15.3846	0	8.69565	0.486166
1531	LRPAP1--stromal--LDLR--myeloid	LRPAP1	stromal	LDLR	myeloid	0	2	0	2	0	15.3846	0	8.69565	0.486166
1621	SPON2--stromal--ITGA4--endothelial	SPON2	stromal	ITGA4	endothelial	0	2	0	2	0	15.3846	0	8.69565	0.486166
1696	ADM--lymphocyte--ACKR3--epithelial	ADM	lymphocyte	ACKR3	epithelial	1	2	0	2	9.09091	15.3846	0	8.69565	0.486166
1714	SPARC--endothelial--FGFR1--epithelial	SPARC	endothelial	FGFR1	epithelial	3	2	0	2	27.2727	15.3846	0	8.69565	0.486166
1721	EDN1--myeloid--EDNRA--stromal	EDN1	myeloid	EDNRA	stromal	4	2	0	2	36.3636	15.3846	0	8.69565	0.486166
1750	IL15--stromal--IL2RA--epithelial	IL15	stromal	IL2RA	epithelial	1	2	0	2	9.09091	15.3846	0	8.69565	0.486166
1752	CCN1--endothelial--CAV1--stromal	CCN1	endothelial	CAV1	stromal	3	2	0	2	27.2727	15.3846	0	8.69565	0.486166
1781	SPON2--stromal--ITGA4--epithelial	SPON2	stromal	ITGA4	epithelial	1	2	0	2	9.09091	15.3846	0	8.69565	0.486166
1786	WNT5A--stromal--FZD4--lymphocyte	WNT5A	stromal	FZD4	lymphocyte	2	2	0	2	18.1818	15.3846	0	8.69565	0.486166
1793	IGF1--stromal--ITGA6--myeloid	IGF1	stromal	ITGA6	myeloid	2	2	0	2	18.1818	15.3846	0	8.69565	0.486166
1805	EFNB2--stromal--EPHA3--myeloid	EFNB2	stromal	EPHA3	myeloid	1	2	0	2	9.09091	15.3846	0	8.69565	0.486166
1814	EFNB2--stromal--EPHA3--lymphocyte	EFNB2	stromal	EPHA3	lymphocyte	1	2	0	2	9.09091	15.3846	0	8.69565	0.486166
1910	WNT5A--stromal--EPHA7--myeloid	WNT5A	stromal	EPHA7	myeloid	3	2	0	2	27.2727	15.3846	0	8.69565	0.486166
1938	WNT5A--stromal--LDLR--myeloid	WNT5A	stromal	LDLR	myeloid	1	2	0	2	9.09091	15.3846	0	8.69565	0.486166
1950	LRPAP1--stromal--LDLR--lymphocyte	LRPAP1	stromal	LDLR	lymphocyte	1	2	0	2	9.09091	15.3846	0	8.69565	0.486166
1971	SORBS1--endothelial--INSR--stromal	SORBS1	endothelial	INSR	stromal	1	2	0	2	9.09091	15.3846	0	8.69565	0.486166
1982	TNC--endothelial--EGFR--stromal	TNC	endothelial	EGFR	stromal	3	2	0	2	27.2727	15.3846	0	8.69565	0.486166
2032	GREM1--myeloid--KDR--stromal	GREM1	myeloid	KDR	stromal	0	2	0	2	0	15.3846	0	8.69565	0.486166
2044	LGI4--myeloid--ADAM22--endothelial	LGI4	myeloid	ADAM22	endothelial	0	2	0	2	0	15.3846	0	8.69565	0.486166
2072	LGI4--endothelial--ADAM22--endothelial	LGI4	endothelial	ADAM22	endothelial	0	2	0	2	0	15.3846	0	8.69565	0.486166
2078	CCN2--lymphocyte--EGFR--stromal	CCN2	lymphocyte	EGFR	stromal	2	2	0	2	18.1818	15.3846	0	8.69565	0.486166
2080	SORBS1--myeloid--ITGA1--endothelial	SORBS1	myeloid	ITGA1	endothelial	2	2	0	2	18.1818	15.3846	0	8.69565	0.486166
2132	PLA2G2A--endothelial--EGFR--stromal	PLA2G2A	endothelial	EGFR	stromal	0	2	0	2	0	15.3846	0	8.69565	0.486166
2144	LAMA4--stromal--ITGA6--myeloid	LAMA4	stromal	ITGA6	myeloid	1	2	0	2	9.09091	15.3846	0	8.69565	0.486166
2173	MYL9--endothelial--CD69--myeloid	MYL9	endothelial	CD69	myeloid	0	2	0	2	0	15.3846	0	8.69565	0.486166
2178	PTGS2--endothelial--CAV1--stromal	PTGS2	endothelial	CAV1	stromal	4	2	0	2	36.3636	15.3846	0	8.69565	0.486166
2184	S100A8--myeloid--CD36--epithelial	S100A8	myeloid	CD36	epithelial	0	2	0	2	0	15.3846	0	8.69565	0.486166
2212	CCN1--endothelial--ITGA5--myeloid	CCN1	endothelial	ITGA5	myeloid	2	2	0	2	18.1818	15.3846	0	8.69565	0.486166
2241	CCN1--endothelial--ITGA5--stromal	CCN1	endothelial	ITGA5	stromal	3	2	0	2	27.2727	15.3846	0	8.69565	0.486166
2244	PLA2G2A--lymphocyte--ITGA4--myeloid	PLA2G2A	lymphocyte	ITGA4	myeloid	1	2	0	2	9.09091	15.3846	0	8.69565	0.486166
2285	WNT5A--stromal--LDLR--lymphocyte	WNT5A	stromal	LDLR	lymphocyte	1	2	0	2	9.09091	15.3846	0	8.69565	0.486166
2297	COL4A4--epithelial--CD44--stromal	COL4A4	epithelial	CD44	stromal	1	2	0	2	9.09091	15.3846	0	8.69565	0.486166
2303	SPP1--stromal--CD44--stromal	SPP1	stromal	CD44	stromal	0	2	0	2	0	15.3846	0	8.69565	0.486166
2307	LPL--lymphocyte--CD44--stromal	LPL	lymphocyte	CD44	stromal	0	2	0	2	0	15.3846	0	8.69565	0.486166
2310	CCN2--myeloid--EGFR--stromal	CCN2	myeloid	EGFR	stromal	1	2	0	2	9.09091	15.3846	0	8.69565	0.486166
2315	VCAN--myeloid--EGFR--stromal	VCAN	myeloid	EGFR	stromal	3	2	0	2	27.2727	15.3846	0	8.69565	0.486166
2340	CCN2--endothelial--ITGA5--myeloid	CCN2	endothelial	ITGA5	myeloid	0	2	0	2	0	15.3846	0	8.69565	0.486166
2361	SELE--epithelial--CD44--stromal	SELE	epithelial	CD44	stromal	0	2	0	2	0	15.3846	0	8.69565	0.486166
2364	HAS2--epithelial--CD44--stromal	HAS2	epithelial	CD44	stromal	0	2	0	2	0	15.3846	0	8.69565	0.486166
2385	FGF18--stromal--FGFR1--epithelial	FGF18	stromal	FGFR1	epithelial	3	2	0	2	27.2727	15.3846	0	8.69565	0.486166
2393	SORBS1--epithelial--ITGA1--endothelial	SORBS1	epithelial	ITGA1	endothelial	4	2	0	2	36.3636	15.3846	0	8.69565	0.486166
2398	LAMB1--stromal--ITGA6--myeloid	LAMB1	stromal	ITGA6	myeloid	3	2	0	2	27.2727	15.3846	0	8.69565	0.486166
2405	IL33--stromal--IL1RL1--lymphocyte	IL33	stromal	IL1RL1	lymphocyte	0	2	0	2	0	15.3846	0	8.69565	0.486166
2422	NLGN4X--stromal--NRXN1--myeloid	NLGN4X	stromal	NRXN1	myeloid	2	2	0	2	18.1818	15.3846	0	8.69565	0.486166
2428	PRG4--epithelial--TLR4--stromal	PRG4	epithelial	TLR4	stromal	0	2	0	2	0	15.3846	0	8.69565	0.486166
2438	APOD--endothelial--LEPR--endothelial	APOD	endothelial	LEPR	endothelial	0	2	0	2	0	15.3846	0	8.69565	0.486166
2479	PLA2G2A--lymphocyte--ITGA5--stromal	PLA2G2A	lymphocyte	ITGA5	stromal	0	2	0	2	0	15.3846	0	8.69565	0.486166
2500	IL33--endothelial--IL1RL1--stromal	IL33	endothelial	IL1RL1	stromal	4	2	0	2	36.3636	15.3846	0	8.69565	0.486166
2502	IL33--endothelial--IL1RAP--epithelial	IL33	endothelial	IL1RAP	epithelial	2	2	0	2	18.1818	15.3846	0	8.69565	0.486166
2584	WNT5A--epithelial--MCAM--stromal	WNT5A	epithelial	MCAM	stromal	2	2	0	2	18.1818	15.3846	0	8.69565	0.486166
2676	VIM--myeloid--CD44--lymphocyte	VIM	myeloid	CD44	lymphocyte	2	2	0	2	18.1818	15.3846	0	8.69565	0.486166
2693	C3--stromal--ITGAX--endothelial	C3	stromal	ITGAX	endothelial	1	2	0	2	9.09091	15.3846	0	8.69565	0.486166
2694	FGF2--epithelial--CD44--lymphocyte	FGF2	epithelial	CD44	lymphocyte	2	2	0	2	18.1818	15.3846	0	8.69565	0.486166
2728	COL4A4--endothelial--CD44--lymphocyte	COL4A4	endothelial	CD44	lymphocyte	1	2	0	2	9.09091	15.3846	0	8.69565	0.486166
2970	IGLC1--lymphocyte--FCGR2B--endothelial	IGLC1	lymphocyte	FCGR2B	endothelial	0	2	0	2	0	15.3846	0	8.69565	0.486166
2989	VEGFA--epithelial--GRIN2B--endothelial	VEGFA	epithelial	GRIN2B	endothelial	0	2	0	2	0	15.3846	0	8.69565	0.486166
3012	FN1--stromal--C5AR1--endothelial	FN1	stromal	C5AR1	endothelial	0	2	0	2	0	15.3846	0	8.69565	0.486166
3015	DCN--stromal--TLR2--endothelial	DCN	stromal	TLR2	endothelial	2	2	0	2	18.1818	15.3846	0	8.69565	0.486166
3034	IL15--lymphocyte--IL2RA--lymphocyte	IL15	lymphocyte	IL2RA	lymphocyte	0	2	0	2	0	15.3846	0	8.69565	0.486166
3052	SLIT3--stromal--ROBO4--myeloid	SLIT3	stromal	ROBO4	myeloid	1	2	0	2	9.09091	15.3846	0	8.69565	0.486166
3059	CXCL12--myeloid--SDC4--endothelial	CXCL12	myeloid	SDC4	endothelial	0	2	0	2	0	15.3846	0	8.69565	0.486166
3070	CP--stromal--SLC40A1--stromal	CP	stromal	SLC40A1	stromal	0	2	0	2	0	15.3846	0	8.69565	0.486166
3090	FN1--endothelial--CD44--lymphocyte	FN1	endothelial	CD44	lymphocyte	1	2	0	2	9.09091	15.3846	0	8.69565	0.486166
3105	NCAM1--endothelial--GFRA1--stromal	NCAM1	endothelial	GFRA1	stromal	1	2	0	2	9.09091	15.3846	0	8.69565	0.486166
3116	COL4A1--endothelial--CD44--endothelial	COL4A1	endothelial	CD44	endothelial	1	2	0	2	9.09091	15.3846	0	8.69565	0.486166
3128	RARRES1--lymphocyte--NRP2--myeloid	RARRES1	lymphocyte	NRP2	myeloid	1	2	0	2	9.09091	15.3846	0	8.69565	0.486166
3159	VCAN--stromal--TLR2--endothelial	VCAN	stromal	TLR2	endothelial	4	2	0	2	36.3636	15.3846	0	8.69565	0.486166
3181	MYL9--stromal--CD69--endothelial	MYL9	stromal	CD69	endothelial	0	2	0	2	0	15.3846	0	8.69565	0.486166
3199	RARRES1--myeloid--NRP2--myeloid	RARRES1	myeloid	NRP2	myeloid	0	2	0	2	0	15.3846	0	8.69565	0.486166
3201	CCN1--stromal--TLR2--endothelial	CCN1	stromal	TLR2	endothelial	3	2	0	2	27.2727	15.3846	0	8.69565	0.486166
3224	TFPI--stromal--F3--lymphocyte	TFPI	stromal	F3	lymphocyte	1	2	0	2	9.09091	15.3846	0	8.69565	0.486166
3241	TNC--stromal--ITGA7--myeloid	TNC	stromal	ITGA7	myeloid	2	2	0	2	18.1818	15.3846	0	8.69565	0.486166
3244	VWF--lymphocyte--SCARA5--stromal	VWF	lymphocyte	SCARA5	stromal	0	2	0	2	0	15.3846	0	8.69565	0.486166
3271	CP--stromal--SLC40A1--epithelial	CP	stromal	SLC40A1	epithelial	0	2	0	2	0	15.3846	0	8.69565	0.486166
3281	PSAP--lymphocyte--AR--stromal	PSAP	lymphocyte	AR	stromal	1	2	0	2	9.09091	15.3846	0	8.69565	0.486166
3282	EDN1--stromal--EDNRB--myeloid	EDN1	stromal	EDNRB	myeloid	0	2	0	2	0	15.3846	0	8.69565	0.486166
3298	B2M--myeloid--KLRD1--epithelial	B2M	myeloid	KLRD1	epithelial	1	2	0	2	9.09091	15.3846	0	8.69565	0.486166
3308	ANGPTL4--stromal--CDH5--stromal	ANGPTL4	stromal	CDH5	stromal	1	2	0	2	9.09091	15.3846	0	8.69565	0.486166
3318	HGF--myeloid--NRP1--stromal	HGF	myeloid	NRP1	stromal	2	2	0	2	18.1818	15.3846	0	8.69565	0.486166
3323	TNC--epithelial--ITGA2--stromal	TNC	epithelial	ITGA2	stromal	1	2	0	2	9.09091	15.3846	0	8.69565	0.486166
3334	TIMP2--endothelial--CD44--myeloid	TIMP2	endothelial	CD44	myeloid	2	2	0	2	18.1818	15.3846	0	8.69565	0.486166
3338	S100A8--lymphocyte--CD69--endothelial	S100A8	lymphocyte	CD69	endothelial	0	2	0	2	0	15.3846	0	8.69565	0.486166
3358	SORBS1--lymphocyte--ITGA1--stromal	SORBS1	lymphocyte	ITGA1	stromal	0	2	0	2	0	15.3846	0	8.69565	0.486166
3361	FGF18--stromal--FGFR1--endothelial	FGF18	stromal	FGFR1	endothelial	1	2	0	2	9.09091	15.3846	0	8.69565	0.486166
3362	IL33--stromal--IL1RL1--stromal	IL33	stromal	IL1RL1	stromal	0	2	0	2	0	15.3846	0	8.69565	0.486166
3372	CXCL12--lymphocyte--ITGA5--stromal	CXCL12	lymphocyte	ITGA5	stromal	1	2	0	2	9.09091	15.3846	0	8.69565	0.486166
3380	CXCL12--stromal--ACKR3--lymphocyte	CXCL12	stromal	ACKR3	lymphocyte	2	2	0	2	18.1818	15.3846	0	8.69565	0.486166
3383	TNC--epithelial--PTPRZ1--stromal	TNC	epithelial	PTPRZ1	stromal	2	2	0	2	18.1818	15.3846	0	8.69565	0.486166
3407	ACE--stromal--BDKRB2--epithelial	ACE	stromal	BDKRB2	epithelial	0	2	0	2	0	15.3846	0	8.69565	0.486166
3424	VEGFA--epithelial--GRIN2B--stromal	VEGFA	epithelial	GRIN2B	stromal	0	2	0	2	0	15.3846	0	8.69565	0.486166
3454	LAMC3--epithelial--CD44--stromal	LAMC3	epithelial	CD44	stromal	0	2	0	2	0	15.3846	0	8.69565	0.486166
3482	CCN1--epithelial--CAV1--stromal	CCN1	epithelial	CAV1	stromal	0	2	0	2	0	15.3846	0	8.69565	0.486166
3485	COL1A1--epithelial--DDR2--stromal	COL1A1	epithelial	DDR2	stromal	0	2	0	2	0	15.3846	0	8.69565	0.486166
3492	VEGFA--epithelial--CD44--stromal	VEGFA	epithelial	CD44	stromal	0	2	0	2	0	15.3846	0	8.69565	0.486166
3520	TNC--epithelial--PTPRZ1--epithelial	TNC	epithelial	PTPRZ1	epithelial	0	2	0	2	0	15.3846	0	8.69565	0.486166
3533	EFNB2--epithelial--PECAM1--myeloid	EFNB2	epithelial	PECAM1	myeloid	2	2	0	2	18.1818	15.3846	0	8.69565	0.486166
3545	IL1B--myeloid--IL1R1--myeloid	IL1B	myeloid	IL1R1	myeloid	4	2	0	2	36.3636	15.3846	0	8.69565	0.486166
3546	ADM--endothelial--RAMP1--myeloid	ADM	endothelial	RAMP1	myeloid	1	2	0	2	9.09091	15.3846	0	8.69565	0.486166
3563	IGF1--myeloid--ITGB4--endothelial	IGF1	myeloid	ITGB4	endothelial	2	2	0	2	18.1818	15.3846	0	8.69565	0.486166
3569	ADM--endothelial--ACKR3--lymphocyte	ADM	endothelial	ACKR3	lymphocyte	1	2	0	2	9.09091	15.3846	0	8.69565	0.486166
3577	ADM--endothelial--RAMP1--lymphocyte	ADM	endothelial	RAMP1	lymphocyte	1	2	0	2	9.09091	15.3846	0	8.69565	0.486166
3584	ADM--endothelial--CALCRL--lymphocyte	ADM	endothelial	CALCRL	lymphocyte	1	2	0	2	9.09091	15.3846	0	8.69565	0.486166
3586	ALCAM--lymphocyte--NRP1--stromal	ALCAM	lymphocyte	NRP1	stromal	1	2	0	2	9.09091	15.3846	0	8.69565	0.486166
3605	ECM1--stromal--ITGB4--myeloid	ECM1	stromal	ITGB4	myeloid	2	2	0	2	18.1818	15.3846	0	8.69565	0.486166
3609	ECM1--stromal--ITGB4--lymphocyte	ECM1	stromal	ITGB4	lymphocyte	2	2	0	2	18.1818	15.3846	0	8.69565	0.486166
3619	NID1--stromal--ITGA3--lymphocyte	NID1	stromal	ITGA3	lymphocyte	3	2	0	2	27.2727	15.3846	0	8.69565	0.486166
3871	ICAM1--stromal--EGFR--epithelial	ICAM1	stromal	EGFR	epithelial	1	2	0	2	9.09091	15.3846	0	8.69565	0.486166
3898	TNC--endothelial--ITGA2--endothelial	TNC	endothelial	ITGA2	endothelial	1	2	0	2	9.09091	15.3846	0	8.69565	0.486166
3907	FN1--epithelial--ITGA2--endothelial	FN1	epithelial	ITGA2	endothelial	1	2	0	2	9.09091	15.3846	0	8.69565	0.486166
3913	HSPG2--myeloid--ITGA2--endothelial	HSPG2	myeloid	ITGA2	endothelial	2	2	0	2	18.1818	15.3846	0	8.69565	0.486166
3922	HSPG2--lymphocyte--ITGA2--endothelial	HSPG2	lymphocyte	ITGA2	endothelial	1	2	0	2	9.09091	15.3846	0	8.69565	0.486166
3964	CXCL12--endothelial--AVPR1A--endothelial	CXCL12	endothelial	AVPR1A	endothelial	5	2	0	2	45.4545	15.3846	0	8.69565	0.486166
3970	FGF18--epithelial--FGFR1--myeloid	FGF18	epithelial	FGFR1	myeloid	1	2	0	2	9.09091	15.3846	0	8.69565	0.486166
3971	CXCL12--endothelial--SDC4--myeloid	CXCL12	endothelial	SDC4	myeloid	4	2	0	2	36.3636	15.3846	0	8.69565	0.486166
3983	PTN--lymphocyte--PTPRZ1--endothelial	PTN	lymphocyte	PTPRZ1	endothelial	0	2	0	2	0	15.3846	0	8.69565	0.486166
4003	LAMB1--stromal--ITGA6--stromal	LAMB1	stromal	ITGA6	stromal	1	2	0	2	9.09091	15.3846	0	8.69565	0.486166
4005	WNT7A--lymphocyte--LDLR--stromal	WNT7A	lymphocyte	LDLR	stromal	2	2	0	2	18.1818	15.3846	0	8.69565	0.486166
4020	MDK--myeloid--PTPRZ1--endothelial	MDK	myeloid	PTPRZ1	endothelial	1	2	0	2	9.09091	15.3846	0	8.69565	0.486166
4026	LAMB3--endothelial--ITGA6--endothelial	LAMB3	endothelial	ITGA6	endothelial	1	2	0	2	9.09091	15.3846	0	8.69565	0.486166
4027	IL11--stromal--IL6R--stromal	IL11	stromal	IL6R	stromal	1	2	0	2	9.09091	15.3846	0	8.69565	0.486166
4094	ICAM1--endothelial--MUC1--stromal	ICAM1	endothelial	MUC1	stromal	2	2	0	2	18.1818	15.3846	0	8.69565	0.486166
4095	ICAM1--endothelial--MUC1--lymphocyte	ICAM1	endothelial	MUC1	lymphocyte	1	2	0	2	9.09091	15.3846	0	8.69565	0.486166
4100	ICAM1--endothelial--CAV1--lymphocyte	ICAM1	endothelial	CAV1	lymphocyte	1	2	0	2	9.09091	15.3846	0	8.69565	0.486166
4104	FN1--myeloid--ITGA2--endothelial	FN1	myeloid	ITGA2	endothelial	1	2	0	2	9.09091	15.3846	0	8.69565	0.486166
4111	CCL8--stromal--ACKR1--lymphocyte	CCL8	stromal	ACKR1	lymphocyte	1	2	0	2	9.09091	15.3846	0	8.69565	0.486166
4174	FN1--epithelial--ITGA2--epithelial	FN1	epithelial	ITGA2	epithelial	3	2	0	2	27.2727	15.3846	0	8.69565	0.486166
4199	RPS19--endothelial--C5AR1--epithelial	RPS19	endothelial	C5AR1	epithelial	1	2	0	2	9.09091	15.3846	0	8.69565	0.486166
4206	HLA-A--epithelial--CD3G--myeloid	HLA-A	epithelial	CD3G	myeloid	0	2	0	2	0	15.3846	0	8.69565	0.486166
4208	HLA-A--epithelial--CD3G--stromal	HLA-A	epithelial	CD3G	stromal	0	2	0	2	0	15.3846	0	8.69565	0.486166
4211	CXCL12--endothelial--ITGA4--endothelial	CXCL12	endothelial	ITGA4	endothelial	0	2	0	2	0	15.3846	0	8.69565	0.486166
4221	LAMA4--endothelial--ITGA6--stromal	LAMA4	endothelial	ITGA6	stromal	0	2	0	2	0	15.3846	0	8.69565	0.486166
4251	LGALS1--endothelial--CD69--myeloid	LGALS1	endothelial	CD69	myeloid	1	2	0	2	9.09091	15.3846	0	8.69565	0.486166
65	CCL14--endothelial--ACKR1--endothelial	CCL14	endothelial	ACKR1	endothelial	11	11	10	21	100	84.6154	100	91.3043	0.486166
132	F13A1--myeloid--ITGA4--endothelial	F13A1	myeloid	ITGA4	endothelial	10	11	10	21	90.9091	84.6154	100	91.3043	0.486166
255	NRG1--endothelial--HLA-DPB1--myeloid	NRG1	endothelial	HLA-DPB1	myeloid	11	11	10	21	100	84.6154	100	91.3043	0.486166
265	LILRB4--stromal--LAIR1--myeloid	LILRB4	stromal	LAIR1	myeloid	10	11	10	21	90.9091	84.6154	100	91.3043	0.486166
290	LILRB4--lymphocyte--LAIR1--myeloid	LILRB4	lymphocyte	LAIR1	myeloid	10	11	10	21	90.9091	84.6154	100	91.3043	0.486166
318	COL4A1--endothelial--CD47--epithelial	COL4A1	endothelial	CD47	epithelial	9	11	10	21	81.8182	84.6154	100	91.3043	0.486166
329	CXCL8--myeloid--ACKR1--endothelial	CXCL8	myeloid	ACKR1	endothelial	11	11	10	21	100	84.6154	100	91.3043	0.486166
342	CCL8--endothelial--ACKR1--endothelial	CCL8	endothelial	ACKR1	endothelial	11	11	10	21	100	84.6154	100	91.3043	0.486166
351	CXCL2--myeloid--ACKR1--endothelial	CXCL2	myeloid	ACKR1	endothelial	11	11	10	21	100	84.6154	100	91.3043	0.486166
354	CCL8--stromal--ACKR1--endothelial	CCL8	stromal	ACKR1	endothelial	11	11	10	21	100	84.6154	100	91.3043	0.486166
356	CCL8--myeloid--ACKR1--endothelial	CCL8	myeloid	ACKR1	endothelial	11	11	10	21	100	84.6154	100	91.3043	0.486166
358	CCL2--myeloid--ACKR1--endothelial	CCL2	myeloid	ACKR1	endothelial	11	11	10	21	100	84.6154	100	91.3043	0.486166
367	B2M--myeloid--CD247--lymphocyte	B2M	myeloid	CD247	lymphocyte	9	11	10	21	81.8182	84.6154	100	91.3043	0.486166
374	CXCL1--stromal--ACKR1--endothelial	CXCL1	stromal	ACKR1	endothelial	11	11	10	21	100	84.6154	100	91.3043	0.486166
375	CCL14--myeloid--ACKR1--endothelial	CCL14	myeloid	ACKR1	endothelial	11	11	10	21	100	84.6154	100	91.3043	0.486166
379	SEMA3G--endothelial--FCGR2A--myeloid	SEMA3G	endothelial	FCGR2A	myeloid	10	11	10	21	90.9091	84.6154	100	91.3043	0.486166
384	PDGFB--endothelial--S1PR1--stromal	PDGFB	endothelial	S1PR1	stromal	10	11	10	21	90.9091	84.6154	100	91.3043	0.486166
386	CEACAM1--epithelial--HAVCR2--myeloid	CEACAM1	epithelial	HAVCR2	myeloid	11	11	10	21	100	84.6154	100	91.3043	0.486166
387	CCL2--epithelial--ACKR1--endothelial	CCL2	epithelial	ACKR1	endothelial	11	11	10	21	100	84.6154	100	91.3043	0.486166
391	CCL14--lymphocyte--ACKR1--endothelial	CCL14	lymphocyte	ACKR1	endothelial	11	11	10	21	100	84.6154	100	91.3043	0.486166
392	CCL11--stromal--ACKR1--endothelial	CCL11	stromal	ACKR1	endothelial	11	11	10	21	100	84.6154	100	91.3043	0.486166
397	CCL14--epithelial--ACKR1--endothelial	CCL14	epithelial	ACKR1	endothelial	11	11	10	21	100	84.6154	100	91.3043	0.486166
401	CXCL1--lymphocyte--ACKR1--endothelial	CXCL1	lymphocyte	ACKR1	endothelial	11	11	10	21	100	84.6154	100	91.3043	0.486166
402	CXCL3--stromal--ACKR1--endothelial	CXCL3	stromal	ACKR1	endothelial	11	11	10	21	100	84.6154	100	91.3043	0.486166
404	CXCL8--lymphocyte--ACKR1--endothelial	CXCL8	lymphocyte	ACKR1	endothelial	11	11	10	21	100	84.6154	100	91.3043	0.486166
407	CCL14--stromal--ACKR1--endothelial	CCL14	stromal	ACKR1	endothelial	11	11	10	21	100	84.6154	100	91.3043	0.486166
416	CCL2--stromal--ACKR1--endothelial	CCL2	stromal	ACKR1	endothelial	11	11	10	21	100	84.6154	100	91.3043	0.486166
417	CXCL1--myeloid--ACKR1--endothelial	CXCL1	myeloid	ACKR1	endothelial	11	11	10	21	100	84.6154	100	91.3043	0.486166
419	CCL8--lymphocyte--ACKR1--endothelial	CCL8	lymphocyte	ACKR1	endothelial	11	11	10	21	100	84.6154	100	91.3043	0.486166
421	CCL8--epithelial--ACKR1--endothelial	CCL8	epithelial	ACKR1	endothelial	11	11	10	21	100	84.6154	100	91.3043	0.486166
426	CXCL8--stromal--ACKR1--endothelial	CXCL8	stromal	ACKR1	endothelial	11	11	10	21	100	84.6154	100	91.3043	0.486166
427	CCL11--epithelial--ACKR1--endothelial	CCL11	epithelial	ACKR1	endothelial	11	11	10	21	100	84.6154	100	91.3043	0.486166
428	CXCL3--endothelial--ACKR1--endothelial	CXCL3	endothelial	ACKR1	endothelial	11	11	10	21	100	84.6154	100	91.3043	0.486166
429	CCL11--endothelial--ACKR1--endothelial	CCL11	endothelial	ACKR1	endothelial	11	11	10	21	100	84.6154	100	91.3043	0.486166
430	CCL11--lymphocyte--ACKR1--endothelial	CCL11	lymphocyte	ACKR1	endothelial	11	11	10	21	100	84.6154	100	91.3043	0.486166
431	CXCL3--lymphocyte--ACKR1--endothelial	CXCL3	lymphocyte	ACKR1	endothelial	11	11	10	21	100	84.6154	100	91.3043	0.486166
432	CCL11--myeloid--ACKR1--endothelial	CCL11	myeloid	ACKR1	endothelial	11	11	10	21	100	84.6154	100	91.3043	0.486166
448	CXCL1--endothelial--ACKR1--endothelial	CXCL1	endothelial	ACKR1	endothelial	11	11	10	21	100	84.6154	100	91.3043	0.486166
469	CCL2--lymphocyte--ACKR1--endothelial	CCL2	lymphocyte	ACKR1	endothelial	11	11	10	21	100	84.6154	100	91.3043	0.486166
473	CXCL2--stromal--ACKR1--endothelial	CXCL2	stromal	ACKR1	endothelial	11	11	10	21	100	84.6154	100	91.3043	0.486166
479	CCL5--stromal--ACKR1--endothelial	CCL5	stromal	ACKR1	endothelial	11	11	10	21	100	84.6154	100	91.3043	0.486166
480	CXCL2--lymphocyte--ACKR1--endothelial	CXCL2	lymphocyte	ACKR1	endothelial	11	11	10	21	100	84.6154	100	91.3043	0.486166
481	CCL5--myeloid--ACKR1--endothelial	CCL5	myeloid	ACKR1	endothelial	11	11	10	21	100	84.6154	100	91.3043	0.486166
506	CCL5--lymphocyte--SDC4--epithelial	CCL5	lymphocyte	SDC4	epithelial	10	11	10	21	90.9091	84.6154	100	91.3043	0.486166
516	HSPG2--endothelial--FGFR1--epithelial	HSPG2	endothelial	FGFR1	epithelial	11	11	10	21	100	84.6154	100	91.3043	0.486166
528	CEACAM1--endothelial--HAVCR2--myeloid	CEACAM1	endothelial	HAVCR2	myeloid	11	11	10	21	100	84.6154	100	91.3043	0.486166
549	TNF--endothelial--TNFRSF1B--myeloid	TNF	endothelial	TNFRSF1B	myeloid	10	11	10	21	90.9091	84.6154	100	91.3043	0.486166
572	CDH1--epithelial--KLRG1--endothelial	CDH1	epithelial	KLRG1	endothelial	9	11	10	21	81.8182	84.6154	100	91.3043	0.486166
617	COL4A2--epithelial--CD93--myeloid	COL4A2	epithelial	CD93	myeloid	9	11	10	21	81.8182	84.6154	100	91.3043	0.486166
624	CSF1--endothelial--CSF3R--myeloid	CSF1	endothelial	CSF3R	myeloid	11	11	10	21	100	84.6154	100	91.3043	0.486166
636	COL4A4--stromal--CD47--epithelial	COL4A4	stromal	CD47	epithelial	9	11	10	21	81.8182	84.6154	100	91.3043	0.486166
644	THBS2--stromal--ITGA6--endothelial	THBS2	stromal	ITGA6	endothelial	11	11	10	21	100	84.6154	100	91.3043	0.486166
650	FGF18--lymphocyte--FGFR2--epithelial	FGF18	lymphocyte	FGFR2	epithelial	9	11	10	21	81.8182	84.6154	100	91.3043	0.486166
730	COMP--stromal--CD47--epithelial	COMP	stromal	CD47	epithelial	9	11	10	21	81.8182	84.6154	100	91.3043	0.486166
736	IGF1--stromal--INSR--stromal	IGF1	stromal	INSR	stromal	11	11	10	21	100	84.6154	100	91.3043	0.486166
825	AREG--myeloid--ERBB3--myeloid	AREG	myeloid	ERBB3	myeloid	10	11	10	21	90.9091	84.6154	100	91.3043	0.486166
920	CD14--myeloid--ITGA4--epithelial	CD14	myeloid	ITGA4	epithelial	9	11	10	21	81.8182	84.6154	100	91.3043	0.486166
932	AREG--myeloid--ERBB3--lymphocyte	AREG	myeloid	ERBB3	lymphocyte	11	11	10	21	100	84.6154	100	91.3043	0.486166
956	THBS2--stromal--ITGA4--myeloid	THBS2	stromal	ITGA4	myeloid	11	11	10	21	100	84.6154	100	91.3043	0.486166
959	NRG1--myeloid--MS4A4A--myeloid	NRG1	myeloid	MS4A4A	myeloid	11	11	10	21	100	84.6154	100	91.3043	0.486166
1026	S100A8--epithelial--CD36--endothelial	S100A8	epithelial	CD36	endothelial	10	11	10	21	90.9091	84.6154	100	91.3043	0.486166
1043	CDH1--epithelial--EGFR--lymphocyte	CDH1	epithelial	EGFR	lymphocyte	9	11	10	21	81.8182	84.6154	100	91.3043	0.486166
1150	APOE--stromal--LDLR--epithelial	APOE	stromal	LDLR	epithelial	10	11	10	21	90.9091	84.6154	100	91.3043	0.486166
1341	ALCAM--stromal--CD6--lymphocyte	ALCAM	stromal	CD6	lymphocyte	11	11	10	21	100	84.6154	100	91.3043	0.486166
1424	LGALS1--epithelial--CD69--lymphocyte	LGALS1	epithelial	CD69	lymphocyte	10	11	10	21	90.9091	84.6154	100	91.3043	0.486166
1452	CXCL14--stromal--CXCR4--myeloid	CXCL14	stromal	CXCR4	myeloid	11	11	10	21	100	84.6154	100	91.3043	0.486166
1541	APOE--myeloid--LDLR--epithelial	APOE	myeloid	LDLR	epithelial	9	11	10	21	81.8182	84.6154	100	91.3043	0.486166
1969	TNF--stromal--FLT4--endothelial	TNF	stromal	FLT4	endothelial	7	11	10	21	63.6364	84.6154	100	91.3043	0.486166
2308	HSPA8--lymphocyte--LDLR--epithelial	HSPA8	lymphocyte	LDLR	epithelial	10	11	10	21	90.9091	84.6154	100	91.3043	0.486166
2452	HSPA8--stromal--LDLR--epithelial	HSPA8	stromal	LDLR	epithelial	9	11	10	21	81.8182	84.6154	100	91.3043	0.486166
2503	B2M--lymphocyte--KLRC1--epithelial	B2M	lymphocyte	KLRC1	epithelial	10	11	10	21	90.9091	84.6154	100	91.3043	0.486166
2505	B2M--lymphocyte--KLRC1--myeloid	B2M	lymphocyte	KLRC1	myeloid	11	11	10	21	100	84.6154	100	91.3043	0.486166
2614	LILRB4--myeloid--LAIR1--lymphocyte	LILRB4	myeloid	LAIR1	lymphocyte	9	11	10	21	81.8182	84.6154	100	91.3043	0.486166
1472	EFEMP1--endothelial--EGFR--stromal	EFEMP1	endothelial	EGFR	stromal	5	1	2	3	45.4545	7.69231	20	13.0435	0.559571
1686	IGF1--stromal--ITGB4--lymphocyte	IGF1	stromal	ITGB4	lymphocyte	4	1	2	3	36.3636	7.69231	20	13.0435	0.559571
1898	ADM--myeloid--ACKR3--lymphocyte	ADM	myeloid	ACKR3	lymphocyte	2	1	2	3	18.1818	7.69231	20	13.0435	0.559571
2504	LAMB3--myeloid--ITGB4--epithelial	LAMB3	myeloid	ITGB4	epithelial	1	1	2	3	9.09091	7.69231	20	13.0435	0.559571
2516	WNT5A--myeloid--FZD4--endothelial	WNT5A	myeloid	FZD4	endothelial	2	1	2	3	18.1818	7.69231	20	13.0435	0.559571
2523	IGF1--endothelial--ITGB4--epithelial	IGF1	endothelial	ITGB4	epithelial	1	1	2	3	9.09091	7.69231	20	13.0435	0.559571
2527	LAMC2--myeloid--ITGB4--epithelial	LAMC2	myeloid	ITGB4	epithelial	1	1	2	3	9.09091	7.69231	20	13.0435	0.559571
2532	IGF1--epithelial--ITGB4--epithelial	IGF1	epithelial	ITGB4	epithelial	1	1	2	3	9.09091	7.69231	20	13.0435	0.559571
2536	LAMC3--endothelial--ITGB4--epithelial	LAMC3	endothelial	ITGB4	epithelial	1	1	2	3	9.09091	7.69231	20	13.0435	0.559571
2539	LAMC2--endothelial--ITGB4--epithelial	LAMC2	endothelial	ITGB4	epithelial	1	1	2	3	9.09091	7.69231	20	13.0435	0.559571
2541	LAMB3--stromal--ITGB4--epithelial	LAMB3	stromal	ITGB4	epithelial	1	1	2	3	9.09091	7.69231	20	13.0435	0.559571
2543	LAMB1--epithelial--ITGB4--epithelial	LAMB1	epithelial	ITGB4	epithelial	1	1	2	3	9.09091	7.69231	20	13.0435	0.559571
2560	LAMB3--lymphocyte--ITGB4--epithelial	LAMB3	lymphocyte	ITGB4	epithelial	1	1	2	3	9.09091	7.69231	20	13.0435	0.559571
2568	IGF1--lymphocyte--ITGB4--epithelial	IGF1	lymphocyte	ITGB4	epithelial	1	1	2	3	9.09091	7.69231	20	13.0435	0.559571
2569	LAMA3--myeloid--ITGB4--epithelial	LAMA3	myeloid	ITGB4	epithelial	1	1	2	3	9.09091	7.69231	20	13.0435	0.559571
2574	IGF1--myeloid--ITGB4--epithelial	IGF1	myeloid	ITGB4	epithelial	1	1	2	3	9.09091	7.69231	20	13.0435	0.559571
2628	SORBS1--stromal--INSR--epithelial	SORBS1	stromal	INSR	epithelial	1	1	2	3	9.09091	7.69231	20	13.0435	0.559571
2637	HGF--lymphocyte--MET--endothelial	HGF	lymphocyte	MET	endothelial	3	1	2	3	27.2727	7.69231	20	13.0435	0.559571
2692	PLTP--stromal--ABCA1--epithelial	PLTP	stromal	ABCA1	epithelial	4	1	2	3	36.3636	7.69231	20	13.0435	0.559571
2704	LAMC3--endothelial--CD44--lymphocyte	LAMC3	endothelial	CD44	lymphocyte	2	1	2	3	18.1818	7.69231	20	13.0435	0.559571
2708	HGF--epithelial--CD44--lymphocyte	HGF	epithelial	CD44	lymphocyte	1	1	2	3	9.09091	7.69231	20	13.0435	0.559571
2709	PRG4--endothelial--CD44--lymphocyte	PRG4	endothelial	CD44	lymphocyte	1	1	2	3	9.09091	7.69231	20	13.0435	0.559571
2713	LAMB3--stromal--CD44--lymphocyte	LAMB3	stromal	CD44	lymphocyte	4	1	2	3	36.3636	7.69231	20	13.0435	0.559571
2718	LAMC3--myeloid--CD44--lymphocyte	LAMC3	myeloid	CD44	lymphocyte	3	1	2	3	27.2727	7.69231	20	13.0435	0.559571
2734	NRG1--lymphocyte--HLA-DPB1--lymphocyte	NRG1	lymphocyte	HLA-DPB1	lymphocyte	2	1	2	3	18.1818	7.69231	20	13.0435	0.559571
2738	TNF--lymphocyte--TNFRSF1B--stromal	TNF	lymphocyte	TNFRSF1B	stromal	3	1	2	3	27.2727	7.69231	20	13.0435	0.559571
2743	HBEGF--lymphocyte--CD44--lymphocyte	HBEGF	lymphocyte	CD44	lymphocyte	1	1	2	3	9.09091	7.69231	20	13.0435	0.559571
2788	COL14A1--endothelial--CD44--myeloid	COL14A1	endothelial	CD44	myeloid	3	1	2	3	27.2727	7.69231	20	13.0435	0.559571
2835	VCAN--epithelial--CD44--myeloid	VCAN	epithelial	CD44	myeloid	2	1	2	3	18.1818	7.69231	20	13.0435	0.559571
2860	FGF7--stromal--FGFR1--myeloid	FGF7	stromal	FGFR1	myeloid	3	1	2	3	27.2727	7.69231	20	13.0435	0.559571
2862	SPARC--epithelial--FGFR1--stromal	SPARC	epithelial	FGFR1	stromal	0	1	2	3	0	7.69231	20	13.0435	0.559571
2874	THBS1--stromal--ITGA4--stromal	THBS1	stromal	ITGA4	stromal	0	1	2	3	0	7.69231	20	13.0435	0.559571
2880	HGF--stromal--NRP1--epithelial	HGF	stromal	NRP1	epithelial	2	1	2	3	18.1818	7.69231	20	13.0435	0.559571
2923	NAMPT--stromal--INSR--epithelial	NAMPT	stromal	INSR	epithelial	0	1	2	3	0	7.69231	20	13.0435	0.559571
2943	IGF1--epithelial--IGF1R--epithelial	IGF1	epithelial	IGF1R	epithelial	0	1	2	3	0	7.69231	20	13.0435	0.559571
2953	APOD--epithelial--LEPR--stromal	APOD	epithelial	LEPR	stromal	1	1	2	3	9.09091	7.69231	20	13.0435	0.559571
2954	APOD--lymphocyte--LEPR--stromal	APOD	lymphocyte	LEPR	stromal	3	1	2	3	27.2727	7.69231	20	13.0435	0.559571
2955	SORBS1--epithelial--ITGA1--stromal	SORBS1	epithelial	ITGA1	stromal	1	1	2	3	9.09091	7.69231	20	13.0435	0.559571
3027	LAMB1--myeloid--ITGB4--epithelial	LAMB1	myeloid	ITGB4	epithelial	0	1	2	3	0	7.69231	20	13.0435	0.559571
3047	NLGN4X--lymphocyte--NRXN1--stromal	NLGN4X	lymphocyte	NRXN1	stromal	1	1	2	3	9.09091	7.69231	20	13.0435	0.559571
3106	F13A1--lymphocyte--ITGA4--myeloid	F13A1	lymphocyte	ITGA4	myeloid	1	1	2	3	9.09091	7.69231	20	13.0435	0.559571
3110	WNT5A--myeloid--EPHA7--stromal	WNT5A	myeloid	EPHA7	stromal	0	1	2	3	0	7.69231	20	13.0435	0.559571
3117	IL15--endothelial--IL2RA--epithelial	IL15	endothelial	IL2RA	epithelial	3	1	2	3	27.2727	7.69231	20	13.0435	0.559571
3118	IL15--endothelial--IL2RA--stromal	IL15	endothelial	IL2RA	stromal	3	1	2	3	27.2727	7.69231	20	13.0435	0.559571
3223	WNT5A--lymphocyte--FZD4--stromal	WNT5A	lymphocyte	FZD4	stromal	0	1	2	3	0	7.69231	20	13.0435	0.559571
3278	CD55--endothelial--ADGRE2--stromal	CD55	endothelial	ADGRE2	stromal	1	1	2	3	9.09091	7.69231	20	13.0435	0.559571
3290	TNC--lymphocyte--ITGA7--stromal	TNC	lymphocyte	ITGA7	stromal	0	1	2	3	0	7.69231	20	13.0435	0.559571
3297	MMP7--endothelial--CD44--lymphocyte	MMP7	endothelial	CD44	lymphocyte	1	1	2	3	9.09091	7.69231	20	13.0435	0.559571
3413	TIMP3--myeloid--CD44--myeloid	TIMP3	myeloid	CD44	myeloid	3	1	2	3	27.2727	7.69231	20	13.0435	0.559571
3444	VIM--lymphocyte--CD44--myeloid	VIM	lymphocyte	CD44	myeloid	0	1	2	3	0	7.69231	20	13.0435	0.559571
3513	CEACAM1--epithelial--HAVCR2--stromal	CEACAM1	epithelial	HAVCR2	stromal	1	1	2	3	9.09091	7.69231	20	13.0435	0.559571
3524	CEACAM1--epithelial--HAVCR2--epithelial	CEACAM1	epithelial	HAVCR2	epithelial	1	1	2	3	9.09091	7.69231	20	13.0435	0.559571
3526	CEACAM1--epithelial--HAVCR2--endothelial	CEACAM1	epithelial	HAVCR2	endothelial	1	1	2	3	9.09091	7.69231	20	13.0435	0.559571
3543	LAMA4--epithelial--ITGB4--endothelial	LAMA4	epithelial	ITGB4	endothelial	4	1	2	3	36.3636	7.69231	20	13.0435	0.559571
3549	IGF1--endothelial--ITGB4--endothelial	IGF1	endothelial	ITGB4	endothelial	3	1	2	3	27.2727	7.69231	20	13.0435	0.559571
3551	LAMC3--myeloid--ITGB4--endothelial	LAMC3	myeloid	ITGB4	endothelial	5	1	2	3	45.4545	7.69231	20	13.0435	0.559571
3591	LAMC2--lymphocyte--ITGB4--epithelial	LAMC2	lymphocyte	ITGB4	epithelial	0	1	2	3	0	7.69231	20	13.0435	0.559571
3627	B2M--myeloid--LILRB1--endothelial	B2M	myeloid	LILRB1	endothelial	2	1	2	3	18.1818	7.69231	20	13.0435	0.559571
3630	HLA-A--myeloid--LILRB1--endothelial	HLA-A	myeloid	LILRB1	endothelial	0	1	2	3	0	7.69231	20	13.0435	0.559571
3655	VEGFA--myeloid--EGFR--lymphocyte	VEGFA	myeloid	EGFR	lymphocyte	3	1	2	3	27.2727	7.69231	20	13.0435	0.559571
3691	FGF2--stromal--SDC4--lymphocyte	FGF2	stromal	SDC4	lymphocyte	1	1	2	3	9.09091	7.69231	20	13.0435	0.559571
3694	TGM2--stromal--SDC4--stromal	TGM2	stromal	SDC4	stromal	3	1	2	3	27.2727	7.69231	20	13.0435	0.559571
3709	CSF3--endothelial--CSF1R--endothelial	CSF3	endothelial	CSF1R	endothelial	0	1	2	3	0	7.69231	20	13.0435	0.559571
3739	CCL20--myeloid--CCR6--myeloid	CCL20	myeloid	CCR6	myeloid	1	1	2	3	9.09091	7.69231	20	13.0435	0.559571
3831	VWF--myeloid--TNFRSF11B--endothelial	VWF	myeloid	TNFRSF11B	endothelial	0	1	2	3	0	7.69231	20	13.0435	0.559571
3849	VIM--epithelial--CD44--stromal	VIM	epithelial	CD44	stromal	1	1	2	3	9.09091	7.69231	20	13.0435	0.559571
3862	HLA-A--myeloid--LILRB1--epithelial	HLA-A	myeloid	LILRB1	epithelial	1	1	2	3	9.09091	7.69231	20	13.0435	0.559571
3912	CD14--epithelial--TLR4--endothelial	CD14	epithelial	TLR4	endothelial	1	1	2	3	9.09091	7.69231	20	13.0435	0.559571
3957	IL15--epithelial--IL2RA--endothelial	IL15	epithelial	IL2RA	endothelial	0	1	2	3	0	7.69231	20	13.0435	0.559571
3968	ECM1--endothelial--ITGB4--endothelial	ECM1	endothelial	ITGB4	endothelial	4	1	2	3	36.3636	7.69231	20	13.0435	0.559571
3972	BMP2--epithelial--RGMB--lymphocyte	BMP2	epithelial	RGMB	lymphocyte	1	1	2	3	9.09091	7.69231	20	13.0435	0.559571
4000	LAMC3--lymphocyte--ITGA6--endothelial	LAMC3	lymphocyte	ITGA6	endothelial	1	1	2	3	9.09091	7.69231	20	13.0435	0.559571
4006	LAMC3--myeloid--ITGA6--endothelial	LAMC3	myeloid	ITGA6	endothelial	1	1	2	3	9.09091	7.69231	20	13.0435	0.559571
4008	LAMA3--myeloid--ITGA6--endothelial	LAMA3	myeloid	ITGA6	endothelial	1	1	2	3	9.09091	7.69231	20	13.0435	0.559571
4087	HBEGF--endothelial--CD44--epithelial	HBEGF	endothelial	CD44	epithelial	2	1	2	3	18.1818	7.69231	20	13.0435	0.559571
4093	THBS1--endothelial--ITGA6--endothelial	THBS1	endothelial	ITGA6	endothelial	4	1	2	3	36.3636	7.69231	20	13.0435	0.559571
4103	CDH1--myeloid--IGF1R--stromal	CDH1	myeloid	IGF1R	stromal	5	1	2	3	45.4545	7.69231	20	13.0435	0.559571
4112	LAMB3--lymphocyte--CD44--lymphocyte	LAMB3	lymphocyte	CD44	lymphocyte	1	1	2	3	9.09091	7.69231	20	13.0435	0.559571
4138	HSPG2--lymphocyte--ITGA2--epithelial	HSPG2	lymphocyte	ITGA2	epithelial	1	1	2	3	9.09091	7.69231	20	13.0435	0.559571
4159	CSF3--epithelial--CSF1R--endothelial	CSF3	epithelial	CSF1R	endothelial	1	1	2	3	9.09091	7.69231	20	13.0435	0.559571
4184	C3--endothelial--NRP1--endothelial	C3	endothelial	NRP1	endothelial	2	1	2	3	18.1818	7.69231	20	13.0435	0.559571
4203	TIMP1--endothelial--FGFR2--stromal	TIMP1	endothelial	FGFR2	stromal	0	1	2	3	0	7.69231	20	13.0435	0.559571
4222	LAMA4--endothelial--ITGB4--lymphocyte	LAMA4	endothelial	ITGB4	lymphocyte	1	1	2	3	9.09091	7.69231	20	13.0435	0.559571
4273	SELE--stromal--CEACAM1--lymphocyte	SELE	stromal	CEACAM1	lymphocyte	2	1	2	3	18.1818	7.69231	20	13.0435	0.559571
4429	B2M--myeloid--LILRB2--lymphocyte	B2M	myeloid	LILRB2	lymphocyte	3	1	2	3	27.2727	7.69231	20	13.0435	0.559571
4430	B2M--myeloid--LILRB2--stromal	B2M	myeloid	LILRB2	stromal	3	1	2	3	27.2727	7.69231	20	13.0435	0.559571
4431	B2M--myeloid--LILRB2--epithelial	B2M	myeloid	LILRB2	epithelial	2	1	2	3	18.1818	7.69231	20	13.0435	0.559571
4432	B2M--myeloid--KLRC2--stromal	B2M	myeloid	KLRC2	stromal	3	1	2	3	27.2727	7.69231	20	13.0435	0.559571
4433	B2M--myeloid--LILRB2--endothelial	B2M	myeloid	LILRB2	endothelial	1	1	2	3	9.09091	7.69231	20	13.0435	0.559571
4434	B2M--myeloid--CD3G--stromal	B2M	myeloid	CD3G	stromal	2	1	2	3	18.1818	7.69231	20	13.0435	0.559571
4435	B2M--myeloid--KLRD1--stromal	B2M	myeloid	KLRD1	stromal	3	1	2	3	27.2727	7.69231	20	13.0435	0.559571
4436	B2M--myeloid--KLRC1--stromal	B2M	myeloid	KLRC1	stromal	3	1	2	3	27.2727	7.69231	20	13.0435	0.559571
241	ICAM1--epithelial--MUC1--epithelial	ICAM1	epithelial	MUC1	epithelial	11	12	8	20	100	92.3077	80	86.9565	0.559571
324	CD59--endothelial--CD2--stromal	CD59	endothelial	CD2	stromal	10	12	8	20	90.9091	92.3077	80	86.9565	0.559571
345	CD59--endothelial--STAB1--epithelial	CD59	endothelial	STAB1	epithelial	9	12	8	20	81.8182	92.3077	80	86.9565	0.559571
437	SEMA5A--lymphocyte--MET--epithelial	SEMA5A	lymphocyte	MET	epithelial	10	12	8	20	90.9091	92.3077	80	86.9565	0.559571
521	B2M--endothelial--TFRC--myeloid	B2M	endothelial	TFRC	myeloid	11	12	8	20	100	92.3077	80	86.9565	0.559571
523	C3--epithelial--C5AR2--myeloid	C3	epithelial	C5AR2	myeloid	8	12	8	20	72.7273	92.3077	80	86.9565	0.559571
532	S100A8--myeloid--TLR4--myeloid	S100A8	myeloid	TLR4	myeloid	10	12	8	20	90.9091	92.3077	80	86.9565	0.559571
535	VEGFA--myeloid--NRP1--myeloid	VEGFA	myeloid	NRP1	myeloid	8	12	8	20	72.7273	92.3077	80	86.9565	0.559571
575	RARRES1--stromal--NRP2--epithelial	RARRES1	stromal	NRP2	epithelial	11	12	8	20	100	92.3077	80	86.9565	0.559571
582	ALCAM--myeloid--NRP1--endothelial	ALCAM	myeloid	NRP1	endothelial	11	12	8	20	100	92.3077	80	86.9565	0.559571
625	EREG--stromal--ERBB3--epithelial	EREG	stromal	ERBB3	epithelial	6	12	8	20	54.5455	92.3077	80	86.9565	0.559571
712	HSP90AA1--endothelial--EGFR--stromal	HSP90AA1	endothelial	EGFR	stromal	9	12	8	20	81.8182	92.3077	80	86.9565	0.559571
731	TIMP3--endothelial--CD44--lymphocyte	TIMP3	endothelial	CD44	lymphocyte	11	12	8	20	100	92.3077	80	86.9565	0.559571
789	PRG4--myeloid--TLR4--myeloid	PRG4	myeloid	TLR4	myeloid	10	12	8	20	90.9091	92.3077	80	86.9565	0.559571
796	SLPI--epithelial--PLSCR1--endothelial	SLPI	epithelial	PLSCR1	endothelial	10	12	8	20	90.9091	92.3077	80	86.9565	0.559571
802	VEGFA--myeloid--EGFR--stromal	VEGFA	myeloid	EGFR	stromal	10	12	8	20	90.9091	92.3077	80	86.9565	0.559571
811	DCN--epithelial--TLR4--myeloid	DCN	epithelial	TLR4	myeloid	6	12	8	20	54.5455	92.3077	80	86.9565	0.559571
838	SLPI--myeloid--PLSCR1--myeloid	SLPI	myeloid	PLSCR1	myeloid	11	12	8	20	100	92.3077	80	86.9565	0.559571
897	ICAM1--endothelial--IL2RA--myeloid	ICAM1	endothelial	IL2RA	myeloid	9	12	8	20	81.8182	92.3077	80	86.9565	0.559571
939	CADM1--epithelial--CRTAM--stromal	CADM1	epithelial	CRTAM	stromal	10	12	8	20	90.9091	92.3077	80	86.9565	0.559571
940	CRTAM--stromal--CADM1--epithelial	CRTAM	stromal	CADM1	epithelial	10	12	8	20	90.9091	92.3077	80	86.9565	0.559571
954	ADAM28--myeloid--ITGA4--stromal	ADAM28	myeloid	ITGA4	stromal	9	12	8	20	81.8182	92.3077	80	86.9565	0.559571
979	HDC--epithelial--HRH1--epithelial	HDC	epithelial	HRH1	epithelial	8	12	8	20	72.7273	92.3077	80	86.9565	0.559571
999	HDC--lymphocyte--HRH1--epithelial	HDC	lymphocyte	HRH1	epithelial	8	12	8	20	72.7273	92.3077	80	86.9565	0.559571
1011	SERPINE1--stromal--PLAUR--epithelial	SERPINE1	stromal	PLAUR	epithelial	10	12	8	20	90.9091	92.3077	80	86.9565	0.559571
1014	HDC--stromal--HRH1--epithelial	HDC	stromal	HRH1	epithelial	8	12	8	20	72.7273	92.3077	80	86.9565	0.559571
1022	ADAM12--stromal--SDC4--stromal	ADAM12	stromal	SDC4	stromal	8	12	8	20	72.7273	92.3077	80	86.9565	0.559571
1035	SPON2--endothelial--ITGA4--lymphocyte	SPON2	endothelial	ITGA4	lymphocyte	11	12	8	20	100	92.3077	80	86.9565	0.559571
1073	PSAP--myeloid--AR--myeloid	PSAP	myeloid	AR	myeloid	9	12	8	20	81.8182	92.3077	80	86.9565	0.559571
1086	F13A1--endothelial--ITGA4--lymphocyte	F13A1	endothelial	ITGA4	lymphocyte	10	12	8	20	90.9091	92.3077	80	86.9565	0.559571
1106	PLA2G2A--endothelial--ITGA4--lymphocyte	PLA2G2A	endothelial	ITGA4	lymphocyte	10	12	8	20	90.9091	92.3077	80	86.9565	0.559571
1132	TFPI--stromal--F3--stromal	TFPI	stromal	F3	stromal	9	12	8	20	81.8182	92.3077	80	86.9565	0.559571
1138	B2M--lymphocyte--LILRB1--endothelial	B2M	lymphocyte	LILRB1	endothelial	10	12	8	20	90.9091	92.3077	80	86.9565	0.559571
1156	THBS1--myeloid--TNFRSF11B--epithelial	THBS1	myeloid	TNFRSF11B	epithelial	9	12	8	20	81.8182	92.3077	80	86.9565	0.559571
1159	ICAM1--epithelial--IL2RA--myeloid	ICAM1	epithelial	IL2RA	myeloid	8	12	8	20	72.7273	92.3077	80	86.9565	0.559571
1218	THBS1--myeloid--CD36--lymphocyte	THBS1	myeloid	CD36	lymphocyte	10	12	8	20	90.9091	92.3077	80	86.9565	0.559571
1255	THBS1--myeloid--TNFRSF11B--stromal	THBS1	myeloid	TNFRSF11B	stromal	11	12	8	20	100	92.3077	80	86.9565	0.559571
1263	THBS1--myeloid--SDC4--stromal	THBS1	myeloid	SDC4	stromal	11	12	8	20	100	92.3077	80	86.9565	0.559571
1279	B2M--myeloid--LILRB1--myeloid	B2M	myeloid	LILRB1	myeloid	9	12	8	20	81.8182	92.3077	80	86.9565	0.559571
1286	ALCAM--myeloid--NRP1--stromal	ALCAM	myeloid	NRP1	stromal	10	12	8	20	90.9091	92.3077	80	86.9565	0.559571
1315	HLA-A--lymphocyte--CD8A--myeloid	HLA-A	lymphocyte	CD8A	myeloid	7	12	8	20	63.6364	92.3077	80	86.9565	0.559571
1364	THBS1--epithelial--ITGA4--lymphocyte	THBS1	epithelial	ITGA4	lymphocyte	7	12	8	20	63.6364	92.3077	80	86.9565	0.559571
1437	ALCAM--epithelial--NRP1--endothelial	ALCAM	epithelial	NRP1	endothelial	8	12	8	20	72.7273	92.3077	80	86.9565	0.559571
1529	THBS1--myeloid--CD36--stromal	THBS1	myeloid	CD36	stromal	11	12	8	20	100	92.3077	80	86.9565	0.559571
1537	CD22--lymphocyte--PTPRC--myeloid	CD22	lymphocyte	PTPRC	myeloid	10	12	8	20	90.9091	92.3077	80	86.9565	0.559571
1654	HLA-A--epithelial--CD8A--lymphocyte	HLA-A	epithelial	CD8A	lymphocyte	10	12	8	20	90.9091	92.3077	80	86.9565	0.559571
1735	LAMA3--epithelial--CD44--stromal	LAMA3	epithelial	CD44	stromal	10	12	8	20	90.9091	92.3077	80	86.9565	0.559571
1774	THBS1--lymphocyte--ITGA4--lymphocyte	THBS1	lymphocyte	ITGA4	lymphocyte	9	12	8	20	81.8182	92.3077	80	86.9565	0.559571
1828	THBS2--lymphocyte--ITGA4--lymphocyte	THBS2	lymphocyte	ITGA4	lymphocyte	9	12	8	20	81.8182	92.3077	80	86.9565	0.559571
1842	ICAM1--stromal--EGFR--stromal	ICAM1	stromal	EGFR	stromal	10	12	8	20	90.9091	92.3077	80	86.9565	0.559571
2118	HAS2--stromal--CD44--myeloid	HAS2	stromal	CD44	myeloid	10	12	8	20	90.9091	92.3077	80	86.9565	0.559571
2164	VCAN--lymphocyte--ITGA4--lymphocyte	VCAN	lymphocyte	ITGA4	lymphocyte	10	12	8	20	90.9091	92.3077	80	86.9565	0.559571
2207	CCL20--endothelial--CCR6--lymphocyte	CCL20	endothelial	CCR6	lymphocyte	7	12	8	20	63.6364	92.3077	80	86.9565	0.559571
2247	COL14A1--stromal--CD44--lymphocyte	COL14A1	stromal	CD44	lymphocyte	10	12	8	20	90.9091	92.3077	80	86.9565	0.559571
2264	THBS2--stromal--ITGA4--stromal	THBS2	stromal	ITGA4	stromal	11	12	8	20	100	92.3077	80	86.9565	0.559571
2313	THBS2--stromal--CD47--stromal	THBS2	stromal	CD47	stromal	11	12	8	20	100	92.3077	80	86.9565	0.559571
1092	PDGFB--epithelial--PDGFRB--stromal	PDGFB	epithelial	PDGFRB	stromal	1	3	1	4	9.09091	23.0769	10	17.3913	0.603614
1253	NCAM1--lymphocyte--FGFR2--lymphocyte	NCAM1	lymphocyte	FGFR2	lymphocyte	1	3	1	4	9.09091	23.0769	10	17.3913	0.603614
1277	EFNB2--stromal--PECAM1--lymphocyte	EFNB2	stromal	PECAM1	lymphocyte	3	3	1	4	27.2727	23.0769	10	17.3913	0.603614
1313	PGF--endothelial--FLT1--epithelial	PGF	endothelial	FLT1	epithelial	6	3	1	4	54.5455	23.0769	10	17.3913	0.603614
1335	WNT5A--epithelial--ANTXR1--stromal	WNT5A	epithelial	ANTXR1	stromal	3	3	1	4	27.2727	23.0769	10	17.3913	0.603614
1403	ADAM28--epithelial--ITGA4--endothelial	ADAM28	epithelial	ITGA4	endothelial	3	3	1	4	27.2727	23.0769	10	17.3913	0.603614
1515	PGF--endothelial--NRP1--lymphocyte	PGF	endothelial	NRP1	lymphocyte	3	3	1	4	27.2727	23.0769	10	17.3913	0.603614
1667	EFNB2--stromal--EPHA3--endothelial	EFNB2	stromal	EPHA3	endothelial	1	3	1	4	9.09091	23.0769	10	17.3913	0.603614
1671	WNT5A--stromal--EPHA7--epithelial	WNT5A	stromal	EPHA7	epithelial	3	3	1	4	27.2727	23.0769	10	17.3913	0.603614
1731	MMP2--stromal--FGFR1--epithelial	MMP2	stromal	FGFR1	epithelial	3	3	1	4	27.2727	23.0769	10	17.3913	0.603614
1736	PDGFB--lymphocyte--PDGFRB--stromal	PDGFB	lymphocyte	PDGFRB	stromal	1	3	1	4	9.09091	23.0769	10	17.3913	0.603614
1738	ANXA1--endothelial--EGFR--stromal	ANXA1	endothelial	EGFR	stromal	4	3	1	4	36.3636	23.0769	10	17.3913	0.603614
1740	CXCL12--endothelial--AVPR1A--epithelial	CXCL12	endothelial	AVPR1A	epithelial	5	3	1	4	45.4545	23.0769	10	17.3913	0.603614
1832	SEMA3A--myeloid--NRP2--endothelial	SEMA3A	myeloid	NRP2	endothelial	4	3	1	4	36.3636	23.0769	10	17.3913	0.603614
1840	SLIT3--epithelial--ROBO4--myeloid	SLIT3	epithelial	ROBO4	myeloid	1	3	1	4	9.09091	23.0769	10	17.3913	0.603614
1948	LAMA3--stromal--CD44--stromal	LAMA3	stromal	CD44	stromal	1	3	1	4	9.09091	23.0769	10	17.3913	0.603614
1977	WNT5A--stromal--MCAM--lymphocyte	WNT5A	stromal	MCAM	lymphocyte	5	3	1	4	45.4545	23.0769	10	17.3913	0.603614
1990	CXCL12--stromal--SDC4--endothelial	CXCL12	stromal	SDC4	endothelial	2	3	1	4	18.1818	23.0769	10	17.3913	0.603614
2024	ADM--endothelial--CALCRL--stromal	ADM	endothelial	CALCRL	stromal	2	3	1	4	18.1818	23.0769	10	17.3913	0.603614
2026	SLIT3--epithelial--ROBO4--stromal	SLIT3	epithelial	ROBO4	stromal	1	3	1	4	9.09091	23.0769	10	17.3913	0.603614
2048	VEGFA--myeloid--FLT1--epithelial	VEGFA	myeloid	FLT1	epithelial	4	3	1	4	36.3636	23.0769	10	17.3913	0.603614
2141	VWF--lymphocyte--TNFRSF11B--endothelial	VWF	lymphocyte	TNFRSF11B	endothelial	0	3	1	4	0	23.0769	10	17.3913	0.603614
2226	PLA2G2A--myeloid--EGFR--stromal	PLA2G2A	myeloid	EGFR	stromal	3	3	1	4	27.2727	23.0769	10	17.3913	0.603614
2267	DCN--stromal--TLR4--lymphocyte	DCN	stromal	TLR4	lymphocyte	4	3	1	4	36.3636	23.0769	10	17.3913	0.603614
2318	COL4A4--epithelial--CD44--lymphocyte	COL4A4	epithelial	CD44	lymphocyte	3	3	1	4	27.2727	23.0769	10	17.3913	0.603614
2354	COMP--stromal--CD36--epithelial	COMP	stromal	CD36	epithelial	2	3	1	4	18.1818	23.0769	10	17.3913	0.603614
2387	APOD--stromal--LEPR--endothelial	APOD	stromal	LEPR	endothelial	3	3	1	4	27.2727	23.0769	10	17.3913	0.603614
2407	ICAM1--lymphocyte--CAV1--stromal	ICAM1	lymphocyte	CAV1	stromal	1	3	1	4	9.09091	23.0769	10	17.3913	0.603614
2414	CCL2--myeloid--ACKR1--myeloid	CCL2	myeloid	ACKR1	myeloid	0	3	1	4	0	23.0769	10	17.3913	0.603614
2469	CCN4--epithelial--ITGA5--stromal	CCN4	epithelial	ITGA5	stromal	1	3	1	4	9.09091	23.0769	10	17.3913	0.603614
2511	LGI4--stromal--ADAM23--stromal	LGI4	stromal	ADAM23	stromal	1	3	1	4	9.09091	23.0769	10	17.3913	0.603614
2554	CXCL12--myeloid--ITGA4--myeloid	CXCL12	myeloid	ITGA4	myeloid	1	3	1	4	9.09091	23.0769	10	17.3913	0.603614
2555	LAMB3--epithelial--ITGA6--lymphocyte	LAMB3	epithelial	ITGA6	lymphocyte	2	3	1	4	18.1818	23.0769	10	17.3913	0.603614
2605	IGLC1--stromal--FCGR2B--myeloid	IGLC1	stromal	FCGR2B	myeloid	2	3	1	4	18.1818	23.0769	10	17.3913	0.603614
2649	B2M--endothelial--LILRB2--lymphocyte	B2M	endothelial	LILRB2	lymphocyte	4	3	1	4	36.3636	23.0769	10	17.3913	0.603614
2674	FGF9--endothelial--FGFR1--stromal	FGF9	endothelial	FGFR1	stromal	7	3	1	4	63.6364	23.0769	10	17.3913	0.603614
2757	IL1B--myeloid--IL1R2--stromal	IL1B	myeloid	IL1R2	stromal	3	3	1	4	27.2727	23.0769	10	17.3913	0.603614
2816	VEGFA--stromal--KDR--epithelial	VEGFA	stromal	KDR	epithelial	2	3	1	4	18.1818	23.0769	10	17.3913	0.603614
2882	CCL2--myeloid--ACKR1--lymphocyte	CCL2	myeloid	ACKR1	lymphocyte	0	3	1	4	0	23.0769	10	17.3913	0.603614
2905	IL1B--epithelial--IL1R2--stromal	IL1B	epithelial	IL1R2	stromal	0	3	1	4	0	23.0769	10	17.3913	0.603614
2941	NLGN4X--epithelial--NRXN1--endothelial	NLGN4X	epithelial	NRXN1	endothelial	0	3	1	4	0	23.0769	10	17.3913	0.603614
2959	APOE--myeloid--ABCA1--endothelial	APOE	myeloid	ABCA1	endothelial	1	3	1	4	9.09091	23.0769	10	17.3913	0.603614
2977	APOE--myeloid--ABCA1--lymphocyte	APOE	myeloid	ABCA1	lymphocyte	0	3	1	4	0	23.0769	10	17.3913	0.603614
2993	COMP--stromal--CD47--endothelial	COMP	stromal	CD47	endothelial	2	3	1	4	18.1818	23.0769	10	17.3913	0.603614
2995	WNT5A--epithelial--EPHA7--stromal	WNT5A	epithelial	EPHA7	stromal	1	3	1	4	9.09091	23.0769	10	17.3913	0.603614
3026	EFNB2--epithelial--EPHA3--stromal	EFNB2	epithelial	EPHA3	stromal	3	3	1	4	27.2727	23.0769	10	17.3913	0.603614
3054	FGF7--stromal--FGFR2--myeloid	FGF7	stromal	FGFR2	myeloid	6	3	1	4	54.5455	23.0769	10	17.3913	0.603614
3060	CSF3--endothelial--CSF3R--epithelial	CSF3	endothelial	CSF3R	epithelial	2	3	1	4	18.1818	23.0769	10	17.3913	0.603614
3068	EFNA5--lymphocyte--EPHA3--stromal	EFNA5	lymphocyte	EPHA3	stromal	3	3	1	4	27.2727	23.0769	10	17.3913	0.603614
3078	COL14A1--stromal--CD44--epithelial	COL14A1	stromal	CD44	epithelial	3	3	1	4	27.2727	23.0769	10	17.3913	0.603614
3093	LAMA3--endothelial--CD44--lymphocyte	LAMA3	endothelial	CD44	lymphocyte	2	3	1	4	18.1818	23.0769	10	17.3913	0.603614
3094	ANGPTL4--stromal--SDC4--endothelial	ANGPTL4	stromal	SDC4	endothelial	0	3	1	4	0	23.0769	10	17.3913	0.603614
3108	ACE--endothelial--BDKRB2--endothelial	ACE	endothelial	BDKRB2	endothelial	3	3	1	4	27.2727	23.0769	10	17.3913	0.603614
3148	CSF3--endothelial--CSF3R--lymphocyte	CSF3	endothelial	CSF3R	lymphocyte	2	3	1	4	18.1818	23.0769	10	17.3913	0.603614
3153	CCN2--stromal--FGFR2--myeloid	CCN2	stromal	FGFR2	myeloid	6	3	1	4	54.5455	23.0769	10	17.3913	0.603614
3154	HLA-A--epithelial--CD3G--epithelial	HLA-A	epithelial	CD3G	epithelial	0	3	1	4	0	23.0769	10	17.3913	0.603614
3168	ADM--stromal--ACKR3--myeloid	ADM	stromal	ACKR3	myeloid	2	3	1	4	18.1818	23.0769	10	17.3913	0.603614
3184	APOE--lymphocyte--ABCA1--stromal	APOE	lymphocyte	ABCA1	stromal	1	3	1	4	9.09091	23.0769	10	17.3913	0.603614
3212	CSF3--endothelial--CSF2RA--epithelial	CSF3	endothelial	CSF2RA	epithelial	1	3	1	4	9.09091	23.0769	10	17.3913	0.603614
3237	CXCL2--myeloid--ACKR1--lymphocyte	CXCL2	myeloid	ACKR1	lymphocyte	2	3	1	4	18.1818	23.0769	10	17.3913	0.603614
3268	B2M--endothelial--TFRC--epithelial	B2M	endothelial	TFRC	epithelial	3	3	1	4	27.2727	23.0769	10	17.3913	0.603614
3320	LAMA4--stromal--CD44--epithelial	LAMA4	stromal	CD44	epithelial	3	3	1	4	27.2727	23.0769	10	17.3913	0.603614
3388	TIMP3--stromal--CD44--epithelial	TIMP3	stromal	CD44	epithelial	3	3	1	4	27.2727	23.0769	10	17.3913	0.603614
3429	COL4A4--stromal--CD44--epithelial	COL4A4	stromal	CD44	epithelial	1	3	1	4	9.09091	23.0769	10	17.3913	0.603614
3432	SPARC--lymphocyte--FGFR1--stromal	SPARC	lymphocyte	FGFR1	stromal	1	3	1	4	9.09091	23.0769	10	17.3913	0.603614
3475	HGF--stromal--CD44--epithelial	HGF	stromal	CD44	epithelial	1	3	1	4	9.09091	23.0769	10	17.3913	0.603614
3522	LAMA3--epithelial--ITGA6--lymphocyte	LAMA3	epithelial	ITGA6	lymphocyte	1	3	1	4	9.09091	23.0769	10	17.3913	0.603614
3564	ECM1--myeloid--ITGB4--endothelial	ECM1	myeloid	ITGB4	endothelial	5	3	1	4	45.4545	23.0769	10	17.3913	0.603614
3596	FGF18--epithelial--FGFR2--endothelial	FGF18	epithelial	FGFR2	endothelial	2	3	1	4	18.1818	23.0769	10	17.3913	0.603614
3603	HGF--stromal--MET--stromal	HGF	stromal	MET	stromal	1	3	1	4	9.09091	23.0769	10	17.3913	0.603614
3610	FGF2--stromal--FGFR2--endothelial	FGF2	stromal	FGFR2	endothelial	2	3	1	4	18.1818	23.0769	10	17.3913	0.603614
3612	FGF2--stromal--FGFR2--lymphocyte	FGF2	stromal	FGFR2	lymphocyte	2	3	1	4	18.1818	23.0769	10	17.3913	0.603614
3812	CCN1--epithelial--TLR4--endothelial	CCN1	epithelial	TLR4	endothelial	1	3	1	4	9.09091	23.0769	10	17.3913	0.603614
3825	WNT5A--epithelial--LDLR--endothelial	WNT5A	epithelial	LDLR	endothelial	4	3	1	4	36.3636	23.0769	10	17.3913	0.603614
3827	S100A10--endothelial--CFTR--endothelial	S100A10	endothelial	CFTR	endothelial	5	3	1	4	45.4545	23.0769	10	17.3913	0.603614
3838	APOE--epithelial--LDLR--endothelial	APOE	epithelial	LDLR	endothelial	0	3	1	4	0	23.0769	10	17.3913	0.603614
3844	IL11--stromal--IL6R--endothelial	IL11	stromal	IL6R	endothelial	1	3	1	4	9.09091	23.0769	10	17.3913	0.603614
3878	EREG--epithelial--ERBB3--lymphocyte	EREG	epithelial	ERBB3	lymphocyte	0	3	1	4	0	23.0769	10	17.3913	0.603614
3927	LGALS1--myeloid--CD69--myeloid	LGALS1	myeloid	CD69	myeloid	1	3	1	4	9.09091	23.0769	10	17.3913	0.603614
3939	PGF--lymphocyte--NRP1--stromal	PGF	lymphocyte	NRP1	stromal	4	3	1	4	36.3636	23.0769	10	17.3913	0.603614
3988	TNF--myeloid--TNFRSF1B--endothelial	TNF	myeloid	TNFRSF1B	endothelial	1	3	1	4	9.09091	23.0769	10	17.3913	0.603614
3991	TGM2--endothelial--ITGA4--endothelial	TGM2	endothelial	ITGA4	endothelial	0	3	1	4	0	23.0769	10	17.3913	0.603614
4021	TNF--stromal--TNFRSF1B--endothelial	TNF	stromal	TNFRSF1B	endothelial	1	3	1	4	9.09091	23.0769	10	17.3913	0.603614
4088	GREM1--stromal--KDR--lymphocyte	GREM1	stromal	KDR	lymphocyte	1	3	1	4	9.09091	23.0769	10	17.3913	0.603614
4157	B2M--endothelial--TFRC--lymphocyte	B2M	endothelial	TFRC	lymphocyte	3	3	1	4	27.2727	23.0769	10	17.3913	0.603614
475	ADM--epithelial--ACKR3--endothelial	ADM	epithelial	ACKR3	endothelial	5	10	9	19	45.4545	76.9231	90	82.6087	0.603614
531	PLAU--stromal--ITGA3--epithelial	PLAU	stromal	ITGA3	epithelial	10	10	9	19	90.9091	76.9231	90	82.6087	0.603614
542	ADM--stromal--ACKR3--endothelial	ADM	stromal	ACKR3	endothelial	5	10	9	19	45.4545	76.9231	90	82.6087	0.603614
564	NCAM1--endothelial--FGFR2--epithelial	NCAM1	endothelial	FGFR2	epithelial	10	10	9	19	90.9091	76.9231	90	82.6087	0.603614
648	WNT7A--epithelial--LDLR--endothelial	WNT7A	epithelial	LDLR	endothelial	11	10	9	19	100	76.9231	90	82.6087	0.603614
746	FGF2--myeloid--FGFR2--epithelial	FGF2	myeloid	FGFR2	epithelial	8	10	9	19	72.7273	76.9231	90	82.6087	0.603614
758	HSPA1A--endothelial--TLR4--endothelial	HSPA1A	endothelial	TLR4	endothelial	8	10	9	19	72.7273	76.9231	90	82.6087	0.603614
890	HSP90AA1--myeloid--CFTR--epithelial	HSP90AA1	myeloid	CFTR	epithelial	9	10	9	19	81.8182	76.9231	90	82.6087	0.603614
987	TNF--epithelial--FLT4--endothelial	TNF	epithelial	FLT4	endothelial	10	10	9	19	90.9091	76.9231	90	82.6087	0.603614
1025	PDGFB--myeloid--S1PR1--stromal	PDGFB	myeloid	S1PR1	stromal	7	10	9	19	63.6364	76.9231	90	82.6087	0.603614
1044	COL1A1--stromal--CD36--myeloid	COL1A1	stromal	CD36	myeloid	9	10	9	19	81.8182	76.9231	90	82.6087	0.603614
1090	HSPG2--endothelial--FGFR1--myeloid	HSPG2	endothelial	FGFR1	myeloid	11	10	9	19	100	76.9231	90	82.6087	0.603614
1113	LGALS1--endothelial--CD69--lymphocyte	LGALS1	endothelial	CD69	lymphocyte	10	10	9	19	90.9091	76.9231	90	82.6087	0.603614
1237	HSPG2--endothelial--FGFR1--lymphocyte	HSPG2	endothelial	FGFR1	lymphocyte	10	10	9	19	90.9091	76.9231	90	82.6087	0.603614
1276	TNF--myeloid--FLT4--endothelial	TNF	myeloid	FLT4	endothelial	7	10	9	19	63.6364	76.9231	90	82.6087	0.603614
1342	COMP--epithelial--CD36--endothelial	COMP	epithelial	CD36	endothelial	7	10	9	19	63.6364	76.9231	90	82.6087	0.603614
1373	CCL5--lymphocyte--ACKR1--epithelial	CCL5	lymphocyte	ACKR1	epithelial	9	10	9	19	81.8182	76.9231	90	82.6087	0.603614
1622	EFNB2--stromal--EPHA3--stromal	EFNB2	stromal	EPHA3	stromal	7	10	9	19	63.6364	76.9231	90	82.6087	0.603614
1657	SEMA4A--endothelial--LILRB2--myeloid	SEMA4A	endothelial	LILRB2	myeloid	8	10	9	19	72.7273	76.9231	90	82.6087	0.603614
1689	COL1A1--epithelial--CD36--endothelial	COL1A1	epithelial	CD36	endothelial	5	10	9	19	45.4545	76.9231	90	82.6087	0.603614
1741	HLA-A--endothelial--CD3G--lymphocyte	HLA-A	endothelial	CD3G	lymphocyte	10	10	9	19	90.9091	76.9231	90	82.6087	0.603614
2147	HSPA8--myeloid--LDLR--epithelial	HSPA8	myeloid	LDLR	epithelial	7	10	9	19	63.6364	76.9231	90	82.6087	0.603614
2222	COL14A1--stromal--CD44--stromal	COL14A1	stromal	CD44	stromal	10	10	9	19	90.9091	76.9231	90	82.6087	0.603614
2512	DEFB1--endothelial--CCR6--lymphocyte	DEFB1	endothelial	CCR6	lymphocyte	11	10	9	19	100	76.9231	90	82.6087	0.603614
2517	B2M--lymphocyte--CD247--epithelial	B2M	lymphocyte	CD247	epithelial	9	10	9	19	81.8182	76.9231	90	82.6087	0.603614
2607	WNT5A--epithelial--LDLR--epithelial	WNT5A	epithelial	LDLR	epithelial	9	10	9	19	81.8182	76.9231	90	82.6087	0.603614
2700	WNT7A--stromal--LDLR--epithelial	WNT7A	stromal	LDLR	epithelial	9	10	9	19	81.8182	76.9231	90	82.6087	0.603614
2735	FGF7--stromal--FGFR2--stromal	FGF7	stromal	FGFR2	stromal	10	10	9	19	90.9091	76.9231	90	82.6087	0.603614
1365	IGF1--stromal--INSR--epithelial	IGF1	stromal	INSR	epithelial	3	2	3	5	27.2727	15.3846	30	21.7391	0.617522
1514	B2M--myeloid--TFRC--stromal	B2M	myeloid	TFRC	stromal	3	2	3	5	27.2727	15.3846	30	21.7391	0.617522
1760	LAMB1--endothelial--ITGA1--lymphocyte	LAMB1	endothelial	ITGA1	lymphocyte	4	2	3	5	36.3636	15.3846	30	21.7391	0.617522
2077	CXCL8--stromal--KDR--stromal	CXCL8	stromal	KDR	stromal	4	2	3	5	36.3636	15.3846	30	21.7391	0.617522
2199	CXCL14--lymphocyte--CXCR4--myeloid	CXCL14	lymphocyte	CXCR4	myeloid	3	2	3	5	27.2727	15.3846	30	21.7391	0.617522
2221	CCN1--stromal--CAV1--myeloid	CCN1	stromal	CAV1	myeloid	5	2	3	5	45.4545	15.3846	30	21.7391	0.617522
2322	CCN1--stromal--TLR4--lymphocyte	CCN1	stromal	TLR4	lymphocyte	5	2	3	5	45.4545	15.3846	30	21.7391	0.617522
2386	HSPG2--stromal--ITGA2--stromal	HSPG2	stromal	ITGA2	stromal	3	2	3	5	27.2727	15.3846	30	21.7391	0.617522
2558	THBS1--endothelial--ITGA6--epithelial	THBS1	endothelial	ITGA6	epithelial	4	2	3	5	36.3636	15.3846	30	21.7391	0.617522
2575	HBEGF--endothelial--PRLR--myeloid	HBEGF	endothelial	PRLR	myeloid	5	2	3	5	45.4545	15.3846	30	21.7391	0.617522
2594	ECM1--epithelial--ITGB4--endothelial	ECM1	epithelial	ITGB4	endothelial	7	2	3	5	63.6364	15.3846	30	21.7391	0.617522
2646	TNF--lymphocyte--TRPM2--epithelial	TNF	lymphocyte	TRPM2	epithelial	4	2	3	5	36.3636	15.3846	30	21.7391	0.617522
2658	HBEGF--endothelial--PRLR--endothelial	HBEGF	endothelial	PRLR	endothelial	4	2	3	5	36.3636	15.3846	30	21.7391	0.617522
2681	MMP7--myeloid--CD44--lymphocyte	MMP7	myeloid	CD44	lymphocyte	2	2	3	5	18.1818	15.3846	30	21.7391	0.617522
2710	HGF--lymphocyte--CD44--lymphocyte	HGF	lymphocyte	CD44	lymphocyte	2	2	3	5	18.1818	15.3846	30	21.7391	0.617522
2722	LAMC3--lymphocyte--CD44--lymphocyte	LAMC3	lymphocyte	CD44	lymphocyte	2	2	3	5	18.1818	15.3846	30	21.7391	0.617522
2730	MMP7--lymphocyte--CD44--lymphocyte	MMP7	lymphocyte	CD44	lymphocyte	4	2	3	5	36.3636	15.3846	30	21.7391	0.617522
2776	VEGFA--stromal--NRP1--epithelial	VEGFA	stromal	NRP1	epithelial	3	2	3	5	27.2727	15.3846	30	21.7391	0.617522
2792	TIMP3--lymphocyte--KDR--endothelial	TIMP3	lymphocyte	KDR	endothelial	2	2	3	5	18.1818	15.3846	30	21.7391	0.617522
2811	FGF2--lymphocyte--CD44--myeloid	FGF2	lymphocyte	CD44	myeloid	5	2	3	5	45.4545	15.3846	30	21.7391	0.617522
2832	LAMB1--epithelial--CD44--myeloid	LAMB1	epithelial	CD44	myeloid	2	2	3	5	18.1818	15.3846	30	21.7391	0.617522
2847	TIMP2--lymphocyte--CD44--myeloid	TIMP2	lymphocyte	CD44	myeloid	3	2	3	5	27.2727	15.3846	30	21.7391	0.617522
2851	FN1--epithelial--CD44--myeloid	FN1	epithelial	CD44	myeloid	2	2	3	5	18.1818	15.3846	30	21.7391	0.617522
2853	COL1A1--epithelial--CD44--myeloid	COL1A1	epithelial	CD44	myeloid	1	2	3	5	9.09091	15.3846	30	21.7391	0.617522
2861	THBS1--stromal--SDC4--lymphocyte	THBS1	stromal	SDC4	lymphocyte	4	2	3	5	36.3636	15.3846	30	21.7391	0.617522
2865	FGF2--myeloid--FGFR1--stromal	FGF2	myeloid	FGFR1	stromal	3	2	3	5	27.2727	15.3846	30	21.7391	0.617522
2892	SEMA3A--epithelial--NRP2--myeloid	SEMA3A	epithelial	NRP2	myeloid	1	2	3	5	9.09091	15.3846	30	21.7391	0.617522
2909	PDGFB--epithelial--S1PR1--epithelial	PDGFB	epithelial	S1PR1	epithelial	5	2	3	5	45.4545	15.3846	30	21.7391	0.617522
3073	PGF--stromal--NRP2--myeloid	PGF	stromal	NRP2	myeloid	2	2	3	5	18.1818	15.3846	30	21.7391	0.617522
3535	LAMA3--endothelial--ITGB4--endothelial	LAMA3	endothelial	ITGB4	endothelial	4	2	3	5	36.3636	15.3846	30	21.7391	0.617522
3921	PRG4--myeloid--TLR4--endothelial	PRG4	myeloid	TLR4	endothelial	1	2	3	5	9.09091	15.3846	30	21.7391	0.617522
3955	IL15--epithelial--IL2RA--epithelial	IL15	epithelial	IL2RA	epithelial	0	2	3	5	0	15.3846	30	21.7391	0.617522
4077	TNF--epithelial--TNFRSF1B--stromal	TNF	epithelial	TNFRSF1B	stromal	1	2	3	5	9.09091	15.3846	30	21.7391	0.617522
4089	WNT5A--myeloid--LDLR--endothelial	WNT5A	myeloid	LDLR	endothelial	1	2	3	5	9.09091	15.3846	30	21.7391	0.617522
4152	LAMA3--epithelial--ITGB4--myeloid	LAMA3	epithelial	ITGB4	myeloid	3	2	3	5	27.2727	15.3846	30	21.7391	0.617522
4158	CSF3--epithelial--CSF3R--lymphocyte	CSF3	epithelial	CSF3R	lymphocyte	1	2	3	5	9.09091	15.3846	30	21.7391	0.617522
4163	CSF3--epithelial--CSF2RA--endothelial	CSF3	epithelial	CSF2RA	endothelial	1	2	3	5	9.09091	15.3846	30	21.7391	0.617522
4167	CSF3--epithelial--CSF1R--lymphocyte	CSF3	epithelial	CSF1R	lymphocyte	1	2	3	5	9.09091	15.3846	30	21.7391	0.617522
4181	CSF3--epithelial--CSF3R--epithelial	CSF3	epithelial	CSF3R	epithelial	1	2	3	5	9.09091	15.3846	30	21.7391	0.617522
4182	CSF3--epithelial--CSF2RA--epithelial	CSF3	epithelial	CSF2RA	epithelial	1	2	3	5	9.09091	15.3846	30	21.7391	0.617522
202	CP--epithelial--SLC40A1--epithelial	CP	epithelial	SLC40A1	epithelial	9	11	7	18	81.8182	84.6154	70	78.2609	0.617522
234	RSPO3--lymphocyte--LGR5--epithelial	RSPO3	lymphocyte	LGR5	epithelial	8	11	7	18	72.7273	84.6154	70	78.2609	0.617522
312	B2M--myeloid--KLRC2--lymphocyte	B2M	myeloid	KLRC2	lymphocyte	8	11	7	18	72.7273	84.6154	70	78.2609	0.617522
382	CD59--endothelial--CD2--endothelial	CD59	endothelial	CD2	endothelial	9	11	7	18	81.8182	84.6154	70	78.2609	0.617522
406	ALCAM--myeloid--NRP1--myeloid	ALCAM	myeloid	NRP1	myeloid	10	11	7	18	90.9091	84.6154	70	78.2609	0.617522
438	SEMA5A--endothelial--MET--epithelial	SEMA5A	endothelial	MET	epithelial	10	11	7	18	90.9091	84.6154	70	78.2609	0.617522
471	PGF--endothelial--NRP1--endothelial	PGF	endothelial	NRP1	endothelial	11	11	7	18	100	84.6154	70	78.2609	0.617522
539	PGF--epithelial--NRP2--epithelial	PGF	epithelial	NRP2	epithelial	9	11	7	18	81.8182	84.6154	70	78.2609	0.617522
555	PGF--lymphocyte--NRP2--epithelial	PGF	lymphocyte	NRP2	epithelial	9	11	7	18	81.8182	84.6154	70	78.2609	0.617522
567	IL1B--myeloid--IL1R2--myeloid	IL1B	myeloid	IL1R2	myeloid	6	11	7	18	54.5455	84.6154	70	78.2609	0.617522
628	RARRES1--epithelial--NRP2--epithelial	RARRES1	epithelial	NRP2	epithelial	8	11	7	18	72.7273	84.6154	70	78.2609	0.617522
660	S100A8--endothelial--TLR4--myeloid	S100A8	endothelial	TLR4	myeloid	9	11	7	18	81.8182	84.6154	70	78.2609	0.617522
705	VEGFA--myeloid--NRP2--endothelial	VEGFA	myeloid	NRP2	endothelial	9	11	7	18	81.8182	84.6154	70	78.2609	0.617522
755	EFNB2--endothelial--PECAM1--myeloid	EFNB2	endothelial	PECAM1	myeloid	11	11	7	18	100	84.6154	70	78.2609	0.617522
785	BGN--endothelial--TLR4--myeloid	BGN	endothelial	TLR4	myeloid	6	11	7	18	54.5455	84.6154	70	78.2609	0.617522
791	CADM1--epithelial--CRTAM--myeloid	CADM1	epithelial	CRTAM	myeloid	9	11	7	18	81.8182	84.6154	70	78.2609	0.617522
792	CRTAM--myeloid--CADM1--epithelial	CRTAM	myeloid	CADM1	epithelial	9	11	7	18	81.8182	84.6154	70	78.2609	0.617522
824	TFPI--stromal--SDC4--epithelial	TFPI	stromal	SDC4	epithelial	9	11	7	18	81.8182	84.6154	70	78.2609	0.617522
881	ICAM1--endothelial--CAV1--endothelial	ICAM1	endothelial	CAV1	endothelial	10	11	7	18	90.9091	84.6154	70	78.2609	0.617522
906	IL6--endothelial--HRH1--epithelial	IL6	endothelial	HRH1	epithelial	9	11	7	18	81.8182	84.6154	70	78.2609	0.617522
929	NAMPT--stromal--INSR--endothelial	NAMPT	stromal	INSR	endothelial	10	11	7	18	90.9091	84.6154	70	78.2609	0.617522
961	VEGFA--stromal--NRP1--endothelial	VEGFA	stromal	NRP1	endothelial	11	11	7	18	100	84.6154	70	78.2609	0.617522
963	C3--epithelial--NRP1--endothelial	C3	epithelial	NRP1	endothelial	8	11	7	18	72.7273	84.6154	70	78.2609	0.617522
1019	NAMPT--endothelial--INSR--endothelial	NAMPT	endothelial	INSR	endothelial	10	11	7	18	90.9091	84.6154	70	78.2609	0.617522
1084	COL1A1--stromal--CD36--lymphocyte	COL1A1	stromal	CD36	lymphocyte	8	11	7	18	72.7273	84.6154	70	78.2609	0.617522
1140	B2M--lymphocyte--CD3G--endothelial	B2M	lymphocyte	CD3G	endothelial	8	11	7	18	72.7273	84.6154	70	78.2609	0.617522
1145	HSPG2--epithelial--FGFR1--stromal	HSPG2	epithelial	FGFR1	stromal	7	11	7	18	63.6364	84.6154	70	78.2609	0.617522
1220	CD55--epithelial--ADGRE2--stromal	CD55	epithelial	ADGRE2	stromal	8	11	7	18	72.7273	84.6154	70	78.2609	0.617522
1238	THBS1--myeloid--CD47--endothelial	THBS1	myeloid	CD47	endothelial	9	11	7	18	81.8182	84.6154	70	78.2609	0.617522
1240	HLA-A--lymphocyte--CD3G--myeloid	HLA-A	lymphocyte	CD3G	myeloid	8	11	7	18	72.7273	84.6154	70	78.2609	0.617522
1274	TIMP3--endothelial--MET--myeloid	TIMP3	endothelial	MET	myeloid	10	11	7	18	90.9091	84.6154	70	78.2609	0.617522
1292	THBS1--stromal--SDC4--epithelial	THBS1	stromal	SDC4	epithelial	9	11	7	18	81.8182	84.6154	70	78.2609	0.617522
1326	B2M--endothelial--CD3G--lymphocyte	B2M	endothelial	CD3G	lymphocyte	9	11	7	18	81.8182	84.6154	70	78.2609	0.617522
1433	THBS1--myeloid--ITGA6--lymphocyte	THBS1	myeloid	ITGA6	lymphocyte	10	11	7	18	90.9091	84.6154	70	78.2609	0.617522
1517	CCL5--lymphocyte--SDC4--lymphocyte	CCL5	lymphocyte	SDC4	lymphocyte	10	11	7	18	90.9091	84.6154	70	78.2609	0.617522
1552	C3--stromal--NRP1--endothelial	C3	stromal	NRP1	endothelial	8	11	7	18	72.7273	84.6154	70	78.2609	0.617522
1557	THBS1--myeloid--ITGA6--stromal	THBS1	myeloid	ITGA6	stromal	10	11	7	18	90.9091	84.6154	70	78.2609	0.617522
1579	THBS1--myeloid--SDC4--lymphocyte	THBS1	myeloid	SDC4	lymphocyte	10	11	7	18	90.9091	84.6154	70	78.2609	0.617522
1687	COL1A2--stromal--FLT4--epithelial	COL1A2	stromal	FLT4	epithelial	9	11	7	18	81.8182	84.6154	70	78.2609	0.617522
1709	VCAN--endothelial--ITGA4--lymphocyte	VCAN	endothelial	ITGA4	lymphocyte	8	11	7	18	72.7273	84.6154	70	78.2609	0.617522
1927	ALCAM--endothelial--CD6--lymphocyte	ALCAM	endothelial	CD6	lymphocyte	10	11	7	18	90.9091	84.6154	70	78.2609	0.617522
2355	FN1--stromal--TNFRSF11B--lymphocyte	FN1	stromal	TNFRSF11B	lymphocyte	9	11	7	18	81.8182	84.6154	70	78.2609	0.617522
2513	TNFSF10--myeloid--CCR6--lymphocyte	TNFSF10	myeloid	CCR6	lymphocyte	10	11	7	18	90.9091	84.6154	70	78.2609	0.617522
2760	PLTP--myeloid--ABCA1--myeloid	PLTP	myeloid	ABCA1	myeloid	9	11	7	18	81.8182	84.6154	70	78.2609	0.617522
1048	NCAM1--lymphocyte--GFRA1--lymphocyte	NCAM1	lymphocyte	GFRA1	lymphocyte	1	3	4	7	9.09091	23.0769	40	30.4348	0.65002
1670	MMP2--stromal--PECAM1--epithelial	MMP2	stromal	PECAM1	epithelial	2	3	4	7	18.1818	23.0769	40	30.4348	0.65002
1879	TNC--lymphocyte--ITGA5--endothelial	TNC	lymphocyte	ITGA5	endothelial	3	3	4	7	27.2727	23.0769	40	30.4348	0.65002
2027	LPL--myeloid--CD44--stromal	LPL	myeloid	CD44	stromal	1	3	4	7	9.09091	23.0769	40	30.4348	0.65002
2249	S100A8--lymphocyte--CD36--lymphocyte	S100A8	lymphocyte	CD36	lymphocyte	0	3	4	7	0	23.0769	40	30.4348	0.65002
2271	S100A10--epithelial--CFTR--stromal	S100A10	epithelial	CFTR	stromal	2	3	4	7	18.1818	23.0769	40	30.4348	0.65002
2401	LGI4--lymphocyte--ADAM22--stromal	LGI4	lymphocyte	ADAM22	stromal	3	3	4	7	27.2727	23.0769	40	30.4348	0.65002
2426	RSPO3--stromal--RNF43--lymphocyte	RSPO3	stromal	RNF43	lymphocyte	2	3	4	7	18.1818	23.0769	40	30.4348	0.65002
2515	SEMA5A--epithelial--MET--endothelial	SEMA5A	epithelial	MET	endothelial	4	3	4	7	36.3636	23.0769	40	30.4348	0.65002
2544	NCAM1--stromal--PTPRZ1--stromal	NCAM1	stromal	PTPRZ1	stromal	5	3	4	7	45.4545	23.0769	40	30.4348	0.65002
2599	LAMA3--stromal--ITGB4--endothelial	LAMA3	stromal	ITGB4	endothelial	7	3	4	7	63.6364	23.0769	40	30.4348	0.65002
2653	SELE--epithelial--CD44--lymphocyte	SELE	epithelial	CD44	lymphocyte	3	3	4	7	27.2727	23.0769	40	30.4348	0.65002
2720	COL4A4--lymphocyte--CD44--lymphocyte	COL4A4	lymphocyte	CD44	lymphocyte	3	3	4	7	27.2727	23.0769	40	30.4348	0.65002
3266	CXCL8--myeloid--ACKR1--epithelial	CXCL8	myeloid	ACKR1	epithelial	3	3	4	7	27.2727	23.0769	40	30.4348	0.65002
3366	ADCYAP1--myeloid--VIPR2--endothelial	ADCYAP1	myeloid	VIPR2	endothelial	2	3	4	7	18.1818	23.0769	40	30.4348	0.65002
3537	LAMA3--myeloid--ITGB4--endothelial	LAMA3	myeloid	ITGB4	endothelial	4	3	4	7	36.3636	23.0769	40	30.4348	0.65002
3634	LAMC2--endothelial--CD44--myeloid	LAMC2	endothelial	CD44	myeloid	5	3	4	7	45.4545	23.0769	40	30.4348	0.65002
3747	CCL20--epithelial--CCR6--myeloid	CCL20	epithelial	CCR6	myeloid	0	3	4	7	0	23.0769	40	30.4348	0.65002
4066	CXCL1--epithelial--ACKR1--myeloid	CXCL1	epithelial	ACKR1	myeloid	3	3	4	7	27.2727	23.0769	40	30.4348	0.65002
319	AREG--lymphocyte--ERBB3--lymphocyte	AREG	lymphocyte	ERBB3	lymphocyte	4	10	6	16	36.3636	76.9231	60	69.5652	0.65002
477	ADM--lymphocyte--ACKR3--endothelial	ADM	lymphocyte	ACKR3	endothelial	6	10	6	16	54.5455	76.9231	60	69.5652	0.65002
490	PLAU--epithelial--ITGA5--myeloid	PLAU	epithelial	ITGA5	myeloid	7	10	6	16	63.6364	76.9231	60	69.5652	0.65002
559	EDN1--endothelial--EDNRA--stromal	EDN1	endothelial	EDNRA	stromal	10	10	6	16	90.9091	76.9231	60	69.5652	0.65002
587	PLAU--myeloid--PLAUR--stromal	PLAU	myeloid	PLAUR	stromal	7	10	6	16	63.6364	76.9231	60	69.5652	0.65002
605	CXCL12--lymphocyte--ACKR3--endothelial	CXCL12	lymphocyte	ACKR3	endothelial	4	10	6	16	36.3636	76.9231	60	69.5652	0.65002
664	COL4A4--epithelial--CD47--epithelial	COL4A4	epithelial	CD47	epithelial	7	10	6	16	63.6364	76.9231	60	69.5652	0.65002
665	HGF--stromal--NRP1--myeloid	HGF	stromal	NRP1	myeloid	6	10	6	16	54.5455	76.9231	60	69.5652	0.65002
683	TGM2--endothelial--ITGA4--myeloid	TGM2	endothelial	ITGA4	myeloid	9	10	6	16	81.8182	76.9231	60	69.5652	0.65002
770	MDK--epithelial--SDC4--epithelial	MDK	epithelial	SDC4	epithelial	7	10	6	16	63.6364	76.9231	60	69.5652	0.65002
810	COL4A1--epithelial--CD47--epithelial	COL4A1	epithelial	CD47	epithelial	6	10	6	16	54.5455	76.9231	60	69.5652	0.65002
868	FGF7--epithelial--FGFR2--epithelial	FGF7	epithelial	FGFR2	epithelial	7	10	6	16	63.6364	76.9231	60	69.5652	0.65002
876	FGF7--myeloid--FGFR2--epithelial	FGF7	myeloid	FGFR2	epithelial	7	10	6	16	63.6364	76.9231	60	69.5652	0.65002
921	FBN1--endothelial--ITGB6--epithelial	FBN1	endothelial	ITGB6	epithelial	8	10	6	16	72.7273	76.9231	60	69.5652	0.65002
1009	SLPI--stromal--PLSCR1--endothelial	SLPI	stromal	PLSCR1	endothelial	9	10	6	16	81.8182	76.9231	60	69.5652	0.65002
1126	ICAM1--myeloid--EGFR--stromal	ICAM1	myeloid	EGFR	stromal	9	10	6	16	81.8182	76.9231	60	69.5652	0.65002
1259	C1QA--myeloid--CD93--lymphocyte	C1QA	myeloid	CD93	lymphocyte	8	10	6	16	72.7273	76.9231	60	69.5652	0.65002
1353	THBS2--stromal--CD36--epithelial	THBS2	stromal	CD36	epithelial	8	10	6	16	72.7273	76.9231	60	69.5652	0.65002
1354	C1QA--myeloid--CD93--stromal	C1QA	myeloid	CD93	stromal	7	10	6	16	63.6364	76.9231	60	69.5652	0.65002
1432	ALCAM--endothelial--CHL1--epithelial	ALCAM	endothelial	CHL1	epithelial	7	10	6	16	63.6364	76.9231	60	69.5652	0.65002
1456	ALCAM--lymphocyte--CHL1--epithelial	ALCAM	lymphocyte	CHL1	epithelial	8	10	6	16	72.7273	76.9231	60	69.5652	0.65002
1497	IL11--myeloid--IL6R--myeloid	IL11	myeloid	IL6R	myeloid	7	10	6	16	63.6364	76.9231	60	69.5652	0.65002
1505	FGF18--epithelial--FGFR1--stromal	FGF18	epithelial	FGFR1	stromal	10	10	6	16	90.9091	76.9231	60	69.5652	0.65002
1588	COL1A2--stromal--FLT4--myeloid	COL1A2	stromal	FLT4	myeloid	8	10	6	16	72.7273	76.9231	60	69.5652	0.65002
1610	GREM1--stromal--KDR--stromal	GREM1	stromal	KDR	stromal	9	10	6	16	81.8182	76.9231	60	69.5652	0.65002
1643	FBN1--lymphocyte--ITGB6--epithelial	FBN1	lymphocyte	ITGB6	epithelial	7	10	6	16	63.6364	76.9231	60	69.5652	0.65002
1744	B2M--stromal--LILRB1--myeloid	B2M	stromal	LILRB1	myeloid	4	10	6	16	36.3636	76.9231	60	69.5652	0.65002
1963	HSPG2--epithelial--ITGA2--epithelial	HSPG2	epithelial	ITGA2	epithelial	6	10	6	16	54.5455	76.9231	60	69.5652	0.65002
2040	VCAN--stromal--ITGA4--stromal	VCAN	stromal	ITGA4	stromal	6	10	6	16	54.5455	76.9231	60	69.5652	0.65002
2126	COL4A4--lymphocyte--CD44--myeloid	COL4A4	lymphocyte	CD44	myeloid	6	10	6	16	54.5455	76.9231	60	69.5652	0.65002
2320	FN1--stromal--TNFRSF11B--epithelial	FN1	stromal	TNFRSF11B	epithelial	8	10	6	16	72.7273	76.9231	60	69.5652	0.65002
2373	FN1--stromal--TNFRSF11B--myeloid	FN1	stromal	TNFRSF11B	myeloid	7	10	6	16	63.6364	76.9231	60	69.5652	0.65002
2402	HAS2--stromal--CD44--lymphocyte	HAS2	stromal	CD44	lymphocyte	9	10	6	16	81.8182	76.9231	60	69.5652	0.65002
2444	FN1--stromal--FLT4--epithelial	FN1	stromal	FLT4	epithelial	7	10	6	16	63.6364	76.9231	60	69.5652	0.65002
2553	HLA-A--myeloid--CD3G--lymphocyte	HLA-A	myeloid	CD3G	lymphocyte	10	10	6	16	90.9091	76.9231	60	69.5652	0.65002
3155	HSPG2--stromal--ITGA2--epithelial	HSPG2	stromal	ITGA2	epithelial	6	10	6	16	54.5455	76.9231	60	69.5652	0.65002
175	PDGFB--endothelial--PDGFRB--stromal	PDGFB	endothelial	PDGFRB	stromal	2	4	2	6	18.1818	30.7692	20	26.087	0.66002
410	PDGFB--myeloid--PDGFRB--stromal	PDGFB	myeloid	PDGFRB	stromal	2	4	2	6	18.1818	30.7692	20	26.087	0.66002
1283	ADAM12--stromal--SDC4--myeloid	ADAM12	stromal	SDC4	myeloid	5	4	2	6	45.4545	30.7692	20	26.087	0.66002
1539	ADAM28--epithelial--ITGA4--epithelial	ADAM28	epithelial	ITGA4	epithelial	2	4	2	6	18.1818	30.7692	20	26.087	0.66002
1549	TAC1--endothelial--FAP--stromal	TAC1	endothelial	FAP	stromal	1	4	2	6	9.09091	30.7692	20	26.087	0.66002
1573	NRG1--stromal--HLA-DPB1--endothelial	NRG1	stromal	HLA-DPB1	endothelial	0	4	2	6	0	30.7692	20	26.087	0.66002
1585	THBS1--lymphocyte--CD47--epithelial	THBS1	lymphocyte	CD47	epithelial	2	4	2	6	18.1818	30.7692	20	26.087	0.66002
1682	CDH1--myeloid--EGFR--stromal	CDH1	myeloid	EGFR	stromal	6	4	2	6	54.5455	30.7692	20	26.087	0.66002
1702	NRG1--endothelial--EGFR--stromal	NRG1	endothelial	EGFR	stromal	4	4	2	6	36.3636	30.7692	20	26.087	0.66002
1754	CDH1--lymphocyte--IGF1R--epithelial	CDH1	lymphocyte	IGF1R	epithelial	5	4	2	6	45.4545	30.7692	20	26.087	0.66002
1763	TNFSF10--lymphocyte--TNFRSF11B--endothelial	TNFSF10	lymphocyte	TNFRSF11B	endothelial	0	4	2	6	0	30.7692	20	26.087	0.66002
1780	ADM--myeloid--CALCRL--stromal	ADM	myeloid	CALCRL	stromal	5	4	2	6	45.4545	30.7692	20	26.087	0.66002
1843	ALCAM--myeloid--NRP1--lymphocyte	ALCAM	myeloid	NRP1	lymphocyte	4	4	2	6	36.3636	30.7692	20	26.087	0.66002
1874	FGF9--epithelial--FGFR1--myeloid	FGF9	epithelial	FGFR1	myeloid	1	4	2	6	9.09091	30.7692	20	26.087	0.66002
1885	CD14--stromal--TLR4--endothelial	CD14	stromal	TLR4	endothelial	1	4	2	6	9.09091	30.7692	20	26.087	0.66002
1924	IL6--lymphocyte--F3--stromal	IL6	lymphocyte	F3	stromal	2	4	2	6	18.1818	30.7692	20	26.087	0.66002
1925	HSPG2--epithelial--ITGA2--myeloid	HSPG2	epithelial	ITGA2	myeloid	2	4	2	6	18.1818	30.7692	20	26.087	0.66002
2028	VWF--epithelial--ITGA4--myeloid	VWF	epithelial	ITGA4	myeloid	0	4	2	6	0	30.7692	20	26.087	0.66002
2064	PRG4--endothelial--TLR4--endothelial	PRG4	endothelial	TLR4	endothelial	1	4	2	6	9.09091	30.7692	20	26.087	0.66002
2070	HGF--myeloid--CD44--lymphocyte	HGF	myeloid	CD44	lymphocyte	3	4	2	6	27.2727	30.7692	20	26.087	0.66002
2112	DCN--epithelial--EGFR--stromal	DCN	epithelial	EGFR	stromal	3	4	2	6	27.2727	30.7692	20	26.087	0.66002
2133	PLA2G2A--myeloid--ITGA5--endothelial	PLA2G2A	myeloid	ITGA5	endothelial	2	4	2	6	18.1818	30.7692	20	26.087	0.66002
2217	CCN1--stromal--ITGA5--epithelial	CCN1	stromal	ITGA5	epithelial	5	4	2	6	45.4545	30.7692	20	26.087	0.66002
2230	CXCL12--stromal--ACKR3--stromal	CXCL12	stromal	ACKR3	stromal	5	4	2	6	45.4545	30.7692	20	26.087	0.66002
2238	CCN2--myeloid--ITGA5--endothelial	CCN2	myeloid	ITGA5	endothelial	2	4	2	6	18.1818	30.7692	20	26.087	0.66002
2281	DEFB1--epithelial--CCR6--stromal	DEFB1	epithelial	CCR6	stromal	2	4	2	6	18.1818	30.7692	20	26.087	0.66002
2370	THBS1--lymphocyte--ITGA6--endothelial	THBS1	lymphocyte	ITGA6	endothelial	5	4	2	6	45.4545	30.7692	20	26.087	0.66002
2423	PTGS2--epithelial--CAV1--epithelial	PTGS2	epithelial	CAV1	epithelial	2	4	2	6	18.1818	30.7692	20	26.087	0.66002
2463	HSPA1A--myeloid--TLR4--stromal	HSPA1A	myeloid	TLR4	stromal	2	4	2	6	18.1818	30.7692	20	26.087	0.66002
2490	BMP2--lymphocyte--RGMB--epithelial	BMP2	lymphocyte	RGMB	epithelial	4	4	2	6	36.3636	30.7692	20	26.087	0.66002
2562	EDN1--endothelial--EDNRA--endothelial	EDN1	endothelial	EDNRA	endothelial	3	4	2	6	27.2727	30.7692	20	26.087	0.66002
2609	CD59--epithelial--STAB1--endothelial	CD59	epithelial	STAB1	endothelial	5	4	2	6	45.4545	30.7692	20	26.087	0.66002
2616	CXCL12--endothelial--SDC4--stromal	CXCL12	endothelial	SDC4	stromal	7	4	2	6	63.6364	30.7692	20	26.087	0.66002
2697	TGM2--endothelial--ITGA4--stromal	TGM2	endothelial	ITGA4	stromal	3	4	2	6	27.2727	30.7692	20	26.087	0.66002
2809	VEGFA--stromal--KDR--lymphocyte	VEGFA	stromal	KDR	lymphocyte	2	4	2	6	18.1818	30.7692	20	26.087	0.66002
2904	CCL11--stromal--ACKR1--stromal	CCL11	stromal	ACKR1	stromal	1	4	2	6	9.09091	30.7692	20	26.087	0.66002
2915	MYL9--stromal--CD69--stromal	MYL9	stromal	CD69	stromal	2	4	2	6	18.1818	30.7692	20	26.087	0.66002
2990	GZMA--epithelial--F2R--lymphocyte	GZMA	epithelial	F2R	lymphocyte	1	4	2	6	9.09091	30.7692	20	26.087	0.66002
3009	LAMA4--endothelial--CD44--epithelial	LAMA4	endothelial	CD44	epithelial	1	4	2	6	9.09091	30.7692	20	26.087	0.66002
3074	EFNA5--endothelial--EPHA7--myeloid	EFNA5	endothelial	EPHA7	myeloid	1	4	2	6	9.09091	30.7692	20	26.087	0.66002
3130	SEMA3A--stromal--NRP2--stromal	SEMA3A	stromal	NRP2	stromal	1	4	2	6	9.09091	30.7692	20	26.087	0.66002
3132	SPP1--endothelial--CD44--epithelial	SPP1	endothelial	CD44	epithelial	4	4	2	6	36.3636	30.7692	20	26.087	0.66002
3144	IGF1--endothelial--IGF1R--stromal	IGF1	endothelial	IGF1R	stromal	1	4	2	6	9.09091	30.7692	20	26.087	0.66002
3156	CSF3--endothelial--CSF3R--stromal	CSF3	endothelial	CSF3R	stromal	3	4	2	6	27.2727	30.7692	20	26.087	0.66002
3176	CSF3--endothelial--CSF1R--stromal	CSF3	endothelial	CSF1R	stromal	3	4	2	6	27.2727	30.7692	20	26.087	0.66002
3179	ADM--epithelial--ACKR3--myeloid	ADM	epithelial	ACKR3	myeloid	4	4	2	6	36.3636	30.7692	20	26.087	0.66002
3240	CSF3--endothelial--CSF2RA--stromal	CSF3	endothelial	CSF2RA	stromal	2	4	2	6	18.1818	30.7692	20	26.087	0.66002
3291	CXCL8--myeloid--KDR--epithelial	CXCL8	myeloid	KDR	epithelial	4	4	2	6	36.3636	30.7692	20	26.087	0.66002
3330	SPON2--myeloid--ITGA5--endothelial	SPON2	myeloid	ITGA5	endothelial	3	4	2	6	27.2727	30.7692	20	26.087	0.66002
3340	COL4A2--endothelial--CD44--epithelial	COL4A2	endothelial	CD44	epithelial	5	4	2	6	45.4545	30.7692	20	26.087	0.66002
3579	TNFSF10--stromal--TNFRSF11B--endothelial	TNFSF10	stromal	TNFRSF11B	endothelial	1	4	2	6	9.09091	30.7692	20	26.087	0.66002
3585	VWF--stromal--TNFRSF11B--endothelial	VWF	stromal	TNFRSF11B	endothelial	0	4	2	6	0	30.7692	20	26.087	0.66002
3626	B2M--endothelial--LILRB1--endothelial	B2M	endothelial	LILRB1	endothelial	3	4	2	6	27.2727	30.7692	20	26.087	0.66002
3824	LRPAP1--myeloid--LDLR--endothelial	LRPAP1	myeloid	LDLR	endothelial	4	4	2	6	36.3636	30.7692	20	26.087	0.66002
3830	GZMA--lymphocyte--F2R--myeloid	GZMA	lymphocyte	F2R	myeloid	3	4	2	6	27.2727	30.7692	20	26.087	0.66002
3833	FN1--stromal--ITGA6--myeloid	FN1	stromal	ITGA6	myeloid	3	4	2	6	27.2727	30.7692	20	26.087	0.66002
3954	IL1B--epithelial--IL1R2--epithelial	IL1B	epithelial	IL1R2	epithelial	1	4	2	6	9.09091	30.7692	20	26.087	0.66002
3956	PTGS2--epithelial--CAV1--lymphocyte	PTGS2	epithelial	CAV1	lymphocyte	4	4	2	6	36.3636	30.7692	20	26.087	0.66002
4082	EDN1--epithelial--EDNRA--myeloid	EDN1	epithelial	EDNRA	myeloid	2	4	2	6	18.1818	30.7692	20	26.087	0.66002
4084	EDN1--epithelial--EDNRA--lymphocyte	EDN1	epithelial	EDNRA	lymphocyte	2	4	2	6	18.1818	30.7692	20	26.087	0.66002
4168	HLA-A--endothelial--CD8A--endothelial	HLA-A	endothelial	CD8A	endothelial	4	4	2	6	36.3636	30.7692	20	26.087	0.66002
393	B2M--epithelial--KLRD1--lymphocyte	B2M	epithelial	KLRD1	lymphocyte	6	9	8	17	54.5455	69.2308	80	73.913	0.66002
627	SPON2--stromal--ITGA4--myeloid	SPON2	stromal	ITGA4	myeloid	7	9	8	17	63.6364	69.2308	80	73.913	0.66002
630	S100A4--myeloid--ERBB3--epithelial	S100A4	myeloid	ERBB3	epithelial	7	9	8	17	63.6364	69.2308	80	73.913	0.66002
675	NID1--lymphocyte--ITGA3--epithelial	NID1	lymphocyte	ITGA3	epithelial	9	9	8	17	81.8182	69.2308	80	73.913	0.66002
707	NID1--myeloid--ITGA3--epithelial	NID1	myeloid	ITGA3	epithelial	9	9	8	17	81.8182	69.2308	80	73.913	0.66002
808	TIMP2--lymphocyte--ITGA3--epithelial	TIMP2	lymphocyte	ITGA3	epithelial	9	9	8	17	81.8182	69.2308	80	73.913	0.66002
842	PLAU--lymphocyte--PLAUR--myeloid	PLAU	lymphocyte	PLAUR	myeloid	9	9	8	17	81.8182	69.2308	80	73.913	0.66002
861	ANXA1--myeloid--EGFR--stromal	ANXA1	myeloid	EGFR	stromal	10	9	8	17	90.9091	69.2308	80	73.913	0.66002
899	CXCL12--endothelial--ITGA5--endothelial	CXCL12	endothelial	ITGA5	endothelial	9	9	8	17	81.8182	69.2308	80	73.913	0.66002
952	COL1A2--endothelial--CD93--myeloid	COL1A2	endothelial	CD93	myeloid	5	9	8	17	45.4545	69.2308	80	73.913	0.66002
989	SEMA3A--endothelial--NRP2--stromal	SEMA3A	endothelial	NRP2	stromal	8	9	8	17	72.7273	69.2308	80	73.913	0.66002
1020	PGF--endothelial--NRP1--stromal	PGF	endothelial	NRP1	stromal	9	9	8	17	81.8182	69.2308	80	73.913	0.66002
1148	ICAM1--epithelial--CAV1--endothelial	ICAM1	epithelial	CAV1	endothelial	8	9	8	17	72.7273	69.2308	80	73.913	0.66002
1202	COL4A2--endothelial--CD44--stromal	COL4A2	endothelial	CD44	stromal	5	9	8	17	45.4545	69.2308	80	73.913	0.66002
1250	S100A10--epithelial--CFTR--epithelial	S100A10	epithelial	CFTR	epithelial	7	9	8	17	63.6364	69.2308	80	73.913	0.66002
1290	PTGS2--stromal--CAV1--endothelial	PTGS2	stromal	CAV1	endothelial	10	9	8	17	90.9091	69.2308	80	73.913	0.66002
1352	HLA-A--lymphocyte--CD8A--epithelial	HLA-A	lymphocyte	CD8A	epithelial	7	9	8	17	63.6364	69.2308	80	73.913	0.66002
1428	ADM--stromal--RAMP1--stromal	ADM	stromal	RAMP1	stromal	6	9	8	17	54.5455	69.2308	80	73.913	0.66002
1506	COL4A1--lymphocyte--CD93--myeloid	COL4A1	lymphocyte	CD93	myeloid	7	9	8	17	63.6364	69.2308	80	73.913	0.66002
1634	THBS1--epithelial--CD36--endothelial	THBS1	epithelial	CD36	endothelial	5	9	8	17	45.4545	69.2308	80	73.913	0.66002
1707	THBS1--stromal--ITGA4--myeloid	THBS1	stromal	ITGA4	myeloid	8	9	8	17	72.7273	69.2308	80	73.913	0.66002
1823	ANXA1--stromal--EGFR--stromal	ANXA1	stromal	EGFR	stromal	10	9	8	17	90.9091	69.2308	80	73.913	0.66002
2156	ADAM23--lymphocyte--ITGA4--stromal	ADAM23	lymphocyte	ITGA4	stromal	5	9	8	17	45.4545	69.2308	80	73.913	0.66002
2291	SPN--lymphocyte--SIGLEC1--stromal	SPN	lymphocyte	SIGLEC1	stromal	8	9	8	17	72.7273	69.2308	80	73.913	0.66002
2377	FN1--myeloid--FLT4--endothelial	FN1	myeloid	FLT4	endothelial	6	9	8	17	54.5455	69.2308	80	73.913	0.66002
2411	RSPO3--stromal--RNF43--epithelial	RSPO3	stromal	RNF43	epithelial	10	9	8	17	90.9091	69.2308	80	73.913	0.66002
2439	FN1--stromal--PLAUR--stromal	FN1	stromal	PLAUR	stromal	10	9	8	17	90.9091	69.2308	80	73.913	0.66002
2587	SPP1--epithelial--CD44--lymphocyte	SPP1	epithelial	CD44	lymphocyte	9	9	8	17	81.8182	69.2308	80	73.913	0.66002
2741	FN1--stromal--C5AR1--stromal	FN1	stromal	C5AR1	stromal	8	9	8	17	72.7273	69.2308	80	73.913	0.66002
3576	WNT7A--endothelial--LDLR--epithelial	WNT7A	endothelial	LDLR	epithelial	7	9	8	17	63.6364	69.2308	80	73.913	0.66002
611	LAMC2--epithelial--ITGA6--myeloid	LAMC2	epithelial	ITGA6	myeloid	6	6	3	9	54.5455	46.1538	30	39.1304	0.669269
1006	SPON2--stromal--ITGA5--myeloid	SPON2	stromal	ITGA5	myeloid	3	6	3	9	27.2727	46.1538	30	39.1304	0.669269
1174	CXCL12--endothelial--ITGA4--myeloid	CXCL12	endothelial	ITGA4	myeloid	7	6	3	9	63.6364	46.1538	30	39.1304	0.669269
1226	CXCL8--lymphocyte--KDR--endothelial	CXCL8	lymphocyte	KDR	endothelial	5	6	3	9	45.4545	46.1538	30	39.1304	0.669269
1280	PGF--myeloid--KDR--endothelial	PGF	myeloid	KDR	endothelial	3	6	3	9	27.2727	46.1538	30	39.1304	0.669269
1299	CXCL8--endothelial--KDR--endothelial	CXCL8	endothelial	KDR	endothelial	4	6	3	9	36.3636	46.1538	30	39.1304	0.669269
1360	EDN1--endothelial--EDNRA--epithelial	EDN1	endothelial	EDNRA	epithelial	5	6	3	9	45.4545	46.1538	30	39.1304	0.669269
1404	THBS2--endothelial--CD47--epithelial	THBS2	endothelial	CD47	epithelial	2	6	3	9	18.1818	46.1538	30	39.1304	0.669269
1414	PGF--endothelial--KDR--myeloid	PGF	endothelial	KDR	myeloid	7	6	3	9	63.6364	46.1538	30	39.1304	0.669269
1503	ADAM23--epithelial--ITGA5--endothelial	ADAM23	epithelial	ITGA5	endothelial	3	6	3	9	27.2727	46.1538	30	39.1304	0.669269
1574	FBN1--stromal--ITGA5--myeloid	FBN1	stromal	ITGA5	myeloid	3	6	3	9	27.2727	46.1538	30	39.1304	0.669269
1599	GREM1--lymphocyte--KDR--endothelial	GREM1	lymphocyte	KDR	endothelial	4	6	3	9	36.3636	46.1538	30	39.1304	0.669269
1605	CEACAM1--myeloid--EGFR--stromal	CEACAM1	myeloid	EGFR	stromal	6	6	3	9	54.5455	46.1538	30	39.1304	0.669269
1615	COL1A1--stromal--DDR2--myeloid	COL1A1	stromal	DDR2	myeloid	5	6	3	9	45.4545	46.1538	30	39.1304	0.669269
1626	HSP90AA1--endothelial--CFTR--stromal	HSP90AA1	endothelial	CFTR	stromal	1	6	3	9	9.09091	46.1538	30	39.1304	0.669269
1633	THBS2--lymphocyte--CD47--epithelial	THBS2	lymphocyte	CD47	epithelial	2	6	3	9	18.1818	46.1538	30	39.1304	0.669269
1640	EDN1--endothelial--EDNRA--lymphocyte	EDN1	endothelial	EDNRA	lymphocyte	4	6	3	9	36.3636	46.1538	30	39.1304	0.669269
1656	S100A8--stromal--TLR4--endothelial	S100A8	stromal	TLR4	endothelial	2	6	3	9	18.1818	46.1538	30	39.1304	0.669269
1675	S100A8--myeloid--TLR4--endothelial	S100A8	myeloid	TLR4	endothelial	4	6	3	9	36.3636	46.1538	30	39.1304	0.669269
1844	HSPG2--epithelial--ITGA2--lymphocyte	HSPG2	epithelial	ITGA2	lymphocyte	4	6	3	9	36.3636	46.1538	30	39.1304	0.669269
1864	CCN4--lymphocyte--ITGA5--endothelial	CCN4	lymphocyte	ITGA5	endothelial	3	6	3	9	27.2727	46.1538	30	39.1304	0.669269
1865	COL4A2--endothelial--CD93--lymphocyte	COL4A2	endothelial	CD93	lymphocyte	2	6	3	9	18.1818	46.1538	30	39.1304	0.669269
1932	EFNA5--endothelial--EPHA3--lymphocyte	EFNA5	endothelial	EPHA3	lymphocyte	0	6	3	9	0	46.1538	30	39.1304	0.669269
1937	CXCL8--epithelial--KDR--lymphocyte	CXCL8	epithelial	KDR	lymphocyte	3	6	3	9	27.2727	46.1538	30	39.1304	0.669269
2135	FBN1--lymphocyte--ITGA5--endothelial	FBN1	lymphocyte	ITGA5	endothelial	3	6	3	9	27.2727	46.1538	30	39.1304	0.669269
2196	CCN1--stromal--CAV1--lymphocyte	CCN1	stromal	CAV1	lymphocyte	6	6	3	9	54.5455	46.1538	30	39.1304	0.669269
2245	HSP90AA1--epithelial--EGFR--stromal	HSP90AA1	epithelial	EGFR	stromal	6	6	3	9	54.5455	46.1538	30	39.1304	0.669269
2326	BMP2--stromal--RGMB--epithelial	BMP2	stromal	RGMB	epithelial	5	6	3	9	45.4545	46.1538	30	39.1304	0.669269
2358	COL14A1--lymphocyte--CD44--myeloid	COL14A1	lymphocyte	CD44	myeloid	4	6	3	9	36.3636	46.1538	30	39.1304	0.669269
2408	ICAM1--stromal--SPN--myeloid	ICAM1	stromal	SPN	myeloid	2	6	3	9	18.1818	46.1538	30	39.1304	0.669269
2456	FN1--stromal--ITGA2--myeloid	FN1	stromal	ITGA2	myeloid	4	6	3	9	36.3636	46.1538	30	39.1304	0.669269
2567	HLA-A--endothelial--LILRB2--lymphocyte	HLA-A	endothelial	LILRB2	lymphocyte	5	6	3	9	45.4545	46.1538	30	39.1304	0.669269
2583	HLA-A--endothelial--LILRB2--stromal	HLA-A	endothelial	LILRB2	stromal	6	6	3	9	54.5455	46.1538	30	39.1304	0.669269
2603	HLA-A--endothelial--CD8A--stromal	HLA-A	endothelial	CD8A	stromal	6	6	3	9	54.5455	46.1538	30	39.1304	0.669269
2756	VEGFA--stromal--NRP2--stromal	VEGFA	stromal	NRP2	stromal	6	6	3	9	54.5455	46.1538	30	39.1304	0.669269
2758	LAMA3--endothelial--CD44--myeloid	LAMA3	endothelial	CD44	myeloid	5	6	3	9	45.4545	46.1538	30	39.1304	0.669269
2783	APOE--endothelial--ABCA1--myeloid	APOE	endothelial	ABCA1	myeloid	6	6	3	9	54.5455	46.1538	30	39.1304	0.669269
2803	HBEGF--lymphocyte--CD44--myeloid	HBEGF	lymphocyte	CD44	myeloid	5	6	3	9	45.4545	46.1538	30	39.1304	0.669269
2834	NCAM1--epithelial--FGFR1--stromal	NCAM1	epithelial	FGFR1	stromal	6	6	3	9	54.5455	46.1538	30	39.1304	0.669269
2921	ACE--stromal--BDKRB2--stromal	ACE	stromal	BDKRB2	stromal	6	6	3	9	54.5455	46.1538	30	39.1304	0.669269
2957	IGLC1--lymphocyte--FCGR2B--myeloid	IGLC1	lymphocyte	FCGR2B	myeloid	6	6	3	9	54.5455	46.1538	30	39.1304	0.669269
2961	ADAM28--lymphocyte--ITGA4--myeloid	ADAM28	lymphocyte	ITGA4	myeloid	2	6	3	9	18.1818	46.1538	30	39.1304	0.669269
2969	THBS2--lymphocyte--ITGA6--epithelial	THBS2	lymphocyte	ITGA6	epithelial	2	6	3	9	18.1818	46.1538	30	39.1304	0.669269
3021	ACE--lymphocyte--BDKRB2--endothelial	ACE	lymphocyte	BDKRB2	endothelial	5	6	3	9	45.4545	46.1538	30	39.1304	0.669269
3029	ADAM23--lymphocyte--ITGA4--endothelial	ADAM23	lymphocyte	ITGA4	endothelial	3	6	3	9	27.2727	46.1538	30	39.1304	0.669269
3114	CCL20--lymphocyte--CCR6--endothelial	CCL20	lymphocyte	CCR6	endothelial	3	6	3	9	27.2727	46.1538	30	39.1304	0.669269
3274	CXCL8--myeloid--ACKR1--lymphocyte	CXCL8	myeloid	ACKR1	lymphocyte	4	6	3	9	36.3636	46.1538	30	39.1304	0.669269
3654	PLTP--myeloid--ABCA1--stromal	PLTP	myeloid	ABCA1	stromal	5	6	3	9	45.4545	46.1538	30	39.1304	0.669269
3829	HSP90AA1--epithelial--CFTR--epithelial	HSP90AA1	epithelial	CFTR	epithelial	4	6	3	9	36.3636	46.1538	30	39.1304	0.669269
573	LAMC2--epithelial--ITGB4--lymphocyte	LAMC2	epithelial	ITGB4	lymphocyte	9	7	7	14	81.8182	53.8462	70	60.8696	0.669269
613	CXCL12--epithelial--ACKR3--endothelial	CXCL12	epithelial	ACKR3	endothelial	3	7	7	14	27.2727	53.8462	70	60.8696	0.669269
740	PDGFB--endothelial--PDGFRB--lymphocyte	PDGFB	endothelial	PDGFRB	lymphocyte	8	7	7	14	72.7273	53.8462	70	60.8696	0.669269
864	CD38--lymphocyte--PECAM1--stromal	CD38	lymphocyte	PECAM1	stromal	5	7	7	14	45.4545	53.8462	70	60.8696	0.669269
886	PLAU--endothelial--PLAUR--myeloid	PLAU	endothelial	PLAUR	myeloid	10	7	7	14	90.9091	53.8462	70	60.8696	0.669269
1431	CCN1--stromal--SDC4--endothelial	CCN1	stromal	SDC4	endothelial	4	7	7	14	36.3636	53.8462	70	60.8696	0.669269
1488	ALCAM--myeloid--CHL1--stromal	ALCAM	myeloid	CHL1	stromal	9	7	7	14	81.8182	53.8462	70	60.8696	0.669269
1519	COL1A1--lymphocyte--CD93--myeloid	COL1A1	lymphocyte	CD93	myeloid	7	7	7	14	63.6364	53.8462	70	60.8696	0.669269
1617	S100A10--lymphocyte--CFTR--epithelial	S100A10	lymphocyte	CFTR	epithelial	6	7	7	14	54.5455	53.8462	70	60.8696	0.669269
1759	CXCL12--epithelial--ITGA5--endothelial	CXCL12	epithelial	ITGA5	endothelial	4	7	7	14	36.3636	53.8462	70	60.8696	0.669269
1887	COL1A2--epithelial--CD36--endothelial	COL1A2	epithelial	CD36	endothelial	5	7	7	14	45.4545	53.8462	70	60.8696	0.669269
1890	ALCAM--lymphocyte--NRP1--endothelial	ALCAM	lymphocyte	NRP1	endothelial	6	7	7	14	54.5455	53.8462	70	60.8696	0.669269
2084	B2M--stromal--CD3G--lymphocyte	B2M	stromal	CD3G	lymphocyte	6	7	7	14	54.5455	53.8462	70	60.8696	0.669269
2675	PDGFB--epithelial--PDGFRA--stromal	PDGFB	epithelial	PDGFRA	stromal	7	7	7	14	63.6364	53.8462	70	60.8696	0.669269
524	CCL14--endothelial--ACKR1--epithelial	CCL14	endothelial	ACKR1	epithelial	8	6	6	12	72.7273	46.1538	60	52.1739	0.680172
945	APOE--stromal--LDLR--endothelial	APOE	stromal	LDLR	endothelial	7	6	6	12	63.6364	46.1538	60	52.1739	0.680172
1198	WNT5A--stromal--LDLR--endothelial	WNT5A	stromal	LDLR	endothelial	6	6	6	12	54.5455	46.1538	60	52.1739	0.680172
1678	COL4A2--myeloid--CD93--myeloid	COL4A2	myeloid	CD93	myeloid	6	6	6	12	54.5455	46.1538	60	52.1739	0.680172
1761	COL1A1--endothelial--CD93--myeloid	COL1A1	endothelial	CD93	myeloid	4	6	6	12	36.3636	46.1538	60	52.1739	0.680172
1947	BMP2--endothelial--RGMB--stromal	BMP2	endothelial	RGMB	stromal	3	6	6	12	27.2727	46.1538	60	52.1739	0.680172
2082	SPON2--lymphocyte--ITGA5--endothelial	SPON2	lymphocyte	ITGA5	endothelial	4	6	6	12	36.3636	46.1538	60	52.1739	0.680172
2117	TNF--lymphocyte--FLT4--stromal	TNF	lymphocyte	FLT4	stromal	7	6	6	12	63.6364	46.1538	60	52.1739	0.680172
2140	PTN--stromal--SDC4--stromal	PTN	stromal	SDC4	stromal	7	6	6	12	63.6364	46.1538	60	52.1739	0.680172
2246	SELE--myeloid--CD44--myeloid	SELE	myeloid	CD44	myeloid	7	6	6	12	63.6364	46.1538	60	52.1739	0.680172
2261	COL1A2--myeloid--CD36--endothelial	COL1A2	myeloid	CD36	endothelial	2	6	6	12	18.1818	46.1538	60	52.1739	0.680172
2305	PRG4--stromal--CD44--lymphocyte	PRG4	stromal	CD44	lymphocyte	9	6	6	12	81.8182	46.1538	60	52.1739	0.680172
2551	SPN--lymphocyte--SIGLEC1--endothelial	SPN	lymphocyte	SIGLEC1	endothelial	4	6	6	12	36.3636	46.1538	60	52.1739	0.680172
2731	IL15--epithelial--IL2RA--lymphocyte	IL15	epithelial	IL2RA	lymphocyte	3	6	6	12	27.2727	46.1538	60	52.1739	0.680172
3507	LAMA3--epithelial--ITGB4--stromal	LAMA3	epithelial	ITGB4	stromal	6	6	6	12	54.5455	46.1538	60	52.1739	0.680172
3632	SPN--lymphocyte--SIGLEC1--epithelial	SPN	lymphocyte	SIGLEC1	epithelial	3	6	6	12	27.2727	46.1538	60	52.1739	0.680172
3662	RPS19--lymphocyte--C5AR1--epithelial	RPS19	lymphocyte	C5AR1	epithelial	4	6	6	12	36.3636	46.1538	60	52.1739	0.680172
776	PLA2G2A--endothelial--ERBB3--epithelial	PLA2G2A	endothelial	ERBB3	epithelial	5	7	4	11	45.4545	53.8462	40	47.8261	0.680172
947	EFNB2--stromal--PECAM1--myeloid	EFNB2	stromal	PECAM1	myeloid	5	7	4	11	45.4545	53.8462	40	47.8261	0.680172
968	TNFSF10--epithelial--CCR6--myeloid	TNFSF10	epithelial	CCR6	myeloid	4	7	4	11	36.3636	53.8462	40	47.8261	0.680172
1007	PGF--lymphocyte--NRP1--myeloid	PGF	lymphocyte	NRP1	myeloid	2	7	4	11	18.1818	53.8462	40	47.8261	0.680172
1112	ANGPTL4--myeloid--CDH11--stromal	ANGPTL4	myeloid	CDH11	stromal	8	7	4	11	72.7273	53.8462	40	47.8261	0.680172
1118	SLPI--endothelial--PLSCR1--endothelial	SLPI	endothelial	PLSCR1	endothelial	9	7	4	11	81.8182	53.8462	40	47.8261	0.680172
1327	COL3A1--stromal--DDR2--epithelial	COL3A1	stromal	DDR2	epithelial	5	7	4	11	45.4545	53.8462	40	47.8261	0.680172
1397	HSP90AA1--endothelial--CFTR--endothelial	HSP90AA1	endothelial	CFTR	endothelial	1	7	4	11	9.09091	53.8462	40	47.8261	0.680172
1407	TNF--lymphocyte--TNFRSF1B--endothelial	TNF	lymphocyte	TNFRSF1B	endothelial	6	7	4	11	54.5455	53.8462	40	47.8261	0.680172
1427	SEMA3A--endothelial--NRP2--lymphocyte	SEMA3A	endothelial	NRP2	lymphocyte	3	7	4	11	27.2727	53.8462	40	47.8261	0.680172
1435	SERPINE1--lymphocyte--PLAUR--myeloid	SERPINE1	lymphocyte	PLAUR	myeloid	7	7	4	11	63.6364	53.8462	40	47.8261	0.680172
1520	EFNB2--endothelial--EPHA3--epithelial	EFNB2	endothelial	EPHA3	epithelial	10	7	4	11	90.9091	53.8462	40	47.8261	0.680172
1544	PLAU--stromal--ITGA5--endothelial	PLAU	stromal	ITGA5	endothelial	5	7	4	11	45.4545	53.8462	40	47.8261	0.680172
1596	NRG1--lymphocyte--EGFR--stromal	NRG1	lymphocyte	EGFR	stromal	5	7	4	11	45.4545	53.8462	40	47.8261	0.680172
1649	HSPA1A--myeloid--TLR4--endothelial	HSPA1A	myeloid	TLR4	endothelial	5	7	4	11	45.4545	53.8462	40	47.8261	0.680172
1659	PGF--endothelial--NRP1--epithelial	PGF	endothelial	NRP1	epithelial	7	7	4	11	63.6364	53.8462	40	47.8261	0.680172
1673	CCN4--epithelial--ITGA5--endothelial	CCN4	epithelial	ITGA5	endothelial	2	7	4	11	18.1818	53.8462	40	47.8261	0.680172
1697	PTN--epithelial--SDC4--epithelial	PTN	epithelial	SDC4	epithelial	4	7	4	11	36.3636	53.8462	40	47.8261	0.680172
1724	SPP1--endothelial--S1PR1--stromal	SPP1	endothelial	S1PR1	stromal	3	7	4	11	27.2727	53.8462	40	47.8261	0.680172
1818	VCAN--stromal--TLR2--lymphocyte	VCAN	stromal	TLR2	lymphocyte	4	7	4	11	36.3636	53.8462	40	47.8261	0.680172
1829	HGF--lymphocyte--NRP1--endothelial	HGF	lymphocyte	NRP1	endothelial	6	7	4	11	54.5455	53.8462	40	47.8261	0.680172
1836	HSPA8--myeloid--LDLR--endothelial	HSPA8	myeloid	LDLR	endothelial	4	7	4	11	36.3636	53.8462	40	47.8261	0.680172
1837	CXCL8--epithelial--ACKR1--lymphocyte	CXCL8	epithelial	ACKR1	lymphocyte	3	7	4	11	27.2727	53.8462	40	47.8261	0.680172
1877	CXCL8--epithelial--ACKR1--stromal	CXCL8	epithelial	ACKR1	stromal	4	7	4	11	36.3636	53.8462	40	47.8261	0.680172
1981	ICAM1--lymphocyte--EGFR--stromal	ICAM1	lymphocyte	EGFR	stromal	7	7	4	11	63.6364	53.8462	40	47.8261	0.680172
1984	CXCL12--myeloid--CXCR4--myeloid	CXCL12	myeloid	CXCR4	myeloid	3	7	4	11	27.2727	53.8462	40	47.8261	0.680172
1991	CXCL12--myeloid--ITGA5--endothelial	CXCL12	myeloid	ITGA5	endothelial	4	7	4	11	36.3636	53.8462	40	47.8261	0.680172
2108	LAMB1--stromal--ITGA1--lymphocyte	LAMB1	stromal	ITGA1	lymphocyte	5	7	4	11	45.4545	53.8462	40	47.8261	0.680172
2122	CCN1--lymphocyte--CAV1--endothelial	CCN1	lymphocyte	CAV1	endothelial	5	7	4	11	45.4545	53.8462	40	47.8261	0.680172
[truncated: 2,710 more rows]
