# Supplementary material for: Dienogest interrupts the chemokine signalling axis in endometriotic lesions with resistant signatures providing novel opportunities for personalised treatment.
Source: Research Square preprint supplement (doi:10.21203/rs.3.rs-8096027/v1), 2026-01-13
Supplement: Supplementary file 9 [file dce587abd82e49950153ca08.xlsx]

## Sheet: Sheet1
Supplementary Table 1: Patient details of lesions used in study
Patient	Sample	Visanne	Responding	Year biopsy taken	Age	BMI	Lesion location
1	490K1	YES	NO	2015	38	20.8	nodule rectovaginal septum
2	FF805	YES	NO	2019	27	29.8	endometriosis rectal nodule
3	FF370	YES	NO	2019	30	27.5	nodule rectovaginal septum
4	FB282	YES	NO	2017	28	24.1	deep endometriosis lesion of the Appendix
5	FF972	YES	NO	2019	44	42.6	endometriosis rectal nodule
6	504K1	YES	NO	2013	23	30.1	nodule rectovaginal septum
7	FF848	YES	NO	2019	37	32.9	endometriosis rectal nodule
8	FB0660	YES	NO	2016	34	19.5	nodule rectovaginal septum
9	FB899	YES	NO	2016	42	26.6	endometriosis rectal nodule
10	085K1	YES	NO	2011	34	25.2	deep endometriosis lesion of the Appendix
11	FB123	NO	X	2016	35	22.1	nodule rectovaginal septum
11	FB308	NO	X	2016	35	22.1	nodule rectovaginal septum
12	FB881	NO	X	2016	30	29.4	nodule rectovaginal septum
12	FB908	NO	X	2016	30	29.4	nodule rectovaginal septum
13	FB368	NO	X	2016	30	22.8	nodule rectovaginal septum
14	FB0738	NO	X	2016	34	19	nodule rectovaginal septum
15	FF451	NO	X	2019	37	25	nodule Lig. Sacrouterinum
16	O74	NO	X	2016	33	16.9	nodule rectovaginal septum
17	FF406	NO	X	2019	40	27.6	endometriosis rectal nodule
18	FB434	NO	X	2016	35	18.6	nodule rectovaginal septum
19	FF314	NO	X	2019	28	21.3	nodule of the pelvic side wall
20	791K1	YES	YES	2012	33	18.9	nodule rectovaginal septum
21	660K1	YES	YES	2014	34	20	nodule rectovaginal septum
21	661K1	YES	YES	2014	34	20	nodule rectovaginal septum
22	871K1	YES	YES	2014	25	21.3	endometriosis rectal nodule
23	261K1	YES	YES	2013	38	24	nodule rectovaginal septum
24	674K1	YES	YES	2015	32	20.4	nodule rectovaginal septum
25	FB853	YES	YES	2016	25	22	nodule rectovaginal septum
26	FF620	YES	YES	2017	25	23	nodule rectovaginal septum
27	807K1	YES	YES	2014	40	20.7	endometriosis rectal nodule
28	803K1	YES	YES	2014	34	22.3	nodule rectovaginal septum
29	FB179	YES	YES	2016	32	29.3	nodule rectovaginal septum
30	059K1	YES	YES	2015	48	29	nodule rectovaginal septum
31	3791K1	YES	YES	2012	33	18.9	nodule rectovaginal septum
