# Supplementary material for: Dienogest interrupts the chemokine signalling axis in endometriotic lesions with resistant signatures providing novel opportunities for personalised treatment.
Source: Research Square preprint supplement (doi:10.21203/rs.3.rs-8096027/v1), 2026-01-13
Supplement: Supplementary file 10 [file e8c6aa96b2df7120f5f711e9.xlsx]

## Sheet: Sheet1
Supplementary Table 3: DEG between treated and non-treated in stromal cells
gene_ID	p_val	avg_log2FC	pct.1	pct.2	p_val_adj	mean_response_TRUE	mean_response_FALSE
PLCG2	2.8081e-152	-0.746159	0.675	0.766	7.84583e-148	4.48463	3.96743
COL8A1	4.1853e-102	-0.919949	0.086	0.203	1.16937e-97	1.28115	0.643486
LTBP4	5.08611e-102	0.838089	0.29	0.139	1.42106e-97	0.869776	1.45069
CRISPLD2	3.0008e-76	-0.55768	0.487	0.61	8.38422e-72	2.78884	2.40228
NOVA1	3.44458e-72	0.689636	0.262	0.138	9.62416e-68	0.96816	1.44618
FOS	6.74535e-70	0.719743	0.579	0.473	1.88465e-65	2.46775	2.96664
FKBP5	5.62223e-69	-0.574048	0.183	0.306	1.57085e-64	1.66594	1.26804
SLC19A2	2.28099e-68	-0.719111	0.095	0.192	6.37309e-64	1.21116	0.712705
ZFAND5	4.75906e-63	-0.804076	0.275	0.387	1.32968e-58	2.04293	1.48559
KLF9	2.51456e-60	-0.590349	0.158	0.264	7.02568e-56	1.39163	0.98243
PDLIM3	6.8478e-55	-0.722921	0.24	0.352	1.91328e-50	2.24549	1.7444
TSC22D3	1.6396e-54	-0.676631	0.16	0.261	4.58103e-50	1.5898	1.12079
PDLIM5	7.81568e-49	-0.497071	0.17	0.268	2.1837e-44	1.42453	1.07999
PTGIS	2.15832e-48	-0.503473	0.084	0.16	6.03035e-44	0.962615	0.613635
C3	1.79962e-47	-0.587886	0.16	0.254	5.02813e-43	1.5285	1.12101
INHBA	3.65325e-46	-0.990285	0.083	0.156	1.02072e-41	1.44853	0.762112
AL627171.2	1.06956e-45	-0.59615	0.101	0.179	2.98835e-41	1.08818	0.674963
KLF6	1.3282e-45	-0.581647	0.355	0.457	3.711e-41	2.33222	1.92905
FOXO3	9.25234e-44	-0.50205	0.17	0.261	2.5851e-39	1.42171	1.07372
SLC39A14	2.9668e-43	-0.53752	0.055	0.117	8.28925e-39	0.790084	0.417504
ZBTB16	3.67404e-42	-0.318876	0.392	0.506	1.02653e-37	2.37777	2.15675
PRRT2	2.59339e-40	0.552509	0.199	0.117	7.24593e-36	0.799717	1.18269
PDK4	2.43988e-38	-0.512198	0.091	0.161	6.81703e-34	1.26202	0.906992
PLXDC2	3.86145e-38	-0.437848	0.191	0.28	1.07889e-33	1.45982	1.15632
IL1R1	1.60257e-37	-0.556461	0.226	0.313	4.47758e-33	1.68487	1.29916
NNMT	1.73455e-37	-0.459901	0.15	0.232	4.84632e-33	1.36252	1.04374
ELL2	8.10979e-37	-0.567964	0.213	0.298	2.26588e-32	1.783	1.38932
GAS1	1.09977e-35	-0.511244	0.073	0.133	3.07275e-31	0.864183	0.509815
ATP1B3	2.31273e-35	-0.681055	0.153	0.228	6.46175e-31	1.62818	1.15611
ADAM33	2.3461e-35	0.465491	0.355	0.263	6.55501e-31	1.40886	1.73152
LEPR	2.53395e-35	-0.508588	0.094	0.16	7.07985e-31	1.11978	0.767258
ERRFI1	1.03041e-34	-0.72979	0.137	0.208	2.87896e-30	1.44785	0.941998
CD44	8.18015e-34	0.486391	0.313	0.221	2.28553e-29	1.3873	1.72444
MEDAG	4.05556e-32	-0.481669	0.065	0.119	1.13312e-27	0.88885	0.554983
PAPPA	4.37264e-32	0.597871	0.195	0.121	1.22172e-27	1.12628	1.54069
LINC02802	3.8067e-30	0.4293	0.109	0.055	1.06359e-25	0.416035	0.713604
PHLDA1	4.0899e-30	-0.506568	0.076	0.131	1.14272e-25	0.923826	0.572699
THBS2	4.68241e-30	-0.592836	0.261	0.336	1.30826e-25	1.9992	1.58828
PER3	5.74617e-30	0.41516	0.146	0.083	1.60548e-25	0.625596	0.913362
MAPK10	1.32471e-29	0.350067	0.291	0.206	3.70125e-25	1.20304	1.44569
RUNX1	8.92203e-29	-0.44247	0.117	0.181	2.49281e-24	1.1038	0.797102
MT-ND4	2.75011e-28	-0.230886	0.721	0.787	7.68381e-24	3.55225	3.39221
TNFAIP3	5.43195e-28	-0.703218	0.122	0.184	1.51769e-23	1.47024	0.98281
MARCKS	1.9428e-27	-0.428032	0.114	0.175	5.42819e-23	1.00729	0.710602
SQSTM1	2.0955e-27	0.484561	0.224	0.153	5.85484e-23	0.974588	1.31046
SKIL	2.11767e-27	-0.441765	0.245	0.32	5.91678e-23	1.67287	1.36666
GSTM2	2.27028e-27	0.40828	0.16	0.097	6.34317e-23	0.642125	0.925123
COL16A1	3.08386e-27	-0.416279	0.206	0.279	8.61631e-23	1.56224	1.2737
CEBPB	4.2044e-27	-0.597128	0.186	0.25	1.17471e-22	1.52074	1.10685
MT-ND3	1.83467e-26	-0.254676	0.711	0.775	5.12606e-22	3.63201	3.45548
FGFR1	2.37835e-26	-0.380443	0.281	0.357	6.64511e-22	1.81145	1.54775
MT-ND2	2.72207e-26	-0.210779	0.64	0.711	7.60548e-22	3.1751	3.029
JADE1	2.95402e-26	-0.408398	0.076	0.128	8.25353e-22	0.874673	0.591593
COL6A3	1.52769e-25	-0.271077	0.538	0.614	4.26836e-21	2.63893	2.45103
PLAGL1	5.18886e-25	0.313378	0.308	0.229	1.44977e-20	1.32458	1.5418
SERPINE1	5.74189e-25	-0.617158	0.175	0.241	1.60428e-20	1.98927	1.56149
JUN	1.38642e-24	0.421322	0.374	0.299	3.87364e-20	1.75161	2.04365
FBXO32	2.68498e-24	-0.561285	0.113	0.168	7.50184e-20	1.26315	0.8741
ZFP36L1	2.74619e-24	-0.472346	0.435	0.502	7.67286e-20	2.41469	2.08728
GOLGA8B	3.36002e-24	0.395972	0.264	0.193	9.38791e-20	1.11377	1.38823
GNLY	3.40095e-24	0.420786	0.147	0.09	9.50225e-20	0.721446	1.01311
DDX5	3.49468e-24	0.248489	0.746	0.708	9.76413e-20	2.70212	2.87436
LMCD1	7.92722e-24	-0.376797	0.171	0.237	2.21486e-19	1.81757	1.55639
AR	1.19424e-23	0.428029	0.174	0.114	3.3367e-19	0.73491	1.0316
DAAM1	6.25024e-23	0.406328	0.271	0.203	1.74632e-18	1.20795	1.48959
SEMA3C	6.6019e-23	-0.376874	0.082	0.13	1.84457e-18	0.83276	0.57153
INTS6	1.29496e-22	-0.375348	0.203	0.268	3.61811e-18	1.40567	1.1455
TACC1	1.76537e-22	-0.399674	0.384	0.448	4.93245e-18	2.16047	1.88344
TXNIP	2.12541e-22	-0.37785	0.249	0.317	5.93839e-18	1.69321	1.4313
UPF3A	3.30163e-22	0.347498	0.171	0.113	9.22474e-18	0.722982	0.963849
HSPH1	5.40572e-22	-0.430213	0.224	0.291	1.51036e-17	1.95361	1.65541
KANSL1	9.52497e-22	0.35597	0.339	0.269	2.66128e-17	1.34686	1.5936
CFD	2.24677e-21	0.369952	0.105	0.06	6.27747e-17	0.508317	0.764748
MED13L	3.19272e-21	-0.274426	0.311	0.38	8.92046e-17	1.72139	1.53117
ITGA1	6.47952e-21	-0.306228	0.213	0.279	1.81038e-16	1.55041	1.33815
CCDC144A	8.66537e-21	0.333927	0.323	0.253	2.4211e-16	1.39154	1.623
MT2A	1.04856e-20	-0.33839	0.2	0.264	2.92968e-16	1.77	1.53545
SPON1	1.06865e-20	-0.317602	0.127	0.181	2.9858e-16	0.973843	0.753698
TGM2	1.52837e-20	0.440435	0.173	0.118	4.27026e-16	1.01044	1.31573
LUM	3.1306e-20	-0.423935	0.277	0.342	8.7469e-16	1.93248	1.63863
NFASC	3.38605e-20	0.441267	0.115	0.07	9.46062e-16	0.607209	0.913072
MTRNR2L8	8.06816e-20	-0.451759	0.151	0.208	2.25425e-15	1.33383	1.02069
ZSCAN18	8.62933e-20	0.359526	0.163	0.109	2.41103e-15	0.703787	0.952991
IRAK3	8.73926e-20	-0.298391	0.096	0.145	2.44175e-15	0.895851	0.689022
XIST	1.1979e-19	-0.16663	0.929	0.945	3.34693e-15	3.95679	3.84129
ARGLU1	1.81551e-19	0.185521	0.747	0.717	5.07254e-15	2.65846	2.78705
GOLGA4	1.86136e-19	-0.291301	0.388	0.45	5.20065e-15	2.00896	1.80705
WSB1	2.42421e-19	0.232537	0.7	0.662	6.77324e-15	2.53911	2.7003
TTC3	4.53564e-19	-0.288709	0.404	0.469	1.26726e-14	2.04943	1.84932
TUBA1A	4.83254e-19	0.855729	0.204	0.15	1.35021e-14	0.983972	1.57712
ITGB8	7.38965e-19	0.420012	0.224	0.166	2.06467e-14	1.13475	1.42588
PAGR1	7.41873e-19	0.362664	0.115	0.071	2.07279e-14	0.51092	0.762299
ANK2	7.87236e-19	0.390969	0.327	0.261	2.19954e-14	1.74407	2.01507
MT-ND1	9.05968e-19	-0.162708	0.598	0.665	2.53127e-14	2.96505	2.85226
RND3	9.98156e-19	0.450798	0.24	0.181	2.78885e-14	1.23516	1.54763
TSHZ2	1.34923e-18	-0.294305	0.321	0.383	3.76976e-14	1.85361	1.64962
UAP1	1.35735e-18	-0.362942	0.112	0.161	3.79244e-14	1.07416	0.822587
COL27A1	1.59797e-18	0.422001	0.174	0.122	4.46473e-14	0.854374	1.14688
VEGFA	1.75054e-18	-0.421138	0.219	0.277	4.89101e-14	1.59497	1.30306
RGS2	3.15828e-18	-0.324395	0.104	0.152	8.82422e-14	1.06423	0.839374
PRELP	4.04667e-18	-0.348887	0.083	0.125	1.13064e-13	0.835005	0.593175
PLPP3	4.62134e-18	0.352756	0.174	0.121	1.2912e-13	0.803841	1.04835
GLUL	4.85683e-18	-0.502647	0.162	0.214	1.357e-13	1.42204	1.07363
NR4A1	5.92575e-18	0.479554	0.526	0.479	1.65565e-13	2.637	2.9694
GLIS3	9.54714e-18	-0.374799	0.132	0.181	2.66747e-13	1.18945	0.929655
RORB	1.93465e-17	0.413743	0.162	0.113	5.40542e-13	0.852866	1.13965
MAML2	2.14524e-17	0.298218	0.193	0.138	5.99379e-13	0.884659	1.09137
MICU3	3.53696e-17	0.288437	0.136	0.09	9.88225e-13	0.602041	0.80197
CD81	3.57902e-17	0.346524	0.18	0.129	9.99977e-13	0.747896	0.988089
SOCS3	3.75773e-17	0.327025	0.178	0.126	1.04991e-12	0.870407	1.09708
ITGAV	3.92055e-17	-0.306539	0.176	0.229	1.0954e-12	1.24305	1.03058
LAMA2	5.59249e-17	0.334759	0.245	0.187	1.56254e-12	1.15849	1.39052
ABL2	1.08466e-16	-0.398604	0.256	0.315	3.03054e-12	1.92335	1.64706
TMEM259	1.35862e-16	0.320051	0.205	0.151	3.79598e-12	0.909632	1.13147
PTPRA	1.92516e-16	0.286437	0.231	0.174	5.37889e-12	1.00699	1.20553
TBC1D2B	2.05601e-16	0.320831	0.139	0.094	5.7445e-12	0.59096	0.813343
MSI2	2.85276e-16	-0.370034	0.132	0.178	7.9706e-12	1.0895	0.833011
VMP1	3.79303e-16	-0.264778	0.624	0.67	1.05977e-11	2.91726	2.73373
B4GALT1	5.69589e-16	-0.248431	0.081	0.121	1.59143e-11	0.747458	0.575259
TAGLN	6.44641e-16	-0.133203	0.264	0.331	1.80113e-11	1.81043	1.7181
IGKC	6.96658e-16	-0.269707	0.1	0.144	1.94646e-11	0.988349	0.801403
NFIX	6.96757e-16	-0.283149	0.118	0.163	1.94674e-11	0.978858	0.782595
ABCA8	7.93494e-16	0.347551	0.244	0.188	2.21702e-11	1.21547	1.45637
GRAMD2B	1.15066e-15	0.317328	0.148	0.102	3.21494e-11	0.680276	0.90023
DCN	1.31954e-15	-0.225589	0.458	0.521	3.6868e-11	2.40295	2.24658
SRSF7	1.32599e-15	0.280529	0.269	0.211	3.70481e-11	1.16154	1.35599
HGSNAT	3.71718e-15	0.303066	0.201	0.15	1.03858e-10	0.884787	1.09486
MIR222HG	3.74864e-15	-0.354343	0.077	0.114	1.04737e-10	0.834407	0.588795
TCF25	4.35568e-15	0.2478	0.566	0.518	1.21698e-10	2.10628	2.27804
TANC2	4.81693e-15	-0.264786	0.072	0.109	1.34585e-10	0.698749	0.515213
PTPRG	4.88664e-15	-0.24868	0.137	0.184	1.36533e-10	1.04525	0.872882
SSR3	5.62423e-15	-0.315931	0.087	0.125	1.57141e-10	0.744208	0.525221
CHORDC1	6.55297e-15	-0.328444	0.159	0.206	1.8309e-10	1.16484	0.937181
AEBP1	8.30034e-15	-0.301687	0.257	0.309	2.31911e-10	1.58087	1.37176
PLEKHA5	8.9779e-15	0.272563	0.292	0.232	2.50842e-10	1.30437	1.4933
ALDH1A2	9.01897e-15	0.262813	0.103	0.065	2.5199e-10	0.486141	0.668309
RNF144A	9.84914e-15	-0.234157	0.086	0.125	2.75185e-10	0.723292	0.560986
CPQ	9.91577e-15	0.304999	0.171	0.125	2.77047e-10	0.766792	0.978201
ITSN1	1.43899e-14	-0.269078	0.12	0.164	4.02054e-10	0.987258	0.800747
SFRP2	2.53029e-14	-0.351589	0.191	0.243	7.06963e-10	1.57656	1.33285
MEIS2	2.92701e-14	-0.268191	0.181	0.23	8.17807e-10	1.26981	1.08391
LMNA	3.31557e-14	0.505392	0.473	0.43	9.26371e-10	2.2658	2.61611
EBF1	3.76336e-14	0.291984	0.138	0.097	1.05148e-09	0.653862	0.85625
NUDT4	5.43667e-14	-0.314811	0.073	0.108	1.51901e-09	0.769303	0.551093
ID4	6.51829e-14	-0.284909	0.152	0.198	1.82121e-09	1.15675	0.95927
MT-CO1	6.71424e-14	0.325888	0.798	0.792	1.87596e-09	3.69808	3.92397
SNHG5	1.00824e-13	-0.260054	0.143	0.187	2.81702e-09	1.06108	0.880826
RPL13A	1.01351e-13	-0.230636	0.224	0.277	2.83174e-09	1.45661	1.29674
NR2F1	1.12807e-13	0.446754	0.212	0.167	3.15182e-09	1.02226	1.33193
R3HDM2	1.28679e-13	0.288037	0.186	0.139	3.59528e-09	0.840299	1.03995
CALU	1.52333e-13	-0.29356	0.156	0.201	4.25618e-09	1.11473	0.91125
ZBTB21	1.60935e-13	-0.24083	0.094	0.132	4.49653e-09	0.814794	0.647864
ATF3	1.63997e-13	0.469129	0.159	0.117	4.58207e-09	0.898292	1.22347
FBN1	1.96752e-13	0.290184	0.266	0.215	5.49726e-09	1.20282	1.40396
KLF7	1.97812e-13	-0.229027	0.091	0.128	5.52686e-09	0.784565	0.625816
HSPB1	2.19529e-13	-0.118596	0.183	0.234	6.13364e-09	1.58083	1.49863
SF1	3.30992e-13	0.218972	0.437	0.383	9.24792e-09	1.69887	1.85065
SEMA5A	4.71439e-13	0.307782	0.114	0.078	1.3172e-08	0.565258	0.778597
COL6A1	5.31367e-13	0.140487	0.545	0.483	1.48464e-08	2.23533	2.3327
COL4A5	6.77186e-13	0.307282	0.107	0.072	1.89206e-08	0.486944	0.699935
EEF1A1	8.19897e-13	-0.166962	0.376	0.437	2.29079e-08	2.03341	1.91768
FAM118A	8.23166e-13	0.302109	0.215	0.169	2.29993e-08	1.03694	1.24634
RANBP2	8.51053e-13	-0.333145	0.166	0.209	2.37784e-08	1.21249	0.981576
PLEKHH2	8.69194e-13	0.371715	0.416	0.373	2.42853e-08	1.83492	2.09257
MYLK	8.78398e-13	-0.229197	0.111	0.152	2.45424e-08	1.0295	0.870634
SLMAP	8.82594e-13	-0.482504	0.153	0.194	2.46597e-08	1.4299	1.09545
ENPP1	9.29771e-13	0.281052	0.136	0.096	2.59778e-08	0.701001	0.895811
ALDH3A2	9.64628e-13	0.3166	0.105	0.07	2.69517e-08	0.491813	0.711263
RPS6	9.75572e-13	-0.217318	0.177	0.225	2.72575e-08	1.26167	1.11103
ADAMTS9-AS2	9.8965e-13	0.285889	0.157	0.115	2.76508e-08	0.746481	0.944644
NUTM2A-AS1	1.12902e-12	0.262695	0.23	0.181	3.15447e-08	1.01495	1.19703
DGKH	1.22967e-12	-0.253632	0.164	0.209	3.43568e-08	1.15706	0.981251
LDLR	1.32481e-12	0.287232	0.17	0.127	3.70152e-08	0.871126	1.07022
REL	1.62332e-12	-0.31561	0.151	0.194	4.53555e-08	1.19288	0.974119
ARID5B	2.07306e-12	-0.278719	0.349	0.396	5.79214e-08	1.90758	1.71438
GREM1	2.11803e-12	0.191498	0.107	0.073	5.91777e-08	0.97795	1.11069
COL7A1	2.37638e-12	0.321415	0.124	0.087	6.6396e-08	0.715004	0.937792
SYNPO2	2.61886e-12	-0.340608	0.275	0.321	7.31711e-08	1.88766	1.65157
HLA-E	2.62546e-12	0.29104	0.206	0.16	7.33554e-08	0.969254	1.17099
IFI16	2.65287e-12	0.199742	0.213	0.165	7.41212e-08	1.03961	1.17806
SPON2	3.62605e-12	0.281438	0.195	0.151	1.01312e-07	1.01836	1.21344
RPL13	3.64932e-12	-0.193826	0.329	0.384	1.01962e-07	1.86517	1.73082
AFF1	3.77474e-12	-0.20618	0.186	0.233	1.05466e-07	1.20507	1.06216
MYH10	3.85595e-12	-0.25547	0.102	0.139	1.07735e-07	0.884151	0.707073
ADD3	3.96479e-12	0.302236	0.216	0.171	1.10776e-07	1.00607	1.21556
ZBTB38	4.29216e-12	-0.233313	0.198	0.245	1.19923e-07	1.29176	1.13004
DMD	4.55272e-12	-0.127712	0.157	0.204	1.27203e-07	1.3827	1.29418
RPL7	6.08149e-12	-0.268088	0.132	0.171	1.69917e-07	0.977535	0.791711
KDM6B	6.84114e-12	-0.308937	0.194	0.238	1.91141e-07	1.54851	1.33437
PLSCR4	6.86678e-12	-0.238777	0.078	0.111	1.91858e-07	0.69988	0.534373
TAF1D	8.52848e-12	-0.22329	0.399	0.449	2.38286e-07	1.95175	1.79698
ESYT2	9.28035e-12	-0.282818	0.151	0.193	2.59293e-07	1.13541	0.939373
AC145124.1	9.42078e-12	0.230438	0.103	0.069	2.63217e-07	0.50566	0.665388
THBS1	1.04775e-11	-0.276303	0.458	0.504	2.92741e-07	2.70976	2.51824
PALM2-AKAP2	1.06279e-11	-0.263105	0.081	0.114	2.96944e-07	0.773718	0.591347
AC005261.1	1.08331e-11	-0.338015	0.11	0.147	3.02676e-07	0.946263	0.711969
ITPR1	1.15768e-11	0.252402	0.148	0.11	3.23455e-07	0.785191	0.960143
IGFBP3	1.19968e-11	0.406811	0.167	0.127	3.3519e-07	1.07648	1.35846
HMGN1	1.30399e-11	0.253712	0.207	0.163	3.64335e-07	0.911134	1.08699
ORMDL1	1.36706e-11	0.241958	0.146	0.107	3.81956e-07	0.66689	0.834603
TBX3	1.47101e-11	0.261084	0.145	0.107	4.11e-07	0.75644	0.93741
KLF2	1.60613e-11	-0.226974	0.108	0.145	4.48752e-07	0.962897	0.805571
MAP3K5	1.78064e-11	0.251233	0.148	0.109	4.97509e-07	0.767915	0.942057
ZFHX3	1.86978e-11	-0.213694	0.114	0.151	5.22415e-07	0.944127	0.796006
USP36	2.10104e-11	-0.238662	0.144	0.185	5.8703e-07	1.10422	0.938796
ACSL4	2.10795e-11	-0.345839	0.087	0.119	5.88961e-07	0.863539	0.623822
TTLL3	2.34193e-11	0.284566	0.208	0.166	6.54334e-07	0.954664	1.15191
ITGA5	2.5336e-11	-0.174974	0.193	0.239	7.07889e-07	1.53209	1.41081
MTCH1	2.74598e-11	0.204342	0.187	0.144	7.67226e-07	0.895766	1.03741
SRGAP1	3.22474e-11	-0.214634	0.149	0.191	9.00992e-07	1.13414	0.985371
NOP56	3.27637e-11	-0.264017	0.13	0.168	9.15417e-07	1.03965	0.85665
CYBRD1	3.41688e-11	-0.252743	0.077	0.108	9.54677e-07	0.656757	0.481568
ANKRD28	3.97379e-11	-0.19027	0.214	0.26	1.11028e-06	1.42857	1.29669
NRDC	4.02452e-11	0.251017	0.236	0.191	1.12445e-06	1.0703	1.2443
LPP	4.135e-11	-0.176223	0.301	0.351	1.15532e-06	1.74703	1.62488
MALAT1	4.23693e-11	-0.0672437	1	1	1.1838e-06	7.54995	7.50334
AC016831.1	4.24444e-11	-0.26981	0.09	0.123	1.1859e-06	0.807306	0.620288
GFPT2	4.75239e-11	-0.25401	0.145	0.185	1.32782e-06	1.21002	1.03395
TIPARP	4.81366e-11	-0.238285	0.104	0.139	1.34494e-06	0.908913	0.743746
SLC7A8	4.98186e-11	-0.191836	0.079	0.111	1.39193e-06	0.725469	0.592498
GABPB1-IT1	5.17657e-11	-0.239855	0.078	0.109	1.44633e-06	0.67155	0.505296
SRSF11	6.63423e-11	0.206736	0.549	0.506	1.8536e-06	2.09354	2.23684
TNXB	6.92906e-11	0.263044	0.33	0.282	1.93598e-06	1.56595	1.74828
SLC25A37	8.19355e-11	0.176228	0.356	0.303	2.28928e-06	1.56579	1.68795
HYMAI	8.9479e-11	0.234658	0.139	0.103	2.50004e-06	0.710309	0.872961
RPL17	1.05246e-10	-0.204039	0.203	0.248	2.94057e-06	1.28803	1.14661
SAT1	1.05879e-10	0.150091	0.654	0.6	2.95826e-06	2.75886	2.8629
TSC22D2	1.08798e-10	-0.363337	0.117	0.152	3.03982e-06	1.04313	0.791285
ACTB	1.11531e-10	-0.158372	0.391	0.446	3.11617e-06	2.00467	1.89489
GPS2	1.47068e-10	0.245899	0.128	0.093	4.10908e-06	0.643226	0.81367
TIMP2	1.62015e-10	-0.233716	0.241	0.284	4.52671e-06	1.4334	1.2714
DIAPH2	1.64335e-10	0.241139	0.211	0.169	4.59151e-06	0.993637	1.16078
MEG3	1.67739e-10	-0.152928	0.702	0.721	4.68664e-06	3.33005	3.22405
DSE	1.7507e-10	-0.300948	0.134	0.17	4.89145e-06	1.07561	0.86701
MT-ND5	1.93831e-10	-0.129991	0.547	0.602	5.41563e-06	2.71255	2.62245
ENAH	1.97738e-10	-0.236386	0.135	0.173	5.52481e-06	1.07855	0.914701
SLC2A3	2.00976e-10	0.385103	0.243	0.201	5.61527e-06	1.30122	1.56815
MT-CO3	2.01409e-10	-0.00525829	0.753	0.804	5.62735e-06	3.70994	3.70629
NEXN	3.03817e-10	-0.218845	0.177	0.22	8.48865e-06	1.42573	1.27404
RPL9	3.05164e-10	-0.25599	0.168	0.207	8.52627e-06	1.1704	0.992959
MT-ND4L	3.06435e-10	-0.176001	0.366	0.418	8.5618e-06	2.01127	1.88927
CCZ1	3.1062e-10	0.181491	0.101	0.071	8.67872e-06	0.508784	0.634584
ZNF302	3.726e-10	0.205143	0.125	0.091	1.04105e-05	0.597741	0.739935
HSP90AB1	3.91552e-10	-0.271912	0.234	0.275	1.094e-05	1.51293	1.32446
ATP13A3	4.52311e-10	-0.314471	0.196	0.234	1.26376e-05	1.31575	1.09778
PHF1	4.913e-10	0.290113	0.113	0.082	1.37269e-05	0.582434	0.783525
SLIT3	5.04673e-10	-0.221782	0.109	0.142	1.41006e-05	0.905685	0.751957
AC020916.1	5.67265e-10	0.315348	0.468	0.426	1.58494e-05	2.36315	2.58174
SYNE2	5.7621e-10	-0.152139	0.254	0.304	1.60993e-05	1.59322	1.48777
HSP90B1	5.83606e-10	-0.220846	0.255	0.298	1.63059e-05	1.51537	1.36229
CDH11	5.96733e-10	-0.254058	0.164	0.201	1.66727e-05	1.11227	0.936175
PPP1R15A	6.11165e-10	0.258662	0.175	0.137	1.70759e-05	0.917052	1.09634
SYNCRIP	6.48371e-10	-0.23484	0.152	0.189	1.81155e-05	1.05626	0.893476
PHYKPL	6.97468e-10	0.211385	0.166	0.128	1.94873e-05	0.775309	0.92183
SERPINB6	7.14261e-10	0.219825	0.171	0.133	1.99565e-05	0.838855	0.991226
HNRNPU	7.46654e-10	-0.103922	0.666	0.705	2.08615e-05	2.8041	2.73207
MAP1B	7.55878e-10	-0.269943	0.118	0.152	2.11192e-05	1.06318	0.876072
ASCC3	7.72061e-10	0.254137	0.223	0.183	2.15714e-05	1.04295	1.21911
LAMB1	7.75456e-10	-0.125123	0.277	0.326	2.16662e-05	1.6757	1.58897
BRD8	7.87761e-10	0.243914	0.126	0.093	2.20101e-05	0.639059	0.808128
CEP126	8.40335e-10	0.181165	0.191	0.151	2.3479e-05	1.00427	1.12984
RPL36	9.0491e-10	-0.201123	0.152	0.19	2.52832e-05	1.09688	0.957467
ULK1	9.71847e-10	0.255791	0.203	0.163	2.71534e-05	0.968782	1.14608
IGFBP7	1.02576e-09	0.327383	0.291	0.252	2.86599e-05	1.29318	1.5201
FAT1	1.02902e-09	-0.397987	0.104	0.135	2.87507e-05	1.01829	0.742425
LIMA1	1.29635e-09	0.232178	0.377	0.334	3.62199e-05	1.69222	1.85316
PGR	1.53026e-09	0.200632	0.201	0.16	4.27554e-05	1.16163	1.3007
ADAM17	1.54465e-09	-0.151472	0.181	0.222	4.31576e-05	1.1961	1.0911
PAFAH1B1	1.55306e-09	0.234498	0.249	0.208	4.33924e-05	1.09648	1.25902
MGP	1.60066e-09	-0.0817899	0.42	0.47	4.47225e-05	2.40911	2.35242
CACNA1D	1.61622e-09	-0.292072	0.148	0.184	4.51571e-05	1.25615	1.0537
SRRM2	1.76053e-09	0.180073	0.782	0.759	4.91893e-05	2.82279	2.94761
ZFYVE16	1.84773e-09	0.213874	0.307	0.262	5.16255e-05	1.34799	1.49624
LMOD1	2.41862e-09	0.245954	0.121	0.09	6.75763e-05	0.661707	0.83219
TSIX	2.44273e-09	0.231049	0.156	0.121	6.82498e-05	0.804702	0.964853
NFKBIA	2.46301e-09	-0.226818	0.209	0.249	6.88166e-05	1.46968	1.31246
STAT6	2.59414e-09	0.266125	0.138	0.106	7.24803e-05	0.662011	0.846475
STARD13	2.76081e-09	0.194731	0.106	0.076	7.71371e-05	0.527959	0.662936
COL18A1	3.05191e-09	0.267081	0.193	0.156	8.52703e-05	0.984428	1.16955
KANSL3	3.10845e-09	0.238694	0.103	0.075	8.68502e-05	0.505136	0.670585
C1orf21	3.1914e-09	-0.219089	0.218	0.257	8.91677e-05	1.38189	1.23003
TSC2	3.44601e-09	0.270684	0.132	0.101	9.62815e-05	0.657098	0.844722
COL4A2	3.51273e-09	0.152971	0.363	0.315	9.81458e-05	1.70106	1.80709
CCDC57	3.85216e-09	0.261806	0.109	0.08	0.000107629	0.532735	0.714205
SLC20A1	4.05719e-09	-0.214665	0.11	0.142	0.000113358	0.947188	0.798394
RPL21	4.37e-09	-0.230321	0.181	0.218	0.000122098	1.22623	1.06658
COL15A1	4.59426e-09	0.176954	0.126	0.094	0.000128364	0.652268	0.774923
RASAL2	5.15611e-09	-0.208591	0.074	0.101	0.000144062	0.698529	0.553945
MAPK8IP3	5.18326e-09	0.24219	0.1	0.072	0.00014482	0.509872	0.677745
ZYX	5.29806e-09	0.203435	0.102	0.074	0.000148028	0.53003	0.67104
SULF1	5.49273e-09	-0.265057	0.177	0.214	0.000153467	1.30037	1.11665
PRLR	5.65732e-09	0.237417	0.122	0.091	0.000158065	0.713423	0.877988
FNDC3B	5.66707e-09	-0.177875	0.246	0.288	0.000158338	1.4251	1.3018
HLA-C	5.6685e-09	0.183491	0.112	0.082	0.000158378	0.549973	0.677159
TRIM73	5.67062e-09	0.247365	0.142	0.11	0.000158437	0.689622	0.861083
COL6A2	6.03986e-09	0.165009	0.485	0.443	0.000168754	1.97184	2.08622
MCC	6.7863e-09	0.16645	0.157	0.121	0.000189609	0.822899	0.938273
ACTA2	6.91538e-09	-0.0668656	0.151	0.189	0.000193216	1.26213	1.21578
POLR2J3	6.94116e-09	0.213888	0.402	0.362	0.000193936	1.6483	1.79656
DAB2	7.4599e-09	0.204929	0.133	0.101	0.00020843	0.682044	0.82409
KCTD20	8.75894e-09	-0.215296	0.079	0.106	0.000244725	0.682816	0.533584
TNS2	9.05763e-09	0.176965	0.198	0.16	0.00025307	0.999834	1.1225
RNF217	9.30657e-09	-0.251465	0.097	0.126	0.000260026	0.801544	0.627241
CALD1	9.54771e-09	-0.101598	0.808	0.822	0.000266763	3.30035	3.22993
ENTPD1	9.7172e-09	0.280604	0.1	0.073	0.000271498	0.594948	0.789448
CRYBG3	1.0099e-08	0.215601	0.226	0.187	0.000282166	1.11974	1.26918
HSPA1A	1.26283e-08	0.49721	0.235	0.199	0.000352834	1.70504	2.04968
MBNL1	1.3042e-08	-0.186274	0.356	0.399	0.000364394	1.80863	1.67952
REV3L	1.40178e-08	0.232248	0.447	0.41	0.000391658	1.97288	2.13386
SGIP1	1.45637e-08	0.156284	0.249	0.206	0.000406911	1.29611	1.40444
ADAMTS5	1.50832e-08	0.292435	0.11	0.082	0.000421423	0.643438	0.846138
AFDN	1.56771e-08	-0.142078	0.213	0.254	0.000438019	1.31526	1.21678
ESR1	1.60766e-08	0.108775	0.202	0.161	0.000449181	1.05221	1.12761
PHACTR2	2.33394e-08	0.267984	0.145	0.114	0.000652103	0.716319	0.902071
AC245060.5	2.5742e-08	-0.19639	0.113	0.144	0.00071923	1.00107	0.864943
C11orf96	2.73985e-08	0.226702	0.171	0.136	0.000765514	0.967293	1.12443
FAU	2.79654e-08	0.227658	0.127	0.097	0.000781353	0.62066	0.778461
MXRA8	3.16103e-08	0.205382	0.137	0.106	0.000883192	0.643888	0.786247
DLG5	3.41629e-08	0.2704	0.128	0.098	0.000954513	0.62688	0.814307
FSTL1	4.18493e-08	-0.140617	0.279	0.319	0.00116927	1.5405	1.44303
OTUD4	4.37846e-08	-0.220594	0.076	0.101	0.00122334	0.686006	0.533102
ETS2	4.67805e-08	0.154501	0.1	0.073	0.00130705	0.559775	0.666867
SFRP4	4.72639e-08	-0.15265	0.249	0.293	0.00132055	1.73915	1.63334
SVIL	4.92811e-08	-0.188982	0.29	0.33	0.00137691	1.75426	1.62327
MIR99AHG	5.16347e-08	0.173013	0.487	0.446	0.00144267	2.10701	2.22694
TOX4	5.23129e-08	0.191465	0.111	0.083	0.00146162	0.55682	0.689533
HDLBP	5.29829e-08	-0.179932	0.174	0.208	0.00148034	1.13162	1.0069
PRMT2	5.45379e-08	0.228625	0.232	0.195	0.00152379	1.08438	1.24285
FOXP1	5.46296e-08	-0.153871	0.343	0.383	0.00152635	1.77958	1.67292
ABCA9	5.69198e-08	0.24916	0.175	0.142	0.00159034	0.96566	1.13836
FLNB	5.69323e-08	-0.282269	0.099	0.126	0.00159069	0.947828	0.752174
AC008735.2	6.06662e-08	0.200752	0.115	0.087	0.00169501	0.647649	0.7868
ANKRD11	6.80489e-08	-0.152717	0.364	0.404	0.00190129	1.82755	1.7217
STK3	7.47404e-08	0.184684	0.167	0.134	0.00208825	0.802219	0.930232
PGAP1	7.55117e-08	-0.315733	0.104	0.131	0.0021098	1.01037	0.791516
AC005670.3	7.73197e-08	0.204453	0.105	0.079	0.00216031	0.524517	0.666232
FBLIM1	7.76296e-08	0.174433	0.109	0.081	0.00216897	0.55293	0.673838
EDRF1	8.31087e-08	0.225952	0.107	0.08	0.00232206	0.544806	0.701424
MOK	9.53202e-08	0.1792	0.111	0.083	0.00266325	0.586153	0.710365
COL4A1	9.7871e-08	0.187772	0.328	0.285	0.00273451	1.67481	1.80497
WDR11	9.78895e-08	0.207992	0.152	0.121	0.00273503	0.728548	0.872717
FUS	9.97373e-08	0.166166	0.58	0.552	0.00278666	2.2003	2.31548
CLIC4	1.03872e-07	-0.227119	0.095	0.12	0.00290217	0.72289	0.565463
HEG1	1.07512e-07	-0.181382	0.081	0.106	0.0030039	0.717865	0.59214
PTMA	1.12058e-07	-0.0896072	0.383	0.434	0.00313089	1.99039	1.92828
CEP350	1.18586e-07	-0.165808	0.209	0.245	0.0033133	1.28726	1.17233
SPEN	1.20237e-07	-0.163271	0.18	0.215	0.00335944	1.20357	1.0904
TFPI	1.37609e-07	0.198178	0.212	0.176	0.0038448	1.091	1.22836
GOLGA3	1.44575e-07	-0.176358	0.141	0.172	0.00403944	0.971765	0.849523
TRMT11	1.49221e-07	0.197767	0.132	0.103	0.00416924	0.668937	0.806018
TPT1	1.76308e-07	-0.141628	0.331	0.373	0.00492605	1.77539	1.67723
HP1BP3	1.88873e-07	-0.129082	0.454	0.493	0.0052771	2.02741	1.93794
IFT88	1.91853e-07	0.177142	0.1	0.075	0.00536037	0.516357	0.639143
MSRB3	1.95739e-07	-0.187322	0.088	0.114	0.00546894	0.734804	0.604962
MEIS1-AS2	2.06032e-07	0.16864	0.101	0.076	0.00575654	0.554854	0.671746
DNM1	2.08384e-07	0.224984	0.152	0.122	0.00582224	0.778853	0.9348
NCOR2	2.14256e-07	-0.19078	0.208	0.242	0.00598631	1.30299	1.17075
TOP1	2.14259e-07	-0.185282	0.179	0.212	0.0059864	1.20498	1.07656
JUNB	2.26396e-07	0.279806	0.307	0.271	0.0063255	1.54166	1.73561
LGALS3	2.28114e-07	0.146468	0.108	0.082	0.00637351	0.560018	0.661542
UBE2B	2.39089e-07	0.194017	0.147	0.117	0.00668014	0.716696	0.851179
LUC7L	2.45456e-07	0.209626	0.351	0.314	0.00685803	1.50464	1.64994
CD59	2.77439e-07	-0.232459	0.098	0.123	0.00775165	0.761242	0.600114
PGM3	2.8141e-07	-0.142262	0.094	0.12	0.0078626	0.734735	0.636127
FBXL5	2.96229e-07	0.177163	0.115	0.088	0.00827664	0.572143	0.694943
USP53	2.99466e-07	-0.170626	0.169	0.202	0.00836707	1.20909	1.09083
AOPEP	3.00961e-07	0.176584	0.189	0.156	0.00840885	0.930376	1.05278
PSD3	3.07636e-07	0.189522	0.133	0.105	0.00859535	0.684434	0.815801
DDX24	3.57732e-07	0.165629	0.352	0.313	0.00999504	1.54631	1.66111
IFNAR1	4.07526e-07	0.149845	0.112	0.085	0.0113863	0.586703	0.690568
ZNF117	4.19551e-07	-0.148367	0.103	0.129	0.0117222	0.792379	0.689539
NUCKS1	4.69845e-07	-0.187248	0.183	0.215	0.0131275	1.183	1.05321
MYH9	4.7241e-07	-0.170412	0.166	0.197	0.0131991	1.11027	0.992149
SOD2	4.94552e-07	-0.541082	0.311	0.339	0.0138178	2.44564	2.07059
TTC17	4.96096e-07	0.197518	0.225	0.19	0.0138609	1.03708	1.17399
MYL9	5.01149e-07	-0.229723	0.175	0.205	0.0140021	1.25023	1.091
SPARCL1	5.20725e-07	-0.0420079	0.444	0.495	0.014549	2.19653	2.16741
MAGI2-AS3	5.25156e-07	-0.163058	0.247	0.282	0.0146729	1.42034	1.30731
CFH	5.64178e-07	-0.121347	0.15	0.182	0.0157631	1.14998	1.06587
GBP1	5.76996e-07	0.2429	0.11	0.085	0.0161213	0.644628	0.812994
WASHC1	5.81429e-07	0.213117	0.105	0.08	0.0162451	0.557101	0.704823
SRP19	5.84156e-07	0.240694	0.121	0.096	0.0163213	0.630641	0.797477
MT-ND6	5.87729e-07	0.190701	0.172	0.141	0.0164212	0.927017	1.0592
PPWD1	5.94806e-07	0.207449	0.129	0.102	0.0166189	0.660456	0.804248
HECTD2	6.45962e-07	-0.172062	0.088	0.113	0.0180482	0.696584	0.57732
XRRA1	6.72012e-07	-0.142709	0.083	0.107	0.018776	0.672846	0.573928
NAP1L1	6.79113e-07	-0.182797	0.287	0.321	0.0189744	1.55497	1.42827
SNRNP70	7.11169e-07	0.1974	0.445	0.412	0.0198701	1.7968	1.93363
NUFIP2	7.58588e-07	-0.18728	0.176	0.206	0.0211949	1.11302	0.983212
UBA52	8.03449e-07	-0.24807	0.099	0.123	0.0224484	0.767596	0.595647
MTRNR2L12	9.64012e-07	-0.0943179	0.54	0.59	0.0269345	2.61295	2.54757
KIF21A	9.78196e-07	0.203675	0.109	0.084	0.0273308	0.629619	0.770796
TAGLN2	1.04472e-06	0.152879	0.109	0.084	0.0291896	0.580023	0.685991
TULP4	1.05429e-06	0.170165	0.102	0.078	0.0294569	0.50674	0.624689
PKD2	1.05643e-06	-0.125709	0.159	0.19	0.0295167	1.05629	0.969154
FAR1	1.07221e-06	-0.159782	0.158	0.188	0.0299575	1.00987	0.899119
RSBN1L	1.118e-06	0.127891	0.146	0.117	0.031237	0.7812	0.869848
PLEKHA4	1.18082e-06	0.185368	0.114	0.089	0.032992	0.682053	0.810541
FYN	1.1872e-06	0.195424	0.156	0.128	0.0331703	0.807157	0.942615
CREB5	1.19643e-06	0.229131	0.134	0.107	0.0334284	0.759405	0.918227
SEC22B	1.20776e-06	-0.202978	0.089	0.113	0.0337447	0.689136	0.548443
MAP1LC3A	1.20919e-06	0.188248	0.11	0.085	0.0337849	0.59373	0.724213
CEP290	1.36826e-06	-0.192059	0.14	0.167	0.0382291	1.02415	0.891027
XPA	1.43564e-06	0.248759	0.112	0.088	0.0401119	0.578065	0.750491
APBB2	1.50014e-06	-0.117223	0.091	0.116	0.041914	0.713742	0.632489
TBL1X	1.74222e-06	0.218664	0.145	0.117	0.0486777	0.773017	0.924583
