# Supplementary material for: Dienogest interrupts the chemokine signalling axis in endometriotic lesions with resistant signatures providing novel opportunities for personalised treatment.
Source: Research Square preprint supplement (doi:10.21203/rs.3.rs-8096027/v1), 2026-01-13
Supplement: Supplementary file 11 [file f6f59bd27a7040307463424d.xlsx]

## Sheet: Sheet1
Supplementary Table 5: DEG between treated and non-treated in myeloid cells
gene_ID	p_val	avg_log2FC	pct.1	pct.2	p_val_adj	mean_response_TRUE	mean_response_FALSE
MS4A6A	2.10776e-14	0.639905	0.575	0.379	5.88908e-10	2.16301	2.60656
SELENOP	3.06495e-14	1.06404	0.353	0.19	8.56346e-10	1.43217	2.1697
FRMD4B	3.97507e-14	0.591508	0.472	0.277	1.11064e-09	1.64653	2.05653
CCDC144A	1.56296e-13	0.735128	0.347	0.176	4.36691e-09	1.17007	1.67962
SAT1	2.05621e-13	0.5045	0.903	0.822	5.74505e-09	3.75913	4.10882
HLA-DRB5	3.80943e-13	0.875525	0.218	0.081	1.06436e-08	0.597378	1.20425
PAX8-AS1	1.20702e-12	0.709223	0.237	0.095	3.37241e-08	0.836085	1.32768
MS4A7	3.25916e-12	0.583939	0.6	0.434	9.1061e-08	2.32488	2.72963
ADAP2	1.40813e-11	0.726666	0.346	0.194	3.93432e-07	1.21925	1.72294
TNFRSF25	2.75169e-11	0.815511	0.157	0.048	7.68823e-07	0.46515	1.03042
CD74	3.12065e-11	0.537269	0.593	0.425	8.71908e-07	2.29075	2.66315
LPAR6	3.94943e-11	0.62516	0.317	0.168	1.10347e-06	1.23789	1.67121
F13A1	5.07689e-11	0.677634	0.407	0.247	1.41848e-06	1.72886	2.19856
TPCN1	5.10637e-11	0.63202	0.192	0.074	1.42672e-06	0.597274	1.03536
ARL4C	2.58159e-10	0.501398	0.363	0.212	7.21296e-06	1.48943	1.83697
GPR155	2.6781e-10	0.63213	0.218	0.095	7.4826e-06	0.757575	1.19573
CD14	2.73823e-10	0.779169	0.234	0.113	7.65061e-06	0.769206	1.30929
CSF1R	3.22496e-10	0.667659	0.248	0.122	9.01053e-06	0.774975	1.23776
LGMN	7.27335e-10	0.698318	0.279	0.15	2.03217e-05	1.06278	1.54682
ACSL1	7.56113e-10	-0.731267	0.219	0.339	2.11258e-05	1.84458	1.33771
SRGAP3	1.15453e-09	0.702183	0.196	0.083	3.22576e-05	0.634935	1.12165
IL10RA	1.30734e-09	0.500032	0.308	0.169	3.65272e-05	1.11233	1.45892
SLC40A1	1.36497e-09	0.786092	0.173	0.069	3.81374e-05	0.568839	1.11372
NAIP	1.74332e-09	0.422763	0.435	0.282	4.87083e-05	1.65918	1.95221
RASSF4	1.76125e-09	0.434382	0.451	0.295	4.92094e-05	1.73576	2.03685
PLXDC1	1.99306e-09	0.559659	0.171	0.065	5.56862e-05	0.616553	1.00448
FAM13A	2.05124e-09	0.675878	0.187	0.079	5.73115e-05	0.588587	1.05707
MMP19	8.6467e-09	-0.770934	0.11	0.203	0.000241589	1.66133	1.12696
NAGK	9.75119e-09	0.606381	0.228	0.115	0.000272448	0.749711	1.17002
MALAT1	1.00733e-08	-0.165322	1	1	0.000281447	7.3278	7.21321
MAF	1.04852e-08	0.652365	0.387	0.259	0.000292957	1.59179	2.04397
CD163L1	1.08087e-08	0.771111	0.246	0.132	0.000301996	1.0272	1.56169
LUCAT1	1.16694e-08	-0.906175	0.056	0.127	0.000326043	1.20457	0.576458
PLXND1	1.18259e-08	0.578241	0.263	0.145	0.000330415	0.962738	1.36354
ATM	1.2224e-08	0.386606	0.402	0.261	0.00034154	1.50382	1.7718
PER3	1.57096e-08	0.624377	0.185	0.083	0.000438925	0.634604	1.06739
WWP1	1.79034e-08	0.630835	0.188	0.086	0.00050022	0.631969	1.06923
SLC1A3	2.59495e-08	-0.713093	0.174	0.275	0.000725028	1.70801	1.21373
BTG2	2.64162e-08	0.660906	0.286	0.168	0.00073807	1.09511	1.55322
HLA-DMB	5.21728e-08	0.492326	0.269	0.153	0.00145771	1.00186	1.34312
TNFAIP2	5.49479e-08	0.597185	0.447	0.319	0.00153524	1.75253	2.16647
TENT2	7.13402e-08	0.503856	0.207	0.104	0.00199324	0.706147	1.05539
FAM118A	8.0112e-08	0.379544	0.228	0.12	0.00223833	0.972622	1.2357
HLA-DPA1	9.94004e-08	0.515171	0.314	0.194	0.00277725	1.25908	1.61617
JAK2	1.08684e-07	0.458832	0.176	0.081	0.00303662	0.628165	0.946203
NCF4	1.16264e-07	0.596125	0.168	0.078	0.00324841	0.553527	0.96673
RSRP1	1.26136e-07	0.368118	0.513	0.37	0.00352425	1.78883	2.04399
SERPINB6	1.31717e-07	0.411336	0.299	0.178	0.00368017	1.10465	1.38977
EVL	1.49702e-07	0.51257	0.24	0.134	0.00418266	0.884712	1.24
CTSC	1.59157e-07	0.408782	0.25	0.141	0.00444685	1.03367	1.31702
NCOA7	1.9814e-07	0.504216	0.202	0.102	0.00553604	0.767664	1.11716
SNX29	2.00666e-07	0.40593	0.342	0.217	0.00560661	1.28127	1.56264
TNK2	2.16009e-07	0.460499	0.105	0.034	0.00603529	0.300615	0.619808
FOLR2	2.50017e-07	0.525902	0.112	0.039	0.00698547	0.2862	0.650727
HLA-DMA	2.75334e-07	0.478867	0.197	0.101	0.00769283	0.670687	1.00261
XAF1	3.22918e-07	0.421354	0.28	0.164	0.00902233	1.24335	1.53541
CIITA	3.70784e-07	0.386015	0.453	0.326	0.0103597	1.83409	2.10165
SIN3B	4.66593e-07	0.447246	0.206	0.109	0.0130366	0.779739	1.08975
AP1B1	5.09753e-07	0.523515	0.21	0.113	0.0142425	0.794097	1.15697
JUNB	5.10072e-07	0.491982	0.254	0.146	0.0142514	1.00119	1.3422
STX7	5.87738e-07	0.306268	0.355	0.228	0.0164214	1.35566	1.56794
AREG	7.0447e-07	-0.971658	0.095	0.169	0.0196829	1.85563	1.18213
TBC1D22A	7.14903e-07	0.427064	0.233	0.131	0.0199744	0.905953	1.20197
EPB41L2	7.22114e-07	0.478653	0.253	0.148	0.0201759	0.994219	1.326
NCKAP1L	8.02796e-07	0.405969	0.337	0.217	0.0224301	1.2662	1.54759
SLC11A1	8.09872e-07	-0.43256	0.202	0.3	0.0226278	1.89861	1.59878
TUT4	8.70751e-07	0.357251	0.352	0.229	0.0243288	1.36804	1.61567
MPEG1	1.001e-06	0.408773	0.164	0.079	0.0279678	0.626395	0.909735
TMEM106A	1.03472e-06	0.535397	0.197	0.108	0.0289102	0.689458	1.06057
PLEKHG5	1.13039e-06	0.479875	0.104	0.037	0.031583	0.313503	0.646127
IFI44L	1.15227e-06	0.548233	0.114	0.044	0.0321945	0.436804	0.81681
RUNX1	1.19219e-06	0.390051	0.314	0.196	0.0333098	1.27951	1.54987
RNF213	1.4303e-06	0.282312	0.531	0.393	0.0399625	2.01175	2.20743
